# Supplementary material for: Multi-center screening of the Pathogen Box collection for schistosomiasis drug discovery
Source: Parasit Vectors. 2019 Oct 22;12:493. doi: 10.1186/s13071-019-3747-6 (PMC6805474; doi:10.1186/s13071-019-3747-6)
Supplement: Supplementary file 1 — Additional file 1: Table S1. Descriptors and associated severity scores applied by UCSD. Table S2. Concordance between the 3 groups for active and inactive compounds. Table S3. Data transformation. Table S4. Unique hits per group. Table S5. Active compounds shared by all three groups (‘core actives’). Table S6. Transformed activity of the reference compounds. Table S7. Comparisons with data previously generated for the same compounds. Table S8. Transformed activity by disease set. Table S9. Core active compounds compared to activity measured previously by the Swiss TPH against adult S. mansoni. [file 13071_2019_3747_MOESM1_ESM.xlsx]

## Sheet: __JChemStructureSheet
Hash	StructureStringLength	StructureStringFormat	StructureString
2046B2D6BA070AEAC9B6AF140C1CAF47	1	cxsmiles	JChemExcelPQAAAB+LCAAAAAAABADtvQdgHEmWJSYvbcp7f0r1StfgdKEIgGATJNiQQBDswYjN5pLsHWlHIymrKoHKZVZlXWYWQMztnbz33nvvvffee++997o7nU4n99//P1xmZAFs9s5K2smeIYCqyB8/fnwfPyJOXm999uUd/H+6O51Ot6bT3e+9+OT7+OB7X25//84JfnuxdXKyd3Jy8uXenem95XR/ime/uff/AIS0XHo9AAAA
341B3B527B04392326187DBF16A14A97	1	cxsmiles	JChemExcelJQAAAB+LCAAAAAAABADtvQdgHEmWJSYvbcp7f0r1StfgdKEIgGATJNiQQBDswYjN5pLsHWlHIymrKoHKZVZlXWYWQMztnbz33nvvvffee++997o7nU4n99//P1xmZAFs9s5K2smeIYCqyB8/fnwfPyJOvpzuTunZmu7eWe4tl8vp3uutz768g/+fTO/hq+m9/weDlVgYJQAAAA==
D66E8EABCBA5A80993234476D5F3A269	1	cxsmiles	JChemExcelKAAAAB+LCAAAAAAABADtvQdgHEmWJSYvbcp7f0r1StfgdKEIgGATJNiQQBDswYjN5pLsHWlHIymrKoHKZVZlXWYWQMztnbz33nvvvffee++997o7nU4n99//P1xmZAFs9s5K2smeIYCqyB8/fnwfPyJOXkx3l8vp1uuTvc9Otk7KOydbn31558XWi89O9u5M703x3LvT7P4/Yvgi6SgAAAA=
6EA3D4F351E7179277314EA872EED8AA	1	cxsmiles	JChemExcelNQAAAB+LCAAAAAAABADtvQdgHEmWJSYvbcp7f0r1StfgdKEIgGATJNiQQBDswYjN5pLsHWlHIymrKoHKZVZlXWYWQMztnbz33nvvvffee++997o7nU4n99//P1xmZAFs9s5K2smeIYCqyB8/fnwfPyJOTr482frsyzvT3enWyZ3pVjPdfSEf7E23nt0J/r/37A5/9eL/AZdugm01AAAA
00C036FB60E235721D33BDD45443F9D1	1	cxsmiles	JChemExcelLgAAAB+LCAAAAAAABADtvQdgHEmWJSYvbcp7f0r1StfgdKEIgGATJNiQQBDswYjN5pLsHWlHIymrKoHKZVZlXWYWQMztnbz33nvvvffee++997o7nU4n99//P1xmZAFs9s5K2smeIYCqyB8/fnwfPyJOdk9OXmyd7N452ZruTelZ7t2Z3ptufW/57e9P9/HB9N7+nel9/u3+/wNu3cIBLgAAAA==
A6F6C84EEEE0293861F691BECC2C98AA	1	cxsmiles	JChemExcelLQAAAB+LCAAAAAAABADtvQdgHEmWJSYvbcp7f0r1StfgdKEIgGATJNiQQBDswYjN5pLsHWlHIymrKoHKZVZlXWYWQMztnbz33nvvvffee++997o7nU4n99//P1xmZAFs9s5K2smeIYCqyB8/fnwfPyKenWw9u0P/m+5O6dma7t452frsyzsvpnvVdGu53LszvYfPT8o70+m9/wcZHVKtLQAAAA==
D37813404F6E21338DC7CA39314EE8AE	1	cxsmiles	JChemExcelIwAAAB+LCAAAAAAABADtvQdgHEmWJSYvbcp7f0r1StfgdKEIgGATJNiQQBDswYjN5pLsHWlHIymrKoHKZVZlXWYWQMztnbz33nvvvffee++997o7nU4n99//P1xmZAFs9s5K2smeIYCqyB8/fnwfPyJOXuyebH325Z0XWyd3pnvLZro13TvZpQ9e41P8/+T/AR7OeWIjAAAA
DDCC36729A6EB3C967922C8C548F8138	1	cxsmiles	JChemExcelHQAAAB+LCAAAAAAABADtvQdgHEmWJSYvbcp7f0r1StfgdKEIgGATJNiQQBDswYjN5pLsHWlHIymrKoHKZVZlXWYWQMztnbz33nvvvffee++997o7nU4n99//P1xmZAFs9s5K2smeIYCqyB8/fnwfPyJOvpzuTunZmu7eWe4tl8vp3uutz768g/+f/D+9ijWhHQAAAA==
E1BFC9F973F712E099681F0C0CBD1047	1	cxsmiles	JChemExcelNgAAAB+LCAAAAAAABADtvQdgHEmWJSYvbcp7f0r1StfgdKEIgGATJNiQQBDswYjN5pLsHWlHIymrKoHKZVZlXWYWQMztnbz33nvvvffee++997o7nU4n99//P1xmZAFs9s5K2smeIYCqyB8/fnwfPyK+/N7J7/nt72/xv7sn9LzYvTPdm063ltN7060pPXv37pxsPbtD/3tmf/l/ADrPRdk2AAAA
B1EB1F680A748F0D0FE2945F0C853E14	1	cxsmiles	JChemExcelMAAAAB+LCAAAAAAABADtvQdgHEmWJSYvbcp7f0r1StfgdKEIgGATJNiQQBDswYjN5pLsHWlHIymrKoHKZVZlXWYWQMztnbz33nvvvffee++997o7nU4n99//P1xmZAFs9s5K2smeIYCqyB8/fnwfPyJOvjzZ+uzLO9Pd6d4JnuleM919IZ/dm249uxP8/96z/wf6jd8hMAAAAA==
767AB14C344B644080F8D645CF913839	1	cxsmiles	JChemExcelMgAAAB+LCAAAAAAABADtvQdgHEmWJSYvbcp7f0r1StfgdKEIgGATJNiQQBDswYjN5pLsHWlHIymrKoHKZVZlXWYWQMztnbz33nvvvffee++997o7nU4n99//P1xmZAFs9s5K2smeIYCqyB8/fnwfPyJOyunulJ6tFydbn315Z7o3XdLv905OXmydnNy7M92f0gfT/TvTrZOSvr0z3f1/AKKEiM4yAAAA
81EAD6ADE94282B499A4A44069497DEF	1	cxsmiles	JChemExcelKAAAAB+LCAAAAAAABADtvQdgHEmWJSYvbcp7f0r1StfgdKEIgGATJNiQQBDswYjN5pLsHWlHIymrKoHKZVZlXWYWQMztnbz33nvvvffee++997o7nU4n99//P1xmZAFs9s5K2smeIYCqyB8/fnwfPyJOXuyenLzYOjnZvXOyNd2bTqfN3p3pvenWyZ3vLb/9/en+FM+9/f8Huj+mkSgAAAA=
BC0965B423ABD946E593D69AE26FB166	1	cxsmiles	JChemExcelIAAAAB+LCAAAAAAABADtvQdgHEmWJSYvbcp7f0r1StfgdKEIgGATJNiQQBDswYjN5pLsHWlHIymrKoHKZVZlXWYWQMztnbz33nvvvffee++997o7nU4n99//P1xmZAFs9s5K2smeIYCqyB8/fnwfPyJOTk62Xk93q+neFM/ecvfOydZnX955Mb23nE6be/8PazIugyAAAAA=
367654BEFB2805969FB5711C9DC9861A	1	cxsmiles	JChemExcelKwAAAB+LCAAAAAAABADtvQdgHEmWJSYvbcp7f0r1StfgdKEIgGATJNiQQBDswYjN5pLsHWlHIymrKoHKZVZlXWYWQMztnbz33nvvvffee++997o7nU4n99//P1xmZAFs9s5K2smeIYCqyB8/fnwfPyJOprvT6daLk5Pp3hTP3p0l/tz67MWdF9N79MHWSXlnOr13Z7n7/wDmn9F/KwAAAA==
65F4B3CCA9027A747D0B37EC57E5DD29	1	cxsmiles	JChemExcelKQAAAB+LCAAAAAAABADtvQdgHEmWJSYvbcp7f0r1StfgdKEIgGATJNiQQBDswYjN5pLsHWlHIymrKoHKZVZlXWYWQMztnbz33nvvvffee++997o7nU4n99//P1xmZAFs9s5K2smeIYCqyB8/fnwfPyJOTrY+Ozk5+X3x4+7JixP63+7J3snJPfrihH69d+dk787ve3Ln5P8BI13NaCkAAAA=
1EF9BBA8525E6B10F72DAF6417E4BA11	1	cxsmiles	JChemExcelQwAAAB+LCAAAAAAABADtvQdgHEmWJSYvbcp7f0r1StfgdKEIgGATJNiQQBDswYjN5pLsHWlHIymrKoHKZVZlXWYWQMztnbz33nvvvffee++997o7nU4n99//P1xmZAFs9s5K2smeIYCqyB8/fnwfPyJOvpzuLqd70+l060l9Z4rfdr938nv+nt/+/tb03hTPvTv4+/tbX97ZOjl5sXVy5+TOdB9f3Oev9+//P3XaYIZDAAAA
4E6F686E231A309E695522894D330AA2	1	cxsmiles	JChemExcelOQAAAB+LCAAAAAAABADtvQdgHEmWJSYvbcp7f0r1StfgdKEIgGATJNiQQBDswYjN5pLsHWlHIymrKoHKZVZlXWYWQMztnbz33nvvvffee++997o7nU4n99//P1xmZAFs9s5K2smeIYCqyB8/fnwfPyJOTrZO7rz47GT35LOTvRdb03vT6XTrpLwznd67M92f4tmnr/fo690X0/v22/v/D+8z9wY5AAAA
E55AAA9D2E4835F63BBEE27281E32AE1	1	cxsmiles	JChemExcelMwAAAB+LCAAAAAAABADtvQdgHEmWJSYvbcp7f0r1StfgdKEIgGATJNiQQBDswYjN5pLsHWlHIymrKoHKZVZlXWYWQMztnbz33nvvvffee++997o7nU4n99//P1xmZAFs9s5K2smeIYCqyB8/fnwfPyJOyunulJ6t6e6d6d50ubyHP5bTvXt3TrY++/LOi+k+fzvdv/Pi/snJi5OT+/8PrVSx8TMAAAA=
B54EE9E02FE7340F7EACDFDD49F3D48D	1	cxsmiles	JChemExcelNQAAAB+LCAAAAAAABADtvQdgHEmWJSYvbcp7f0r1StfgdKEIgGATJNiQQBDswYjN5pLsHWlHIymrKoHKZVZlXWYWQMztnbz33nvvvffee++997o7nU4n99//P1xmZAFs9s5K2smeIYCqyB8/fnwfPyJOprvT5XRrOd39cro3nU63ptO9O8t7U/rw3p0X+ycnL7538nv+nt/+/tbJ9P4Uz/07J/v/D3CuYio1AAAA
54028EA177110D4E678F3EB8A4519B51	1	cxsmiles	JChemExcelLQAAAB+LCAAAAAAABADtvQdgHEmWJSYvbcp7f0r1StfgdKEIgGATJNiQQBDswYjN5pLsHWlHIymrKoHKZVZlXWYWQMztnbz33nvvvffee++997o7nU4n99//P1xmZAFs9s5K2smeIYCqyB8/fnwfPyJOTk52PzvZOrnzgv59Qb9/eWe5t5zSB9Pp3ouTLfp7em+K597rk/8H/S5HMy0AAAA=
DCCBDC36297571296FCE33906E41AF21	1	cxsmiles	JChemExcelNAAAAB+LCAAAAAAABADtvQdgHEmWJSYvbcp7f0r1StfgdKEIgGATJNiQQBDswYjN5pLsHWlHIymrKoHKZVZlXWYWQMztnbz33nvvvffee++997o7nU4n99//P1xmZAFs9s5K2smeIYCqyB8/fnwfPyJOXuyenJxsnZzs3nlxMt2b0rM13bszvce/TO/deb312Zd38H/6eh9fT/f/Hz+3rdA0AAAA
0B3309337DFA8FEA0A9C25D874FD4AC8	1	cxsmiles	JChemExcelPwAAAB+LCAAAAAAABADtvQdgHEmWJSYvbcp7f0r1StfgdKEIgGATJNiQQBDswYjN5pLsHWlHIymrKoHKZVZlXWYWQMztnbz33nvvvffee++997o7nU4n99//P1xmZAFs9s5K2smeIYCqyB8/fnwfPyJOXuyenLzYOjk5+XK6t5xOt15M7+HHcnrvZOuzL++8uDPdn9Lf061n9NudE/pB/6Pfl3t3Tk52/x9c7D4SPwAAAA==
29B017F4AA0172EEB7394BB6B718EC37	1	cxsmiles	JChemExcelLwAAAB+LCAAAAAAABADtvQdgHEmWJSYvbcp7f0r1StfgdKEIgGATJNiQQBDswYjN5pLsHWlHIymrKoHKZVZlXWYWQMztnbz33nvvvffee++997o7nU4n99//P1xmZAFs9s5K2smeIYCqyB8/fnwfPyK+nO5Op9Otk/LOdLp7svXZl3deTPfwCf23d+dk69kd+t8z+8v/A7LP2YsvAAAA
0B1F50BA5976540D2CDC674DE7A972EE	1	cxsmiles	JChemExcelMgAAAB+LCAAAAAAABADtvQdgHEmWJSYvbcp7f0r1StfgdKEIgGATJNiQQBDswYjN5pLsHWlHIymrKoHKZVZlXWYWQMztnbz33nvvvffee++997o7nU4n99//P1xmZAFs9s5K2smeIYCqyB8/fnwfPyJOTrZO7tD/tz778s6L6e50Ot2aTnfvvMbf/Bm+vjPdwxcn5Z3pdO//AZq2gr0yAAAA
B9AA83F38D768107A3D5533DD194FDAE	1	cxsmiles	JChemExcelMQAAAB+LCAAAAAAABADtvQdgHEmWJSYvbcp7f0r1StfgdKEIgGATJNiQQBDswYjN5pLsHWlHIymrKoHKZVZlXWYWQMztnbz33nvvvffee++997o7nU4n99//P1xmZAFs9s5K2smeIYCqyB8/fnwfPyK+3JruTvHs3uFftvDbNv26pN+X8ut0uve95be/j5/T3f8Hj0nfUzEAAAA=
E4D9F5356C58710D946F1F60DCA9F7B2	1	cxsmiles	JChemExcelKwAAAB+LCAAAAAAABADtvQdgHEmWJSYvbcp7f0r1StfgdKEIgGATJNiQQBDswYjN5pLsHWlHIymrKoHKZVZlXWYWQMztnbz33nvvvffee++997o7nU4n99//P1xmZAFs9s5K2smeIYCqyB8/fnwfPyKe1NPd6XI63Zru3pnu0c8XJycny3tT+uzeneV0a7l3Z7o/xbP//wB4HpPfKwAAAA==
D77E063C0F4D6589E2A7107E78BFA8FD	1	cxsmiles	JChemExcelJQAAAB+LCAAAAAAABADtvQdgHEmWJSYvbcp7f0r1StfgdKEIgGATJNiQQBDswYjN5pLsHWlHIymrKoHKZVZlXWYWQMztnbz33nvvvffee++997o7nU4n99//P1xmZAFs9s5K2smeIYCqyB8/fnwfPyJOXmydnEx3p3h270z3ltMt+t8J/XZS3pnew8fLe/8PyqJNxSUAAAA=
A89733268445CD464F8522CD0C26873E	1	cxsmiles	JChemExcelLAAAAB+LCAAAAAAABADtvQdgHEmWJSYvbcp7f0r1StfgdKEIgGATJNiQQBDswYjN5pLsHWlHIymrKoHKZVZlXWYWQMztnbz33nvvvffee++997o7nU4n99//P1xmZAFs9s5K2smeIYCqyB8/fnwfPyJOTrZO7ix3l9Ot7enedHpvunVS3pnSc+97y29/f+8Ofbj14s5yupzu7v0/01QVuywAAAA=
19CCB94615BC4B9591CE044AFB17E704	1	cxsmiles	JChemExcelLQAAAB+LCAAAAAAABADtvQdgHEmWJSYvbcp7f0r1StfgdKEIgGATJNiQQBDswYjN5pLsHWlHIymrKoHKZVZlXWYWQMztnbz33nvvvffee++997o7nU4n99//P1xmZAFs9s5K2smeIYCqyB8/fnwfPyJOlrvL6XRvurWcbr04OZnem35v+e3vT/eneO7t31lOd/fuvNg9Ofny5GT3/wGtSJ/8LQAAAA==
4EDC7E4CD0809D592734395F51647161	1	cxsmiles	JChemExcelMQAAAB+LCAAAAAAABADtvQdgHEmWJSYvbcp7f0r1StfgdKEIgGATJNiQQBDswYjN5pLsHWlHIymrKoHKZVZlXWYWQMztnbz33nvvvffee++997o7nU4n99//P1xmZAFs9s5K2smeIYCqyB8/fnwfPyJOypPdz05OPjvZ+t7J7/l7fn/r5M7WyR5/QP/bu/PlycnJvRf0KX7eoY92/x9HkupZMQAAAA==
2AFBA3AD08B1AA5162E246FB0BE8B806	1	cxsmiles	JChemExcelKQAAAB+LCAAAAAAABADtvQdgHEmWJSYvbcp7f0r1StfgdKEIgGATJNiQQBDswYjN5pLsHWlHIymrKoHKZVZlXWYWQMztnbz33nvvvffee++997o7nU4n99//P1xmZAFs9s5K2smeIYCqyB8/fnwfPyJOyunudDrdmk5377ze+uzLO/j/dK+abi2neyc//uLO9N4Uz73/B0TcInIpAAAA
C7F11EDAEB754882EF49CC014B86BFD2	1	cxsmiles	JChemExcelIwAAAB+LCAAAAAAABADtvQdgHEmWJSYvbcp7f0r1StfgdKEIgGATJNiQQBDswYjN5pLsHWlHIymrKoHKZVZlXWYWQMztnbz33nvvvffee++997o7nU4n99//P1xmZAFs9s5K2smeIYCqyB8/fnwfPyJOprtTeraWu3eme8vp1ovpvel0OV3euzPdb+iL/eXe/wPeNBy2IwAAAA==
726E79442ACA2BD058657DBCE9A2C7D3	1	cxsmiles	JChemExcelOAAAAB+LCAAAAAAABADtvQdgHEmWJSYvbcp7f0r1StfgdKEIgGATJNiQQBDswYjN5pLsHWlHIymrKoHKZVZlXWYWQMztnbz33nvvvffee++997o7nU4n99//P1xmZAFs9s5K2smeIYCqyB8/fnwfPyJOvpzuTqfTrS+ne/gxne7d+d7J7/l7fvv7Wyd3XtD/p/eW0+n+dOvFnaX8s7+8d2c63f1/AF7buno4AAAA
0A9D6800D962BE4BDEA2E152BAE70CBC	1	cxsmiles	JChemExcelLAAAAB+LCAAAAAAABADtvQdgHEmWJSYvbcp7f0r1StfgdKEIgGATJNiQQBDswYjN5pLsHWlHIymrKoHKZVZlXWYWQMztnbz33nvvvffee++997o7nU4n99//P1xmZAFs9s5K2smeIYCqyB8/fnwfPyJOtl5Md6fT6XK6e2e6R79sNXt3pvem0318hn/vfXly/+TkxcnJ/f8H2+ov8CwAAAA=
C5ED1FEE5ECDB531C3A373A9EF140A77	1	cxsmiles	JChemExcelQwAAAB+LCAAAAAAABADtvQdgHEmWJSYvbcp7f0r1StfgdKEIgGATJNiQQBDswYjN5pLsHWlHIymrKoHKZVZlXWYWQMztnbz33nvvvffee++997o7nU4n99//P1xmZAFs9s5K2smeIYCqyB8/fnwfPyJOTrZO7tD/TrY++/LOi60Tfl7snnzv5Pf89ve3vrxDP+0v7ufuyZd3Tvak8d7/A6UBIUxDAAAA
239250AC7C05AD0734EE9DC767053A28	1	cxsmiles	JChemExcelJAAAAB+LCAAAAAAABADtvQdgHEmWJSYvbcp7f0r1StfgdKEIgGATJNiQQBDswYjN5pLsHWlHIymrKoHKZVZlXWYWQMztnbz33nvvvffee++997o7nU4n99//P1xmZAFs9s5K2smeIYCqyB8/fnwfPyJOvpzuTqfTrel098uTO9O96XJ6D38vl3v37rzYP6Fn//8BE5SYPSQAAAA=
DE5641A55B02A42281AB6CE795B5DE8D	1	cxsmiles	JChemExcelUwAAAB+LCAAAAAAABADtvQdgHEmWJSYvbcp7f0r1StfgdKEIgGATJNiQQBDswYjN5pLsHWlHIymrKoHKZVZlXWYWQMztnbz33nvvvffee++997o7nU4n99//P1xmZAFs9s5K2smeIYCqyB8/fnwfPyJOTl5uffa94/X3X3/v5Pf89vd3v6Qf9HPr5MuTrc++vHNyhz/e8v7q/7lr/tw6OblzcvL/AO3O9ypTAAAA
128740AF4DB186DF396F3C9453078E21	1	cxsmiles	JChemExcelIwAAAB+LCAAAAAAABADtvQdgHEmWJSYvbcp7f0r1StfgdKEIgGATJNiQQBDswYjN5pLsHWlHIymrKoHKZVZlXWYWQMztnbz33nvvvffee++997o7nU4n99//P1xmZAFs9s5K2smeIYCqyB8/fnwfPyJOtl5Md5fTreV0b4pnd+/Oi3sneO7dme5X9Mn+/wP9BC32IwAAAA==
8204EE43B50DBD39D3A1744353028654	1	cxsmiles	JChemExcelMgAAAB+LCAAAAAAABADtvQdgHEmWJSYvbcp7f0r1StfgdKEIgGATJNiQQBDswYjN5pLsHWlHIymrKoHKZVZlXWYWQMztnbz33nvvvffee++997o7nU4n99//P1xmZAFs9s5K2smeIYCqyB8/fnwfPyJOprvT6XRrOt2983rrsy/v4P/LPXxybzpdTrde3JneuzPdpw+e1Hfog739/wchSATcMgAAAA==
FBA0711D892B4B1B8BECAC997533FFE0	1	cxsmiles	JChemExcelJQAAAB+LCAAAAAAABADtvQdgHEmWJSYvbcp7f0r1StfgdKEIgGATJNiQQBDswYjN5pLsHWlHIymrKoHKZVZlXWYWQMztnbz33nvvvffee++997o7nU4n99//P1xmZAFs9s5K2smeIYCqyB8/fnwfPyJOyunudDrdanbvnGx99uWdF9O9arq1XO7dmd7D5yflnebe/wOaZ3XTJQAAAA==
078F549B32E4ABA70174B4B1392E64BB	1	cxsmiles	JChemExcelOwAAAB+LCAAAAAAABADtvQdgHEmWJSYvbcp7f0r1StfgdKEIgGATJNiQQBDswYjN5pLsHWlHIymrKoHKZVZlXWYWQMztnbz33nvvvffee++997o7nU4n99//P1xmZAFs9s5K2smeIYCqyB8/fnwfPyJOXpxsffblnenucrl1cme6N723nG69mO5Pp9Ot6XT/zov7Jycv6JuTk/t3ltPpvZMT+gMtd/f+HwptsG87AAAA
853AA0916CA5504DD49D550370A53371	1	cxsmiles	JChemExcelOgAAAB+LCAAAAAAABADtvQdgHEmWJSYvbcp7f0r1StfgdKEIgGATJNiQQBDswYjN5pLsHWlHIymrKoHKZVZlXWYWQMztnbz33nvvvffee++997o7nU4n99//P1xmZAFs9s5K2smeIYCqyB8/fnwfPyJOTnY/O9k62frsyzvTvenWsztT+Wfvxe6d6b0p/fXldJ9/nNDn9D98uU//v/f/AJ4JchU6AAAA
AB66C64C4CAA6E71B2D65373CA52B5C5	1	cxsmiles	JChemExcelNQAAAB+LCAAAAAAABADtvQdgHEmWJSYvbcp7f0r1StfgdKEIgGATJNiQQBDswYjN5pLsHWlHIymrKoHKZVZlXWYWQMztnbz33nvvvffee++997o7nU4n99//P1xmZAFs9s5K2smeIYCqyB8/fnwfPyJOprvVcrp1cme6e7L12Zd3Xuyd0LN1sndneu97y29/f7rPX9KzP703vT+dLqfT+/8P8F0TyjUAAAA=
BF6FC74A5BDAAB1E10AEC283D8D97C9B	1	cxsmiles	JChemExcelLQAAAB+LCAAAAAAABADtvQdgHEmWJSYvbcp7f0r1StfgdKEIgGATJNiQQBDswYjN5pLsHWlHIymrKoHKZVZlXWYWQMztnbz33nvvvffee++997o7nU4n99//P1xmZAFs9s5K2smeIYCqyB8/fnwfPyJeTHen0+necrqcbr2Y3qPft748me5P8cuzO9P9O9Otk/LO9N6d6d509/8BiT1TKy0AAAA=
91036E61F0FB391D66BE9C36F5116062	1	cxsmiles	JChemExcelOwAAAB+LCAAAAAAABADtvQdgHEmWJSYvbcp7f0r1StfgdKEIgGATJNiQQBDswYjN5pLsHWlHIymrKoHKZVZlXWYWQMztnbz33nvvvffee++997o7nU4n99//P1xmZAFs9s5K2smeIYCqyB8/fnwfPyKenex+drJ1Qv9/cbL12Zd3Xuyd0LN3hz7ZvUPfvTjZ++yEvjl58dnJ3gv+6OSE/7f7/wDuldsWOwAAAA==
6E03937EE1153C7A4A64D1A7E8F4B4ED	1	cxsmiles	JChemExcelKQAAAB+LCAAAAAAABADtvQdgHEmWJSYvbcp7f0r1StfgdKEIgGATJNiQQBDswYjN5pLsHWlHIymrKoHKZVZlXWYWQMztnbz33nvvvffee++997o7nU4n99//P1xmZAFs9s5K2smeIYCqyB8/fnwfPyJOyunulJ6t6e6dk63pHn49eXHv5OTFycm9O9Pp3p3l/nS6nO7/P7HugM0pAAAA
B7B43202C073248F3D3073A66DFE94F6	1	cxsmiles	JChemExcelPQAAAB+LCAAAAAAABADtvQdgHEmWJSYvbcp7f0r1StfgdKEIgGATJNiQQBDswYjN5pLsHWlHIymrKoHKZVZlXWYWQMztnbz33nvvvffee++997o7nU4n99//P1xmZAFs9s5K2smeIYCqyB8/fnwfPyJOTna3Tu58+WTryzvTvel0ujWd7u7dObn32YsvT7ZO7t3Zmu7ThyflnenWszvyy/6dE/qd/vfs/wGHK/LdPQAAAA==
7409F6743BF44D1CF2FF759A374AA45E	1	cxsmiles	JChemExcelJAAAAB+LCAAAAAAABADtvQdgHEmWJSYvbcp7f0r1StfgdKEIgGATJNiQQBDswYjN5pLsHWlHIymrKoHKZVZlXWYWQMztnbz33nvvvffee++997o7nU4n99//P1xmZAFs9s5K2smeIYCqyB8/fnwfPyJOTra+nO5O8ezeOdn67Ms7L6Z7y+nWtNm7M72Hj5f3/h/480ehJAAAAA==
E5C47EA875DFEF877412D14B6853EADE	1	cxsmiles	JChemExcelKwAAAB+LCAAAAAAABADtvQdgHEmWJSYvbcp7f0r1StfgdKEIgGATJNiQQBDswYjN5pLsHWlHIymrKoHKZVZlXWYWQMztnbz33nvvvffee++997o7nU4n99//P1xmZAFs9s5K2smeIYCqyB8/fnwfPyJOTk5eb3325R38/8Uu/bV1Qn+cTPemePZOtp7dof89u3Nysvv/AI6FLJsrAAAA
0131CACB2BD2287FDFF9F8FCB5727C29	1	cxsmiles	JChemExcelPQAAAB+LCAAAAAAABADtvQdgHEmWJSYvbcp7f0r1StfgdKEIgGATJNiQQBDswYjN5pLsHWlHIymrKoHKZVZlXWYWQMztnbz33nvvvffee++997o7nU4n99//P1xmZAFs9s5K2smeIYCqyB8/fnwfPyKenWw9u0P/m+5Op9Ot6XT3zou9k5MXWycne3dOtj778s73Tn7P3/Pb39+a3sP3J+Wd6fTenek+/bGc7v8/EbNJWT0AAAA=
50502D0DCA2CAD8D7B8DC079FDE7095E	1	cxsmiles	JChemExcelHgAAAB+LCAAAAAAABADtvQdgHEmWJSYvbcp7f0r1StfgdKEIgGATJNiQQBDswYjN5pLsHWlHIymrKoHKZVZlXWYWQMztnbz33nvvvffee++997o7nU4n99//P1xmZAFs9s5K2smeIYCqyB8/fnwfPyJeTHeX0+l0j/6/NZ3u7t2Z3qNf9+mz5f703v8DqdVpdR4AAAA=
473F130C5A20B18D39D39BDEA9D88C1D	1	cxsmiles	JChemExcelJQAAAB+LCAAAAAAABADtvQdgHEmWJSYvbcp7f0r1StfgdKEIgGATJNiQQBDswYjN5pLsHWlHIymrKoHKZVZlXWYWQMztnbz33nvvvffee++997o7nU4n99//P1xmZAFs9s5K2smeIYCqyB8/fnwfPyJOTpa70+V0b7r1YnpvOt16dkf+uXdnOd1aTnf37pz8+Iv/BzSjKrUlAAAA
35D2F28E4C3C72CF9040C427ED97B218	1	cxsmiles	JChemExcelKgAAAB+LCAAAAAAABADtvQdgHEmWJSYvbcp7f0r1StfgdKEIgGATJNiQQBDswYjN5pLsHWlHIymrKoHKZVZlXWYWQMztnbz33nvvvffee++997o7nU4n99//P1xmZAFs9s5K2smeIYCqyB8/fnwfPyJOvpzuTunZWu7eme4tp/emW/jz3nLv5GT/5OTkxf6dF/fp58n9/wdIa9SIKgAAAA==
835EA52B76ABD83E01D0ADA8C58920A0	1	cxsmiles	JChemExcelLQAAAB+LCAAAAAAABADtvQdgHEmWJSYvbcp7f0r1StfgdKEIgGATJNiQQBDswYjN5pLsHWlHIymrKoHKZVZlXWYWQMztnbz33nvvvffee++997o7nU4n99//P1xmZAFs9s5K2smeIYCqyB8/fnwfPyK+/Oxk68V0d0rP1nT3znQPv7w4OTl5cY/+Obl3ZznduzPdx/fT/f8HW+BlEi0AAAA=
B6E8A31BC51BBEBE459CFE7ECC6B6EB8	1	cxsmiles	JChemExcelOwAAAB+LCAAAAAAABADtvQdgHEmWJSYvbcp7f0r1StfgdKEIgGATJNiQQBDswYjN5pLsHWlHIymrKoHKZVZlXWYWQMztnbz33nvvvffee++997o7nU4n99//P1xmZAFs9s5K2smeIYCqyB8/fnwfPyJOXuyenLzYOjnZvfN667Mv7+D/073pdLo1ne7dmd6j3/anWy+m95f00Ul5Z7q8f2c6XdKH9/4fsfW9SzsAAAA=
1889C61068BBF5A1658071104162EAEC	1	cxsmiles	JChemExcelOgAAAB+LCAAAAAAABADtvQdgHEmWJSYvbcp7f0r1StfgdKEIgGATJNiQQBDswYjN5pLsHWlHIymrKoHKZVZlXWYWQMztnbz33nvvvffee++997o7nU4n99//P1xmZAFs9s5K2smeIYCqyB8/fnwfPyJOTrZO7tD/vjzZ+uzLOy92T/DBcm853dqe3psup/tTPPvTe3foz60Xd5b02d69Oycnu/8Pw1ZCtToAAAA=
F186DDAC3CA1D749F6BD5DC4C813EB9D	1	cxsmiles	JChemExcelJwAAAB+LCAAAAAAABADtvQdgHEmWJSYvbcp7f0r1StfgdKEIgGATJNiQQBDswYjN5pLsHWlHIymrKoHKZVZlXWYWQMztnbz33nvvvffee++997o7nU4n99//P1xmZAFs9s5K2smeIYCqyB8/fnwfPyKenWw9u0P/m+5Op1svTk6me1M8e3eW063l7p3pPfy1vPf/ANlEzfcnAAAA
CC3DEA92648DD810BCCB53B9E540C025	1	cxsmiles	JChemExcelLQAAAB+LCAAAAAAABADtvQdgHEmWJSYvbcp7f0r1StfgdKEIgGATJNiQQBDswYjN5pLsHWlHIymrKoHKZVZlXWYWQMztnbz33nvvvffee++997o7nU4n99//P1xmZAFs9s5K2smeIYCqyB8/fnwfPyJOvpzuTqfTrel09842/bqc7tH/t6bL3T3+G999ebJ1cufkznT3/wGY5y9QLQAAAA==
5734CA8C2ADD4C52ABE7A99F39C08B83	1	cxsmiles	JChemExcelNgAAAB+LCAAAAAAABADtvQdgHEmWJSYvbcp7f0r1StfgdKEIgGATJNiQQBDswYjN5pLsHWlHIymrKoHKZVZlXWYWQMztnbz33nvvvffee++997o7nU4n99//P1xmZAFs9s5K2smeIYCqyB8/fnwfPyKenexuPbtzcvJi64SeF9O96XRreg//TKf3lnt3Tso7J1uffXnnBX25hyb00cnu/wM95RrENgAAAA==
B703055E4057D96A926E0A87FC7F3669	1	cxsmiles	JChemExcelJQAAAB+LCAAAAAAABADtvQdgHEmWJSYvbcp7f0r1StfgdKEIgGATJNiQQBDswYjN5pLsHWlHIymrKoHKZVZlXWYWQMztnbz33nvvvffee++997o7nU4n99//P1xmZAFs9s5K2smeIYCqyB8/fnwfPyK+PDmZ7k6n060X070lfi737kzvLZfTffpjury3f2c63f1/ANNSAm8lAAAA
EC8E9C292480354FC346D1373D64B544	1	cxsmiles	JChemExcelLAAAAB+LCAAAAAAABADtvQdgHEmWJSYvbcp7f0r1StfgdKEIgGATJNiQQBDswYjN5pLsHWlHIymrKoHKZVZlXWYWQMztnbz33nvvvffee++997o7nU4n99//P1xmZAFs9s5K2smeIYCqyB8/fnwfPyJO6PnyZOuzL++8mO5Op3vL6db3lt/+/nRvOt19cQ/f3rtzso+fJ/v/D0hzdIAsAAAA
F15CF1B20A9840516A73271AF7568BD2	1	cxsmiles	JChemExcelKAAAAB+LCAAAAAAABADtvQdgHEmWJSYvbcp7f0r1StfgdKEIgGATJNiQQBDswYjN5pLsHWlHIymrKoHKZVZlXWYWQMztnbz33nvvvffee++997o7nU4n99//P1xmZAFs9s5K2smeIYCqyB8/fnwfPyKenWw9u0P/m+5Ol9Ot19O9arq1XO7dmd6b0gfTe3emWyflnenu/wMoc7J+KAAAAA==
7FBFFBA08803B00B5F27FF0044A08CFE	1	cxsmiles	JChemExcelJwAAAB+LCAAAAAAABADtvQdgHEmWJSYvbcp7f0r1StfgdKEIgGATJNiQQBDswYjN5pLsHWlHIymrKoHKZVZlXWYWQMztnbz33nvvvffee++997o7nU4n99//P1xmZAFs9s5K2smeIYCqyB8/fnwfPyK+/Oxk62T3BM/unRd7Jyf3XmydnEz3p3ju7d852frsyzsne/8P/6DHtScAAAA=
2A2A48C9EF59B2DF5E66957D8D28509D	1	cxsmiles	JChemExcelZgAAAB+LCAAAAAAABADtvQdgHEmWJSYvbcp7f0r1StfgdKEIgGATJNiQQBDswYjN5pLsHWlHIymrKoHKZVZlXWYWQMztnbz33nvvvffee++997o7nU4n99//P1xmZAFs9s5K2smeIYCqyB8/fnwfPyJOTr538nv+nt/+/hb9oH9P7nx558Xui89OXmyd7H725Z3p3nQ63ZpO9+68uHeCD0/u3Znu47Mv9cX7J1/SL/Tm8tPpcrr89M7Wyf070wdo8uzOdPoA/+z/P8Sded1mAAAA
EA0D8206F790E74FBDB3B71C6197209F	1	cxsmiles	JChemExcelKgAAAB+LCAAAAAAABADtvQdgHEmWJSYvbcp7f0r1StfgdKEIgGATJNiQQBDswYjN5pLsHWlHIymrKoHKZVZlXWYWQMztnbz33nvvvffee++997o7nU4n99//P1xmZAFs9s5K2smeIYCqyB8/fnwfPyJOTrY++/LOl9PdKZ5d/uvFdG85nW41e3e+9+KT7+OT7325/f3/B75I/iAqAAAA
C87FB89EAB74CE241F9F25502982A38B	1	cxsmiles	JChemExcelNAAAAB+LCAAAAAAABADtvQdgHEmWJSYvbcp7f0r1StfgdKEIgGATJNiQQBDswYjN5pLsHWlHIymrKoHKZVZlXWYWQMztnbz33nvvvffee++997o7nU4n99//P1xmZAFs9s5K2smeIYCqyB8/fnwfPyJOprvT6XTrxcnWZ1/eme4tp99bfvv70z3+88X03nK6P8Wzj4/v3ZlundyZ7v4/OQPpqzQAAAA=
E8FCC75B7D33947E56475255573317EB	1	cxsmiles	JChemExcelKAAAAB+LCAAAAAAABADtvQdgHEmWJSYvbcp7f0r1StfgdKEIgGATJNiQQBDswYjN5pLsHWlHIymrKoHKZVZlXWYWQMztnbz33nvvvffee++997o7nU4n99//P1xmZAFs9s5K2smeIYCqyB8/fnwfPyJenGx99uWd6e50Ot2aTnfvTPeW9MtyuvfizvSefHjvzsmPv/h/APqhe6ooAAAA
48768FF59F261D720E3CD073C8665558	1	cxsmiles	JChemExcelFQAAAB+LCAAAAAAABADtvQdgHEmWJSYvbcp7f0r1StfgdKEIgGATJNiQQBDswYjN5pLsHWlHIymrKoHKZVZlXWYWQMztnbz33nvvvffee++997o7nU4n99//P1xmZAFs9s5K2smeIYCqyB8/fnwfPyK+nO5Ot87uTPmfvel0upzu7v0/WRyIxxUAAAA=
A95AF50AB245B59FD0B6AE8443E2D861	1	cxsmiles	JChemExcelMwAAAB+LCAAAAAAABADtvQdgHEmWJSYvbcp7f0r1StfgdKEIgGATJNiQQBDswYjN5pLsHWlHIymrKoHKZVZlXWYWQMztnbz33nvvvffee++997o7nU4n99//P1xmZAFs9s5K2smeIYCqyB8/fnwfPyJOTqa70+l0azrdvfN667Mv7+D/L6Z79NHJi3snJy+2Tk5Otk7u0H8n9+5Qy72T/weGNgW1MwAAAA==
40A430A0026E1AB6CDB6A8E12D9F87D4	1	cxsmiles	JChemExcelKQAAAB+LCAAAAAAABADtvQdgHEmWJSYvbcp7f0r1StfgdKEIgGATJNiQQBDswYjN5pLsHWlHIymrKoHKZVZlXWYWQMztnbz33nvvvffee++997o7nU4n99//P1xmZAFs9s5K2smeIYCqyB8/fnwfPyJOdk9ebJ2cvNi9M92bTreW31t++/t7d6b3pvTHl9P9KZ79O9Ppvf8HNaFNiikAAAA=
2E3940AEC2AA51EAA46708469C85F625	1	cxsmiles	JChemExcelQAAAAB+LCAAAAAAABADtvQdgHEmWJSYvbcp7f0r1StfgdKEIgGATJNiQQBDswYjN5pLsHWlHIymrKoHKZVZlXWYWQMztnbz33nvvvffee++997o7nU4n99//P1xmZAFs9s5K2smeIYCqyB8/fnwfPyJO6JnuTqfTrRcnW599eefFdA9/fPm9k9/z29+/h2/pN/z6YuvkznR/imf/znTr2Z3p3p3pdPf/AarHey5AAAAA
D1A972326F3C55A1F6DD7A24489C6C08	1	cxsmiles	JChemExcelIAAAAB+LCAAAAAAABADtvQdgHEmWJSYvbcp7f0r1StfgdKEIgGATJNiQQBDswYjN5pLsHWlHIymrKoHKZVZlXWYWQMztnbz33nvvvffee++997o7nU4n99//P1xmZAFs9s5K2smeIYCqyB8/fnwfPyJOTrZO7tD/prvT5XTrxcnWZ1/eme5N8ex9eafZ/X8AbBnaPiAAAAA=
31F3C7F10CC2A19F191CC1E72A9CA983	1	cxsmiles	JChemExcelLgAAAB+LCAAAAAAABADtvQdgHEmWJSYvbcp7f0r1StfgdKEIgGATJNiQQBDswYjN5pLsHWlHIymrKoHKZVZlXWYWQMztnbz33nvvvffee++997o7nU4n99//P1xmZAFs9s5K2smeIYCqyB8/fnwfPyJOprvL6Rb978XJyXRvOp1uTad7d15vffblHfz/5M5096S8M71H30yX9/4ftHB1GS4AAAA=
CEFDD86F4A5404981CCE4375A0AB29AC	1	cxsmiles	JChemExcelJQAAAB+LCAAAAAAABADtvQdgHEmWJSYvbcp7f0r1StfgdKEIgGATJNiQQBDswYjN5pLsHWlHIymrKoHKZVZlXWYWQMztnbz33nvvvffee++997o7nU4n99//P1xmZAFs9s5K2smeIYCqyB8/fnwfPyJOTr6c7k6n063pdPfOdG853Tp5cXIyvYePnt2ZTu/dmTZ7/w9Qx2Q0JQAAAA==
73864E92901126CDF6EAFE77EA264576	1	cxsmiles	JChemExcelIQAAAB+LCAAAAAAABADtvQdgHEmWJSYvbcp7f0r1StfgdKEIgGATJNiQQBDswYjN5pLsHWlHIymrKoHKZVZlXWYWQMztnbz33nvvvffee++997o7nU4n99//P1xmZAFs9s5K2smeIYCqyB8/fnwfPyJOprvT6dbJneV0a7l7Z7m3xB/T6d6L6b0pnnv/Dy2qVdQhAAAA
8F57F455D03574065C862C97334A2A99	1	cxsmiles	JChemExcelLgAAAB+LCAAAAAAABADtvQdgHEmWJSYvbcp7f0r1StfgdKEIgGATJNiQQBDswYjN5pLsHWlHIymrKoHKZVZlXWYWQMztnbz33nvvvffee++997o7nU4n99//P1xmZAFs9s5K2smeIYCqyB8/fnwfPyK+/Oxk68V0d4pn9850j35sNXt3pvem0/3pdMn/3vvy5P7JyYuTk/v/D3sQXH8uAAAA
47E59C273C8981B4DE1FFD1F5A047508	1	cxsmiles	JChemExcelJAAAAB+LCAAAAAAABADtvQdgHEmWJSYvbcp7f0r1StfgdKEIgGATJNiQQBDswYjN5pLsHWlHIymrKoHKZVZlXWYWQMztnbz33nvvvffee++997o7nU4n99//P1xmZAFs9s5K2smeIYCqyB8/fnwfPyJOXmyd3JnuTqdbL062Pvvyzovp3hTP3p3pPf7l3nL3/wEWfXR5JAAAAA==
F31275849429BA6FA00843BDB9472942	1	cxsmiles	JChemExcelKAAAAB+LCAAAAAAABADtvQdgHEmWJSYvbcp7f0r1StfgdKEIgGATJNiQQBDswYjN5pLsHWlHIymrKoHKZVZlXWYWQMztnbz33nvvvffee++997o7nU4n99//P1xmZAFs9s5K2smeIYCqyB8/fnwfPyJOXuyenLzYOjnZvTPdW06n03vfW377+9Ot6XTv3p3pPn0w3Xp2Z7r//wBvZWNRKAAAAA==
176BA1711D9594D1021477194F1AC69C	1	cxsmiles	JChemExcelRQAAAB+LCAAAAAAABADtvQdgHEmWJSYvbcp7f0r1StfgdKEIgGATJNiQQBDswYjN5pLsHWlHIymrKoHKZVZlXWYWQMztnbz33nvvvffee++997o7nU4n99//P1xmZAFs9s5K2smeIYCqyB8/fnwfPyJOyunudDrdmk5373zv5Pf8Pb/9/T368e3vb305vTfFc+/OydZnX955sXdystyfLqf3p1svTqaf8nef3lnSJ/v3/x+cuF7MRQAAAA==
DC8053192D9BDC4CA7D2B96D4229DF0F	1	cxsmiles	JChemExcelGgAAAB+LCAAAAAAABADtvQdgHEmWJSYvbcp7f0r1StfgdKEIgGATJNiQQBDswYjN5pLsHWlHIymrKoHKZVZlXWYWQMztnbz33nvvvffee++997o7nU4n99//P1xmZAFs9s5K2smeIYCqyB8/fnwfPyJeTHeneyf0TPeW03vNdJ9/35/u3vt/AHxxJIwaAAAA
4E7D92F159011A80C1752B40C1ECAEE7	1	cxsmiles	JChemExcelIgAAAB+LCAAAAAAABADtvQdgHEmWJSYvbcp7f0r1StfgdKEIgGATJNiQQBDswYjN5pLsHWlHIymrKoHKZVZlXWYWQMztnbz33nvvvffee++997o7nU4n99//P1xmZAFs9s5K2smeIYCqyB8/fnwfPyJeTHeX0+V073vLb39/Od06md6b0rOPf6b39u9Md/f+H7DGEoEiAAAA
99CA38E2A11DA21FA28A37D25161AB28	1	cxsmiles	JChemExcelGAAAAB+LCAAAAAAABADtvQdgHEmWJSYvbcp7f0r1StfgdKEIgGATJNiQQBDswYjN5pLsHWlHIymrKoHKZVZlXWYWQMztnbz33nvvvffee++997o7nU4n99//P1xmZAFs9s5K2smeIYCqyB8/fnwfPyJOypPdz05Otl58Rv+/8+Xenc9O9k4+O9n9fwA1WLmjGAAAAA==
FB9B7C7C56D416CE163AF81AC053DA4B	1	cxsmiles	JChemExcelVQAAAB+LCAAAAAAABADtvQdgHEmWJSYvbcp7f0r1StfgdKEIgGATJNiQQBDswYjN5pLsHWlHIymrKoHKZVZlXWYWQMztnbz33nvvvffee++997o7nU4n99//P1xmZAFs9s5K2smeIYCqyB8/fnwfPyJOvjzZ/exk68sTer482fvs5IT+Orn32YsXLz57ce8O/bV3hz/a+t7J7/l7fvv7+/Tj29+/j2Yn+3eo2dbJpyf8fHrn5P5nX6Lx7v8DPzFP7lUAAAA=
D7FFD67069D81E68BDAE44FED539F243	1	cxsmiles	JChemExcelNwAAAB+LCAAAAAAABADtvQdgHEmWJSYvbcp7f0r1StfgdKEIgGATJNiQQBDswYjN5pLsHWlHIymrKoHKZVZlXWYWQMztnbz33nvvvffee++997o7nU4n99//P1xmZAFs9s5K2smeIYCqyB8/fnwfPyJOprvT6XRrOt2983rrsy/v4P8v9k5OXmydnOzdOcGf03vU4HvLb39/ee/OdH+KZ///AbetDIE3AAAA
73AC40A32AD3AD70F984BC312D2A8BE8	1	cxsmiles	JChemExcelLAAAAB+LCAAAAAAABADtvQdgHEmWJSYvbcp7f0r1StfgdKEIgGATJNiQQBDswYjN5pLsHWlHIymrKoHKZVZlXWYWQMztnbz33nvvvffee++997o7nU4n99//P1xmZAFs9s5K2smeIYCqyB8/fnwfPyJOyunulJ6tky+/d/J7fvv7eycn03v4YHqP/sYHy/3pdLncvzPd/X8Abd64UCwAAAA=
061013A2AA7FC2171512C5163E103E8A	1	cxsmiles	JChemExcelLgAAAB+LCAAAAAAABADtvQdgHEmWJSYvbcp7f0r1StfgdKEIgGATJNiQQBDswYjN5pLsHWlHIymrKoHKZVZlXWYWQMztnbz33nvvvffee++997o7nU4n99//P1xmZAFs9s5K2smeIYCqyB8/fnwfPyJenJxsffblnRe7JyfLvenWye6d5XRruvdiem86ne5/efLldH967870/hTP/f8HziqUWS4AAAA=
E46E6483E9B2C3F5DD4ADCD78BFFD41F	1	cxsmiles	JChemExcelLgAAAB+LCAAAAAAABADtvQdgHEmWJSYvbcp7f0r1StfgdKEIgGATJNiQQBDswYjN5pLsHWlHIymrKoHKZVZlXWYWQMztnbz33nvvvffee++997o7nU4n99//P1xmZAFs9s5K2smeIYCqyB8/fnwfPyJOTnY/ezHdm06nWyflnel072TryztbL3ZPTl7cO8Fz7850n7+lL/f/H6amQvYuAAAA
77B316B8883485025D0D0026700EC423	1	cxsmiles	JChemExcelKgAAAB+LCAAAAAAABADtvQdgHEmWJSYvbcp7f0r1StfgdKEIgGATJNiQQBDswYjN5pLsHWlHIymrKoHKZVZlXWYWQMztnbz33nvvvffee++997o7nU4n99//P1xmZAFs9s5K2smeIYCqyB8/fnwfPyJOvpzuTvHsnrw42frsyzvTvel0azm9Rz+Xy3snWyd36L/9k5P9/wfyRx0wKgAAAA==
19951D6468E215529B4CAB8FE2EC5D87	1	cxsmiles	JChemExcelNgAAAB+LCAAAAAAABADtvQdgHEmWJSYvbcp7f0r1StfgdKEIgGATJNiQQBDswYjN5pLsHWlHIymrKoHKZVZlXWYWQMztnbz33nvvvffee++997o7nU4n99//P1xmZAFs9s5K2smeIYCqyB8/fnwfPyJOvjzZ+uzLO9Pd6d7JyYutk+m9KZ57d06me8109wV/e7L/2cn0Pn9x/0v648v/B5tWwHM2AAAA
ECF07D284077EAF8C95B5C5912E592F2	1	cxsmiles	JChemExcelLgAAAB+LCAAAAAAABADtvQdgHEmWJSYvbcp7f0r1StfgdKEIgGATJNiQQBDswYjN5pLsHWlHIymrKoHKZVZlXWYWQMztnbz33nvvvffee++997o7nU4n99//P1xmZAFs9s5K2smeIYCqyB8/fnwfPyJOprvT6XRrOt29s41ft6Z7/Od0b7l750l952Trsy/vvOBGy+nu/wN5+CzdLgAAAA==
C4B4E629DA2822C4EE3293F158C1FC43	1	cxsmiles	JChemExcelLwAAAB+LCAAAAAAABADtvQdgHEmWJSYvbcp7f0r1StfgdKEIgGATJNiQQBDswYjN5pLsHWlHIymrKoHKZVZlXWYWQMztnbz33nvvvffee++997o7nU4n99//P1xmZAFs9s5K2smeIYCqyB8/fnwfPyJOvpzuTunZ+vLkznT3ZOuzL++8mO7hg5PyznRrundnem853UeT6X5z7/8BDThXwy8AAAA=
92CCEFD9A88F700077C8C11A60E02627	1	cxsmiles	JChemExcelKgAAAB+LCAAAAAAABADtvQdgHEmWJSYvbcp7f0r1StfgdKEIgGATJNiQQBDswYjN5pLsHWlHIymrKoHKZVZlXWYWQMztnbz33nvvvffee++997o7nU4n99//P1xmZAFs9s5K2smeIYCqyB8/fnwfPyK+/Oxk6+TkZPcEz+6dF9O9KT1b070703vVdGu5vHdnul/RR/v/DyPGdgMqAAAA
9DDABB7C7CB02412DC0E86C0792A0D9A	1	cxsmiles	JChemExcelJQAAAB+LCAAAAAAABADtvQdgHEmWJSYvbcp7f0r1StfgdKEIgGATJNiQQBDswYjN5pLsHWlHIymrKoHKZVZlXWYWQMztnbz33nvvvffee++997o7nU4n99//P1xmZAFs9s5K2smeIYCqyB8/fnwfPyJOprvT6XRvOd06uTPdmt6bTpdbJ9P9KZ79O8t7d5Z7093/B9355wQlAAAA
6CA7D790EE217985C3A0211B97050C7E	1	cxsmiles	JChemExcelKQAAAB+LCAAAAAAABADtvQdgHEmWJSYvbcp7f0r1StfgdKEIgGATJNiQQBDswYjN5pLsHWlHIymrKoHKZVZlXWYWQMztnbz33nvvvffee++997o7nU4n99//P1xmZAFs9s5K2smeIYCqyB8/fnwfPyJOprvL6Rb978XeycnJ1sn03hTPvTsne3emuyflnek+/l7u/z8kc2OFKQAAAA==
3766CA0E3432AEF15C566D551059FBA6	1	cxsmiles	JChemExcelLQAAAB+LCAAAAAAABADtvQdgHEmWJSYvbcp7f0r1StfgdKEIgGATJNiQQBDswYjN5pLsHWlHIymrKoHKZVZlXWYWQMztnbz33nvvvffee++997o7nU4n99//P1xmZAFs9s5K2smeIYCqyB8/fnwfPyJOTqa7y+XWyZ3p1snWZ1/eeXEy3ZtOp1tfTu/hB30+vUf/37sz3T0p/x9NlYXkLQAAAA==
E5D22D3BC79CE2D15830B3B8120E9F9F	1	cxsmiles	JChemExcelLwAAAB+LCAAAAAAABADtvQdgHEmWJSYvbcp7f0r1StfgdKEIgGATJNiQQBDswYjN5pLsHWlHIymrKoHKZVZlXWYWQMztnbz33nvvvffee++997o7nU4n99//P1xmZAFs9s5K2smeIYCqyB8/fnwfPyKenWw9u0P/m+5O6dma7t452frsyzsvTvZOTl5snezdmd6bTpfTfXw7vbf//wD9qv2RLwAAAA==
83578530A72D044D00EE58E3D3456AE8	1	cxsmiles	JChemExcelHQAAAB+LCAAAAAAABADtvQdgHEmWJSYvbcp7f0r1StfgdKEIgGATJNiQQBDswYjN5pLsHWlHIymrKoHKZVZlXWYWQMztnbz33nvvvffee++997o7nU4n99//P1xmZAFs9s5K2smeIYCqyB8/fnwfPyJenJxsTXen02mze+f11mdf3sH/p3tTPHv/Dxjlm+sdAAAA
E645C8713666428F49E5FE9508200CB0	1	cxsmiles	JChemExcelOAAAAB+LCAAAAAAABADtvQdgHEmWJSYvbcp7f0r1StfgdKEIgGATJNiQQBDswYjN5pLsHWlHIymrKoHKZVZlXWYWQMztnbz33nvvvffee++997o7nU4n99//P1xmZAFs9s5K2smeIYCqyB8/fnwfPyJOXpxsffblnZPdk+nedOt7y29/f3pvOt06Ke9Mp9O9e3dO9rdOTl7Q/6f3p3ju3zk52b/zYvf/AVt1LfU4AAAA
49CC9E4CA8A4A31517CC2043497B4D9A	1	cxsmiles	JChemExcelLQAAAB+LCAAAAAAABADtvQdgHEmWJSYvbcp7f0r1StfgdKEIgGATJNiQQBDswYjN5pLsHWlHIymrKoHKZVZlXWYWQMztnbz33nvvvffee++997o7nU4n99//P1xmZAFs9s5K2smeIYCqyB8/fnwfPyJOTnZPvjzZOlnuTZfT5d6drS9370zvTafTrS+n+/hxUt6ZTvfp//dOyv8H1jJu0S0AAAA=
CFFF6BD32270D05A6B410AA3A7C4B4B2	1	cxsmiles	JChemExcelJgAAAB+LCAAAAAAABADtvQdgHEmWJSYvbcp7f0r1StfgdKEIgGATJNiQQBDswYjN5pLsHWlHIymrKoHKZVZlXWYWQMztnbz33nvvvffee++997o7nU4n99//P1xmZAFs9s5K2smeIYCqyB8/fnwfPyJOTk6Wu9OtFydbn315Z7o3nU7vTfHcW+7dWU73+ffd/f8HUstuiiYAAAA=
F5117C23CDA81291434746BA5C2606A6	1	cxsmiles	JChemExcelKQAAAB+LCAAAAAAABADtvQdgHEmWJSYvbcp7f0r1StfgdKEIgGATJNiQQBDswYjN5pLsHWlHIymrKoHKZVZlXWYWQMztnbz33nvvvffee++997o7nU4n99//P1xmZAFs9s5K2smeIYCqyB8/fnwfPyJeTHeX073pdLo1ne59b/nt7+/emd6bLunvL6f7+PjZnel0/8703v8DCm5bKykAAAA=
62DBB0F43C5B557ED57A8BC42D51C90E	1	cxsmiles	JChemExcelLAAAAB+LCAAAAAAABADtvQdgHEmWJSYvbcp7f0r1StfgdKEIgGATJNiQQBDswYjN5pLsHWlHIymrKoHKZVZlXWYWQMztnbz33nvvvffee++997o7nU4n99//P1xmZAFs9s5K2smeIYCqyB8/fnwfPyJOvpzuTqfTrenWl3emu3eme9WS/tib3sOHJ+Wd6fTenZOtZ3fof8/+H7amfowsAAAA
C3AF58641F0F85BAE4D7CB47D2464869	1	cxsmiles	JChemExcelSAAAAB+LCAAAAAAABADtvQdgHEmWJSYvbcp7f0r1StfgdKEIgGATJNiQQBDswYjN5pLsHWlHIymrKoHKZVZlXWYWQMztnbz33nvvvffee++997o7nU4n99//P1xmZAFs9s5K2smeIYCqyB8/fnwfPyJOvjzZ/exk68sTer482fvs5IT+Orn32YsXLz57ce8O/bV3hz/ap4+2Tu6f8HP/Dj7ZOrlzcuezL/H97v8D/tpQJkgAAAA=
C4F0529DFEDC7BB3AF958375E18E5EDB	1	cxsmiles	JChemExcelLQAAAB+LCAAAAAAABADtvQdgHEmWJSYvbcp7f0r1StfgdKEIgGATJNiQQBDswYjN5pLsHWlHIymrKoHKZVZlXWYWQMztnbz33nvvvffee++997o7nU4n99//P1xmZAFs9s5K2smeIYCqyB8/fnwfPyJOvpzuTqdb0+ke/VtNd/fuTO9N+YN7d072P3txcvJi/87Jff7l/v8DKzLtAS0AAAA=
ECAB7F05A2550366AC230FBDD4564103	1	cxsmiles	JChemExcelIgAAAB+LCAAAAAAABADtvQdgHEmWJSYvbcp7f0r1StfgdKEIgGATJNiQQBDswYjN5pLsHWlHIymrKoHKZVZlXWYWQMztnbz33nvvvffee++997o7nU4n99//P1xmZAFs9s5K2smeIYCqyB8/fnwfPyJOXpycnGx9Od2dTqdb0+nunZOtZ3fof8/uTPemePb+H2WgH1wiAAAA
B11FEA0194EC28E1DDAAA312C83559FD	1	cxsmiles	JChemExcelLgAAAB+LCAAAAAAABADtvQdgHEmWJSYvbcp7f0r1StfgdKEIgGATJNiQQBDswYjN5pLsHWlHIymrKoHKZVZlXWYWQMztnbz33nvvvffee++997o7nU4n99//P1xmZAFs9s5K2smeIYCqyB8/fnwfPyJOvpzuTqfTrel098uTO9vT3eVyuscfLHf38PeU/9i9c7J1cufk/wHCwsLRLgAAAA==
AC390CE13FA932DDC6874E03542EC448	1	cxsmiles	JChemExcelLwAAAB+LCAAAAAAABADtvQdgHEmWJSYvbcp7f0r1StfgdKEIgGATJNiQQBDswYjN5pLsHWlHIymrKoHKZVZlXWYWQMztnbz33nvvvffee++997o7nU4n99//P1xmZAFs9s5K2smeIYCqyB8/fnwfPyJOvnfye/6e3/7+1outkzvT3eV0ujfdenFnKf/sLXfvTO9Np9P9E3qm+9N7/w8fomvwLwAAAA==
0F95AEAF7D655B0E214A0F8DA7C3EF1F	1	cxsmiles	JChemExcelIgAAAB+LCAAAAAAABADtvQdgHEmWJSYvbcp7f0r1StfgdKEIgGATJNiQQBDswYjN5pLsHWlHIymrKoHKZVZlXWYWQMztnbz33nvvvffee++997o7nU4n99//P1xmZAFs9s5K2smeIYCqyB8/fnwfPyJOdk9OXmydnOzeme5Np1vL6b0pnr17d6b7+GW5//8ATAvJsiIAAAA=
B1E071F173D31C453D75AB1E1DEA099F	1	cxsmiles	JChemExcelMQAAAB+LCAAAAAAABADtvQdgHEmWJSYvbcp7f0r1StfgdKEIgGATJNiQQBDswYjN5pLsHWlHIymrKoHKZVZlXWYWQMztnbz33nvvvffee++997o7nU4n99//P1xmZAFs9s5K2smeIYCqyB8/fnwfPyJenJy82DrZ+uzLO9Pd6XS6dVLemU538e8e/vzyZHrPfnyP/r/3/wArPCcOMQAAAA==
01B322D6A09FD96B621C426CCAEC2CD2	1	cxsmiles	JChemExcelMAAAAB+LCAAAAAAABADtvQdgHEmWJSYvbcp7f0r1StfgdKEIgGATJNiQQBDswYjN5pLsHWlHIymrKoHKZVZlXWYWQMztnbz33nvvvffee++997o7nU4n99//P1xmZAFs9s5K2smeIYCqyB8/fnwfPyK+/Oxk92Tr5GTv5IR+bJ3cof/Rfyd7dz7jv+/h+89O6H/37nz25Z0v/x9IwHLvMAAAAA==
B44014B2717E6A2ABF9CD4EDD7E7480B	1	cxsmiles	JChemExcelMQAAAB+LCAAAAAAABADtvQdgHEmWJSYvbcp7f0r1StfgdKEIgGATJNiQQBDswYjN5pLsHWlHIymrKoHKZVZlXWYWQMztnbz33nvvvffee++997o7nU4n99//P1xmZAFs9s5K2smeIYCqyB8/fnwfPyKenWw9u0P/m+4up1vVdPdk67Mv77yY7k2n063ldO/Oi3snJy9OTu7dme5P8ez/PweB0jQxAAAA
7ED37FF230678483813E180100503875	1	cxsmiles	JChemExcelJAAAAB+LCAAAAAAABADtvQdgHEmWJSYvbcp7f0r1StfgdKEIgGATJNiQQBDswYjN5pLsHWlHIymrKoHKZVZlXWYWQMztnbz33nvvvffee++997o7nU4n99//P1xmZAFs9s5K2smeIYCqyB8/fnwfPyJOdk9OTrZOTnbvvJjuTadbS/rf3p3pvSk9y3t3TvZPTvb/H/mQQ0UkAAAA
AFCDF9FB919D97FE69711D6CBEED8E59	1	cxsmiles	JChemExcelIQAAAB+LCAAAAAAABADtvQdgHEmWJSYvbcp7f0r1StfgdKEIgGATJNiQQBDswYjN5pLsHWlHIymrKoHKZVZlXWYWQMztnbz33nvvvffee++997o7nU4n99//P1xmZAFs9s5K2smeIYCqyB8/fnwfPyJOyunuFM/uyeuT6V413ZpO9+6cbH325Z0XJ/dOTu79P/U+2SYhAAAA
576CD10A8797676B2BC76E649A444443	1	cxsmiles	JChemExcelKQAAAB+LCAAAAAAABADtvQdgHEmWJSYvbcp7f0r1StfgdKEIgGATJNiQQBDswYjN5pLsHWlHIymrKoHKZVZlXWYWQMztnbz33nvvvffee++997o7nU4n99//P1xmZAFs9s5K2smeIYCqyB8/fnwfPyJOTl5vffblHfz/xdbJdLeaTqe7d06me9PpPfp16+QO/bKc7n35/wDYxlgnKQAAAA==
A9DCDBB24ABB653D16D262C6C2CACC06	1	cxsmiles	JChemExcelNwAAAB+LCAAAAAAABADtvQdgHEmWJSYvbcp7f0r1StfgdKEIgGATJNiQQBDswYjN5pLsHWlHIymrKoHKZVZlXWYWQMztnbz33nvvvffee++997o7nU4n99//P1xmZAFs9s5K2smeIYCqyB8/fnwfPyJOTrZO7ix3l9Pp3nRrOt1aTnf37kzvTfHcu3Oy9dmXd15Qmxf7Jydfnpzs35nepy+a+/8PwNUx5DcAAAA=
5AFE346CEF639C79D42A813E6F29B195	1	cxsmiles	JChemExcelTwAAAB+LCAAAAAAABADtvQdgHEmWJSYvbcp7f0r1StfgdKEIgGATJNiQQBDswYjN5pLsHWlHIymrKoHKZVZlXWYWQMztnbz33nvvvffee++997o7nU4n99//P1xmZAFs9s5K2smeIYCqyB8/fnwfPyJOprvT6dZ0Ot092frsyzsvTqZ79Me9J1tf3vnyZOvkDv1vem+6d+dk/7MX+GD/ztb0Pr1xUt6Zbj27I7/cv3NCv9P/nv0/mqdFa08AAAA=
3090BDC7E33DE5CA6DBBD4B41591E08E	1	cxsmiles	JChemExcelMQAAAB+LCAAAAAAABADtvQdgHEmWJSYvbcp7f0r1StfgdKEIgGATJNiQQBDswYjN5pLsHWlHIymrKoHKZVZlXWYWQMztnbz33nvvvffee++997o7nU4n99//P1xmZAFs9s5K2smeIYCqyB8/fnwfPyJOTr6c7k6n073pdIt/7N6Z3lsut05O9k9OXmyd3KFf7kzvL6fL6dYL+ur+/wMBKmAhMQAAAA==
005423D76BD39C7A3751EA7AE7DAF57E	1	cxsmiles	JChemExcelKgAAAB+LCAAAAAAABADtvQdgHEmWJSYvbcp7f0r1StfgdKEIgGATJNiQQBDswYjN5pLsHWlHIymrKoHKZVZlXWYWQMztnbz33nvvvffee++997o7nU4n99//P1xmZAFs9s5K2smeIYCqyB8/fnwfPyJOyunulJ69Zrq1nO7u3XmxdXJysrw3nS6n9+6cbH325Z3pfkUN9v8fDdwcvSoAAAA=
A1D3CE2E6B8224235AF77B0E6CFA0D99	1	cxsmiles	JChemExcelKAAAAB+LCAAAAAAABADtvQdgHEmWJSYvbcp7f0r1StfgdKEIgGATJNiQQBDswYjN5pLsHWlHIymrKoHKZVZlXWYWQMztnbz33nvvvffee++997o7nU4n99//P1xmZAFs9s5K2smeIYCqyB8/fnwfPyJOvpzuTpfT6dZ09850j39b7t15ce/k5MXWycm9O9P9KT7c/38AtzeVYigAAAA=
D8704E1A317C18B9526A3E8C88DFF8EA	1	cxsmiles	JChemExcelJwAAAB+LCAAAAAAABADtvQdgHEmWJSYvbcp7f0r1StfgdKEIgGATJNiQQBDswYjN5pLsHWlHIymrKoHKZVZlXWYWQMztnbz33nvvvffee++997o7nU4n99//P1xmZAFs9s5K2smeIYCqyB8/fnwfPyJOvpzuTqfTrel0987J3tYJPXt3TrY++/LOi+k9fPGkvjOd3vt/AAxJf5knAAAA
89C6CCEF3B95EB36A77D9AE6AEB35F41	1	cxsmiles	JChemExcelKgAAAB+LCAAAAAAABADtvQdgHEmWJSYvbcp7f0r1StfgdKEIgGATJNiQQBDswYjN5pLsHWlHIymrKoHKZVZlXWYWQMztnbz33nvvvffee++997o7nU4n99//P1xmZAFs9s5K2smeIYCqyB8/fnwfPyJOprvVdOvFydZnX96Z7k2XW0v6994Uz72TO9N9/m3/znK5+/8AS1Qo9ioAAAA=
AB6715E78904180FA3D5866876D815BA	1	cxsmiles	JChemExcelKQAAAB+LCAAAAAAABADtvQdgHEmWJSYvbcp7f0r1StfgdKEIgGATJNiQQBDswYjN5pLsHWlHIymrKoHKZVZlXWYWQMztnbz33nvvvffee++997o7nU4n99//P1xmZAFs9s5K2smeIYCqyB8/fnwfPyJOTrZO7tD/lrvL6dbJdG9Kzz38M927d2e6P916cWc5XU539/8feTZS9ikAAAA=
92413F9EAA8DC7AD4D31DA7CCE93F156	1	cxsmiles	JChemExcelOAAAAB+LCAAAAAAABADtvQdgHEmWJSYvbcp7f0r1StfgdKEIgGATJNiQQBDswYjN5pLsHWlHIymrKoHKZVZlXWYWQMztnbz33nvvvffee++997o7nU4n99//P1xmZAFs9s5K2smeIYCqyB8/fnwfPyJOvjzZ+uzLO9Pd6XS69ezOdLr74jU+4A/3pvh0undnem+6XG6dTPfxwXT/zvTe/wNLogugOAAAAA==
D62818B901F7BEA7DAE28D31C38270C4	1	cxsmiles	JChemExcelLwAAAB+LCAAAAAAABADtvQdgHEmWJSYvbcp7f0r1StfgdKEIgGATJNiQQBDswYjN5pLsHWlHIymrKoHKZVZlXWYWQMztnbz33nvvvffee++997o7nU4n99//P1xmZAFs9s5K2smeIYCqyB8/fnwfPyJOprvT6XTry+kefrw42frsyzsnL6b3pnjuvdg/oWefPptO9+j/u/8PgznEMi8AAAA=
AC4F0E01DEBDFDDD41054251E0A6CC52	1	cxsmiles	JChemExcelIQAAAB+LCAAAAAAABADtvQdgHEmWJSYvbcp7f0r1StfgdKEIgGATJNiQQBDswYjN5pLsHWlHIymrKoHKZVZlXWYWQMztnbz33nvvvffee++997o7nU4n99//P1xmZAFs9s5K2smeIYCqyB8/fnwfPyJOXmyd3Dk5eTHdXU6X073pvemUPphOp/e+t/z296e7e/8Pov/m0iEAAAA=
FB0641FEC022114D13A881BA6C068F16	1	cxsmiles	JChemExcelNgAAAB+LCAAAAAAABADtvQdgHEmWJSYvbcp7f0r1StfgdKEIgGATJNiQQBDswYjN5pLsHWlHIymrKoHKZVZlXWYWQMztnbz33nvvvffee++997o7nU4n99//P1xmZAFs9s5K2smeIYCqyB8/fnwfPyJOXm999uUd/P/F7snJydbJcm853TqZ3pvSs49/pvf270zvT7de3FlOl9O9+3dOTnb/H1J1xAk2AAAA
6001D80A5F629C386322F88CF8FC84D5	1	cxsmiles	JChemExcelOwAAAB+LCAAAAAAABADtvQdgHEmWJSYvbcp7f0r1StfgdKEIgGATJNiQQBDswYjN5pLsHWlHIymrKoHKZVZlXWYWQMztnbz33nvvvffee++997o7nU4n99//P1xmZAFs9s5K2smeIYCqyB8/fnwfPyJOTqa7Uzy7y73p1smd6fLedP9k67Mv77zYOsF/d+g//Pml/nyBRvvL6d69/wel7/+kOwAAAA==
5142BF5E909AB8E98894DE64D5BD7900	1	cxsmiles	JChemExcelLwAAAB+LCAAAAAAABADtvQdgHEmWJSYvbcp7f0r1StfgdKEIgGATJNiQQBDswYjN5pLsHWlHIymrKoHKZVZlXWYWQMztnbz33nvvvffee++997o7nU4n99//P1xmZAFs9s5K2smeIYCqyB8/fnwfPyJOTr6c7k6n063pdPfOdG853XpxsvXZl3dOXuNf/H96b4rn3p1munfy/wCU2hl7LwAAAA==
B61BB7CA999CC0C65AD950713FD03E97	1	cxsmiles	JChemExcelKQAAAB+LCAAAAAAABADtvQdgHEmWJSYvbcp7f0r1StfgdKEIgGATJNiQQBDswYjN5pLsHWlHIymrKoHKZVZlXWYWQMztnbz33nvvvffee++997o7nU4n99//P1xmZAFs9s5K2smeIYCqyB8/fnwfPyJOTr6c7k7x7J5sffblnRfTPfyxNd27M723nO4v6Y/l/vTeyf8DB80peCkAAAA=
DC6D6574F55C290C92E5079D13D45CB3	1	cxsmiles	JChemExcelKAAAAB+LCAAAAAAABADtvQdgHEmWJSYvbcp7f0r1StfgdKEIgGATJNiQQBDswYjN5pLsHWlHIymrKoHKZVZlXWYWQMztnbz33nvvvffee++997o7nU4n99//P1xmZAFs9s5K2smeIYCqyB8/fnwfPyK+PDl5Md2dTqdb0+nunZOtz768c7J38r2T3/Pb39+b3sPnJ+Wd6fTe/wNCOs2jKAAAAA==
9EFFDA3933A812E61915E8E06E8AA21D	1	cxsmiles	JChemExcelKwAAAB+LCAAAAAAABADtvQdgHEmWJSYvbcp7f0r1StfgdKEIgGATJNiQQBDswYjN5pLsHWlHIymrKoHKZVZlXWYWQMztnbz33nvvvffee++997o7nU4n99//P1xmZAFs9s5K2smeIYCqyB8/fnwfPyJOTnZPXm999uUd/P/k5MXu7/vis5Pfd7pXTbem070733vxyffxzfe+3P7+/wOlQrNnKwAAAA==
CB764B58FB38E633E6CD349F71AC0C4D	1	cxsmiles	JChemExcelHgAAAB+LCAAAAAAABADtvQdgHEmWJSYvbcp7f0r1StfgdKEIgGATJNiQQBDswYjN5pLsHWlHIymrKoHKZVZlXWYWQMztnbz33nvvvffee++997o7nU4n99//P1xmZAFs9s5K2smeIYCqyB8/fnwfPyJenGx99uWd6e50uvWkvjOdTne/PDn5cro3xbP3/wDhM0WcHgAAAA==
78CD5B893A95E0163CE3635A6D1FA0A7	1	cxsmiles	JChemExcelNwAAAB+LCAAAAAAABADtvQdgHEmWJSYvbcp7f0r1StfgdKEIgGATJNiQQBDswYjN5pLsHWlHIymrKoHKZVZlXWYWQMztnbz33nvvvffee++997o7nU4n99//P1xmZAFs9s5K2smeIYCqyB8/fnwfPyK+PPneye/57e/vnrzYOtn67Ms7X+7eme5Np1vP7ky3Tu59doLPp/tTPPt3Tk7u3eGv9v4fRCalIDcAAAA=
3A3487A867807EC0D7050C6D17813A72	1	cxsmiles	JChemExcelLwAAAB+LCAAAAAAABADtvQdgHEmWJSYvbcp7f0r1StfgdKEIgGATJNiQQBDswYjN5pLsHWlHIymrKoHKZVZlXWYWQMztnbz33nvvvffee++997o7nU4n99//P1xmZAFs9s5K2smeIYCqyB8/fnwfPyJO6HmxhX/vTHenW1P8b/fkx1/ceb312Zd38P8X070pnr07Jz/+4v8BC5IXHC8AAAA=
4E6CDECDD679BDA3CCAB58422E8A2A56	1	cxsmiles	JChemExcelKQAAAB+LCAAAAAAABADtvQdgHEmWJSYvbcp7f0r1StfgdKEIgGATJNiQQBDswYjN5pLsHWlHIymrKoHKZVZlXWYWQMztnbz33nvvvffee++997o7nU4n99//P1xmZAFs9s5K2smeIYCqyB8/fnwfPyK+/Oxk68XJyXR3imf3znRvOt2aLqd79OE9+t+d6T59vpzu/z/qXGrGKQAAAA==
E434341851CB6D49098895531885FE3D	1	cxsmiles	JChemExcelLwAAAB+LCAAAAAAABADtvQdgHEmWJSYvbcp7f0r1StfgdKEIgGATJNiQQBDswYjN5pLsHWlHIymrKoHKZVZlXWYWQMztnbz33nvvvffee++997o7nU4n99//P1xmZAFs9s5K2smeIYCqyB8/fnwfPyJOvpzuTqdb0+l0d7lHvyyXe3em9+hP+uzenZP9z16cnLzYv3Nyn3+5//8AAqGoGS8AAAA=
019CF6DF68493F37F363DB99516879A2	1	cxsmiles	JChemExcelOQAAAB+LCAAAAAAABADtvQdgHEmWJSYvbcp7f0r1StfgdKEIgGATJNiQQBDswYjN5pLsHWlHIymrKoHKZVZlXWYWQMztnbz33nvvvffee++997o7nU4n99//P1xmZAFs9s5K2smeIYCqyB8/fnwfPyKenWw9u0P/m+5Op9Ot6XT3zoutk72TE/r3ZO/O9B5/urx3R5tRw336aDnd/38ArGe87jkAAAA=
B36C7D9BF8560B31EC6726C5769C7423	1	cxsmiles	JChemExcelLwAAAB+LCAAAAAAABADtvQdgHEmWJSYvbcp7f0r1StfgdKEIgGATJNiQQBDswYjN5pLsHWlHIymrKoHKZVZlXWYWQMztnbz33nvvvffee++997o7nU4n99//P1xmZAFs9s5K2smeIYCqyB8/fnwfPyJOvpzuTunZOjnZ+uzLOy/2TuiXk5O9O8t79Nmd5XQfXz67M53e278z3f1/AHznjFMvAAAA
235F5E3B82173E26105821445D89AAAE	1	cxsmiles	JChemExcelLAAAAB+LCAAAAAAABADtvQdgHEmWJSYvbcp7f0r1StfgdKEIgGATJNiQQBDswYjN5pLsHWlHIymrKoHKZVZlXWYWQMztnbz33nvvvffee++997o7nU4n99//P1xmZAFs9s5K2smeIYCqyB8/fnwfPyJOTrZebJ3cme4up9O96daLO0v5Z2+5e2d6bzrdOinv6L/3/h8q4kSiLAAAAA==
06DFCE685DD194FB1E6493C253E011B9	1	cxsmiles	JChemExcelKgAAAB+LCAAAAAAABADtvQdgHEmWJSYvbcp7f0r1StfgdKEIgGATJNiQQBDswYjN5pLsHWlHIymrKoHKZVZlXWYWQMztnbz33nvvvffee++997o7nU4n99//P1xmZAFs9s5K2smeIYCqyB8/fnwfPyJOprvT5XTr5OTFydZnX96Z7k2nW9Nm78703pR+OynvTKf37nxv+e3v7/4/i1swpSoAAAA=
33A06D675981EFB97646E2377A1B0B5D	1	cxsmiles	JChemExcelGQAAAB+LCAAAAAAABADtvQdgHEmWJSYvbcp7f0r1StfgdKEIgGATJNiQQBDswYjN5pLsHWlHIymrKoHKZVZlXWYWQMztnbz33nvvvffee++997o7nU4n99//P1xmZAFs9s5K2smeIYCqyB8/fnwfPyJOprvT6daXd5bTreXuneUe/Ty5M53unfw/hhYoMRkAAAA=
8DDEB050DEE822E592330E4A8C13CCE2	1	cxsmiles	JChemExcelLQAAAB+LCAAAAAAABADtvQdgHEmWJSYvbcp7f0r1StfgdKEIgGATJNiQQBDswYjN5pLsHWlHIymrKoHKZVZlXWYWQMztnbz33nvvvffee++997o7nU4n99//P1xmZAFs9s5K2smeIYCqyB8/fnwfPyJOprtTPLsnL/ZOTk62vryzdXKyd2d6jz7bOinvTLem9+6cbD27Q/979v8AEdSnFy0AAAA=
DA1390A9A976ACB4255A6B58C74FEE16	1	cxsmiles	JChemExcelLwAAAB+LCAAAAAAABADtvQdgHEmWJSYvbcp7f0r1StfgdKEIgGATJNiQQBDswYjN5pLsHWlHIymrKoHKZVZlXWYWQMztnbz33nvvvffee++997o7nU4n99//P1xmZAFs9s5K2smeIYCqyB8/fnwfPyJOTra+nO5O6dk6Ke9Md++cbH325Z0X/NFeNd1aTvfow238vZxOd/8fAhrYiC8AAAA=
F85DD4A39D17C5508BC0C5CA07739298	1	cxsmiles	JChemExcelLwAAAB+LCAAAAAAABADtvQdgHEmWJSYvbcp7f0r1StfgdKEIgGATJNiQQBDswYjN5pLsHWlHIymrKoHKZVZlXWYWQMztnbz33nvvvffee++997o7nU4n99//P1xmZAFs9s5K2smeIYCqyB8/fnwfPyJOXmyd3Dk5eXGy9dmXd17snpzgg5PdO9O95XQ5vTedbjXTvXt3pvtTPPv/Dwwd+80vAAAA
52AC4EE1EE9D213CA713C65AB89D5DB9	1	cxsmiles	JChemExcelJgAAAB+LCAAAAAAABADtvQdgHEmWJSYvbcp7f0r1StfgdKEIgGATJNiQQBDswYjN5pLsHWlHIymrKoHKZVZlXWYWQMztnbz33nvvvffee++997o7nU4n99//P1xmZAFs9s5K2smeIYCqyB8/fnwfPyJOyunudDrd+/Lk5MXW9B79utXcu3Oy9dmXd16c7J+c7N+Z7k13/x/5LGQ7JgAAAA==
44183BA645424B3C0A22BF19CC520E9D	1	cxsmiles	JChemExcelKgAAAB+LCAAAAAAABADtvQdgHEmWJSYvbcp7f0r1StfgdKEIgGATJNiQQBDswYjN5pLsHWlHIymrKoHKZVZlXWYWQMztnbz33nvvvffee++997o7nU4n99//P1xmZAFs9s5K2smeIYCqyB8/fnwfPyJOXuyenLzYOjnZvTPdm063lvS/vTvTe9Ppcjq9d2e6P6UPn92ZTvf/HyNBAoMqAAAA
FB96EFBE21EC53CEA38F523AA8FAA5BD	1	cxsmiles	JChemExcelLgAAAB+LCAAAAAAABADtvQdgHEmWJSYvbcp7f0r1StfgdKEIgGATJNiQQBDswYjN5pLsHWlHIymrKoHKZVZlXWYWQMztnbz33nvvvffee++997o7nU4n99//P1xmZAFs9s5K2smeIYCqyB8/fnwfPyK+/Oxk62T35OTF1snJ7p3p3nS6tZwu9+4s703puXfnxf7JyfQ+fp/eP9n/fwDG6+qHLgAAAA==
B4A1C69FEC1A290C320E24B5C1B2EC03	1	cxsmiles	JChemExcelLwAAAB+LCAAAAAAABADtvQdgHEmWJSYvbcp7f0r1StfgdKEIgGATJNiQQBDswYjN5pLsHWlHIymrKoHKZVZlXWYWQMztnbz33nvvvffee++997o7nU4n99//P1xmZAFs9s5K2smeIYCqyB8/fnwfPyJOvpzuTqdb0yn92Jsut5bLvTvTe/QnfXbvzsn+Zy9OTl7s3zm5z7/c/38AyM71RS8AAAA=
B3118C8A3F025AE5FE429BBFC287238C	1	cxsmiles	JChemExcelMwAAAB+LCAAAAAAABADtvQdgHEmWJSYvbcp7f0r1StfgdKEIgGATJNiQQBDswYjN5pLsHWlHIymrKoHKZVZlXWYWQMztnbz33nvvvffee++997o7nU4n99//P1xmZAFs9s5K2smeIYCqyB8/fnwfPyJOvnfye/6e3/7+1ovdE3rkj93p3nQ63fryZHpvil+e3ZneuzOd7t052frsyzsv/h/BYikZMwAAAA==
77783CF02A7D45D68F4964591D2EFDE4	1	cxsmiles	JChemExcelIgAAAB+LCAAAAAAABADtvQdgHEmWJSYvbcp7f0r1StfgdKEIgGATJNiQQBDswYjN5pLsHWlHIymrKoHKZVZlXWYWQMztnbz33nvvvffee++997o7nU4n99//P1xmZAFs9s5K2smeIYCqyB8/fnwfPyJOprvL5d5068s703sn9EzvLad7093p/nQ63Xp2Zzrd/38ArMNLFSIAAAA=
BE0F8FD13B9E4B2462BE4C853437E456	1	cxsmiles	JChemExcelNwAAAB+LCAAAAAAABADtvQdgHEmWJSYvbcp7f0r1StfgdKEIgGATJNiQQBDswYjN5pLsHWlHIymrKoHKZVZlXWYWQMztnbz33nvvvffee++997o7nU4n99//P1xmZAFs9s5K2smeIYCqyB8/fnwfPyJOXm999uUd/P/F7snJydbJyXJvOd06md6b0rOPf6b39u/Qn1sv7iyny+nevTsnJ7v/D98xUb43AAAA
16A7DDDFF20C68EC6DFB4AECBF950146	1	cxsmiles	JChemExcelKgAAAB+LCAAAAAAABADtvQdgHEmWJSYvbcp7f0r1StfgdKEIgGATJNiQQBDswYjN5pLsHWlHIymrKoHKZVZlXWYWQMztnbz33nvvvffee++997o7nU4n99//P1xmZAFs9s5K2smeIYCqyB8/fnwfPyJeTHeX0+V0b7l1cnLv5OQF/XtnOd3ant6jT/enePan9+5Md/f+Hwv5VzMqAAAA
4679706214D21B359183386472501436	1	cxsmiles	JChemExcelKwAAAB+LCAAAAAAABADtvQdgHEmWJSYvbcp7f0r1StfgdKEIgGATJNiQQBDswYjN5pLsHWlHIymrKoHKZVZlXWYWQMztnbz33nvvvffee++997o7nU4n99//P1xmZAFs9s5K2smeIYCqyB8/fnwfPyK+PNn67Ms7090pPXvVdGs53d27M72HP6f3XsiX+/zX/v8DeikCVSsAAAA=
21E91594C8605641C5AF6DA0F65EC04F	1	cxsmiles	JChemExcelLQAAAB+LCAAAAAAABADtvQdgHEmWJSYvbcp7f0r1StfgdKEIgGATJNiQQBDswYjN5pLsHWlHIymrKoHKZVZlXWYWQMztnbz33nvvvffee++997o7nU4n99//P1xmZAFs9s5K2smeIYCqyB8/fnwfPyJOTr6c7k6n073pdGu6pB+7d6b3lsut6dYL+uVk67Mv77y4c7J1cof+d/L/AM8UaxItAAAA
0E0EC85F448DF896BDDB125D57C28AE2	1	cxsmiles	JChemExcelKwAAAB+LCAAAAAAABADtvQdgHEmWJSYvbcp7f0r1StfgdKEIgGATJNiQQBDswYjN5pLsHWlHIymrKoHKZVZlXWYWQMztnbz33nvvvffee++997o7nU4n99//P1xmZAFs9s5K2smeIYCqyB8/fnwfPyJOTk62XpxsffblnenuFM+u/rVHv2+d3JlO9+7wB1+e/D/iRTH2KwAAAA==
A3C6BBCFD9BB8EAFED73843E1D85147B	1	cxsmiles	JChemExcelMAAAAB+LCAAAAAAABADtvQdgHEmWJSYvbcp7f0r1StfgdKEIgGATJNiQQBDswYjN5pLsHWlHIymrKoHKZVZlXWYWQMztnbz33nvvvffee++997o7nU4n99//P1xmZAFs9s5K2smeIYCqyB8/fnwfPyJOTrZO7pxsvTjZ+uzLOyfT3Sk9e/hnurt3hz98Mb2HP7em9+6c/PiL/weboS/pMAAAAA==
CE00C56508D95A456558255215D65670	1	cxsmiles	JChemExcelOAAAAB+LCAAAAAAABADtvQdgHEmWJSYvbcp7f0r1StfgdKEIgGATJNiQQBDswYjN5pLsHWlHIymrKoHKZVZlXWYWQMztnbz33nvvvffee++997o7nU4n99//P1xmZAFs9s5K2smeIYCqyB8/fnwfPyJOXm999uUd/H+6O6Vna7p7Z7o3XU7vfW/57e/j7318enJygjbUarp/Z3pvuvf/ABpa7OI4AAAA
9597A9BE8543DDA07131440B91AE0040	1	cxsmiles	JChemExcelMwAAAB+LCAAAAAAABADtvQdgHEmWJSYvbcp7f0r1StfgdKEIgGATJNiQQBDswYjN5pLsHWlHIymrKoHKZVZlXWYWQMztnbz33nvvvffee++997o7nU4n99//P1xmZAFs9s5K2smeIYCqyB8/fnwfPyJOtk52T05277zYO5nem+K59+XJ/tbJyYutk+n96feW3/7+9NPpkj6//+mdk5P9Oyd7/w9lJAKqMwAAAA==
613793C49DEAD319ECD2DA8E78EE5F5D	1	cxsmiles	JChemExcelLwAAAB+LCAAAAAAABADtvQdgHEmWJSYvbcp7f0r1StfgdKEIgGATJNiQQBDswYjN5pLsHWlHIymrKoHKZVZlXWYWQMztnbz33nvvvffee++997o7nU4n99//P1xmZAFs9s5K2smeIYCqyB8/fnwfPyJOvpzuTqfTrZPyznS6++Jk67Mv75y82Dq5w79N96bL5dZy78703hTPvf8HnkIQwC8AAAA=
D9352550AF61D702583DEEEF347D4BAD	1	cxsmiles	JChemExcelIwAAAB+LCAAAAAAABADtvQdgHEmWJSYvbcp7f0r1StfgdKEIgGATJNiQQBDswYjN5pLsHWlHIymrKoHKZVZlXWYWQMztnbz33nvvvffee++997o7nU4n99//P1xmZAFs9s5K2smeIYCqyB8/fnwfPyJOTl5snZzcOeHnxXR3Ot368uTOdLo33cKP5XR37/8Bgyqt4SMAAAA=
358EC771D522C549E30D0C9D2B067D0C	1	cxsmiles	JChemExcelIQAAAB+LCAAAAAAABADtvQdgHEmWJSYvbcp7f0r1StfgdKEIgGATJNiQQBDswYjN5pLsHWlHIymrKoHKZVZlXWYWQMztnbz33nvvvffee++997o7nU4n99//P1xmZAFs9s5K2smeIYCqyB8/fnwfPyJenGx99uLOdHc6nW5Np7t3pnv0S7XcuzO9N8Vz7/8Bay6A5yEAAAA=
D91EC53E4CC25E5CCEEDCCCB6B64B211	1	cxsmiles	JChemExcelHAAAAB+LCAAAAAAABADtvQdgHEmWJSYvbcp7f0r1StfgdKEIgGATJNiQQBDswYjN5pLsHWlHIymrKoHKZVZlXWYWQMztnbz33nvvvffee++997o7nU4n99//P1xmZAFs9s5K2smeIYCqyB8/fnwfPyJOXm999uUd/P/kZPezF9O9KZ69L+mPL/8f5euqeRwAAAA=
8040E16E39D981203B36A84E6283D2C0	1	cxsmiles	JChemExcelKQAAAB+LCAAAAAAABADtvQdgHEmWJSYvbcp7f0r1StfgdKEIgGATJNiQQBDswYjN5pLsHWlHIymrKoHKZVZlXWYWQMztnbz33nvvvffee++997o7nU4n99//P1xmZAFs9s5K2smeIYCqyB8/fnwfPyK+/Oxk68XJyXR3+r3lt78/3Zvi2d27c3Lvs5PpPv+1/yX98eX/AyxW/iUpAAAA
CE0A71183FB8F2D29DAD74A0D1FA1456	1	cxsmiles	JChemExcelLAAAAB+LCAAAAAAABADtvQdgHEmWJSYvbcp7f0r1StfgdKEIgGATJNiQQBDswYjN5pLsHWlHIymrKoHKZVZlXWYWQMztnbz33nvvvffee++997o7nU4n99//P1xmZAFs9s5K2smeIYCqyB8/fnwfPyJevN767Ms7+P90d0rP1nT3znSPfrm3pD+W03vTvTsv9k9Ovjw52f9/AOD6Z0UsAAAA
958F1AF98B83F351768C5C2CABA6EBFA	1	cxsmiles	JChemExcelMQAAAB+LCAAAAAAABADtvQdgHEmWJSYvbcp7f0r1StfgdKEIgGATJNiQQBDswYjN5pLsHWlHIymrKoHKZVZlXWYWQMztnbz33nvvvffee++997o7nU4n99//P1xmZAFs9s5K2smeIYCqyB8/fnwfPyJenGx99uLOi+nudDrdmm6dlHemu3emexX9Md27M72Hj7XNnen03kn5/wByX7fdMQAAAA==
35C473BE11C26D7761A37DC445BA4C4A	1	cxsmiles	JChemExcelKQAAAB+LCAAAAAAABADtvQdgHEmWJSYvbcp7f0r1StfgdKEIgGATJNiQQBDswYjN5pLsHWlHIymrKoHKZVZlXWYWQMztnbz33nvvvffee++997o7nU4n99//P1xmZAFs9s5K2smeIYCqyB8/fnwfPyJOvpzuTqfTrel0986LrZOT6d4Uf57cWe7dOdn67Ms7J/dO8Nz7fwDHXfePKQAAAA==
C5730D8212142411B6D35D6E6F09EAA1	1	cxsmiles	JChemExcelKwAAAB+LCAAAAAAABADtvQdgHEmWJSYvbcp7f0r1StfgdKEIgGATJNiQQBDswYjN5pLsHWlHIymrKoHKZVZlXWYWQMztnbz33nvvvffee++997o7nU4n99//P1xmZAFs9s5K2smeIYCqyB8/fnwfPyJOTnY/e/Fi62Trsy/vnOyeTPem9NzDP9O9e3em+8vpff7jfrP//wD75b/tKwAAAA==
0E2CB184CD468034C9C10FF96FAA1C8B	1	cxsmiles	JChemExcelJQAAAB+LCAAAAAAABADtvQdgHEmWJSYvbcp7f0r1StfgdKEIgGATJNiQQBDswYjN5pLsHWlHIymrKoHKZVZlXWYWQMztnbz33nvvvffee++997o7nU4n99//P1xmZAFs9s5K2smeIYCqyB8/fnwfPyJOprtTPLsnW599eefF3ovPTrZeTO/xZ/fuvD7Z2zq5c/L/AHCXkX4lAAAA
163EBDECF47EA4A07EAC8E62B7BDF793	1	cxsmiles	JChemExcelRQAAAB+LCAAAAAAABADtvQdgHEmWJSYvbcp7f0r1StfgdKEIgGATJNiQQBDswYjN5pLsHWlHIymrKoHKZVZlXWYWQMztnbz33nvvvffee++997o7nU4n99//P1xmZAFs9s5K2smeIYCqyB8/fnwfPyK+/Oxk68XuycmLrZOTvc9OTvDn663PvryzdXJP/jy5Q//eu0Mf0c+9Oycnu3dO9umrrZMff3GHm+z/P40poU1FAAAA
298D2AF858C604334882AE4335C5850C	1	cxsmiles	JChemExcelRgAAAB+LCAAAAAAABADtvQdgHEmWJSYvbcp7f0r1StfgdKEIgGATJNiQQBDswYjN5pLsHWlHIymrKoHKZVZlXWYWQMztnbz33nvvvffee++997o7nU4n99//P1xmZAFs9s5K2smeIYCqyB8/fnwfPyK+/Oxk68XuycmLrZOTvc9OTvDn663PvryzdXJP/vzy5A79uHeHPqOfe3dOTnbvnOzTd1snP/7iDrfZ/38ANGt8REYAAAA=
847814DA735FEBF7CD9FC098068CAEC3	1	cxsmiles	JChemExcelLAAAAB+LCAAAAAAABADtvQdgHEmWJSYvbcp7f0r1StfgdKEIgGATJNiQQBDswYjN5pLsHWlHIymrKoHKZVZlXWYWQMztnbz33nvvvffee++997o7nU4n99//P1xmZAFs9s5K2smeIYCqyB8/fnwfPyJOvpzuTqfTrZMXeyf0+z38Pp3eO9m7c7J1cmfryzsnL+jnyZ3pdPfk/wFc89uiLAAAAA==
DB4F4169C646E038B481D97AFD4D91A6	1	cxsmiles	JChemExcelLAAAAB+LCAAAAAAABADtvQdgHEmWJSYvbcp7f0r1StfgdKEIgGATJNiQQBDswYjN5pLsHWlHIymrKoHKZVZlXWYWQMztnbz33nvvvffee++997o7nU4n99//P1xmZAFs9s5K2smeIYCqyB8/fnwfPyJOvpzuTqdb0+l098s70z38upzuvbgzvTflj+/deb312Zd38P+T/wevNOuCLAAAAA==
287D8A90096D857351BA967C3748F32C	1	cxsmiles	JChemExcelJwAAAB+LCAAAAAAABADtvQdgHEmWJSYvbcp7f0r1StfgdKEIgGATJNiQQBDswYjN5pLsHWlHIymrKoHKZVZlXWYWQMztnbz33nvvvffee++997o7nU4n99//P1xmZAFs9s5K2smeIYCqyB8/fnwfPyJOprvT6XRvOt06uffiZOuzL+9M96d49l/cu0MflneW9O3u/wOh1aiRJwAAAA==
0A0BFAB758D541273C65E98BEF5BA689	1	cxsmiles	JChemExcelNAAAAB+LCAAAAAAABADtvQdgHEmWJSYvbcp7f0r1StfgdKEIgGATJNiQQBDswYjN5pLsHWlHIymrKoHKZVZlXWYWQMztnbz33nvvvffee++997o7nU4n99//P1xmZAFs9s5K2smeIYCqyB8/fnwfPyJOTl5snZzcOaGfu/L77p2Trc++vDPdm9KzNd27M723rKZby3v0+bM79L9n/w9/mSuyNAAAAA==
4B37F97C05238BF971E8C824C9749DB4	1	cxsmiles	JChemExcelNgAAAB+LCAAAAAAABADtvQdgHEmWJSYvbcp7f0r1StfgdKEIgGATJNiQQBDswYjN5pLsHWlHIymrKoHKZVZlXWYWQMztnbz33nvvvffee++997o7nU4n99//P1xmZAFs9s5K2smeIYCqyB8/fnwfPyJOTrZO7tD/prvT6dbJ1mdf3nmxd3LyYuvkZO/O9N5yOl1O7538+Is7y62T6f4Uz/6d5e7/A3drSCg2AAAA
E42A947A1E14F5FFBE31EC064FEA5ECF	1	cxsmiles	JChemExcelKgAAAB+LCAAAAAAABADtvQdgHEmWJSYvbcp7f0r1StfgdKEIgGATJNiQQBDswYjN5pLsHWlHIymrKoHKZVZlXWYWQMztnbz33nvvvffee++997o7nU4n99//P1xmZAFs9s5K2smeIYCqyB8/fnwfPyKenWw9u0P/m+5Op9Otkxd7J1uffXnn5MuT6T188KS+M53u3aN/dv8f/NqezSoAAAA=
09F1665D2BC5546A9C1241F7BABB5083	1	cxsmiles	JChemExcelLgAAAB+LCAAAAAAABADtvQdgHEmWJSYvbcp7f0r1StfgdKEIgGATJNiQQBDswYjN5pLsHWlHIymrKoHKZVZlXWYWQMztnbz33nvvvffee++997o7nU4n99//P1xmZAFs9s5K2smeIYCqyB8/fnwfPyJOyunudDrdW063pvS/venunZOtz7688+Lk5MXuCT275tcvT052/x9xAjd3LgAAAA==
98494A2F0F6B3A17789DA8B1C42DC61E	1	cxsmiles	JChemExcelKwAAAB+LCAAAAAAABADtvQdgHEmWJSYvbcp7f0r1StfgdKEIgGATJNiQQBDswYjN5pLsHWlHIymrKoHKZVZlXWYWQMztnbz33nvvvffee++997o7nU4n99//P1xmZAFs9s5K2smeIYCqyB8/fnwfPyJOTk52Pzs52frsyzsvtk7u0C8vdu+8PpFf6bPp3nQ63Xp2Zzrd+38AWbKmpisAAAA=
2EA3E01343BB3073459E08A7197AE7E4	1	cxsmiles	JChemExcelJgAAAB+LCAAAAAAABADtvQdgHEmWJSYvbcp7f0r1StfgdKEIgGATJNiQQBDswYjN5pLsHWlHIymrKoHKZVZlXWYWQMztnbz33nvvvffee++997o7nU4n99//P1xmZAFs9s5K2smeIYCqyB8/fnwfPyKeTXen0+nWdLp752Trsy/vvNg6OXkx3Zvi2bszvce/3Pt/ABdcQTImAAAA
EFC55E7A288E39239FACC654F6EBFDE1	1	cxsmiles	JChemExcelIgAAAB+LCAAAAAAABADtvQdgHEmWJSYvbcp7f0r1StfgdKEIgGATJNiQQBDswYjN5pLsHWlHIymrKoHKZVZlXWYWQMztnbz33nvvvffee++997o7nU4n99//P1xmZAFs9s5K2smeIYCqyB8/fnwfPyJeTHeX060Xd6Z703snJy+2Tqb7Uzz7d06m95rp3nL3/wEFBZZ8IgAAAA==
49F60246DC277A01925FE78C0BFE8106	1	cxsmiles	JChemExcelLAAAAB+LCAAAAAAABADtvQdgHEmWJSYvbcp7f0r1StfgdKEIgGATJNiQQBDswYjN5pLsHWlHIymrKoHKZVZlXWYWQMztnbz33nvvvffee++997o7nU4n99//P1xmZAFs9s5K2smeIYCqyB8/fnwfPyJOvpzuTunZenGy9dmXd6Z703snJyfTe810Tz/Zp2+X0/07093/B6RoaKgsAAAA
85B884AE5793AC8D1E9AA9C68285CAEF	1	cxsmiles	JChemExcelMwAAAB+LCAAAAAAABADtvQdgHEmWJSYvbcp7f0r1StfgdKEIgGATJNiQQBDswYjN5pLsHWlHIymrKoHKZVZlXWYWQMztnbz33nvvvffee++997o7nU4n99//P1xmZAFs9s5K2smeIYCqyB8/fnwfPyJOvpzuTqfTrel098uTO9O9ajndWu7dmd6b4tMXJ1uffXnnZLqPP57dmU7370zv/T9+WOBsMwAAAA==
FB46A91FE6533452AE6AA8F54EF4A101	1	cxsmiles	JChemExcelJgAAAB+LCAAAAAAABADtvQdgHEmWJSYvbcp7f0r1StfgdKEIgGATJNiQQBDswYjN5pLsHWlHIymrKoHKZVZlXWYWQMztnbz33nvvvffee++997o7nU4n99//P1xmZAFs9s5K2smeIYCqyB8/fnwfPyJOprvT6dbJneke/fje8tvfp19275xsffblnRcn907kuff/ABruZtQmAAAA
5E546CA8506AF5DE06483F06DF02FEE8	1	cxsmiles	JChemExcelIgAAAB+LCAAAAAAABADtvQdgHEmWJSYvbcp7f0r1StfgdKEIgGATJNiQQBDswYjN5pLsHWlHIymrKoHKZVZlXWYWQMztnbz33nvvvffee++997o7nU4n99//P1xmZAFs9s5K2smeIYCqyB8/fnwfPyJO6JnuTqfTreV0987J1mdf3nkx3VvSB/emePbu/T+ZokpMIgAAAA==
070D8C9B17026970A44414526F347761	1	cxsmiles	JChemExcelMQAAAB+LCAAAAAAABADtvQdgHEmWJSYvbcp7f0r1StfgdKEIgGATJNiQQBDswYjN5pLsHWlHIymrKoHKZVZlXWYWQMztnbz33nvvvffee++997o7nU4n99//P1xmZAFs9s5K2smeIYCqyB8/fnwfPyJOvjzZ+uzLOye7n51sndx5QX/Qz93p3pSee8tqOd27d4dbfInvT+6c/D8XG4FdMQAAAA==
045573CB5031C000D94BDC50C340720D	1	cxsmiles	JChemExcelKgAAAB+LCAAAAAAABADtvQdgHEmWJSYvbcp7f0r1StfgdKEIgGATJNiQQBDswYjN5pLsHWlHIymrKoHKZVZlXWYWQMztnbz33nvvvffee++997o7nU4n99//P1xmZAFs9s5K2smeIYCqyB8/fnwfPyJOvpzuTvHsnmyd3HlxcrL12Zd3Xkz3ptMt+nDvpLxzsvXsDv3v2f8DEsosTyoAAAA=
84C0CF0BD80B16A0D28129791A3A67AB	1	cxsmiles	JChemExcelJwAAAB+LCAAAAAAABADtvQdgHEmWJSYvbcp7f0r1StfgdKEIgGATJNiQQBDswYjN5pLsHWlHIymrKoHKZVZlXWYWQMztnbz33nvvvffee++997o7nU4n99//P1xmZAFs9s5K2smeIYCqyB8/fnwfPyJeTHeX0+V0j3/snXzv5Pf8Pb/9/a0v79hfTrY++/LOl/8Po1CGNicAAAA=
51BEA1AA567864D1052E9C448861BEF2	1	cxsmiles	JChemExcelPwAAAB+LCAAAAAAABADtvQdgHEmWJSYvbcp7f0r1StfgdKEIgGATJNiQQBDswYjN5pLsHWlHIymrKoHKZVZlXWYWQMztnbz33nvvvffee++997o7nU4n99//P1xmZAFs9s5K2smeIYCqyB8/fnwfPyJOvnfye/6e39/d+vIO//bt72+d7N6Z7i2nW9N70+l0n/6/taQf9+5M70/x3L8z/XS69eLOcjpd7n36/wBsZgjFPwAAAA==
497B2DBFE41A7DB2EEFD1510503BB9B8	1	cxsmiles	JChemExcelKAAAAB+LCAAAAAAABADtvQdgHEmWJSYvbcp7f0r1StfgdKEIgGATJNiQQBDswYjN5pLsHWlHIymrKoHKZVZlXWYWQMztnbz33nvvvffee++997o7nU4n99//P1xmZAFs9s5K2smeIYCqyB8/fnwfPyJeTHen0+nWdLp752Trsy/vvJjuyd97d6b3qun+FM/+8t7/A0//G/AoAAAA
2E77CE176D6D2F7F373D1D5E2E6D712C	1	cxsmiles	JChemExcelJQAAAB+LCAAAAAAABADtvQdgHEmWJSYvbcp7f0r1StfgdKEIgGATJNiQQBDswYjN5pLsHWlHIymrKoHKZVZlXWYWQMztnbz33nvvvffee++997o7nU4n99//P1xmZAFs9s5K2smeIYCqyB8/fnwfPyJOTrZO7rzYOpnuTulZ7t45me5Nm+nWcu/O9F41pS+n03v/D7qfdMUlAAAA
CB48075C8AF291B54ECD0B3BFBF423AA	1	cxsmiles	JChemExcelKAAAAB+LCAAAAAAABADtvQdgHEmWJSYvbcp7f0r1StfgdKEIgGATJNiQQBDswYjN5pLsHWlHIymrKoHKZVZlXWYWQMztnbz33nvvvffee++997o7nU4n99//P1xmZAFs9s5K2smeIYCqyB8/fnwfPyJOprvT6daL6d50upxO9+4s7y2nWyd3plvT/Sme/ZPyzvTecvf/AXuUNyYoAAAA
29E9775473F17C5062AE8B9EC9B132E8	1	cxsmiles	JChemExcelGwAAAB+LCAAAAAAABADtvQdgHEmWJSYvbcp7f0r1StfgdKEIgGATJNiQQBDswYjN5pLsHWlHIymrKoHKZVZlXWYWQMztnbz33nvvvffee++997o7nU4n99//P1xmZAFs9s5K2smeIYCqyB8/fnwfPyJOvpzuTqdbL062Tu6cnJy8uDPdW07p2Zvu/j+v27FOGwAAAA==
94C79C1792D01B005BB79C147E5BA177	1	cxsmiles	JChemExcelKwAAAB+LCAAAAAAABADtvQdgHEmWJSYvbcp7f0r1StfgdKEIgGATJNiQQBDswYjN5pLsHWlHIymrKoHKZVZlXWYWQMztnbz33nvvvffee++997o7nU4n99//P1xmZAFs9s5K2smeIYCqyB8/fnwfPyJOvpzuTqfTrel098uTOyd7Jydbn714sUf/fnlneq+ir+7dme7Tj2b//wFQaTxiKwAAAA==
A6112BEECE08A7F937A44B4463EF864F	1	cxsmiles	JChemExcelIwAAAB+LCAAAAAAABADtvQdgHEmWJSYvbcp7f0r1StfgdKEIgGATJNiQQBDswYjN5pLsHWlHIymrKoHKZVZlXWYWQMztnbz33nvvvffee++997o7nU4n99//P1xmZAFs9s5K2smeIYCqyB8/fnwfPyJOXuyenJy82Do52b1zsjXdm+LZuzO9Rz+2Tso70+m9/wfm/rMIIwAAAA==
F4F5765485167A2E62A4A081C2F2ABD5	1	cxsmiles	JChemExcelNwAAAB+LCAAAAAAABADtvQdgHEmWJSYvbcp7f0r1StfgdKEIgGATJNiQQBDswYjN5pLsHWlHIymrKoHKZVZlXWYWQMztnbz33nvvvffee++997o7nU4n99//P1xmZAFs9s5K2smeIYCqyB8/fnwfPyJOTrZO7tD/vjzZ+uzLOy92T05ebJ2c7N6Z7k2nW8vvLb/9/b0703tT+uPL6f4Uz/6d6fTe/wNT01SnNwAAAA==
C9A36A2643B75885E6047B118F417E0B	1	cxsmiles	JChemExcelQQAAAB+LCAAAAAAABADtvQdgHEmWJSYvbcp7f0r1StfgdKEIgGATJNiQQBDswYjN5pLsHWlHIymrKoHKZVZlXWYWQMztnbz33nvvvffee++997o7nU4n99//P1xmZAFs9s5K2smeIYCqyB8/fnwfPyJOTqa7y+nedDrdOinvTJd7092Trc++vPPiZHoPH06n9+682D85Odk6Odm/M72Pz7482Xp2h/737M50ev//ATUrQkNBAAAA
9A8FB9233F59316C917160090A3C4A81	1	cxsmiles	JChemExcelLgAAAB+LCAAAAAAABADtvQdgHEmWJSYvbcp7f0r1StfgdKEIgGATJNiQQBDswYjN5pLsHWlHIymrKoHKZVZlXWYWQMztnbz33nvvvffee++997o7nU4n99//P1xmZAFs9s5K2smeIYCqyB8/fnwfPyJOTrZO7ix3p/h3Ot2d7k2ny+nWi+m96XS6NZ3eu/N667Mv7+D/1GDv/wHwgU0VLgAAAA==
5D3BD6BCA684CDFCFF2BA8CB4B0A30AE	1	cxsmiles	JChemExcelIwAAAB+LCAAAAAAABADtvQdgHEmWJSYvbcp7f0r1StfgdKEIgGATJNiQQBDswYjN5pLsHWlHIymrKoHKZVZlXWYWQMztnbz33nvvvffee++997o7nU4n99//P1xmZAFs9s5K2smeIYCqyB8/fnwfPyJOTr6c7k6n060vT062PvvyzovpHv1xckf+2aOfu/8PVi8ohyMAAAA=
8285BAB14FD13325EF5DB3874A8F31A1	1	cxsmiles	JChemExcelJwAAAB+LCAAAAAAABADtvQdgHEmWJSYvbcp7f0r1StfgdKEIgGATJNiQQBDswYjN5pLsHWlHIymrKoHKZVZlXWYWQMztnbz33nvvvffee++997o7nU4n99//P1xmZAFs9s5K2smeIYCqyB8/fnwfPyJOvjzZ+uzLOy+mu8vp3nS6NZ1O9763/Pb3d+/w59N7Uzz3/h/304/YJwAAAA==
5FC6AAB576DEF7E7D158A664A9DBB9FF	1	cxsmiles	JChemExcelNQAAAB+LCAAAAAAABADtvQdgHEmWJSYvbcp7f0r1StfgdKEIgGATJNiQQBDswYjN5pLsHWlHIymrKoHKZVZlXWYWQMztnbz33nvvvffee++997o7nU4n99//P1xmZAFs9s5K2smeIYCqyB8/fnwfPyJOvnfye377+7snX073plsv7p2cvNg6uXNycu/OdOvZnel0/2Trsy/v0D8nL3ane/t3+M8v/x8gOdbeNQAAAA==
ADD6FE7DC2589E298BA747A0847D1C73	1	cxsmiles	JChemExcelJAAAAB+LCAAAAAAABADtvQdgHEmWJSYvbcp7f0r1StfgdKEIgGATJNiQQBDswYjN5pLsHWlHIymrKoHKZVZlXWYWQMztnbz33nvvvffee++997o7nU4n99//P1xmZAFs9s5K2smeIYCqyB8/fnwfPyKeTXen9Gx9eXKy9dmXd15M95bTrWmzd2d6D58v792Z7v4/ZtavcyQAAAA=
1991619BA691DBD8D44947D22213A7F7	1	cxsmiles	JChemExcelMQAAAB+LCAAAAAAABADtvQdgHEmWJSYvbcp7f0r1StfgdKEIgGATJNiQQBDswYjN5pLsHWlHIymrKoHKZVZlXWYWQMztnbz33nvvvffee++997o7nU4n99//P1xmZAFs9s5K2smeIYCqyB8/fnwfPyJOvpzuTqfTrel098uT6R79Ol3u3Tm599mLF1sn+yf87N852frsS/pw6+TOyf8D1gN3HjEAAAA=
3D6785E919FB443EFC1A31FD8AFC0A90	1	cxsmiles	JChemExcelKwAAAB+LCAAAAAAABADtvQdgHEmWJSYvbcp7f0r1StfgdKEIgGATJNiQQBDswYjN5pLsHWlHIymrKoHKZVZlXWYWQMztnbz33nvvvffee++997o7nU4n99//P1xmZAFs9s5K2smeIYCqyB8/fnwfPyJOXm999uUd/H+6O8Wze4I/XmydTPf4770703v8y73/B0QWlEMrAAAA
181C492415FD805F8017D8CB6FFA9587	1	cxsmiles	JChemExcelIgAAAB+LCAAAAAAABADtvQdgHEmWJSYvbcp7f0r1StfgdKEIgGATJNiQQBDswYjN5pLsHWlHIymrKoHKZVZlXWYWQMztnbz33nvvvffee++997o7nU4n99//P1xmZAFs9s5K2smeIYCqyB8/fnwfPyJOprvT6XTrxcnWZ1/eOTnZO/lyem+K596Xe3em092T8v8BRsBZhiIAAAA=
7E77EFD7256AF1233B92C0553A9BBA85	1	cxsmiles	JChemExcelJgAAAB+LCAAAAAAABADtvQdgHEmWJSYvbcp7f0r1StfgdKEIgGATJNiQQBDswYjN5pLsHWlHIymrKoHKZVZlXWYWQMztnbz33nvvvffee++997o7nU4n99//P1xmZAFs9s5K2smeIYCqyB8/fnwfPyJOvpzuTqfTrRfTvSmevRcnW599eWd6Dx9+eWc5vXdnOt39fwCg+xEUJgAAAA==
3285D16C3B40C510B7876681D5CC47E9	1	cxsmiles	JChemExcelJgAAAB+LCAAAAAAABADtvQdgHEmWJSYvbcp7f0r1StfgdKEIgGATJNiQQBDswYjN5pLsHWlHIymrKoHKZVZlXWYWQMztnbz33nvvvffee++997o7nU4n99//P1xmZAFs9s5K2smeIYCqyB8/fnwfPyK+/Oxk68V0dzndmja7d6Z7U3qWe3em96bL6fLedB9/T/f/H/mLb3omAAAA
909C35677C52D9651BEE7996B640A32A	1	cxsmiles	JChemExcelLwAAAB+LCAAAAAAABADtvQdgHEmWJSYvbcp7f0r1StfgdKEIgGATJNiQQBDswYjN5pLsHWlHIymrKoHKZVZlXWYWQMztnbz33nvvvffee++997o7nU4n99//P1xmZAFs9s5K2smeIYCqyB8/fnwfPyJOTrZO7rygfz/78s6L6e6Unq3p7h39e0/+3qO/n92h/z37fwBUGepALwAAAA==
B12D2FB520F8B8627ADF5832987D581A	1	cxsmiles	JChemExcelIQAAAB+LCAAAAAAABADtvQdgHEmWJSYvbcp7f0r1StfgdKEIgGATJNiQQBDswYjN5pLsHWlHIymrKoHKZVZlXWYWQMztnbz33nvvvffee++997o7nU4n99//P1xmZAFs9s5K2smeIYCqyB8/fnwfPyJOprvL6d6UnuXedPdk67Mv77w4md6jv7dOyjvT6b3/B8ZCX8EhAAAA
AC0C3A8280A97BA31DAF8149246CE74B	1	cxsmiles	JChemExcelIwAAAB+LCAAAAAAABADtvQdgHEmWJSYvbcp7f0r1StfgdKEIgGATJNiQQBDswYjN5pLsHWlHIymrKoHKZVZlXWYWQMztnbz33nvvvffee++997o7nU4n99//P1xmZAFs9s5K2smeIYCqyB8/fnwfPyJenGydnGx99uWd6e50Ot06Ke9Mp7v07wl+xf9Pyv8HDrNyxiMAAAA=
119A472CCBAED790E4291ED7C16E6FCC	1	cxsmiles	JChemExcelKwAAAB+LCAAAAAAABADtvQdgHEmWJSYvbcp7f0r1StfgdKEIgGATJNiQQBDswYjN5pLsHWlHIymrKoHKZVZlXWYWQMztnbz33nvvvffee++997o7nU4n99//P1xmZAFs9s5K2smeIYCqyB8/fnwfPyJOvpzuTqfTrSn92Jsut5bLvTvTe/LJvTsnW5+9uPNCf/w/3oYzUisAAAA=
76B00AB4F575B24BB0568165EB8DE0FA	1	cxsmiles	JChemExcelrQAAAB+LCAAAAAAABADtvQdgHEmWJSYvbcp7f0r1StfgdKEIgGATJNiQQBDswYjN5pLsHWlHIymrKoHKZVZlXWYWQMztnbz33nvvvffee++997o7nU4n99//P1xmZAFs9s5K2smeIYCqyB8/fnwfPyJOprvT6XRrOt19cbL12Zd3pntT/C1/vJje47+m9+7o3/vcdrp/Yj64z99/yh9vTe9/euc1Psf/vxz4dbpn3n3A7x7ouw8Obnz3/wHh5ir+rQAAAA==
A015C5BA7A842E3448F8CB152E73CC50	1	cxsmiles	JChemExcelKQAAAB+LCAAAAAAABADtvQdgHEmWJSYvbcp7f0r1StfgdKEIgGATJNiQQBDswYjN5pLsHWlHIymrKoHKZVZlXWYWQMztnbz33nvvvffee++997o7nU4n99//P1xmZAFs9s5K2smeIYCqyB8/fnwfPyJOvpzuTqdbJy/2Tk5O7m2dnOzdOfnsZLo/xXNv/850ev9LtLn//wAIU0ZUKQAAAA==
E4958F3A377BC21F317A1F47624F1B01	1	cxsmiles	JChemExcelJgAAAB+LCAAAAAAABADtvQdgHEmWJSYvbcp7f0r1StfgdKEIgGATJNiQQBDswYjN5pLsHWlHIymrKoHKZVZlXWYWQMztnbz33nvvvffee++997o7nU4n99//P1xmZAFs9s5K2smeIYCqyB8/fnwfPyK+fLL75cl0bzqdbr042frsyzvTe1M89062nt2h/z27M53u7v0/UGv5FiYAAAA=
8423516B45CFCAE74D8C59FE5DB89FE5	1	cxsmiles	JChemExcelMQAAAB+LCAAAAAAABADtvQdgHEmWJSYvbcp7f0r1StfgdKEIgGATJNiQQBDswYjN5pLsHWlHIymrKoHKZVZlXWYWQMztnbz33nvvvffee++997o7nU4n99//P1xmZAFs9s5K2smeIYCqyB8/fnwfPyJOprvT6d4Uz95y9+Rk67Mv77y4Rz+/nO7zp/f278iH90/w3P9/ADl+58AxAAAA
D1578063EF058175931008DA2A4DBF2A	1	cxsmiles	JChemExcelJwAAAB+LCAAAAAAABADtvQdgHEmWJSYvbcp7f0r1StfgdKEIgGATJNiQQBDswYjN5pLsHWlHIymrKoHKZVZlXWYWQMztnbz33nvvvffee++997o7nU4n99//P1xmZAFs9s5K2smeIYCqyB8/fnwfPyJOTna3Tu6cTPemWydf7t6Zbi2n95rldOtJfWe6d+/Oi/2Tky9PTvb/H2MBbYUnAAAA
BCEE80DE13205F0A1B9BFC2256D9D3FA	1	cxsmiles	JChemExcelJQAAAB+LCAAAAAAABADtvQdgHEmWJSYvbcp7f0r1StfgdKEIgGATJNiQQBDswYjN5pLsHWlHIymrKoHKZVZlXWYWQMztnbz33nvvvffee++997o7nU4n99//P1xmZAFs9s5K2smeIYCqyB8/fnwfPyKeTXeneHZP9k7of1uffXnnxfTecro1be7dme7jq+X+/wN23zJ3JQAAAA==
918610E10149EFA06DC24938085D7EC7	1	cxsmiles	JChemExcelKgAAAB+LCAAAAAAABADtvQdgHEmWJSYvbcp7f0r1StfgdKEIgGATJNiQQBDswYjN5pLsHWlHIymrKoHKZVZlXWYWQMztnbz33nvvvffee++997o7nU4n99//P1xmZAFs9s5K2smeIYCqyB8/fnwfPyJOTnY/e3GyR///7OTF3snWi5N7n53Q71snW8/u0P+e3aE/7t357GT3/wHbHbfUKgAAAA==
EC86555269C592543698565FB0C0939A	1	cxsmiles	JChemExcelLAAAAB+LCAAAAAAABADtvQdgHEmWJSYvbcp7f0r1StfgdKEIgGATJNiQQBDswYjN5pLsHWlHIymrKoHKZVZlXWYWQMztnbz33nvvvffee++997o7nU4n99//P1xmZAFs9s5K2smeIYCqyB8/fnwfPyJOXmyd3Dk52frsyzsvTk5e7J5sTfemePbuTO9Np1sn5R36496Lz052T/4fLVyh6CwAAAA=
687A011887DB25FB4FDDF26C885F9C5D	1	cxsmiles	JChemExcelLgAAAB+LCAAAAAAABADtvQdgHEmWJSYvbcp7f0r1StfgdKEIgGATJNiQQBDswYjN5pLsHWlHIymrKoHKZVZlXWYWQMztnbz33nvvvffee++997o7nU4n99//P1xmZAFs9s5K2smeIYCqyB8/fnwfPyJOprvT6XTrxcnWZ1/eme7Rr/Tn3smd1/gb/6dvTu7Q/07uLKe7/w/50x22LgAAAA==
CF1D05DC8FD5E08930C60DD9786FEB47	1	cxsmiles	JChemExcelKQAAAB+LCAAAAAAABADtvQdgHEmWJSYvbcp7f0r1StfgdKEIgGATJNiQQBDswYjN5pLsHWlHIymrKoHKZVZlXWYWQMztnbz33nvvvffee++997o7nU4n99//P1xmZAFs9s5K2smeIYCqyB8/fnwfPyJOTrZeTHen062T8s50Ot19sXdy8uXJyd6dk63Pvrzz4t4JPVsnd07u/T+SOGVTKQAAAA==
575D8753B890635DB2812E86FE5FD5BD	1	cxsmiles	JChemExcelKwAAAB+LCAAAAAAABADtvQdgHEmWJSYvbcp7f0r1StfgdKEIgGATJNiQQBDswYjN5pLsHWlHIymrKoHKZVZlXWYWQMztnbz33nvvvffee++997o7nU4n99//P1xmZAFs9s5K2smeIYCqyB8/fnwfPyJOXmydbH325Z3p7nS6N92a0rP3veW3v797Z3pvuqT/7t2Z7uPT6f7/A7opFiUrAAAA
8272A6AC8540C4DE716523DE23CF1AAB	1	cxsmiles	JChemExcelGgAAAB+LCAAAAAAABADtvQdgHEmWJSYvbcp7f0r1StfgdKEIgGATJNiQQBDswYjN5pLsHWlHIymrKoHKZVZlXWYWQMztnbz33nvvvffee++997o7nU4n99//P1xmZAFs9s5K2smeIYCqyB8/fnwfPyJeTHeX0+l0j/6/9eX03nRKf927M53u7v0/c+40ahoAAAA=
0EEE215415B35E90C2F31C68D8053C12	1	cxsmiles	JChemExcelFwAAAB+LCAAAAAAABADtvQdgHEmWJSYvbcp7f0r1StfgdKEIgGATJNiQQBDswYjN5pLsHWlHIymrKoHKZVZlXWYWQMztnbz33nvvvffee++997o7nU4n99//P1xmZAFs9s5K2smeIYCqyB8/fnwfPyJOTl5snZzcOdn67Ms7L3b5rzsnJ7v/D49YtWYXAAAA
49C9CBE183937AB817C58F089C4292F1	1	cxsmiles	JChemExcelLwAAAB+LCAAAAAAABADtvQdgHEmWJSYvbcp7f0r1StfgdKEIgGATJNiQQBDswYjN5pLsHWlHIymrKoHKZVZlXWYWQMztnbz33nvvvffee++997o7nU4n99//P1xmZAFs9s5K2smeIYCqyB8/fnwfPyJOTrZO7py8eL312Zd38P/p7nQ63Tqhj+mPF9M9/qu8M53undA/u/8PL0H/gC8AAAA=
EAE51D4850F42F365B5192C2D0ED2229	1	cxsmiles	JChemExcelFgAAAB+LCAAAAAAABADtvQdgHEmWJSYvbcp7f0r1StfgdKEIgGATJNiQQBDswYjN5pLsHWlHIymrKoHKZVZlXWYWQMztnbz33nvvvffee++997o7nU4n99//P1xmZAFs9s5K2smeIYCqyB8/fnwfPyJeTHen0+lyuvtiuke/bJ2Ud6bTvf8HdC0F5hYAAAA=
9723508BE3EA309E79F98B6F5625881D	1	cxsmiles	JChemExcelMgAAAB+LCAAAAAAABADtvQdgHEmWJSYvbcp7f0r1StfgdKEIgGATJNiQQBDswYjN5pLsHWlHIymrKoHKZVZlXWYWQMztnbz33nvvvffee++997o7nU4n99//P1xmZAFs9s5K2smeIYCqyB8/fnwfPyJOTk6mu9PpdGs63b3zeuuzL+/g/y+me/js5MW9k5MXWycn+/S/Oycn9+5Mp3v/D/uVuuUyAAAA
98F39F982AA461426BDE7620236B298D	1	cxsmiles	JChemExcelGQAAAB+LCAAAAAAABADtvQdgHEmWJSYvbcp7f0r1StfgdKEIgGATJNiQQBDswYjN5pLsHWlHIymrKoHKZVZlXWYWQMztnbz33nvvvffee++997o7nU4n99//P1xmZAFs9s5K2smeIYCqyB8/fnwfPyKenWw9u0P/m+4ul9O96XS6dVLeWS539/4fR+XEExkAAAA=
8FAF8505E5087DAA3184C1C45B414A62	1	cxsmiles	JChemExcelOgAAAB+LCAAAAAAABADtvQdgHEmWJSYvbcp7f0r1StfgdKEIgGATJNiQQBDswYjN5pLsHWlHIymrKoHKZVZlXWYWQMztnbz33nvvvffee++997o7nU4n99//P1xmZAFs9s5K2smeIYCqyB8/fnwfPyKeTXen0y3637M7092Tvc9OTl5snUzvTfHcu3Nysnfnxf7J905+z29/f+vky+n96bRa3r/z5cn+Z1/+P9z2ifM6AAAA
97B388A69ACC70CDC215F1A533A21D09	1	cxsmiles	JChemExcelMwAAAB+LCAAAAAAABADtvQdgHEmWJSYvbcp7f0r1StfgdKEIgGATJNiQQBDswYjN5pLsHWlHIymrKoHKZVZlXWYWQMztnbz33nvvvffee++997o7nU4n99//P1xmZAFs9s5K2smeIYCqyB8/fnwfPyJOprvT6dbJneXecrq1nO4td++cbH325Z0X03v0+XQ6vfdi/+Tky5OTffr82R3637P/B6K0ChEzAAAA
88FE66AB5AD257889026BCD6DCBD0EFC	1	cxsmiles	JChemExcelKwAAAB+LCAAAAAAABADtvQdgHEmWJSYvbcp7f0r1StfgdKEIgGATJNiQQBDswYjN5pLsHWlHIymrKoHKZVZlXWYWQMztnbz33nvvvffee++997o7nU4n99//P1xmZAFs9s5K2smeIYCqyB8/fnwfPyJOXpxsffblnenudLo1bXbvvMZf+P+LvZOTF1snJ3t3pvem9Czv/T8o8B4TKwAAAA==
E71EFB18B88877B75308C34FC64700BF	1	cxsmiles	JChemExcelIwAAAB+LCAAAAAAABADtvQdgHEmWJSYvbcp7f0r1StfgdKEIgGATJNiQQBDswYjN5pLsHWlHIymrKoHKZVZlXWYWQMztnbz33nvvvffee++997o7nU4n99//P1xmZAFs9s5K2smeIYCqyB8/fnwfPyJOTk62Xk93q+neFM/ecvfOydZnX955Mb23XE63Tu409/4fJK0QQyMAAAA=
28FE6BD88A8708BFF509CAFCF89AC474	1	cxsmiles	JChemExcelHwAAAB+LCAAAAAAABADtvQdgHEmWJSYvbcp7f0r1StfgdKEIgGATJNiQQBDswYjN5pLsHWlHIymrKoHKZVZlXWYWQMztnbz33nvvvffee++997o7nU4n99//P1xmZAFs9s5K2smeIYCqyB8/fnwfPyJenGx99uWdky+nu9PpdGs63b0z3ZPf9u6c/PiL/wdPfRITHwAAAA==
AB25CEDE5258E40B788D9CF9191F17F3	1	cxsmiles	JChemExcelIQAAAB+LCAAAAAAABADtvQdgHEmWJSYvbcp7f0r1StfgdKEIgGATJNiQQBDswYjN5pLsHWlHIymrKoHKZVZlXWYWQMztnbz33nvvvffee++997o7nU4n99//P1xmZAFs9s5K2smeIYCqyB8/fnwfPyK+/Oxk68XJyXR3Ol1uLXfvTPemePbunNw7wXPv/wFgwoEbIQAAAA==
56B0AC4DF005FFDE88D82148836F1DC7	1	cxsmiles	JChemExcelPgAAAB+LCAAAAAAABADtvQdgHEmWJSYvbcp7f0r1StfgdKEIgGATJNiQQBDswYjN5pLsHWlHIymrKoHKZVZlXWYWQMztnbz33nvvvffee++997o7nU4n99//P1xmZAFs9s5K2smeIYCqyB8/fnwfPyJOTnZPvjzZ2zo5eUH/37tzcu+zFydbn315Z7o/nW7hf/uv79353otPvo8Pv/fl9vfvnGw9u0P/e3bny93/B2j7Seo+AAAA
09E3161FD1605F5359146D00E5DA1CB8	1	cxsmiles	JChemExcelGgAAAB+LCAAAAAAABADtvQdgHEmWJSYvbcp7f0r1StfgdKEIgGATJNiQQBDswYjN5pLsHWlHIymrKoHKZVZlXWYWQMztnbz33nvvvffee++997o7nU4n99//P1xmZAFs9s5K2smeIYCqyB8/fnwfPyJOTr538nt++/tbJ1/eeXFy8kL/OLlz8uX/A2RVrx0aAAAA
6288F7D0913D8E183C0386E259536B1D	1	cxsmiles	JChemExcelJgAAAB+LCAAAAAAABADtvQdgHEmWJSYvbcp7f0r1StfgdKEIgGATJNiQQBDswYjN5pLsHWlHIymrKoHKZVZlXWYWQMztnbz33nvvvffee++997o7nU4n99//P1xmZAFs9s5K2smeIYCqyB8/fnwfPyJOvpzuTqfTveV06+TOdLr15cnJ1mdf3nlxMr03xXPvznRvuvv/AO8m5FgmAAAA
EFCF52A3F6A683E11662E1E5F1147354	1	cxsmiles	JChemExcelLQAAAB+LCAAAAAAABADtvQdgHEmWJSYvbcp7f0r1StfgdKEIgGATJNiQQBDswYjN5pLsHWlHIymrKoHKZVZlXWYWQMztnbz33nvvvffee++997o7nU4n99//P1xmZAFs9s5K2smeIYCqyB8/fnwfPyJOyunudDrdmk5377ze+uzLO/j/i72TkxdbJyd7d062Pnt958XJ9F5Fje79PzyhPsotAAAA
C4E56B7BB94363E0E777C363324B98BE	1	cxsmiles	JChemExcelJQAAAB+LCAAAAAAABADtvQdgHEmWJSYvbcp7f0r1StfgdKEIgGATJNiQQBDswYjN5pLsHWlHIymrKoHKZVZlXWYWQMztnbz33nvvvffee++997o7nU4n99//P1xmZAFs9s5K2smeIYCqyB8/fnwfPyJOprvT6XTve8tvf3+6dXLv5OTkxcm9O9Ot6f50upxO9+9M96a7/w9SEKmvJQAAAA==
C5C024F9144E4226F610FCD57C0C4D9F	1	cxsmiles	JChemExcelJwAAAB+LCAAAAAAABADtvQdgHEmWJSYvbcp7f0r1StfgdKEIgGATJNiQQBDswYjN5pLsHWlHIymrKoHKZVZlXWYWQMztnbz33nvvvffee++997o7nU4n99//P1xmZAFs9s5K2smeIYCqyB8/fnwfPyJOvjw52Tq58+Jk67Mv75y8nu4up8vpXjPdmk539+5sT3eneHb/H2vzXWAnAAAA
035A10A7B99EE486CAD6CD8C021D34B6	1	cxsmiles	JChemExcelIwAAAB+LCAAAAAAABADtvQdgHEmWJSYvbcp7f0r1StfgdKEIgGATJNiQQBDswYjN5pLsHWlHIymrKoHKZVZlXWYWQMztnbz33nvvvffee++997o7nU4n99//P1xmZAFs9s5K2smeIYCqyB8/fnwfPyJOvpzuTvHsfnlCz3JvurWc3uNP9u7dOdk/Odn/fwDJHYG6IwAAAA==
3E761C7292517E8B376F2C7B3AEC5AF2	1	cxsmiles	JChemExcelKgAAAB+LCAAAAAAABADtvQdgHEmWJSYvbcp7f0r1StfgdKEIgGATJNiQQBDswYjN5pLsHWlHIymrKoHKZVZlXWYWQMztnbz33nvvvffee++997o7nU4n99//P1xmZAFs9s5K2smeIYCqyB8/fnwfPyJOTrZOtj778s6L6e50Ot2rplvL6d509842/l5O6Tf+Yjrd/X8AXS5l3ioAAAA=
A8D0F8FB969AED0352ACCE65A9DBC1BF	1	cxsmiles	JChemExcelLwAAAB+LCAAAAAAABADtvQdgHEmWJSYvbcp7f0r1StfgdKEIgGATJNiQQBDswYjN5pLsHWlHIymrKoHKZVZlXWYWQMztnbz33nvvvffee++997o7nU4n99//P1xmZAFs9s5K2smeIYCqyB8/fnwfPyJOprvT6d5yuvXiZOuzL++cbJ3cof+d3KFPTso79M0ut5C/prv/D++ZnjUvAAAA
C366D9E71FD601E4A85FB2A8DFFB6C62	1	cxsmiles	JChemExcelJAAAAB+LCAAAAAAABADtvQdgHEmWJSYvbcp7f0r1StfgdKEIgGATJNiQQBDswYjN5pLsHWlHIymrKoHKZVZlXWYWQMztnbz33nvvvffee++997o7nU4n99//P1xmZAFs9s5K2smeIYCqyB8/fnwfPyJOvpzuTqfTrS9Ptk7unGx99uWdF9M9fHBS3plO907on93/Bxyeeh8kAAAA
6F814EE11B1BF33143AE6DC6D392B240	1	cxsmiles	JChemExcelJAAAAB+LCAAAAAAABADtvQdgHEmWJSYvbcp7f0r1StfgdKEIgGATJNiQQBDswYjN5pLsHWlHIymrKoHKZVZlXWYWQMztnbz33nvvvffee++997o7nU4n99//P1xmZAFs9s5K2smeIYCqyB8/fnwfPyJOyunudDrdOnmxd3LyYuvkZO/OydZnX955cTK9V9EX9+40u/8P4ThWkSQAAAA=
63D67CDAD0BD42CB2C23D2BC360700CC	1	cxsmiles	JChemExcelIQAAAB+LCAAAAAAABADtvQdgHEmWJSYvbcp7f0r1StfgdKEIgGATJNiQQBDswYjN5pLsHWlHIymrKoHKZVZlXWYWQMztnbz33nvvvffee++997o7nU4n99//P1xmZAFs9s5K2smeIYCqyB8/fnwfPyJOtl5Md5fLvenWdDnda3bvTO9Np9Pm3p2T/ZOTL09O9v8fjFuvDSEAAAA=
F307460CB0405E42C508E9363A630D73	1	cxsmiles	JChemExcelJgAAAB+LCAAAAAAABADtvQdgHEmWJSYvbcp7f0r1StfgdKEIgGATJNiQQBDswYjN5pLsHWlHIymrKoHKZVZlXWYWQMztnbz33nvvvffee++997o7nU4n99//P1xmZAFs9s5K2smeIYCqyB8/fnwfPyK+/Oxk68XJdHdaTae7d17snZy82DqZ3ptOp/tfnnw53Z/eu3Nysvf/ANSg7J4mAAAA
208CD7BC0A8B558BBE0793C3EE25A80D	1	cxsmiles	JChemExcelMAAAAB+LCAAAAAAABADtvQdgHEmWJSYvbcp7f0r1StfgdKEIgGATJNiQQBDswYjN5pLsHWlHIymrKoHKZVZlXWYWQMztnbz33nvvvffee++997o7nU4n99//P1xmZAFs9s5K2smeIYCqyB8/fnwfPyJOvpzuTqfTvSX9s/XiZOuzL++c3Ds5ebF1cjLdx2cn5Z3pdP/Oycm9O9Rq9/8B4BPpWjAAAAA=
8AD70CF0B6D0BE5D3C440EE0FC8BF864	1	cxsmiles	JChemExcelLAAAAB+LCAAAAAAABADtvQdgHEmWJSYvbcp7f0r1StfgdKEIgGATJNiQQBDswYjN5pLsHWlHIymrKoHKZVZlXWYWQMztnbz33nvvvffee++997o7nU4n99//P1xmZAFs9s5K2smeIYCqyB8/fnwfPyJOTrZeTHeXy+l0a7l7Z7o3pV+m0707J1vP7tD/nt2Z3psut07uLKf3Tv4fhKvVYywAAAA=
7248A7E72D7A22E3F0FF732B39417160	1	cxsmiles	JChemExcelOQAAAB+LCAAAAAAABADtvQdgHEmWJSYvbcp7f0r1StfgdKEIgGATJNiQQBDswYjN5pLsHWlHIymrKoHKZVZlXWYWQMztnbz33nvvvffee++997o7nU4n99//P1xmZAFs9s5K2smeIYCqyB8/fnwfPyJOvjzZ+uzLO9PdKT171XRrOd3duzO9hz+3vjyh315Ig336u1ru35nex1fT+/8P0+138jkAAAA=
A245B7FD8328396C1135D75E1280D341	1	cxsmiles	JChemExcelLwAAAB+LCAAAAAAABADtvQdgHEmWJSYvbcp7f0r1StfgdKEIgGATJNiQQBDswYjN5pLsHWlHIymrKoHKZVZlXWYWQMztnbz33nvvvffee++997o7nU4n99//P1xmZAFs9s5K2smeIYCqyB8/fnwfPyJeTHeX0+nWdLo73ZvSL8vp3p2TrWd36H/P7kzvyUf37Ef/DxEWyHQvAAAA
78787E44BAAB905C2339A2C54AEAC12C	1	cxsmiles	JChemExcelMwAAAB+LCAAAAAAABADtvQdgHEmWJSYvbcp7f0r1StfgdKEIgGATJNiQQBDswYjN5pLsHWlHIymrKoHKZVZlXWYWQMztnbz33nvvvffee++997o7nU4n99//P1xmZAFs9s5K2smeIYCqyB8/fnwfPyJOTnY/O9k6OTnZ+uzLO1/ekR/TvenWyZ3p1pcn03tT/pX/uUc/p7t7/w+2d2kJMwAAAA==
EDFA2ED178A07E86E2752ED84A5CB1A8	1	cxsmiles	JChemExcelIAAAAB+LCAAAAAAABADtvQdgHEmWJSYvbcp7f0r1StfgdKEIgGATJNiQQBDswYjN5pLsHWlHIymrKoHKZVZlXWYWQMztnbz33nvvvffee++997o7nU4n99//P1xmZAFs9s5K2smeIYCqyB8/fnwfPyJOvpzuTqdby+nelH6c3Jluvbgz3d27c7L17A7979n/A4TVDT0gAAAA
E8DF16D9F05F30D64972CC21567341D2	1	cxsmiles	JChemExcelMAAAAB+LCAAAAAAABADtvQdgHEmWJSYvbcp7f0r1StfgdKEIgGATJNiQQBDswYjN5pLsHWlHIymrKoHKZVZlXWYWQMztnbz33nvvvffee++997o7nU4n99//P1xmZAFs9s5K2smeIYCqyB8/fnwfPyJOvvx9Tz472fp9T7Y++/LOlyd37k53p3h2v5zuTadbX07v8Z/3Tn78xZ3ldLn3/wB86Q/QMAAAAA==
C6A3CC8FFF606E8E341B2D58DDCFBA06	1	cxsmiles	JChemExcelMAAAAB+LCAAAAAAABADtvQdgHEmWJSYvbcp7f0r1StfgdKEIgGATJNiQQBDswYjN5pLsHWlHIymrKoHKZVZlXWYWQMztnbz33nvvvffee++997o7nU4n99//P1xmZAFs9s5K2smeIYCqyB8/fnwfPyJOTrZO7tD/prvT6Rb+t3vnZOuzL++8mO5Np9PldM/8eY//vPf/AEH2jMgwAAAA
CA329A2E8B14CF24BE2CA6F4B77D10D0	1	cxsmiles	JChemExcelNwAAAB+LCAAAAAAABADtvQdgHEmWJSYvbcp7f0r1StfgdKEIgGATJNiQQBDswYjN5pLsHWlHIymrKoHKZVZlXWYWQMztnbz33nvvvffee++997o7nU4n99//P1xmZAFs9s5K2smeIYCqyB8/fnwfPyK+PNn67Ms7090pPXvVdGs53d27M72HP7fo83sv5Pt9+rNa7t+Z3sc30/v/D/kpyBw3AAAA
07161A4B51F8BFEB15B1ABCC0F277525	1	cxsmiles	JChemExcelQwAAAB+LCAAAAAAABADtvQdgHEmWJSYvbcp7f0r1StfgdKEIgGATJNiQQBDswYjN5pLsHWlHIymrKoHKZVZlXWYWQMztnbz33nvvvffee++997o7nU4n99//P1xmZAFs9s5K2smeIYCqyB8/fnwfPyJOTnY/O9k6uXOy9YL+t/dC/vjsZI/+PLn32Qn9uvV667Mv72y92Dqhb07u0O/04T38/OzF7p3Pvvx/AH08lktDAAAA
124B67DDD2D10F44376018C5FB69707B	1	cxsmiles	JChemExcelJQAAAB+LCAAAAAAABADtvQdgHEmWJSYvbcp7f0r1StfgdKEIgGATJNiQQBDswYjN5pLsHWlHIymrKoHKZVZlXWYWQMztnbz33nvvvffee++997o7nU4n99//P1xmZAFs9s5K2smeIYCqyB8/fnwfPyJOyunudDrdmk537yz36JeTL6f3ptPldH+K597+neVy7/8Bm5eySSUAAAA=
71AB672CE01DB5E694960ACAC27900D8	1	cxsmiles	JChemExcelMQAAAB+LCAAAAAAABADtvQdgHEmWJSYvbcp7f0r1StfgdKEIgGATJNiQQBDswYjN5pLsHWlHIymrKoHKZVZlXWYWQMztnbz33nvvvffee++997o7nU4n99//P1xmZAFs9s5K2smeIYCqyB8/fnwfPyJOvpzuTqfTrely9850b7qc3sNfL06m+/zpdP/O663PvryD/7+4s1zu3ft/AOx3Ex8xAAAA
B8D340B1EE5885C6E99BA528441333EF	1	cxsmiles	JChemExcelLgAAAB+LCAAAAAAABADtvQdgHEmWJSYvbcp7f0r1StfgdKEIgGATJNiQQBDswYjN5pLsHWlHIymrKoHKZVZlXWYWQMztnbz33nvvvffee++997o7nU4n99//P1xmZAFs9s5K2smeIYCqyB8/fnwfPyJevN767Ms7+P90d7qcTremu3eme9Pp9B79QX/tT5ffW377+9P9O/TJ3v8Dd0A2dy4AAAA=
1D1BD4C4B1C54225D98AE03396588AE7	1	cxsmiles	JChemExcelMQAAAB+LCAAAAAAABADtvQdgHEmWJSYvbcp7f0r1StfgdKEIgGATJNiQQBDswYjN5pLsHWlHIymrKoHKZVZlXWYWQMztnbz33nvvvffee++997o7nU4n99//P1xmZAFs9s5K2smeIYCqyB8/fnwfPyJOTrZO7mydvLgz3V1Ot6Z70+l066S8M9368s50j358b/nt7+/emd6bTunrF3eW9/4fJb5CzTEAAAA=
F26E1AA01A4DDACAEC181BFC205F35D8	1	cxsmiles	JChemExcelMAAAAB+LCAAAAAAABADtvQdgHEmWJSYvbcp7f0r1StfgdKEIgGATJNiQQBDswYjN5pLsHWlHIymrKoHKZVZlXWYWQMztnbz33nvvvffee++997o7nU4n99//P1xmZAFs9s5K2smeIYCqyB8/fnwfPyJOTr6c7k7x7L442Tq5c7L12Zd3Xkz3ptMt+mzvxT1qcHJyjz5/dof+9+z/AT7m+7owAAAA
39F968877BF9FB052B916EB7F160D4F5	1	cxsmiles	JChemExcelNgAAAB+LCAAAAAAABADtvQdgHEmWJSYvbcp7f0r1StfgdKEIgGATJNiQQBDswYjN5pLsHWlHIymrKoHKZVZlXWYWQMztnbz33nvvvffee++997o7nU4n99//P1xmZAFs9s5K2smeIYCqyB8/fnwfPyJOTrZOtl6f7H724uSzk5PPXuze+exk7+TOZy9e7J1svTi5hw+5zbM79L9n9O29O599+f8AMIkrLzYAAAA=
40E1C0B616B2B94A3C74DD86AB7EB42D	1	cxsmiles	JChemExcelLAAAAB+LCAAAAAAABADtvQdgHEmWJSYvbcp7f0r1StfgdKEIgGATJNiQQBDswYjN5pLsHWlHIymrKoHKZVZlXWYWQMztnbz33nvvvffee++997o7nU4n99//P1xmZAFs9s5K2smeIYCqyB8/fnwfPyKenWw9u0P/m+4up3tTepZ7092Trc++vPPiZHpvOt06Ke/ov/f+HxeDqSwsAAAA
C57E752822D0E34C2F493B7FDF44BB24	1	cxsmiles	JChemExcelNQAAAB+LCAAAAAAABADtvQdgHEmWJSYvbcp7f0r1StfgdKEIgGATJNiQQBDswYjN5pLsHWlHIymrKoHKZVZlXWYWQMztnbz33nvvvffee++997o7nU4n99//P1xmZAFs9s5K2smeIYCqyB8/fnwfPyK+9+X297/34pPvb3325Z3p7nS5d/K9k9/z9/z297dOvpzuLXfvfHkyvTedTre+PNl6dof+9+zOdHrv/wGYdxizNQAAAA==
88D33C5AF0E398B081331244E2482A35	1	cxsmiles	JChemExcelNwAAAB+LCAAAAAAABADtvQdgHEmWJSYvbcp7f0r1StfgdKEIgGATJNiQQBDswYjN5pLsHWlHIymrKoHKZVZlXWYWQMztnbz33nvvvffee++997o7nU4n99//P1xmZAFs9s5K2smeIYCqyB8/fnwfPyJOXmxNd6fT6dazO9Pp7p3XW599eQf/n+7hw5PyznRrunfnBB+9mN6b8od3lvf+H7vIMAc3AAAA
3DF89D54B16AE2703B6236F289CB8D44	1	cxsmiles	JChemExcelIgAAAB+LCAAAAAAABADtvQdgHEmWJSYvbcp7f0r1StfgdKEIgGATJNiQQBDswYjN5pLsHWlHIymrKoHKZVZlXWYWQMztnbz33nvvvffee++997o7nU4n99//P1xmZAFs9s5K2smeIYCqyB8/fnwfPyKeTXen0+nedOukvDPdaui33TsnW599eefFyb3PXpycvL73/wDZ+xQqIgAAAA==
2CEF2416B5451D143023A05CE9E570CC	1	cxsmiles	JChemExcelJwAAAB+LCAAAAAAABADtvQdgHEmWJSYvbcp7f0r1StfgdKEIgGATJNiQQBDswYjN5pLsHWlHIymrKoHKZVZlXWYWQMztnbz33nvvvffee++997o7nU4n99//P1xmZAFs9s5K2smeIYCqyB8/fnwfPyJenGx99uLOdHc6nW59eYLny+ke/phO9+7wd/TtdPf/Aae2SIYnAAAA
B60D75B07530B2B8B98ABA074A40E67D	1	cxsmiles	JChemExcelIQAAAB+LCAAAAAAABADtvQdgHEmWJSYvbcp7f0r1StfgdKEIgGATJNiQQBDswYjN5pLsHWlHIymrKoHKZVZlXWYWQMztnbz33nvvvffee++997o7nU4n99//P1xmZAFs9s5K2smeIYCqyB8/fnwfPyJOyunudDrdOnmxd3LyYuvkZO/Oyb3PXtDv9+5Mp7sn5f8D3WL+7iEAAAA=
485C781E2D5D29096FCFC95266D0FEFC	1	cxsmiles	JChemExcelKgAAAB+LCAAAAAAABADtvQdgHEmWJSYvbcp7f0r1StfgdKEIgGATJNiQQBDswYjN5pLsHWlHIymrKoHKZVZlXWYWQMztnbz33nvvvffee++997o7nU4n99//P1xmZAFs9s5K2smeIYCqyB8/fnwfPyJOTl6cbH325Z2TrZM7L6a7y+nWcrrXTOkv/v/u3p3pvel0upze+38AWjYP+ioAAAA=
AD390AB6E1D9866EFB384DCF247C7D27	1	cxsmiles	JChemExcelKQAAAB+LCAAAAAAABADtvQdgHEmWJSYvbcp7f0r1StfgdKEIgGATJNiQQBDswYjN5pLsHWlHIymrKoHKZVZlXWYWQMztnbz33nvvvffee++997o7nU4n99//P1xmZAFs9s5K2smeIYCqyB8/fnwfPyJOTnbxv63Pvrzz4mTv5OTF1snJPfo/PffuTPenePbvnJzs/T8ewBrXKQAAAA==
3042207D460A738402B4A5440137123B	1	cxsmiles	JChemExcelHwAAAB+LCAAAAAAABADtvQdgHEmWJSYvbcp7f0r1StfgdKEIgGATJNiQQBDswYjN5pLsHWlHIymrKoHKZVZlXWYWQMztnbz33nvvvffee++997o7nU4n99//P1xmZAFs9s5K2smeIYCqyB8/fnwfPyJOprvT6XRvOd06Ke/QPy9Opvfog+beHfp0uvv/APsJxnUfAAAA
66F5D666B9A4CB3A882B9A4397918C90	1	cxsmiles	JChemExcelJgAAAB+LCAAAAAAABADtvQdgHEmWJSYvbcp7f0r1StfgdKEIgGATJNiQQBDswYjN5pLsHWlHIymrKoHKZVZlXWYWQMztnbz33nvvvffee++997o7nU4n99//P1xmZAFs9s5K2smeIYCqyB8/fnwfPyJOyunudDrdOjl5Md2jn8vpveV0udy7d2e6P8Wzf2c63f1/AL8sTMEmAAAA
F1F22776678A5FB09C8405D712E479AE	1	cxsmiles	JChemExcelKgAAAB+LCAAAAAAABADtvQdgHEmWJSYvbcp7f0r1StfgdKEIgGATJNiQQBDswYjN5pLsHWlHIymrKoHKZVZlXWYWQMztnbz33nvvvffee++997o7nU4n99//P1xmZAFs9s5K2smeIYCqyB8/fnwfPyJOTr482frsyzvT3el0q1ru3pnuTZvp1ovpvenWyZ2p/HPv5M5y7/8BrewlbioAAAA=
A7311B1A95BFB18DCDAAE7FB08D2BE46	1	cxsmiles	JChemExcelJQAAAB+LCAAAAAAABADtvQdgHEmWJSYvbcp7f0r1StfgdKEIgGATJNiQQBDswYjN5pLsHWlHIymrKoHKZVZlXWYWQMztnbz33nvvvffee++997o7nU4n99//P1xmZAFs9s5K2smeIYCqyB8/fnwfPyJOXpxsffblnZPdk+neFM/ei135ZHqP/tp6dmc6vff/AGyKdPclAAAA
2F358F79497D3EF35D4AC891300046C4	1	cxsmiles	JChemExcelKgAAAB+LCAAAAAAABADtvQdgHEmWJSYvbcp7f0r1StfgdKEIgGATJNiQQBDswYjN5pLsHWlHIymrKoHKZVZlXWYWQMztnbz33nvvvffee++997o7nU4n99//P1xmZAFs9s5K2smeIYCqyB8/fnwfPyJOTrZO7tD/Tl7snmx99oL+2v3syztb070pnr0703v8y707L/4fdFNSPCoAAAA=
57DFE31BD098C3B6E2EE7F8A3AF51F12	1	cxsmiles	JChemExcelJQAAAB+LCAAAAAAABADtvQdgHEmWJSYvbcp7f0r1StfgdKEIgGATJNiQQBDswYjN5pLsHWlHIymrKoHKZVZlXWYWQMztnbz33nvvvffee++997o7nU4n99//P1xmZAFs9s5K2smeIYCqyB8/fnwfPyK+/Oxk68V0d7qc7k3x7E1370zv4bet6b07y/3pcrnc/38AhShlJCUAAAA=
5BF359ACEAA47F7D22A341EF237BA2FD	1	cxsmiles	JChemExcelKAAAAB+LCAAAAAAABADtvQdgHEmWJSYvbcp7f0r1StfgdKEIgGATJNiQQBDswYjN5pLsHWlHIymrKoHKZVZlXWYWQMztnbz33nvvvffee++997o7nU4n99//P1xmZAFs9s5K2smeIYCqyB8/fnwfPyJOvpzuTqfTrS9P7ky3XpxM9+iPe0v69Q7/M7033Tsp70x3/x8n7ILHKAAAAA==
344121D464C1655596F9CCE651BEC5AC	1	cxsmiles	JChemExcelQwAAAB+LCAAAAAAABADtvQdgHEmWJSYvbcp7f0r1StfgdKEIgGATJNiQQBDswYjN5pLsHWlHIymrKoHKZVZlXWYWQMztnbz33nvvvffee++997o7nU4n99//P1xmZAFs9s5K2smeIYCqyB8/fnwfPyJOvvzeye/5e377+1snW599eefF7sl073vLb39/Od16wZ9M702n063p9N6dF/snJy+2Tu6cnOzfme6d7N6Z3p/iuf//AJIihKlDAAAA
B47B1A62566A95CA5B7D4EBFBDEB3A49	1	cxsmiles	JChemExcelLwAAAB+LCAAAAAAABADtvQdgHEmWJSYvbcp7f0r1StfgdKEIgGATJNiQQBDswYjN5pLsHWlHIymrKoHKZVZlXWYWQMztnbz33nvvvffee++997o7nU4n99//P1xmZAFs9s5K2smeIYCqyB8/fnwfPyJOvpzuTqfTrSn92Jsut5bLvTvTe1P+6N6dk/3PXpycvNi/c3Kff7n//wBKMcAOLwAAAA==
BD06163D479370F7EF0BF507F7FF88A5	1	cxsmiles	JChemExcelKgAAAB+LCAAAAAAABADtvQdgHEmWJSYvbcp7f0r1StfgdKEIgGATJNiQQBDswYjN5pLsHWlHIymrKoHKZVZlXWYWQMztnbz33nvvvffee++997o7nU4n99//P1xmZAFs9s5K2smeIYCqyB8/fnwfPyJOtl7snpx8eXKye2e6N51uLb+3/Pb39+5M703pjy+n+1M8+3em03v/D/llLuoqAAAA
976EA69C3BA5C781E921AB729E4A08A3	1	cxsmiles	JChemExcelLgAAAB+LCAAAAAAABADtvQdgHEmWJSYvbcp7f0r1StfgdKEIgGATJNiQQBDswYjN5pLsHWlHIymrKoHKZVZlXWYWQMztnbz33nvvvffee++997o7nU4n99//P1xmZAFs9s5K2smeIYCqyB8/fnwfPyJOTrZO7kx3p9Pp1ouTrc++vHPy5cneZ/TpZ/TFj7+4w5+92Du5Q62mu/8PS884Ui4AAAA=
513A101C770AA657A78E9BFC175A05EE	1	cxsmiles	JChemExcelKAAAAB+LCAAAAAAABADtvQdgHEmWJSYvbcp7f0r1StfgdKEIgGATJNiQQBDswYjN5pLsHWlHIymrKoHKZVZlXWYWQMztnbz33nvvvffee++997o7nU4n99//P1xmZAFs9s5K2smeIYCqyB8/fnwfPyJOvpzuTqd7y+lyuvXi5N7JyYutk+n+FM/+nZOTe3eme9Pp7pcn/w98YO40KAAAAA==
6A28240E0D3A9BF35FD0097C6FC34067	1	cxsmiles	JChemExcelKgAAAB+LCAAAAAAABADtvQdgHEmWJSYvbcp7f0r1StfgdKEIgGATJNiQQBDswYjN5pLsHWlHIymrKoHKZVZlXWYWQMztnbz33nvvvffee++997o7nU4n99//P1xmZAFs9s5K2smeIYCqyB8/fnwfPyJOOs+XL7c++/LO1ve+3P7+nS9PTr734pPvb53cof+d/D/piyIvKgAAAA==
801887DEA4FC181DA1E0858171EEEE53	1	cxsmiles	JChemExcelIQAAAB+LCAAAAAAABADtvQdgHEmWJSYvbcp7f0r1StfgdKEIgGATJNiQQBDswYjN5pLsHWlHIymrKoHKZVZlXWYWQMztnbz33nvvvffee++997o7nU4n99//P1xmZAFs9s5K2smeIYCqyB8/fnwfPyK+/Oxk68XJyXR32ky3lrt3pntTPHt3pvf4l3v/D/QQ2dohAAAA
B2EBEC94CD24FEA957F5D30E728A6827	1	cxsmiles	JChemExcelFQAAAB+LCAAAAAAABADtvQdgHEmWJSYvbcp7f0r1StfgdKEIgGATJNiQQBDswYjN5pLsHWlHIymrKoHKZVZlXWYWQMztnbz33nvvvffee++997o7nU4n99//P1xmZAFs9s5K2smeIYCqyB8/fnwfPyJenNCz9eLO1snWszvP7pxsffblnS//HxvCRVUVAAAA
E39506438D674C2F43ECEEE55F303C06	1	cxsmiles	JChemExcelKgAAAB+LCAAAAAAABADtvQdgHEmWJSYvbcp7f0r1StfgdKEIgGATJNiQQBDswYjN5pLsHWlHIymrKoHKZVZlXWYWQMztnbz33nvvvffee++997o7nU4n99//P1xmZAFs9s5K2smeIYCqyB8/fnwfPyK+/Oxk98XWyXRvOr03xXOv2btzcrJ/gg/v8yf36e8Xu/v/Dz9tBwEqAAAA
B970C6CF7D5E4D9D388E138DA2F57565	1	cxsmiles	JChemExcelHgAAAB+LCAAAAAAABADtvQdgHEmWJSYvbcp7f0r1StfgdKEIgGATJNiQQBDswYjN5pLsHWlHIymrKoHKZVZlXWYWQMztnbz33nvvvffee++997o7nU4n99//P1xmZAFs9s5K2smeIYCqyB8/fnwfPyJOTk62Pvvyzovp7hTPrv61hz+We/8PnJ+E2B4AAAA=
3590D406E38633E4D2758B4666D2DFC4	1	cxsmiles	JChemExcelNAAAAB+LCAAAAAAABADtvQdgHEmWJSYvbcp7f0r1StfgdKEIgGATJNiQQBDswYjN5pLsHWlHIymrKoHKZVZlXWYWQMztnbz33nvvvffee++997o7nU4n99//P1xmZAFs9s5K2smeIYCqyB8/fnwfPyJOTl5snZzceb312Zd38P/p7nQ63Top70y3prt3TvDRi+kefXZvSR/faab3pnv/D3+a/vg0AAAA
512734CBDFB9E942A9FFDA37A5C189D8	1	cxsmiles	JChemExcelJgAAAB+LCAAAAAAABADtvQdgHEmWJSYvbcp7f0r1StfgdKEIgGATJNiQQBDswYjN5pLsHWlHIymrKoHKZVZlXWYWQMztnbz33nvvvffee++997o7nU4n99//P1xmZAFs9s5K2smeIYCqyB8/fnwfPyJOprvL5dbJdG+KZ+/OdOukvDPdPdn67Ms7L07unfBz7/8BIFkvfyYAAAA=
5E4ABCDF406E6EA8D4F44924C8C541E1	1	cxsmiles	JChemExcelJgAAAB+LCAAAAAAABADtvQdgHEmWJSYvbcp7f0r1StfgdKEIgGATJNiQQBDswYjN5pLsHWlHIymrKoHKZVZlXWYWQMztnbz33nvvvffee++997o7nU4n99//P1xmZAFs9s5K2smeIYCqyB8/fnwfPyK+/Oxk68XJ7gme3Tsv9k5OXmydTO9Np9P9L0++nO5P7905Odn7fwCrNuxxJgAAAA==
20B8091C12C85B5E54C785AB667AFEBB	1	cxsmiles	JChemExcelIwAAAB+LCAAAAAAABADtvQdgHEmWJSYvbcp7f0r1StfgdKEIgGATJNiQQBDswYjN5pLsHWlHIymrKoHKZVZlXWYWQMztnbz33nvvvffee++997o7nU4n99//P1xmZAFs9s5K2smeIYCqyB8/fnwfPyK+9+X297/34pPvb3325Z3p7nI6Xe6enOCPFyfTvSmevf8H7gE3vCMAAAA=
2EFF199E5FBAD18E595791239C6107EC	1	cxsmiles	JChemExcelIwAAAB+LCAAAAAAABADtvQdgHEmWJSYvbcp7f0r1StfgdKEIgGATJNiQQBDswYjN5pLsHWlHIymrKoHKZVZlXWYWQMztnbz33nvvvffee++997o7nU4n99//P1xmZAFs9s5K2smeIYCqyB8/fnwfPyJenGx99uWd6e50ujWdTne/PDn5cro3xbN3Z3pvOm2m9/4fzEJ49CMAAAA=
0CF57A349C555B5A187FBBB10089532B	1	cxsmiles	JChemExcelJgAAAB+LCAAAAAAABADtvQdgHEmWJSYvbcp7f0r1StfgdKEIgGATJNiQQBDswYjN5pLsHWlHIymrKoHKZVZlXWYWQMztnbz33nvvvffee++997o7nU4n99//P1xmZAFs9s5K2smeIYCqyB8/fnwfPyJOTk6Wu8vldOvFydZnX945+XK6N51Ot6bTvTsn907w3Luz3P1/AO8CHs8mAAAA
8F64EEF9CD7413D7D7EB8304193AD733	1	cxsmiles	JChemExcelLQAAAB+LCAAAAAAABADtvQdgHEmWJSYvbcp7f0r1StfgdKEIgGATJNiQQBDswYjN5pLsHWlHIymrKoHKZVZlXWYWQMztnbz33nvvvffee++997o7nU4n99//P1xmZAFs9s5K2smeIYCqyB8/fnwfPyK+/Oxk68XuycmLrZPp3nQ6vfflyZfTe9O9Oycnu3em+99bfvv7y+n9E3qm+/f/H9A/lQwtAAAA
EF0C7DAE321837DC17E6A62EED3E7E5F	1	cxsmiles	JChemExcelKAAAAB+LCAAAAAAABADtvQdgHEmWJSYvbcp7f0r1StfgdKEIgGATJNiQQBDswYjN5pLsHWlHIymrKoHKZVZlXWYWQMztnbz33nvvvffee++997o7nU4n99//P1xmZAFs9s5K2smeIYCqyB8/fnwfPyJOTrY++/LOi92TkxdbJye7d6a70+l068vpHn6clHem070v6Z/d/wew10/5KAAAAA==
2FBFA0B73F37A0B19A114DB3BB14F341	1	cxsmiles	JChemExcelKwAAAB+LCAAAAAAABADtvQdgHEmWJSYvbcp7f0r1StfgdKEIgGATJNiQQBDswYjN5pLsHWlHIymrKoHKZVZlXWYWQMztnbz33nvvvffee++997o7nU4n99//P1xmZAFs9s5K2smeIYCqyB8/fnwfPyJOvpzuTqfTrel09850j355cbL12Zd3pvfw4bM70+m9k5L+ne59efL/ALWY7u8rAAAA
6E8544D1FA8297C18593DD28D7067EF6	1	cxsmiles	JChemExcelMQAAAB+LCAAAAAAABADtvQdgHEmWJSYvbcp7f0r1StfgdKEIgGATJNiQQBDswYjN5pLsHWlHIymrKoHKZVZlXWYWQMztnbz33nvvvffee++997o7nU4n99//P1xmZAFs9s5K2smeIYCqyB8/fnwfPyJenGx99uLOi+nudDrdmk53T8o7070Kv+7dmd7Dhy8+O9miFnemW/ju3v8DRLXOQTEAAAA=
F6BE6B6A3908AAE1A52BC01E439C185B	1	cxsmiles	JChemExcelJQAAAB+LCAAAAAAABADtvQdgHEmWJSYvbcp7f0r1StfgdKEIgGATJNiQQBDswYjN5pLsHWlHIymrKoHKZVZlXWYWQMztnbz33nvvvffee++997o7nU4n99//P1xmZAFs9s5K2smeIYCqyB8/fnwfPyJOvpzuTqfTrel098uTO9O95XLrZOvkDv16bzldTrde0Gf3/h8IN1fZJQAAAA==
B2183238C29F18E42B870FCFD3A138B8	1	cxsmiles	JChemExcelKwAAAB+LCAAAAAAABADtvQdgHEmWJSYvbcp7f0r1StfgdKEIgGATJNiQQBDswYjN5pLsHWlHIymrKoHKZVZlXWYWQMztnbz33nvvvffee++997o7nU4n99//P1xmZAFs9s5K2smeIYCqyB8/fnwfPyJOvpzuTqdbL062PvvyzsnJ3mcvXmyd3OG/pvemePbu3aF/d0/K/wc+L9fmKwAAAA==
8E9561D2A71EC9BF97DD5C89CB7669FE	1	cxsmiles	JChemExcelKAAAAB+LCAAAAAAABADtvQdgHEmWJSYvbcp7f0r1StfgdKEIgGATJNiQQBDswYjN5pLsHWlHIymrKoHKZVZlXWYWQMztnbz33nvvvffee++997o7nU4n99//P1xmZAFs9s5K2smeIYCqyB8/fnwfPyJeTHeX0+V0b7o73TqZ3pvSs49/pvf27yyXeycn909OXpyc3P9/AM9tNBMoAAAA
2A22C48AC3DB9C807354BACD0B0BD5E6	1	cxsmiles	JChemExcelHQAAAB+LCAAAAAAABADtvQdgHEmWJSYvbcp7f0r1StfgdKEIgGATJNiQQBDswYjN5pLsHWlHIymrKoHKZVZlXWYWQMztnbz33nvvvffee++997o7nU4n99//P1xmZAFs9s5K2smeIYCqyB8/fnwfPyJOTrZO7pxsfTndndKzh3+mu3v0yWdf3vny/wEYkpNSHQAAAA==
3C1666CBF8A59F107596A9C228414AA3	1	cxsmiles	JChemExcelNwAAAB+LCAAAAAAABADtvQdgHEmWJSYvbcp7f0r1StfgdKEIgGATJNiQQBDswYjN5pLsHWlHIymrKoHKZVZlXWYWQMztnbz33nvvvffee++997o7nU4n99//P1xmZAFs9s5K2smeIYCqyB8/fnwfPyJOTrZO7tD/vjzZ+uzLOy92T05ebJ2c7N6Z7i2n0+nWcu/O9B5+ae7dme7jl5PyznS6//8ALUEmLzcAAAA=
8538C7B0633AFCFFB10B5D911153A8F6	1	cxsmiles	JChemExcelQQAAAB+LCAAAAAAABADtvQdgHEmWJSYvbcp7f0r1StfgdKEIgGATJNiQQBDswYjN5pLsHWlHIymrKoHKZVZlXWYWQMztnbz33nvvvffee++997o7nU4n99//P1xmZAFs9s5K2smeIYCqyB8/fnwfPyK+PPneye/57e/vfsk/tk62vryjH9xZ7k3vTafTrZPyzpR+259uLafL6d7+nen9avrpFM+n0/v/Dw02t7BBAAAA
AC16ADF86A062B2DDA79A8BE3AEE2A1A	1	cxsmiles	JChemExcelKQAAAB+LCAAAAAAABADtvQdgHEmWJSYvbcp7f0r1StfgdKEIgGATJNiQQBDswYjN5pLsHWlHIymrKoHKZVZlXWYWQMztnbz33nvvvffee++997o7nU4n99//P1xmZAFs9s5K2smeIYCqyB8/fnwfPyJOdk9ebJ2cfLl7Z7o3nW4tv7f89vf37kzvTemPL6f7Uzz7d6bTe/8PA/DPrikAAAA=
7ACEFF5D487F5D1E4151F09C2489B823	1	cxsmiles	JChemExcelGgAAAB+LCAAAAAAABADtvQdgHEmWJSYvbcp7f0r1StfgdKEIgGATJNiQQBDswYjN5pLsHWlHIymrKoHKZVZlXWYWQMztnbz33nvvvffee++997o7nU4n99//P1xmZAFs9s5K2smeIYCqyB8/fnwfPyJOTr482frsyzvT3WU13XpBP6d7Uzx7/w/C3R0DGgAAAA==
9799C69369FD1070D304E9C5C38FD244	1	cxsmiles	JChemExcelLwAAAB+LCAAAAAAABADtvQdgHEmWJSYvbcp7f0r1StfgdKEIgGATJNiQQBDswYjN5pLsHWlHIymrKoHKZVZlXWYWQMztnbz33nvvvffee++997o7nU4n99//P1xmZAFs9s5K2smeIYCqyB8/fnwfPyKeTXen0+nWdLp758XeycmLrZMT+ffHX9w52frsyztfnkzvTfHcu3Nysvf/AIoGt6cvAAAA
FC6FC4C7C1B2097987CC021B12BEF25F	1	cxsmiles	JChemExcelKgAAAB+LCAAAAAAABADtvQdgHEmWJSYvbcp7f0r1StfgdKEIgGATJNiQQBDswYjN5pLsHWlHIymrKoHKZVZlXWYWQMztnbz33nvvvffee++997o7nU4n99//P1xmZAFs9s5K2smeIYCqyB8/fnwfPyJOyunudDrdOinv0D9ffu/k9/z29/dO6KHf8Ovy3nS6nN67M939fwAByr9iKgAAAA==
00ADD1DE40599EB3840310F7DDF4D7AD	1	cxsmiles	JChemExcelKQAAAB+LCAAAAAAABADtvQdgHEmWJSYvbcp7f0r1StfgdKEIgGATJNiQQBDswYjN5pLsHWlHIymrKoHKZVZlXWYWQMztnbz33nvvvffee++997o7nU4n99//P1xmZAFs9s5K2smeIYCqyB8/fnwfPyJOdk9Otk5Ovty9M92bTreW31t++/t7d6b3pvTHl9P9KZ79O9Ppvf8HPAqWzykAAAA=
62AB472B5F04F29BC4FC388974A3D82D	1	cxsmiles	JChemExcelOgAAAB+LCAAAAAAABADtvQdgHEmWJSYvbcp7f0r1StfgdKEIgGATJNiQQBDswYjN5pLsHWlHIymrKoHKZVZlXWYWQMztnbz33nvvvffee++997o7nU4n99//P1xmZAFs9s5K2smeIYCqyB8/fnwfPyJOprvL5dbJnSn+v/vi9dZnX97B/6d79El5Zzrdmk738Mu96XRJf9y782L/5OTFycn+/wNEfyF5OgAAAA==
9A5EF5896408253AD86117AAA9CA8A99	1	cxsmiles	JChemExcelOQAAAB+LCAAAAAAABADtvQdgHEmWJSYvbcp7f0r1StfgdKEIgGATJNiQQBDswYjN5pLsHWlHIymrKoHKZVZlXWYWQMztnbz33nvvvffee++997o7nU4n99//P1xmZAFs9s5K2smeIYCqyB8/fnwfPyKeTXen9GydfDndw88X03vL6XK6z7+fbH325Z2TF/dPTr48Obl/Zzq9t0//7J2Ud6a7/w+hLmCDOQAAAA==
1EC444F9FDF0564B3A26E441DD542EDA	1	cxsmiles	JChemExcelLwAAAB+LCAAAAAAABADtvQdgHEmWJSYvbcp7f0r1StfgdKEIgGATJNiQQBDswYjN5pLsHWlHIymrKoHKZVZlXWYWQMztnbz33nvvvffee++997o7nU4n99//P1xmZAFs9s5K2smeIYCqyB8/fnwfPyJOdk9efHay9WL3znRvOp1uTad7d6b36Jdqee/OdH/Kn+3fObn/2YuTkxf3/x9tl0HBLwAAAA==
ABEE15121C926B7A8FB9C58955B9E338	1	cxsmiles	JChemExcelPAAAAB+LCAAAAAAABADtvQdgHEmWJSYvbcp7f0r1StfgdKEIgGATJNiQQBDswYjN5pLsHWlHIymrKoHKZVZlXWYWQMztnbz33nvvvffee++997o7nU4n99//P1xmZAFs9s5K2smeIYCqyB8/fnwfPyJOvvzeye/5e377+7snL7ZO6Ff67cs7073pdLp18uMnJ/e2vrxz8mL/hH47Odm/Qx9O70/x3L+z3Pt/AJix1H08AAAA
71B00C4315D653402C5FE90A6AF84A52	1	cxsmiles	JChemExcelNgAAAB+LCAAAAAAABADtvQdgHEmWJSYvbcp7f0r1StfgdKEIgGATJNiQQBDswYjN5pLsHWlHIymrKoHKZVZlXWYWQMztnbz33nvvvffee++997o7nU4n99//P1xmZAFs9s5K2smeIYCqyB8/fnwfPyJOvvx9X3x2snX3ZOuzL+98eXLn953uTvHs2i/ooz18sjXdu3Oy9ewO/e/Z/wMQI5VQNgAAAA==
3B997F79075C277115454B1638D9EDB1	1	cxsmiles	JChemExcelJwAAAB+LCAAAAAAABADtvQdgHEmWJSYvbcp7f0r1StfgdKEIgGATJNiQQBDswYjN5pLsHWlHIymrKoHKZVZlXWYWQMztnbz33nvvvffee++997o7nU4n99//P1xmZAFs9s5K2smeIYCqyB8/fnwfPyJOprvL5d7J1mdf3jm599nJ1gk99+68mO5Nd6f70+l066S8M53u/z9oYEqQJwAAAA==
A3CDC68D45798A5132839B5E87801C3D	1	cxsmiles	JChemExcelJgAAAB+LCAAAAAAABADtvQdgHEmWJSYvbcp7f0r1StfgdKEIgGATJNiQQBDswYjN5pLsHWlHIymrKoHKZVZlXWYWQMztnbz33nvvvffee++997o7nU4n99//P1xmZAFs9s5K2smeIYCqyB8/fnwfPyJOprvVcrp1cme6e/LldG9Kz9Z0787J1mdf3nkxvbfEB/dO/h8twGYAJgAAAA==
20B96D31D3DA72E49C07AE6BEE6A3261	1	cxsmiles	JChemExcelKQAAAB+LCAAAAAAABADtvQdgHEmWJSYvbcp7f0r1StfgdKEIgGATJNiQQBDswYjN5pLsHWlHIymrKoHKZVZlXWYWQMztnbz33nvvvffee++997o7nU4n99//P1xmZAFs9s5K2smeIYCqyB8/fnwfPyKeTXen0+nWdLp7Z7pX4Ze9Oydbn31558XJ9N5yOd0/wbO8t///AC56AvApAAAA
D5E046EEFC47A372B8104B70D0C98C04	1	cxsmiles	JChemExcelJQAAAB+LCAAAAAAABADtvQdgHEmWJSYvbcp7f0r1StfgdKEIgGATJNiQQBDswYjN5pLsHWlHIymrKoHKZVZlXWYWQMztnbz33nvvvffee++997o7nU4n99//P1xmZAFs9s5K2smeIYCqyB8/fnwfPyJOTnZP6Hmxe7L12Zd3XpycTPem1XRruXdnem86nW49uzOd3vt/AEkvr/glAAAA
6F74E68EFB8786DD384D82230F726BA9	1	cxsmiles	JChemExcelKQAAAB+LCAAAAAAABADtvQdgHEmWJSYvbcp7f0r1StfgdKEIgGATJNiQQBDswYjN5pLsHWlHIymrKoHKZVZlXWYWQMztnbz33nvvvffee++997o7nU4n99//P1xmZAFs9s5K2smeIYCqyB8/fnwfPyJOTrZO7tD/Tra+xP+nu9PpdGs63b0z3Zvi2buzvDddTpf3/h9o+cowKQAAAA==
B5B2503B0891FB318CC857DE642BD9C0	1	cxsmiles	JChemExcelOgAAAB+LCAAAAAAABADtvQdgHEmWJSYvbcp7f0r1StfgdKEIgGATJNiQQBDswYjN5pLsHWlHIymrKoHKZVZlXWYWQMztnbz33nvvvffee++997o7nU4n99//P1xmZAFs9s5K2smeIYCqyB8/fnwfPyJOTnY/O9l6dufksxP63+7Ji70TerZOTu599oJ+7PPHW/j1zmdfotX+nc9efHnvzsne/wOArQXZOgAAAA==
3F7802096722DA941DAFC857A7FF2E65	1	cxsmiles	JChemExcelMgAAAB+LCAAAAAAABADtvQdgHEmWJSYvbcp7f0r1StfgdKEIgGATJNiQQBDswYjN5pLsHWlHIymrKoHKZVZlXWYWQMztnbz33nvvvffee++997o7nU4n99//P1xmZAFs9s5K2smeIYCqyB8/fnwfPyK+/Oxk68XuycnWyd5n9O+Lkzv4Qf++2Lvz5cnJ7p2Te5+9eHGy/9nJvRP65rOT/f8HpgMc6zIAAAA=
EE17715A9BA3A9E48BFF2C298CA2A6C9	1	cxsmiles	JChemExcelHgAAAB+LCAAAAAAABADtvQdgHEmWJSYvbcp7f0r1StfgdKEIgGATJNiQQBDswYjN5pLsHWlHIymrKoHKZVZlXWYWQMztnbz33nvvvffee++997o7nU4n99//P1xmZAFs9s5K2smeIYCqyB8/fnwfPyJeT3eXy+nWi5Otz768M92bTree1Hem0+neSXmn2f1/AEEGWgkeAAAA
68DB672E094B0E11D1B898B9215C4DCA	1	cxsmiles	JChemExcelHAAAAB+LCAAAAAAABADtvQdgHEmWJSYvbcp7f0r1StfgdKEIgGATJNiQQBDswYjN5pLsHWlHIymrKoHKZVZlXWYWQMztnbz33nvvvffee++997o7nU4n99//P1xmZAFs9s5K2smeIYCqyB8/fnwfPyJOvpzuTunZm26d3FlOt158drL14s4L+nV37/8B9sz5jRwAAAA=
770B42443AF48CD1CAE65767947FF97A	1	cxsmiles	JChemExcelKgAAAB+LCAAAAAAABADtvQdgHEmWJSYvbcp7f0r1StfgdKEIgGATJNiQQBDswYjN5pLsHWlHIymrKoHKZVZlXWYWQMztnbz33nvvvffee++997o7nU4n99//P1xmZAFs9s5K2smeIYCqyB8/fnwfPyKe1NPd6XS69+Jk67Mv75zc23pxcjLdn9773vLb35/en+LZv39nujfd/X8Atp+O/SoAAAA=
10D342A56741B47608ED98FE7B3D74DE	1	cxsmiles	JChemExcelLwAAAB+LCAAAAAAABADtvQdgHEmWJSYvbcp7f0r1StfgdKEIgGATJNiQQBDswYjN5pLsHWlHIymrKoHKZVZlXWYWQMztnbz33nvvvffee++997o7nU4n99//P1xmZAFs9s5K2smeIYCqyB8/fnwfPyJOprvT6dZJeWe6NZ3ufnlysvXZl3denOyd4Nm78xp/8kf38MG9/wcg9KZ+LwAAAA==
277A7860B4DADB52E63084135AC0BA98	1	cxsmiles	JChemExcelNAAAAB+LCAAAAAAABADtvQdgHEmWJSYvbcp7f0r1StfgdKEIgGATJNiQQBDswYjN5pLsHWlHIymrKoHKZVZlXWYWQMztnbz33nvvvffee++997o7nU4n99//P1xmZAFs9s5K2smeIYCqyB8/fnwfPyJOTrZO7rzYOpnuTvHs3nm99dmXd/D/6R79vTWd7t05wZ8vpvfoz5M71fLe/wMhcTVFNAAAAA==
8522E176C282B7121FD0EA86699742A1	1	cxsmiles	JChemExcelMgAAAB+LCAAAAAAABADtvQdgHEmWJSYvbcp7f0r1StfgdKEIgGATJNiQQBDswYjN5pLsHWlHIymrKoHKZVZlXWYWQMztnbz33nvvvffee++997o7nU4n99//P1xmZAFs9s5K2smeIYCqyB8/fnwfPyJOvpzuTqdbX57coX+nu3dOtj778s6Lk5O9k+k9+uSk5M/vfbl3Z7o/nS6n0/3/B/ZpRSAyAAAA
0B583611FE735137197093D82E152DAC	1	cxsmiles	JChemExcelMgAAAB+LCAAAAAAABADtvQdgHEmWJSYvbcp7f0r1StfgdKEIgGATJNiQQBDswYjN5pLsHWlHIymrKoHKZVZlXWYWQMztnbz33nvvvffee++997o7nU4n99//P1xmZAFs9s5K2smeIYCqyB8/fnwfPyJOprvT6dbJneXWcvfOdG9Kf7w42frsyzsn905OXmydTPenS3zf7N85Obl3Zzrd+38A+EaxsTIAAAA=
C712467FA74AABB497767AD7738BE5B3	1	cxsmiles	JChemExcelKAAAAB+LCAAAAAAABADtvQdgHEmWJSYvbcp7f0r1StfgdKEIgGATJNiQQBDswYjN5pLsHWlHIymrKoHKZVZlXWYWQMztnbz33nvvvffee++997o7nU4n99//P1xmZAFs9s5K2smeIYCqyB8/fnwfPyJOprvVcro13b1zsvXZl3deTPemy+XWyfTedDrdOinvTKf38O/e/wMiB1XPKAAAAA==
90D9B350A3046E2AC71C7A54B42264AD	1	cxsmiles	JChemExcelLAAAAB+LCAAAAAAABADtvQdgHEmWJSYvbcp7f0r1StfgdKEIgGATJNiQQBDswYjN5pLsHWlHIymrKoHKZVZlXWYWQMztnbz33nvvvffee++997o7nU4n99//P1xmZAFs9s5K2smeIYCqyB8/fnwfPyK+/Oxk62T35OTF1snJ7p3p3pKevem9KZ57d17sn5xM7/Mf90/2/x8cmB2kLAAAAA==
52A4E186AF7AA4896B8E2E003AC8A614	1	cxsmiles	JChemExcelKQAAAB+LCAAAAAAABADtvQdgHEmWJSYvbcp7f0r1StfgdKEIgGATJNiQQBDswYjN5pLsHWlHIymrKoHKZVZlXWYWQMztnbz33nvvvffee++997o7nU4n99//P1xmZAFs9s5K2smeIYCqyB8/fnwfPyJOvpzuTqfTrZOTF3snJyf0c+/Oi5PpvSk+nN6782Lr5M7Jnel09/8BSxtQFikAAAA=
FAF34D72D2D2244999F2F9CB9BB50407	1	cxsmiles	JChemExcelJgAAAB+LCAAAAAAABADtvQdgHEmWJSYvbcp7f0r1StfgdKEIgGATJNiQQBDswYjN5pLsHWlHIymrKoHKZVZlXWYWQMztnbz33nvvvffee++997o7nU4n99//P1xmZAFs9s5K2smeIYCqyB8/fnwfPyJOprvT6XRvuvXiZOuzL++c7N178eKzk63X9+5M96d49u9Md0/+H0G6OwAmAAAA
D08AFA2D37A4BA9418A03F6B0C22ED86	1	cxsmiles	JChemExcelNAAAAB+LCAAAAAAABADtvQdgHEmWJSYvbcp7f0r1StfgdKEIgGATJNiQQBDswYjN5pLsHWlHIymrKoHKZVZlXWYWQMztnbz33nvvvffee++997o7nU4n99//P1xmZAFs9s5K2smeIYCqyB8/fnwfPyKenWw9u0P/m+5Op1v43+4d/eQZ/fLZl3deTPem0+V0a7l3Z3pvil/v/T/SeOHLNAAAAA==
8B740111CEADC012F58F77C69E8402BE	1	cxsmiles	JChemExcelIgAAAB+LCAAAAAAABADtvQdgHEmWJSYvbcp7f0r1StfgdKEIgGATJNiQQBDswYjN5pLsHWlHIymrKoHKZVZlXWYWQMztnbz33nvvvffee++997o7nU4n99//P1xmZAFs9s5K2smeIYCqyB8/fnwfPyJOprvVcro13b1zsvXZl3deTPemU/pzundnem+K597/A6Sjdr4iAAAA
63491FCA04E3A4A1974ECEC6347EA0BA	1	cxsmiles	JChemExcelNQAAAB+LCAAAAAAABADtvQdgHEmWJSYvbcp7f0r1StfgdKEIgGATJNiQQBDswYjN5pLsHWlHIymrKoHKZVZlXWYWQMztnbz33nvvvffee++997o7nU4n99//P1xmZAFs9s5K2smeIYCqyB8/fnwfPyJOTrZe7J6cvNg6Odm983rrsy/v4P/Tvel0ujWd7t052Tq5Q/+j//D5i3sn9Nz7fwBRWHunNQAAAA==
B147BB125974EFF92AAEDD65488E0011	1	cxsmiles	JChemExcelLAAAAB+LCAAAAAAABADtvQdgHEmWJSYvbcp7f0r1StfgdKEIgGATJNiQQBDswYjN5pLsHWlHIymrKoHKZVZlXWYWQMztnbz33nvvvffee++997o7nU4n99//P1xmZAFs9s5K2smeIYCqyB8/fnwfPyJOvpzuTqfTrel09850b7qcTu/hz+V0796dk63Pvrzz4uTkZLk/pW/2/x9gsR9lLAAAAA==
CAEBC9B46B626F17CB2666324DD5D608	1	cxsmiles	JChemExcelJQAAAB+LCAAAAAAABADtvQdgHEmWJSYvbcp7f0r1StfgdKEIgGATJNiQQBDswYjN5pLsHWlHIymrKoHKZVZlXWYWQMztnbz33nvvvffee++997o7nU4n99//P1xmZAFs9s5K2smeIYCqyB8/fnwfPyJOTrZO7py8mO5Op1vL6d5063vLb39/Od3du7ONz+jZvXPy/wBS3wRhJQAAAA==
7EF9A1714168E2AAE92798A6B075E36A	1	cxsmiles	JChemExcelIgAAAB+LCAAAAAAABADtvQdgHEmWJSYvbcp7f0r1StfgdKEIgGATJNiQQBDswYjN5pLsHWlHIymrKoHKZVZlXWYWQMztnbz33nvvvffee++997o7nU4n99//P1xmZAFs9s5K2smeIYCqyB8/fnwfPyJOprvL6db3lt/+/nT35M50b0rP1ouT6T38Mr13Z7r3/wClEhBUIgAAAA==
4C7A0E5960135E513B13DA1BA4EA580B	1	cxsmiles	JChemExcelKQAAAB+LCAAAAAAABADtvQdgHEmWJSYvbcp7f0r1StfgdKEIgGATJNiQQBDswYjN5pLsHWlHIymrKoHKZVZlXWYWQMztnbz33nvvvffee++997o7nU4n99//P1xmZAFs9s5K2smeIYCqyB8/fnwfPyJeTHeX0+nWdLo73VtO79GvJ+WdKf32veW3v793Z7o/XeK36f7/A5SLig4pAAAA
2FB3111E3EF94151E8D9C577A3C71996	1	cxsmiles	JChemExcelKAAAAB+LCAAAAAAABADtvQdgHEmWJSYvbcp7f0r1StfgdKEIgGATJNiQQBDswYjN5pLsHWlHIymrKoHKZVZlXWYWQMztnbz33nvvvffee++997o7nU4n99//P1xmZAFs9s5K2smeIYCqyB8/fnwfPyK+/Oxk68XJ7snJ7p3p3nQ63VpO9+68uHdycrJ1Mt2f4tm/c3Jy7/8B5MPm/CgAAAA=
5063EABDEF8DBC37AF10FCAA490E5919	1	cxsmiles	JChemExcelLwAAAB+LCAAAAAAABADtvQdgHEmWJSYvbcp7f0r1StfgdKEIgGATJNiQQBDswYjN5pLsHWlHIymrKoHKZVZlXWYWQMztnbz33nvvvffee++997o7nU4n99//P1xmZAFs9s5K2smeIYCqyB8/fnwfPyJOTrZO7py82D3BLye7d17Qn9O96XTrxcnWZ1/emd6b0oPP7t2ZTpd7/w9M/bH/LwAAAA==
8981563AF21E40F59476E42E3020FBEB	1	cxsmiles	JChemExcelLgAAAB+LCAAAAAAABADtvQdgHEmWJSYvbcp7f0r1StfgdKEIgGATJNiQQBDswYjN5pLsHWlHIymrKoHKZVZlXWYWQMztnbz33nvvvffee++997o7nU4n99//P1xmZAFs9s5K2smeIYCqyB8/fnwfPyJOTpa7y+l0b7r14uTeycmXJyf37ky3Tl6cbH325Z3p/nS6XO6f4JM7y+nu3v8DAX2jui4AAAA=
7A770B520D05E32DDD506F8456A3CCB2	1	cxsmiles	JChemExcelIwAAAB+LCAAAAAAABADtvQdgHEmWJSYvbcp7f0r1StfgdKEIgGATJNiQQBDswYjN5pLsHWlHIymrKoHKZVZlXWYWQMztnbz33nvvvffee++997o7nU4n99//P1xmZAFs9s5K2smeIYCqyB8/fnwfPyK+PJnuTqfTrel09850b7qkX19M703x0Ul5Z3rvznTv/wFM1aUwIwAAAA==
6F8C09B69F25D24DD50E5BF2E8F3FFB6	1	cxsmiles	JChemExcelLgAAAB+LCAAAAAAABADtvQdgHEmWJSYvbcp7f0r1StfgdKEIgGATJNiQQBDswYjN5pLsHWlHIymrKoHKZVZlXWYWQMztnbz33nvvvffee++997o7nU4n99//P1xmZAFs9s5K2smeIYCqyB8/fnwfPyKenWw9u0P/m+5O6dma7t6Z7i2n96ZbL06m+9Ppcjrdv0P/TO99b/nt7+/9P+qNE78uAAAA
7C898B846F7B65866E7F7CAE8F933651	1	cxsmiles	JChemExcelNwAAAB+LCAAAAAAABADtvQdgHEmWJSYvbcp7f0r1StfgdKEIgGATJNiQQBDswYjN5pLsHWlHIymrKoHKZVZlXWYWQMztnbz33nvvvffee++997o7nU4n99//P1xmZAFs9s5K2smeIYCqyB8/fnwfPyJOyunudDrdmk5377ze+uzLO/j/i5Otk+ne9HvLb39/em+KZ+/enRP+Zv8Ez/7/A4+SIPE3AAAA
F8B410487D4C9BC952A225C8D8B8E147	1	cxsmiles	JChemExcelJwAAAB+LCAAAAAAABADtvQdgHEmWJSYvbcp7f0r1StfgdKEIgGATJNiQQBDswYjN5pLsHWlHIymrKoHKZVZlXWYWQMztnbz33nvvvffee++997o7nU4n99//P1xmZAFs9s5K2smeIYCqyB8/fnwfPyJOTk5enGx99uWdF7v0697WycnunRP+YHpvOt06uTOdTu99uff/APMKc4AnAAAA
F08A675678EDDFAB262F34C9F5D047AF	1	cxsmiles	JChemExcelKAAAAB+LCAAAAAAABADtvQdgHEmWJSYvbcp7f0r1StfgdKEIgGATJNiQQBDswYjN5pLsHWlHIymrKoHKZVZlXWYWQMztnbz33nvvvffee++997o7nU4n99//P1xmZAFs9s5K2smeIYCqyB8/fnwfPyJOTqa70+l0azrdvXOy9eJkurecbr24Q/8s9+682Dq5Q//h3/8Ht/PZICgAAAA=
766A3E4AD788B0830C87EEDB47F95F15	1	cxsmiles	JChemExcelKgAAAB+LCAAAAAAABADtvQdgHEmWJSYvbcp7f0r1StfgdKEIgGATJNiQQBDswYjN5pLsHWlHIymrKoHKZVZlXWYWQMztnbz33nvvvffee++997o7nU4n99//P1xmZAFs9s5K2smeIYCqyB8/fnwfPyJOXpxsffblnZMX093ldGs53Wum063pvSmee3emu3t3pvv4fbn//wD/+HwIKgAAAA==
4122A5D04E16627108529B4F74A679CC	1	cxsmiles	JChemExcelJwAAAB+LCAAAAAAABADtvQdgHEmWJSYvbcp7f0r1StfgdKEIgGATJNiQQBDswYjN5pLsHWlHIymrKoHKZVZlXWYWQMztnbz33nvvvffee++997o7nU4n99//P1xmZAFs9s5K2smeIYCqyB8/fnwfPyJOvpzuTunZmu7eme5Np/emWy+m+/TBcrp/Z0k/731v+e3v7/0/7ii9WCcAAAA=
836C6C9F15D5F2E6689A076D6D3C764D	1	cxsmiles	JChemExcelKwAAAB+LCAAAAAAABADtvQdgHEmWJSYvbcp7f0r1StfgdKEIgGATJNiQQBDswYjN5pLsHWlHIymrKoHKZVZlXWYWQMztnbz33nvvvffee++997o7nU4n99//P1xmZAFs9s5K2smeIYCqyB8/fnwfPyJOXuyenLzYOjnZvTPdW06n03vL6db3lt/+/nTv3p3pPn2w9ewO/3///wGVbhxTKwAAAA==
F1E125544CD02E6DAAED5CFEE7029FC2	1	cxsmiles	JChemExcelMgAAAB+LCAAAAAAABADtvQdgHEmWJSYvbcp7f0r1StfgdKEIgGATJNiQQBDswYjN5pLsHWlHIymrKoHKZVZlXWYWQMztnbz33nvvvffee++997o7nU4n99//P1xmZAFs9s5K2smeIYCqyB8/fnwfPyJOvnfye/6e3/7+1ovdE3roj29/f3e6N51Ot748md6b4pdnd6b37kyne3dOtj778s6L/wcQOqu2MgAAAA==
164F37A522971198E4770FCFF99E2F1B	1	cxsmiles	JChemExcelIQAAAB+LCAAAAAAABADtvQdgHEmWJSYvbcp7f0r1StfgdKEIgGATJNiQQBDswYjN5pLsHWlHIymrKoHKZVZlXWYWQMztnbz33nvvvffee++997o7nU4n99//P1xmZAFs9s5K2smeIYCqyB8/fnwfPyJeTHeX0+nWk/rOdLo73VtO79FfJ+WdKf32veW3v7/3/wADngwaIQAAAA==
979341DAF8C85C4687DC22884774949C	1	cxsmiles	JChemExcelMAAAAB+LCAAAAAAABADtvQdgHEmWJSYvbcp7f0r1StfgdKEIgGATJNiQQBDswYjN5pLsHWlHIymrKoHKZVZlXWYWQMztnbz33nvvvffee++997o7nU4n99//P1xmZAFs9s5K2smeIYCqyB8/fnwfPyJOTrY++/LOi+nudDrdesF/TPfo1+8tv/395d6d6T36/aS8Q9/eo2+mu/8PoY14pDAAAAA=
1684EA92234BAF0D9A87517D42B408C5	1	cxsmiles	JChemExcelPAAAAB+LCAAAAAAABADtvQdgHEmWJSYvbcp7f0r1StfgdKEIgGATJNiQQBDswYjN5pLsHWlHIymrKoHKZVZlXWYWQMztnbz33nvvvffee++997o7nU4n99//P1xmZAFs9s5K2smeIYCqyB8/fnwfPyJOTrZO7kx3l9Pp1nRvOqWfe3emW8vdO987+T1/z29//97JifyydfLiZOuzL+9M96dotX/n5OTe/wPXQSCLPAAAAA==
0E2F056EDA479FAE8841DE5B7E2BCCCE	1	cxsmiles	JChemExcelPwAAAB+LCAAAAAAABADtvQdgHEmWJSYvbcp7f0r1StfgdKEIgGATJNiQQBDswYjN5pLsHWlHIymrKoHKZVZlXWYWQMztnbz33nvvvffee++997o7nU4n99//P1xmZAFs9s5K2smeIYCqyB8/fnwfPyJOXuyenLzYOjnZvfN667Mv7+D/073pdLo1ne7dmd6j3/anWy+m9+mXT5fL7y2//f3pp9P7d6bTJX1x7/8Bt3W9Cz8AAAA=
D902CDFEAE70BDE4D97FFF7C2125FC8D	1	cxsmiles	JChemExcelMQAAAB+LCAAAAAAABADtvQdgHEmWJSYvbcp7f0r1StfgdKEIgGATJNiQQBDswYjN5pLsHWlHIymrKoHKZVZlXWYWQMztnbz33nvvvffee++997o7nU4n99//P1xmZAFs9s5K2smeIYCqyB8/fnwfPyJOTrZO7tD/prvT6XTrxfdOfs/f89vf3zuhh36l316cbH325Z3pvYq+vndnOt39fwBR7oFsMQAAAA==
210656EF77420D0AE5958C74BCFB60D9	1	cxsmiles	JChemExcelIgAAAB+LCAAAAAAABADtvQdgHEmWJSYvbcp7f0r1StfgdKEIgGATJNiQQBDswYjN5pLsHWlHIymrKoHKZVZlXWYWQMztnbz33nvvvffee++997o7nU4n99//P1xmZAFs9s5K2smeIYCqyB8/fnwfPyJOvpzuTqfTrel0986LrZOT6d4Uf57cWe7dOdn67Ms7J/8PDCdOASIAAAA=
F754BF4267D8D7CF453FB0C4DC159C46	1	cxsmiles	JChemExcelLgAAAB+LCAAAAAAABADtvQdgHEmWJSYvbcp7f0r1StfgdKEIgGATJNiQQBDswYjN5pLsHWlHIymrKoHKZVZlXWYWQMztnbz33nvvvffee++997o7nU4n99//P1xmZAFs9s5K2smeIYCqyB8/fnwfPyJOTrY++/LOi62TE/o/fp3uTqfTrWd3ptPdO9O9KZ69O9N7/Mu9/wcrYasbLgAAAA==
2E3AD27134E128B62F76F892A68215B3	1	cxsmiles	JChemExcelXAAAAB+LCAAAAAAABADtvQdgHEmWJSYvbcp7f0r1StfgdKEIgGATJNiQQBDswYjN5pLsHWlHIymrKoHKZVZlXWYWQMztnbz33nvvvffee++997o7nU4n99//P1xmZAFs9s5K2smeIYCqyB8/fnwfPyJOvnfye/6e3/7+Lv349vf3+N+tL+/wz3vy14utkzv039ZnJ1v0z5d3XtzhH3jv+/eoLb7Z44+m+1P6e0rP7v6dL+98+f8AiW4CSlwAAAA=
1BAB08DC3C641F2F17FF20D812DFECD0	1	cxsmiles	JChemExceleQAAAB+LCAAAAAAABADtvQdgHEmWJSYvbcp7f0r1StfgdKEIgGATJNiQQBDswYjN5pLsHWlHIymrKoHKZVZlXWYWQMztnbz33nvvvffee++997o7nU4n99//P1xmZAFs9s5K2smeIYCqyB8/fnwfPyJenJycbH1552Trsy/vvPjeye/5e377+7sn9PPb3996cUf+3vryZO9L+ejEfXZHPtGfe+7vk90vT+6Z9l9227+Qn/e+/H8AEddFXnkAAAA=
F2531CDF7CD0D483CB0F8AC2E3D48706	1	cxsmiles	JChemExcelLwAAAB+LCAAAAAAABADtvQdgHEmWJSYvbcp7f0r1StfgdKEIgGATJNiQQBDswYjN5pLsHWlHIymrKoHKZVZlXWYWQMztnbz33nvvvffee++997o7nU4n99//P1xmZAFs9s5K2smeIYCqyB8/fnwfPyJOTrY++/LOi5Pvnfyev+e3v7978mKLP/hy9850bzqdbr24d3Ly5cnJvTvTrWd3pnv/D0KpPK0vAAAA
07A1595B8B5B880D538F4872E475AB6C	1	cxsmiles	JChemExcelpgAAAB+LCAAAAAAABADtvQdgHEmWJSYvbcp7f0r1StfgdKEIgGATJNiQQBDswYjN5pLsHWlHIymrKoHKZVZlXWYWQMztnbz33nvvvffee++997o7nU4n99//P1xmZAFs9s5K2smeIYCqyB8/fnwfPyJOvvzeye/57e/v/r4nn538vvj99/z+3tbJnS9P7n12snWy99mXd0726bcv7/y+J1ufndx98eL+yckLanBycp8/eoF/zLeAweCogfz8Ej/tB/1P8AEDMN/vnhAsAbePf+4RLne+/H8AHgvmA6YAAAA=
C075A537866411EF602B61CD499D7C5E	1	cxsmiles	JChemExcelSQAAAB+LCAAAAAAABADtvQdgHEmWJSYvbcp7f0r1StfgdKEIgGATJNiQQBDswYjN5pLsHWlHIymrKoHKZVZlXWYWQMztnbz33nvvvffee++997o7nU4n99//P1xmZAFs9s5K2smeIYCqyB8/fnwfPyJOXpzsnmx9eUf+f/LlnS9Pdr882aM/T+65z1+cbH324s4L+eue+etLeuHOyR4+++zL/weeJYxSSQAAAA==
207210A590238269A207F906C5412BCD	1	cxsmiles	JChemExcelzAAAAB+LCAAAAAAABADtvQdgHEmWJSYvbcp7f0r1StfgdKEIgGATJNiQQBDswYjN5pLsHWlHIymrKoHKZVZlXWYWQMztnbz33nvvvffee++997o7nU4n99//P1xmZAFs9s5K2smeIYCqyB8/fnwfPyJOvnfye/6e3/7+7pcnW599eQd/ffv7W/4v2oB+7X9Hv3x/z/9Efsq/9kX5ee9L/fiO+Vxbv9AP7n155/c9+exk8P/x13dP7ny5d4eR//L/ARAfJ1HMAAAA
89EFFD2067FA6A166F173DED813E735F	1	cxsmiles	JChemExcelOgAAAB+LCAAAAAAABADtvQdgHEmWJSYvbcp7f0r1StfgdKEIgGATJNiQQBDswYjN5pLsHWlHIymrKoHKZVZlXWYWQMztnbz33nvvvffee++997o7nU4n99//P1xmZAFs9s5K2smeIYCqyB8/fnwfPyKeTXen0+nWdLp7Z3u6+73lt7/Pf2zj4yU+Pdk9OXmxdXJCv2199uWdL0/4hel09/8BlkUFIToAAAA=
E823A2C213C5CA0AA7CC533AA59B5F72	1	cxsmiles	JChemExcelIwAAAB+LCAAAAAAABADtvQdgHEmWJSYvbcp7f0r1StfgdKEIgGATJNiQQBDswYjN5pLsHWlHIymrKoHKZVZlXWYWQMztnbz33nvvvffee++997o7nU4n99//P1xmZAFs9s5K2smeIYCqyB8/fnwfPyJOTrZO7tD/lrvL6db2dG+KZ+8O/bL14s5yupzu7v0/fFWLtCMAAAA=
C5FC8E4725BACCE10409225F0BEEED18	1	cxsmiles	JChemExcelLgAAAB+LCAAAAAAABADtvQdgHEmWJSYvbcp7f0r1StfgdKEIgGATJNiQQBDswYjN5pLsHWlHIymrKoHKZVZlXWYWQMztnbz33nvvvffee++997o7nU4n99//P1xmZAFs9s5K2smeIYCqyB8/fnwfPyJOXuyenJxsnZzs3pnuTqdb063vLb/9/d072/hruvXsznSqfyyn093/B8KK8oouAAAA
B2429BDEAFFEBAEE65902DE3C83FEDCB	1	cxsmiles	JChemExcelKgAAAB+LCAAAAAAABADtvQdgHEmWJSYvbcp7f0r1StfgdKEIgGATJNiQQBDswYjN5pLsHWlHIymrKoHKZVZlXWYWQMztnbz33nvvvffee++997o7nU4n99//P1xmZAFs9s5K2smeIYCqyB8/fnwfPyJOTrZO7tD/lrvL6dbJdG86nW49u0O/lneme/S/6daLO8vpcrq79/8AaaRLcioAAAA=
A9C2D605D874EB477905C1421AF2E8C3	1	cxsmiles	JChemExcelJwAAAB+LCAAAAAAABADtvQdgHEmWJSYvbcp7f0r1StfgdKEIgGATJNiQQBDswYjN5pLsHWlHIymrKoHKZVZlXWYWQMztnbz33nvvvffee++997o7nU4n99//P1xmZAFs9s5K2smeIYCqyB8/fnwfPyJOprvT6daLk63Pvrwz3ZvS719O7+HHSXlnOr335Z1q786y2v1/AO/xpJ8nAAAA
701A2642D4E7AFADEFF237AA983787AB	1	cxsmiles	JChemExcelHwAAAB+LCAAAAAAABADtvQdgHEmWJSYvbcp7f0r1StfgdKEIgGATJNiQQBDswYjN5pLsHWlHIymrKoHKZVZlXWYWQMztnbz33nvvvffee++997o7nU4n99//P1xmZAFs9s5K2smeIYCqyB8/fnwfPyJOTrY++/LOi92Tk+nedHpvOd06uTPlf+5Np7t7/w/luO4BHwAAAA==
69D51DFF5287A3FB69307C9F10203B96	1	cxsmiles	JChemExcelKAAAAB+LCAAAAAAABADtvQdgHEmWJSYvbcp7f0r1StfgdKEIgGATJNiQQBDswYjN5pLsHWlHIymrKoHKZVZlXWYWQMztnbz33nvvvffee++997o7nU4n99//P1xmZAFs9s5K2smeIYCqyB8/fnwfPyJOTr482frsyzsv+N/p7nTaTHf1j73l9N4Uz71m7/8BBVO8mygAAAA=
C547D2A1BA8B6C317CFAC8D039EE3EAD	1	cxsmiles	JChemExcelLQAAAB+LCAAAAAAABADtvQdgHEmWJSYvbcp7f0r1StfgdKEIgGATJNiQQBDswYjN5pLsHWlHIymrKoHKZVZlXWYWQMztnbz33nvvvffee++997o7nU4n99//P1xmZAFs9s5K2smeIYCqyB8/fnwfPyJOTk62Tu68ONn67Ms7093pdLolv5/sbdFXJ3t3pvemeO7dmU53/x9IKkJNLQAAAA==
91B08C69F596700271680A2A6FC44F43	1	cxsmiles	JChemExcelHgAAAB+LCAAAAAAABADtvQdgHEmWJSYvbcp7f0r1StfgdKEIgGATJNiQQBDswYjN5pLsHWlHIymrKoHKZVZlXWYWQMztnbz33nvvvffee++997o7nU4n99//P1xmZAFs9s5K2smeIYCqyB8/fnwfPyKe1NPd6dZyurecTqfL3b0703v0y/6XJ19O96f3/h/5mYp2HgAAAA==
AF19D5D49C83EF503F6A7187E782091B	1	cxsmiles	JChemExcelHwAAAB+LCAAAAAAABADtvQdgHEmWJSYvbcp7f0r1StfgdKEIgGATJNiQQBDswYjN5pLsHWlHIymrKoHKZVZlXWYWQMztnbz33nvvvffee++997o7nU4n99//P1xmZAFs9s5K2smeIYCqyB8/fnwfPyJOvpzuTunZ+vLkZOuzL+9M9/DHk/rOdLp3Z7r7/wDr69WaHwAAAA==
B32210978782B9F7AFC458B76A300814	1	cxsmiles	JChemExcelIgAAAB+LCAAAAAAABADtvQdgHEmWJSYvbcp7f0r1StfgdKEIgGATJNiQQBDswYjN5pLsHWlHIymrKoHKZVZlXWYWQMztnbz33nvvvffee++997o7nU4n99//P1xmZAFs9s5K2smeIYCqyB8/fnwfPyKeTXeneHane9V068XJyfQe/33vznRruXfn5Mdf/D+6hSr5IgAAAA==
A83FAD97D048A7C8B0E8ADC5489E10E7	1	cxsmiles	JChemExcelKAAAAB+LCAAAAAAABADtvQdgHEmWJSYvbcp7f0r1StfgdKEIgGATJNiQQBDswYjN5pLsHWlHIymrKoHKZVZlXWYWQMztnbz33nvvvffee++997o7nU4n99//P1xmZAFs9s5K2smeIYCqyB8/fnwfPyJOprtTerZOlnv48eJk67Mv70zv0e/7X558Od2f3ruz3Lsz3f1/AHL5n18oAAAA
8D6D11C763DD1FBBBD60D58FD1B1AFA6	1	cxsmiles	JChemExcelKAAAAB+LCAAAAAAABADtvQdgHEmWJSYvbcp7f0r1StfgdKEIgGATJNiQQBDswYjN5pLsHWlHIymrKoHKZVZlXWYWQMztnbz33nvvvffee++997o7nU4n99//P1xmZAFs9s5K2smeIYCqyB8/fnwfPyK+PNn97GTrZOuzL++8mO5Np9PldO+O/Hnv5GS6T59Md6f39v8f91V9oSgAAAA=
B5F1295A386DA12FD833063D95EA0957	1	cxsmiles	JChemExcelHQAAAB+LCAAAAAAABADtvQdgHEmWJSYvbcp7f0r1StfgdKEIgGATJNiQQBDswYjN5pLsHWlHIymrKoHKZVZlXWYWQMztnbz33nvvvffee++997o7nU4n99//P1xmZAFs9s5K2smeIYCqyB8/fnwfPyJOTk6Wu9OtkxfTvSmevS/vLKf3+Nfde/8Pp4dYSh0AAAA=
FE9D47FE66302A20B58D719050A9C572	1	cxsmiles	JChemExcelIwAAAB+LCAAAAAAABADtvQdgHEmWJSYvbcp7f0r1StfgdKEIgGATJNiQQBDswYjN5pLsHWlHIymrKoHKZVZlXWYWQMztnbz33nvvvffee++997o7nU4n99//P1xmZAFs9s5K2smeIYCqyB8/fnwfPyJOTqa7y+neFM/ecvfkZOvLOydfTu9Np1snd+izeyfl/wN/timIIwAAAA==
3CE3CE06A08123C7A0FEAA1D79F9417F	1	cxsmiles	JChemExcelMgAAAB+LCAAAAAAABADtvQdgHEmWJSYvbcp7f0r1StfgdKEIgGATJNiQQBDswYjN5pLsHWlHIymrKoHKZVZlXWYWQMztnbz33nvvvffee++997o7nU4n99//P1xmZAFs9s5K2smeIYCqyB8/fnwfPyK+/Oxk62T35OTF1snJ7p3p3nI53Wr27izvTem5d+fF/skJNZjex5/T+3dOTvb/Hx8qHasyAAAA
90B0ACBC5C7E9D9E96A0689092118D73	1	cxsmiles	JChemExcelKwAAAB+LCAAAAAAABADtvQdgHEmWJSYvbcp7f0r1StfgdKEIgGATJNiQQBDswYjN5pLsHWlHIymrKoHKZVZlXWYWQMztnbz33nvvvffee++997o7nU4n99//P1xmZAFs9s5K2smeIYCqyB8/fnwfPyJOprvT6XSvmm4tp3vT3TvTe9Pp1ouTrc++vHMy3Z/i2b9D/9w7Kf8fcUI7sisAAAA=
626A7F1FA45EB8C33542A6A85BEBB0C2	1	cxsmiles	JChemExcelKgAAAB+LCAAAAAAABADtvQdgHEmWJSYvbcp7f0r1StfgdKEIgGATJNiQQBDswYjN5pLsHWlHIymrKoHKZVZlXWYWQMztnbz33nvvvffee++997o7nU4n99//P1xmZAFs9s5K2smeIYCqyB8/fnwfPyK+/Oxk68XuycmLrZPp3nQ6vfflyZfTe9O9Oycnu3em+9X0/hTP/en+/wOulqAwKgAAAA==
09B25BD16A46248E4541D4E80E1C836A	1	cxsmiles	JChemExcelHwAAAB+LCAAAAAAABADtvQdgHEmWJSYvbcp7f0r1StfgdKEIgGATJNiQQBDswYjN5pLsHWlHIymrKoHKZVZlXWYWQMztnbz33nvvvffee++997o7nU4n99//P1xmZAFs9s5K2smeIYCqyB8/fnwfPyJOprvL5XTrxcl0b0rP1kl5Z7p3Z3oPf0x37/0/5LEy0x8AAAA=
0748339B792E25A06B14FC5D56B2E0DA	1	cxsmiles	JChemExcelHgAAAB+LCAAAAAAABADtvQdgHEmWJSYvbcp7f0r1StfgdKEIgGATJNiQQBDswYjN5pLsHWlHIymrKoHKZVZlXWYWQMztnbz33nvvvffee++997o7nU4n99//P1xmZAFs9s5K2smeIYCqyB8/fnwfPyJO6Hm99dmXd/D/F9Pd6XS6N10ut07u0M/d/weu50qcHgAAAA==
29C1C31A85FC5CC7ECFEFA600F861573	1	cxsmiles	JChemExcelJwAAAB+LCAAAAAAABADtvQdgHEmWJSYvbcp7f0r1StfgdKEIgGATJNiQQBDswYjN5pLsHWlHIymrKoHKZVZlXWYWQMztnbz33nvvvffee++997o7nU4n99//P1xmZAFs9s5K2smeIYCqyB8/fnwfPyJOvpzuTqfTrZPl3nQ5vTfdWtLv5Z3ldO/enel+RV/t35lOd/8fUP9erycAAAA=
2EF5FEDCAA1001EB5AB2451229A83748	1	cxsmiles	JChemExcelQgAAAB+LCAAAAAAABADtvQdgHEmWJSYvbcp7f0r1StfgdKEIgGATJNiQQBDswYjN5pLsHWlHIymrKoHKZVZlXWYWQMztnbz33nvvvffee++997o7nU4n99//P1xmZAFs9s5K2smeIYCqyB8/fnwfPyJOTqa70+l0azrdvfO9k9/z9/z29/dO5OfW8t6SvjjZ+uzLOy9Opvto9eXJnel0/8703ou9Oydbz+7Q/579P19ojOBCAAAA
59C5B22C31135F4349C599A7BE6CD092	1	cxsmiles	JChemExcelJwAAAB+LCAAAAAAABADtvQdgHEmWJSYvbcp7f0r1StfgdKEIgGATJNiQQBDswYjN5pLsHWlHIymrKoHKZVZlXWYWQMztnbz33nvvvffee++997o7nU4n99//P1xmZAFs9s5K2smeIYCqyB8/fnwfPyJOvpzuTqfTveV06+TOdLr15cnJ1mdf3nkxvTfFc+9L+nRvuvv/ANEA9UYnAAAA
726159A5D44BC3AB0CF6E6CDA17CE744	1	cxsmiles	JChemExcelKgAAAB+LCAAAAAAABADtvQdgHEmWJSYvbcp7f0r1StfgdKEIgGATJNiQQBDswYjN5pLsHWlHIymrKoHKZVZlXWYWQMztnbz33nvvvffee++997o7nU4n99//P1xmZAFs9s5K2smeIYCqyB8/fnwfPyJOTrZO7mydbH325Z0X093pdLr17M50untnuUe/Tpd7d6b3pnjuPft/AAW0W60qAAAA
811F19F2A9E3B3945D8F84656E8E866F	1	cxsmiles	JChemExcelRwAAAB+LCAAAAAAABADtvQdgHEmWJSYvbcp7f0r1StfgdKEIgGATJNiQQBDswYjN5pLsHWlHIymrKoHKZVZlXWYWQMztnbz33nvvvffee++997o7nU4n99//P1xmZAFs9s5K2smeIYCqyB8/fnwfPyJeTHeX0+V0j3/sfe/k9/w9v/39e1/Sz29/f+vky9dbn315B/9/cYJ/p/tTPPtf3pGGW/wLXvh/ABW93PNHAAAA
BDAD0DB833B6E33789B8FA5E5D3D0092	1	cxsmiles	JChemExcelJgAAAB+LCAAAAAAABADtvQdgHEmWJSYvbcp7f0r1StfgdKEIgGATJNiQQBDswYjN5pLsHWlHIymrKoHKZVZlXWYWQMztnbz33nvvvffee++997o7nU4n99//P1xmZAFs9s5K2smeIYCqyB8/fnwfPyJOprvT6daXJydbn31558XJdG+KZ+/O9B59/KS+Q3/cW+7+P4SbOgwmAAAA
AAEE8D6A21A67C1008D0F6D58D10F5E4	1	cxsmiles	JChemExcelNgAAAB+LCAAAAAAABADtvQdgHEmWJSYvbcp7f0r1StfgdKEIgGATJNiQQBDswYjN5pLsHWlHIymrKoHKZVZlXWYWQMztnbz33nvvvffee++997o7nU4n99//P1xmZAFs9s5K2smeIYCqyB8/fnwfPyJOtr538nv+nt/+/u7Ji62Tkxe7d6Z7y+l0uvXl9B5+TKf37iz3p9PldP/Ocu/O9P4Uz/3/B4BPDe42AAAA
6BDA424777221D85B69DAADEB374B92A	1	cxsmiles	JChemExcelQgAAAB+LCAAAAAAABADtvQdgHEmWJSYvbcp7f0r1StfgdKEIgGATJNiQQBDswYjN5pLsHWlHIymrKoHKZVZlXWYWQMztnbz33nvvvffee++997o7nU4n99//P1xmZAFs9s5K2smeIYCqyB8/fnwfPyJOTna3Tr6c7k2n063pdO/Oi3snJydbJyf37nw53ceHX55sPbtD/3t2Zzrdv3OyvE+fLaf3v9y982Lrsy/vfPbl/wNvwbxiQgAAAA==
511F92602E116ACC3C6826A0055D20DF	1	cxsmiles	JChemExcelOQAAAB+LCAAAAAAABADtvQdgHEmWJSYvbcp7f0r1StfgdKEIgGATJNiQQBDswYjN5pLsHWlHIymrKoHKZVZlXWYWQMztnbz33nvvvffee++997o7nU4n99//P1xmZAFs9s5K2smeIYCqyB8/fnwfPyJOTrY++/LOi5OT3ZMXW/z7l7t3pnvT6XRruvWMfrszvYc/Tl6cTPeny+8tv/395f6d6fTe/wPePzbzOQAAAA==
E2A21B38010ECB1AC2374E46761E7970	1	cxsmiles	JChemExcelNQAAAB+LCAAAAAAABADtvQdgHEmWJSYvbcp7f0r1StfgdKEIgGATJNiQQBDswYjN5pLsHWlHIymrKoHKZVZlXWYWQMztnbz33nvvvffee++997o7nU4n99//P1xmZAFs9s5K2smeIYCqyB8/fnwfPyJOlrvT6XK6e/Li5OT11mdf3sH/p3tTerZeTO/hx3R57850nz95Rr/cme79P+vxfsQ1AAAA
284BBFF02C256CE213C53FB986D635DE	1	cxsmiles	JChemExcelLgAAAB+LCAAAAAAABADtvQdgHEmWJSYvbcp7f0r1StfgdKEIgGATJNiQQBDswYjN5pLsHWlHIymrKoHKZVZlXWYWQMztnbz33nvvvffee++997o7nU4n99//P1xmZAFs9s5K2smeIYCqyB8/fnwfPyJOTrY++/LOi5OT3ZMXW/z7l7t3pnvT6XRruvWMfrszvYc/Tr68M53e+38ANpOlxy4AAAA=
489E0FC2ED4467595668DA0DCB193291	1	cxsmiles	JChemExcelIQAAAB+LCAAAAAAABADtvQdgHEmWJSYvbcp7f0r1StfgdKEIgGATJNiQQBDswYjN5pLsHWlHIymrKoHKZVZlXWYWQMztnbz33nvvvffee++997o7nU4n99//P1xmZAFs9s5K2smeIYCqyB8/fnwfPyJOXkx3m+V06+TOdPdk67Mv77w4OflyujedTre+pM+me/8PRrMZAyEAAAA=
43C72D4267046C135053358D442DF5FF	1	cxsmiles	JChemExcelLgAAAB+LCAAAAAAABADtvQdgHEmWJSYvbcp7f0r1StfgdKEIgGATJNiQQBDswYjN5pLsHWlHIymrKoHKZVZlXWYWQMztnbz33nvvvffee++997o7nU4n99//P1xmZAFs9s5K2smeIYCqyB8/fnwfPyJOTrY++/LOi5Pvnfye3/7+7smLLf77y907073pdLr14t7JyeuTk3t3plvP7kz3/h8UQ/fZLgAAAA==
107420BE223F9EBB3AFC9F6C31E49023	1	cxsmiles	JChemExcelNAAAAB+LCAAAAAAABADtvQdgHEmWJSYvbcp7f0r1StfgdKEIgGATJNiQQBDswYjN5pLsHWlHIymrKoHKZVZlXWYWQMztnbz33nvvvffee++997o7nU4n99//P1xmZAFs9s5K2smeIYCqyB8/fnwfPyK+/Oxk68V0d4pn98XeycmXJyd7d7538nv+nt/+/tbJ9B5/ce/Oi5Otz768M92nP5r9/wfpJR09NAAAAA==
BE73317C31EECC73546F817618CA70E4	1	cxsmiles	JChemExcelMwAAAB+LCAAAAAAABADtvQdgHEmWJSYvbcp7f0r1StfgdKEIgGATJNiQQBDswYjN5pLsHWlHIymrKoHKZVZlXWYWQMztnbz33nvvvffee++997o7nU4n99//P1xmZAFs9s5K2smeIYCqyB8/fnwfPyJOvpzuTqdbT+o70+neyWcnWydbn31558X03pSerem9Oydbz+7Q/57d4S+o9d7/A+AyoAUzAAAA
0CF5D94906349A94F0C274FA29968CE3	1	cxsmiles	JChemExcelLAAAAB+LCAAAAAAABADtvQdgHEmWJSYvbcp7f0r1StfgdKEIgGATJNiQQBDswYjN5pLsHWlHIymrKoHKZVZlXWYWQMztnbz33nvvvffee++997o7nU4n99//P1xmZAFs9s5K2smeIYCqyB8/fnwfPyKenWw9u0P/O9n97GTrZOvF3gmevTuffXnnxdbJZyf0v3tfntw5uffZi93/BxxPjZcsAAAA
11DBA37177E675CED1CE4804D81CA538	1	cxsmiles	JChemExcelMQAAAB+LCAAAAAAABADtvQdgHEmWJSYvbcp7f0r1StfgdKEIgGATJNiQQBDswYjN5pLsHWlHIymrKoHKZVZlXWYWQMztnbz33nvvvffee++997o7nU4n99//P1xmZAFs9s5K2smeIYCqyB8/fnwfPyJOTqa7y+nedDrdmi73prsvtk7unEzv0d/NvTsnW599eefFyXSf/rz/5cmX0/vT/f8HDwgKsTEAAAA=

## Sheet: Table S1
			SOMULE DESCRIPTORS (10 uM)				SOMULE SEVERITY SCORE
PLATE	WELL	SMILES	24 h	48 h	72 h		24 h	48 h	72 h
P1	A2	MMV010764					0	0	0		Descriptior Key
P1	B2	MMV1110498					0	0	0		D = dead
P1	C2	MMV084603					0	0	0		O = overactive
P1	D2	MMV687762					0	0	0		S = Slow
P1	E2	MMV688514	R, S	R			2	1	0		Deg= degenerating
P1	F2	MMV026020					0	0	0		Dark = dark
P1	G2	MMV688470					0	0	0		I = immobilized
P1	H2	MMV688350					0	0	0		R = shape altered from normal (either larger or smaller; longer or shorter)
P1	A3	MMV688472		R, Dark	R, dark		0	2	2		teg bleb = tegumental damage
P1	B3	MMV000907					0	0	0		P.D. = partial death, i.e., a proportion of the somules per well are apparently dead (expressed in %)
P1	C3	MMV688548	O				1	0	0
P1	D3	MMV1028806					0	0	0		Coverting descriptors to a Severity Score
P1	E3	MMV676350	R	S			1	1	0		Each descriptor awarded a score of 1. Its possible to have more than one descriptor per well.
P1	F3	MMV688471	O				1	0	0		Deg, Teg bleb and D trump and are awarded a score of 4
P1	G3	MMV688704					0	0	0		Maximum score is 4
P1	H3	MMV688360	R				1	0	0
P1	A4	MMV688416					0	0	0
P1	B4	MMV688889		R			0	1	0
P1	C4	MMV688888					0	0	0
P1	D4	MMV661713	R	R, Deg	D		1	4	4
P1	E4	MMV553002					0	0	0
P1	F4	MMV676388	D	D	D		4	4	4
P1	G4	MMV188296					0	0	0
P1	H4	MMV099637					0	0	0
P1	A5	MMV689758	R, Dark	D	D		2	4	4
P1	B5	MMV688776					0	0	0
P1	C5	MMV690028	O				1	0	0
P1	D5	MMV688793					0	0	0
P1	E5	MMV688797	O				1	0	0
P1	F5	MMV202553	O				1	0	0
P1	G5	MMV688958	O				1	0	0
P1	H5	MMV688798		O			0	1	0
P1	A6	MMV688796	O				1	0	0
P1	B6	MMV688934	R	O	O, Dark		1	1	2
P1	C6	MMV688943	R, O	Dark	O, Dark		2	1	2
P1	D6	MMV688942	O				1	0	0
P1	E6	MMV688756					0	0	0
P1	F6	MMV688936					0	0	0
P1	G6	MMV063404	R, S				2	0	0
P1	H6	MMV676539	R				1	0	0
P1	A7	MMV676526		Dark			0	1	0
P1	B7	MMV676389					0	0	0
P1	C7	MMV053220		R			0	1	0
P1	D7	MMV688554	O				1	0	0
P1	E7	MMV090930					0	0	0
P1	F7	MMV676476	O	R			1	1	0
P1	G7	MMV676558					0	0	0
P1	H7	MMV202458					0	0	0
P1	A8	MMV688553					0	0	0
P1	B8	MMV676603	O				1	0	0
P1	C8	MMV676584					0	0	0
P1	D8	MMV676555					0	0	0
P1	E8	MMV676431					0	0	0
P1	F8	MMV676377					0	0	0
P1	G8	MMV688555					0	0	0
P1	H8	MMV676474					0	0	0
P1	A9	MMV676501	R, S	Deg, O	Deg, D		2	4	4
P1	B9	MMV676401	R, Dark, S	R, S	R, Deg		3	2	4
P1	C9	MMV676439					0	0	0
P1	D9	MMV676383	R, Dark	D	D		2	4	4
P1	E9	MMV676571			dark		0	0	1
P1	F9	MMV676406	R, Dark		P.D. 50		2	0	1
P1	G9	MMV676597					0	0	0
P1	H9	MMV461553	R, Dark	D	D		2	4	4
P1	A10	MMV676449					0	0	0
P1	B10	MMV102872		Deg	D		0	4	4
P1	C10	MMV676395					0	0	0
P1	D10	MMV676444					0	0	0
P1	E10	MMV676445					0	0	0
P1	F10	MMV676461	Dark	P.D. 50			1	1	0
P1	G10	MMV676588	S, Deg	R, Deg	R, S, deg		4	4	4
P1	H10	MMV676520					0	0	0
P1	A11	MMV676412					0	0	0
P1	B11	MMV676477	R,S	R, S	S		2	2	1
P1	C11	MMV676379					0	0	0
P1	D11	MMV676409					0	0	0
P1	E11	MMV676589	R,O+	Deg, R, O	Deg, R, O		2	4	4
P1	F11	MMV676509	O				1	0	0
P1	G11	MMV676554					0	0	0
P1	H11	MMV676512					0	0	0
P2	A2	MMV676480		R, S, Dark	R, S		0	3	2
P2	B2	MMV012074					0	0	0
P2	C2	MMV690027	R, O				2	0	0
P2	D2	MMV020537					0	0	0
P2	E2	MMV676386					0	0	0
P2	F2	MMV019189					0	0	0
P2	G2	MMV069458	R				1	0	0
P2	H2	MMV676602	R, O, Dark	R, Deg	R, Deg, S		3	4	4
P2	A3	MMV652003					0	0	0
P2	B3	MMV676604					0	0	0
P2	C3	MMV676600					0	0	0
P2	D3	MMV637953					0	0	0
P2	E3	MMV688773					0	0	0
P2	F3	MMV688774	R, O, P.D. 50	R, Deg	R, Deg, S		3	4	4
P2	G3	MMV688991	R, Dark	R, Deg	R, Deg		2	4	4
P2	H3	MMV000014	R, Deg	D	D		4	4	4
P2	A4	MMV000062					0	0	0
P2	B4	MMV002529	R, O, Deg	R, O, Deg	R, Deg		4	4	4
P2	C4	MMV676382	R, Deg, S	R, Deg, S	R, Deg, S		4	4	4
P2	D4	MMV676536					0	0	0
P2	E4	MMV000011					0	0	0
P2	F4	MMV003270					0	0	0
P2	G4	MMV687801					0	0	0
P2	H4	MMV687803					0	0	0
P2	A5	MMV006372	O		Dark		1	0	1
P2	B5	MMV687776					0	0	0
P2	C5	MMV001625					0	0	0
P2	D5	MMV000063					0	0	0
P2	E5	MMV687775	R, S		P.D. 70		2	0	1
P2	F5	MMV637229	R, Dark	R, Deg	R, Deg		2	4	4
P2	G5	MMV689480					0	0	0
P2	H5	MMV668727					0	0	0
P2	A6	MMV688854					0	0	0
P2	B6	MMV687800	R, Deg	D	D		4	4	4
P2	C6	MMV001493	S				1	0	0
P2	D6	MMV689255					0	0	0
P2	E6	MMV002817	R, O	R	R, O		2	1	2
P2	F6	MMV688853					0	0	0
P2	G6	MMV003152					0	0	0
P2	H6	MMV019742	R, O	R, S	R		2	2	1
P2	A7	MMV011903	R, dark, I	Deg, O	Deg, R		3	4	4
P2	B7	MMV020982					0	0	0
P2	C7	MMV020136					0	0	0
P2	D7	MMV019838					0	0	0
P2	E7	MMV676442					0	0	0
P2	F7	MMV020321					0	0	0
P2	G7	MMV006239					0	0	0
P2	H7	MMV009054					0	0	0
P2	A8	MMV020591					0	0	0
P2	B8	MMV020120	R				1	0	0
P2	C8	MMV020710					0	0	0
P2	D8	MMV020520		O			0	1	0
P2	E8	MMV020152					0	0	0
P2	F8	MMV019087					0	0	0
P2	G8	MMV000858	O				1	0	0
P2	H8	MMV006901	O				1	0	0
P2	A9	MMV020623	R, Deg	R, Deg	R, Deg		4	4	4
P2	B9	MMV676605					0	0	0
P2	C9	MMV020517					0	0	0
P2	D9	MMV019234					0	0	0
P2	E9	MMV024397					0	0	0
P2	F9	MMV676528					0	0	0
P2	G9	MMV006741					0	0	0
P2	H9	MMV020391	R, S	R, Deg	R,deg		2	4	4
P2	A10	MMV020512	R, S	R, Dark			2	2	0
P2	B10	MMV007638			Dark		0	0	1
P2	C10	MMV019721	Dark				1	0	0
P2	D10	MMV016136					0	0	0
P2	E10	MMV019807			R		0	0	1
P2	F10	MMV020320					0	0	0
P2	G10	MMV688768	R, S, Dark	R, Deg	D		3	4	4
P2	H10	MMV676380					0	0	0
P2	A11	MMV688761	Deg	D	D		4	4	4
P2	B11	MMV021057					0	0	0
P2	C11	MMV688763	D	D	D		4	4	4
P2	D11	MMV688762	D	D	D		4	4	4
P2	E11	MMV560185	R		R		1	0	1
P2	F11	MMV085210					0	0	0
P2	G11	MMV000023					0	0	0
P2	H11	MMV688994					0	0	0
P3	A2	MMV675997					0	0	0
P3	B2	MMV020388					0	0	0
P3	C2	MMV688508		O			0	1	0
P3	D2	MMV688410					0	0	0
P3	E2	MMV675994					0	0	0
P3	F2	MMV676053					0	0	0
P3	G2	MMV676191					0	0	0
P3	H2	MMV675969					0	0	0
P3	A3	MMV676204	O		Dark		1	0	1
P3	B3	MMV688547					0	0	0
P3	C3	MMV688283	R, Dark	R, Deg	R, Deg, S		2	4	4
P3	D3	MMV676048					0	0	0
P3	E3	MMV676057					0	0	0
P3	F3	MMV688179					0	0	0
P3	G3	MMV675993					0	0	0
P3	H3	MMV688313	O				1	0	0
P3	A4	MMV687239					0	0	0
P3	B4	MMV688466					0	0	0
P3	C4	MMV687243	R	R	R, S		1	1	2
P3	D4	MMV687703	R, O, Deg	R, Deg	R, Deg		4	4	4
P3	E4	MMV687699		R			0	1	0
P3	F4	MMV023969	R, S, Dark	R, S, Dark	R, S, deg		3	3	4
P3	G4	MMV021660	R, Deg, S	R, Deg	D		4	4	4
P3	H4	MMV687172			R		0	0	1
P3	A5	MMV688122	O	R, O, Dark	R, Deg		1	3	4
P3	B5	MMV687749					0	0	0
P3	C5	MMV687730	R, S, Dark	R, Deg	R, Deg		3	4	4
P3	D5	MMV687248	R, O	Dark	Dark		2	1	1
P3	E5	MMV687146		R			0	1	0
P3	F5	MMV687138					0	0	0
P3	G5	MMV688417	R, Deg	R, Deg	D		4	4	4
P3	H5	MMV688844					0	0	0
P3	A6	MMV688852					0	0	0
P3	B6	MMV688846					0	0	0
P3	C6	MMV687251	D	D	D		4	4	4
P3	D6	MMV688125	O				1	0	0
P3	E6	MMV687696	O				1	0	0
P3	F6	MMV688262					0	0	0
P3	G6	MMV687273	R, Deg	D	D		4	4	4
P3	H6	MMV1198433					0	0	0
P3	A7	MMV687145					0	0	0
P3	B7	MMV054312					0	0	0
P3	C7	MMV687254	O		R		1	0	1
P3	D7	MMV687188					0	0	0
P3	E7	MMV687170					0	0	0
P3	F7	MMV687189					0	0	0
P3	G7	MMV687180	S	R			1	1	0
P3	H7	MMV024311					0	0	0
P3	A8	MMV688327					0	0	0
P3	B8	MMV689060	O				1	0	0
P3	C8	MMV688509					0	0	0
P3	D8	MMV690103					0	0	0
P3	E8	MMV690102	O, Deg	D	D		4	4	4
P3	F8	MMV687807	R, S, Deg	D	D		4	4	4
P3	G8	MMV1088520		R			0	1	0
P3	H8	MMV1019989					0	0	0
P3	A9	MMV008439			R		0	0	1
P3	B9	MMV689061					0	0	0
P3	C9	MMV688361					0	0	0
P3	D9	MMV688124	R	R, Dark	R, Deg		1	2	4
P3	E9	MMV689709					0	0	0
P3	F9	MMV676478	Dark	R			1	1	0
P3	G9	MMV688891					0	0	0
P3	H9	MMV1037162					0	0	0
P3	A10	MMV595321					0	0	0
P3	B10	MMV689028		R	R		0	1	1
P3	C10	MMV689029			R		0	0	1
P3	D10	MMV688845					0	0	0
P3	E10	MMV021375					0	0	0
P3	F10	MMV062221	R, S	dark	Deg, S		2	1	4
P3	G10	MMV023370					0	0	0
P3	H10	MMV689437					0	0	0
P3	A11	MMV687747					0	0	0
P3	B11	MMV688371					0	0	0
P3	C11	MMV022236			Dark		0	0	1
P3	D11	MMV1030799	O				1	0	0
P3	E11	MMV1029203					0	0	0
P3	F11	MMV688921					0	0	0
P3	G11	MMV688703					0	0	0
P3	H11	MMV688955					0	0	0
P4	A2	MMV026468					0	0	0
P4	B2	MMV011511					0	0	0
P4	C2	MMV020291	O				1	0	0
P4	D2	MMV676269					0	0	0
P4	E2	MMV023233	D	D	D		4	4	4
P4	F2	MMV009135					0	0	0
P4	G2	MMV007803	R		Dark		1	0	1
P4	H2	MMV007133	O				1	0	0
P4	A3	MMV020670	S				1	0	0
P4	B3	MMV007625					0	0	0
P4	C3	MMV006833					0	0	0
P4	D3	MMV020081	O	O	O		1	1	1
P4	E3	MMV085230					0	0	0
P4	F3	MMV011765		R	R, Dark		0	1	2
P4	G3	MMV001059	R, O	R, Deg	D		2	4	4
P4	H3	MMV022478	R, O	R, Deg	D		2	4	4
P4	A4	MMV023953	R	O, Dark	R, Deg		1	2	4
P4	B4	MMV007471					0	0	0
P4	C4	MMV026490		R, Dark			0	2	0
P4	D4	MMV026550					0	0	0
P4	E4	MMV085071	Dark, R, S	R, dark	R,S		3	2	2
P4	F4	MMV024937					0	0	0
P4	G4	MMV011691			R, Dark		0	0	2
P4	H4	MMV024101					0	0	0
P4	A5	MMV010576	R, S	R	R		2	1	1
P4	B5	MMV024829					0	0	0
P4	C5	MMV687246					0	0	0
P4	D5	MMV675995	O	O			1	1	0
P4	E5	MMV659004	R, S	R			2	1	0
P4	F5	MMV085499	R, S	R, S	R, Deg		2	2	4
P4	G5	MMV676877					0	0	0
P4	H5	MMV676881	D	D	D		4	4	4
P4	A6	MMV032967					0	0	0
P4	B6	MMV045105					0	0	0
P4	C6	MMV676162					0	0	0
P4	D6	MMV688274					0	0	0
P4	E6	MMV676260					0	0	0
P4	F6	MMV023985	R, O	R, Deg	R, Deg		2	4	4
P4	G6	MMV663250	R	D	D		1	1	4
P4	H6	MMV024443					0	0	0
P4	A7	MMV031011					0	0	0
P4	B7	MMV022029		R, Dark	R, Deg, O		0	2	4
P4	C7	MMV024114	R, O	R, O, Dark	R, O, Dark		2	3	3
P4	D7	MMV023860					0	0	0
P4	E7	MMV688364	R	R, Deg	R, Deg, S		1	4	4
P4	F7	MMV024195					0	0	0
P4	G7	MMV407539	R				1	0	0
P4	H7	MMV688469	R	R, S	R, S, Dark		1	2	3
P4	A8	MMV688178			R, Dark		0	0	2
P4	B8	MMV676064	O				1	0	0
P4	C8	MMV688467					0	0	0
P4	D8	MMV688407	R				1	0	0
P4	E8	MMV032995					0	0	0
P4	F8	MMV676063					0	0	0
P4	G8	MMV688372		Deg, S	R, Deg		0	4	4
P4	H8	MMV023388					0	0	0
P4	A9	MMV688362					0	0	0
P4	B9	MMV688180					0	0	0
P4	C9	MMV675998					0	0	0
P4	D9	MMV023949			S		0	0	1
P4	E9	MMV688279					0	0	0
P4	F9	MMV676186					0	0	0
P4	G9	MMV658993		R. Deg	R, Deg		0	4	4
P4	H9	MMV675968					0	0	0
P4	A10	MMV687706	R, S	R, S	R, S		2	2	2
P4	B10	MMV024035					0	0	0
P4	C10	MMV659010	R	R, Dark	R, Deg, S		1	2	4
P4	D10	MMV676050					0	0	0
P4	E10	MMV688271					0	0	0
P4	F10	MMV688474	O				1	0	0
P4	G10	MMV676182					0	0	0
P4	H10	MMV675996					0	0	0
P4	A11	MMV026356					0	0	0
P4	B11	MMV688941	O	O			1	1	0
P4	C11	MMV676008					0	0	0
P4	D11	MMV024406	R, O	R, Deg	R, Deg		2	4	4
P4	E11	MMV019790					0	0	0
P4	F11	MMV687812					0	0	0
P4	G11	MMV676411	R, O		R, Deg		2	0	4
P4	H11	MMV688980			R		0	0	1
P5	A2	MMV011229					0	0	0
P5	B2	MMV687794	O				1	0	0
P5	C2	MMV676398	R, S	R			2	1	0
P5	D2	MMV688766					0	0	0
P5	E2	MMV020289					0	0	0
P5	F2	MMV019551		R	R		0	1	1
P5	G2	MMV146306					0	0	0
P5	H2	MMV688330					0	0	0
P5	A3	MMV676468					0	0	0
P5	B3	MMV676470					0	0	0
P5	C3	MMV676472	R, S	R, Dark	R, Dark		2	2	2
P5	D3	MMV200748		R, Dark			0	2	0
P5	E3	MMV002816					0	0	0
P5	F3	MMV688552					0	0	0
P5	G3	MMV688557	S	dark	R, dark		1	1	2
P5	H3	MMV687796					0	0	0
P5	A4	MMV688771	R	R, Dark			1	2	0
P5	B4	MMV688938					0	0	0
P5	C4	MMV671636	R, Dark	Deg	R, Deg		2	4	4
P5	D4	MMV667494	R, O	R, Deg	R, Deg		2	4	4
P5	E4	MMV634140					0	0	0
P5	F4	MMV016838		R, S	R		2	1	0
P5	G4	MMV021013					0	0	0
P5	H4	MMV688939	R, dark, S	Deg, R	Deg, R		3	4	4
P5	A5	MMV687798					0	0	0
P5	B5	MMV689000					0	0	0
P5	C5	MMV676599					0	0	0
P5	D5	MMV028694		Dark	R, Deg		0	1	4
P5	E5	MMV030734					0	0	0
P5	F5	MMV676270					0	0	0
P5	G5	MMV392832					0	0	0
P5	H5	MMV688978	D	D	D		4	4	4
P5	A6	MMV688775					0	0	0
P5	B6	MMV004168					0	0	0
P5	C6	MMV689244		R, dark	R, deg		0	2	4
P5	D6	MMV001499					0	0	0
P5	E6	MMV689243			O		0	0	1
P5	F6	MMV688755					0	0	0
P5	G6	MMV688754	R				1	0	0
P5	H6	MMV688990					0	0	0
P5	A7	MMV676159	R, S, Dark	R, deg, S	R, deg, S		3	4	4
P5	B7	MMV676161					0	0	0
P5	C7	MMV688411					0	0	0
P5	D7	MMV688345					0	0	0
P5	E7	MMV676358					0	0	0
P5	F7	MMV228911					0	0	0
P5	G7	MMV001561		D	D		0	0	0
P5	H7	MMV688273	R, Deg	R, Deg	D		4	4	4
P5	A8	MMV393144		R, Dark	R, Deg		0	2	4
P5	B8	MMV023183					0	0	0
P5	C8	MMV687765	R, Deg	R, Deg	D		4	4	4
P5	D8	MMV010545					0	0	0
P5	E8	MMV687729			R, dark		0	0	2
P5	F8	MMV272144	D	D	D		4	4	4
P5	G8	MMV658988	R	R, Deg	D		1	4	4
P5	H8	MMV393995					0	0	0
P5	A9	MMV007920					0	0	0
P5	B9	MMV047015					0	0	0
P5	C9	MMV020165			O		0	0	1
P5	D9	MMV023227					0	0	0
P5	E9	MMV407834					0	0	0
P5	F9	MMV026313					0	0	0
P5	G9	MMV084864					0	0	0
P5	H9	MMV1236379					0	0	0
P5	A10	MMV688270	R, O	R, Deg	R, Deg		2	4	4		Descriptior Key
P5	B10	MMV688795					0	0	0		D = dead
P5	C10	MMV676524					0	0	0		O = overactive
P5	D10	MMV687700					0	0	0		S = Slow
P5	E10	MMV687813					0	0	0		Deg= degenerating
P5	F10	MMV161996					0	0	0		Dark = dark
P5	G10	MMV676492					0	0	0		I = immobilized
P5	H10	MMV688550	O				1	0	0		R = shape altered from normal (either larger or smaller; longer or shorter)
P5	A11	MMV019993					0	0	0		teg bleb = tegumental damage
P5	B11	MMV688352	R	R			1	1	0		P.D. = partial death, i.e., a proportion of the somules per well are apparently dead (expressed in %)
P5	C11	MMV611037					0	0	0
P5	D11	MMV676384					0	0	0		Coverting descriptors to a Severity Score
P5	E11	MMV153413	S				1	0	0		Each descriptor awarded a score of 1. Its possible to have more than one descriptor per well.
P5	F11	MMV688543		dark	Deg, R		0	2	4		Deg, Teg bleb and D trump and are awarded a score of 4
P5	G11	MMV688415					0	0	0		Maximum score is 4
P5	H11	MMV495543		dark	dark		0	1	1

## Sheet: Table S2 
Venn diagramm							UCSD scores			Swiss TPH scores			FIOCRUZ (% viability @ 72 h)		Core actives in all assays at 72 h	Unique FIOCRUZ actives at 72 h	Compounds increasing metabolic activity over 130% of baseline in the FIOCRUZ assay at 72 h	Compounds increasing metabolic activity above 130% of baseline in the FIOCRUZ assay at 72 h AND a hit in at least one other assay at any time point
Rack	Position	COMPOUND ID	Disease Set	SMILES	STRUCTURE	TRIVIAL NAME	24 h	48 h	72h	24 h	48 h	72 h	mean	SD
PathogenBox_PlateA	A02	MMV010764	MALARIA	C(Nc1nn2c(cnc2s1)c3cccs3)C4CCOCC4	#NAME?		0	0	0	0.181818	0.55	0.345455	95.6631	34.0037					Venn diagramms
PathogenBox_PlateA	A03	MMV688472	TOXOPLASMOSIS	CC(Oc1cccc(Cl)c1)C(=O)Nc1ccc2oc(nc2c1)-c1ccncc1	#NAME?		1	0	0	0.318182	0.45	0.563636	108.782	9.86679					24h	U	S	U+S	sum		48h	U	S	U+S	sum	Rules applied
PathogenBox_PlateA	A04	MMV688416	DENGUE	CC(C)(C)OC(=O)N1CCN(CC1)c2nccc(n2)c3ccc(s3)c4ccc(Cl)cc4	#NAME?		0	0	0	0.181818	0.15	0.181818	93.7397	46.3507					# actives	44	7	29			# actives	31	21	48		U ≥2
PathogenBox_PlateA	A05	MMV689758	REFERENCE	COc1nc2ccc(Br)cc2cc1[C@@H](c3ccccc3)[C@@](O)(CCN(C)C)c4cccc5ccccc45	#NAME?	Bedaquiline	2	4	4	0.318182	0.8	0.945455	7.22669	3.69101	1				# inactives	7	44	320	400		# inactives	21	31	300	400	S ≥ 0.5
PathogenBox_PlateA	A06	MMV688796	KINETOPLASTIDS	Fc1ccc(cc1)c2oc(cc2)C(=O)NCc3nnc4CCCCCn34	#NAME?		1	0	0	0.136364	0.15	0.181818	97.1009	16.9521					% actives	11	1.75	7.25			% actives	7.75	5.25	12		F ≤ 50
PathogenBox_PlateA	A07	MMV676526	TUBERCULOSIS	COc1ccc(cc1)c2cc(NC(=O)c3ccc(F)cc3Cl)ccc2OC	#NAME?		0	1	0	0.0909091	0.25	0.236364	89.6907	37.4438					% inactives	1.75	11	80			% inactives	5.25	7.75	75
PathogenBox_PlateA	A08	MMV688553	TUBERCULOSIS	O=C(NCc1cocc1)N2CCN(Cc3ccc4OCOc4c3)CC2	#NAME?		0	0	0	0.136364	0.2	0.181818	76.2359	21.4293
PathogenBox_PlateA	A09	MMV676501	TUBERCULOSIS	Clc1ccc(s1)C(=O)Nc2oc(nn2)c3ccc(Cl)s3	#NAME?		2	4	4	0	0	0	-3.40431	1.29876
PathogenBox_PlateA	A10	MMV676449	TUBERCULOSIS	CCc1nc2ccccc2n1CC(O)COc3cc(C)ccc3Cl	#NAME?		0	0	0	0.0909091	0.25	0.236364	105.649	34.9					72h	U	S	F	U+S	U+F	S+F	U+S+F	sum
PathogenBox_PlateA	A11	MMV676412	TUBERCULOSIS	Clc1ccc(cc1)S(=O)(=O)c2oc(nc2C#N)c3ccccc3	#NAME?		0	0	1	1	1	1	-7.60985	0.549823					# actives	12	29	19	33	6	6	35
PathogenBox_PlateA	B02	MMV1110498	WOLBACHIA LF	FC(F)(F)C1=C(C(N2CCCCC2)=O)N(C=CC=C3OC)C3=N1	#NAME?		0	0	0	0.181818	0.2	0.127273	95.731	30.2493					# inactives	6	6	33	19	29	12	260	400
PathogenBox_PlateA	B03	MMV000907	MALARIA	COc1cccc2c(C)nc(N=C(N)N)nc12	#NAME?		0	0	0	0.181818	0.2	0.127273	93.3217	22.4893					% actives	3	7.25	4.75	8.25	1.5	1.5	8.75
PathogenBox_PlateA	B04	MMV688889	TUBERCULOSIS	Clc1ccc(CCNc2cc(nc3ncnn23)c4ccccc4)cc1	#NAME?		0	1	0	0.136364	0.2	0.127273	83.8549	52.6284					% inactives	1.5	1.5	8.25	4.75	7.25	3	65
PathogenBox_PlateA	B05	MMV688776	KINETOPLASTIDS	Cc1nn2C(=O)C3=C(CCCC3)Nc2c1c4ccc(Cl)cc4	#NAME?		0	0	0	0.136364	0.2	0.127273	100.779	11.9423
PathogenBox_PlateA	B06	MMV688934	KINETOPLASTIDS	CCc1nn(C)c(C(=O)NCc2ccc(Oc3ccc(C)cc3)cc2)c1Cl	#NAME?	Tolfenpyrad	1	1	2	0.363636	0.55	0.454545	72.7914	36.3126
PathogenBox_PlateA	B07	MMV676389	TUBERCULOSIS	O=C(N1CCN(Cc2ccc3OCOc3c2)CC1)c4[nH]nc5CCCCc45	#NAME?		0	0	0	0.0909091	0.25	0.236364	89.6344	35.0204
PathogenBox_PlateA	B08	MMV676603	TUBERCULOSIS	CC1COC2(CCN(CC2)C3=NC(=O)c4cc(cc(c4S3)[N+](=O)[O-])C(F)(F)F)O1	#NAME?		1	0	0	0.136364	0.25	0.290909	79.9657	43.1103					Strong hits
PathogenBox_PlateA	B09	MMV676401	TUBERCULOSIS	C(Nc1nc(nc2ccccc12)N3CCCCC3)c4occc4	#NAME?		3	2	4	1	1	1	99.4827	5.03374					24h	U	S	U+S	sum		48h	U	S	U+S	sum	Rules applied
PathogenBox_PlateA	B10	MMV102872	TUBERCULOSIS	FC(F)(F)c1cccc(c1)C(=O)Nc2oc(nn2)c3ccc(Cl)cc3	#NAME?		0	4	4	0.0909091	0.25	0.945455	-9.98354	3.73931	1				# actives	20	10	16			# actives	30	10	29		U ≥3
PathogenBox_PlateA	B11	MMV676477	TUBERCULOSIS	CCC1=C(C)N=C(NC1=O)n2nc(C)cc2NC(=O)c3ccccc3SC	#NAME?		0	1	3	0.272727	0.95	1	-1.12847	3.93966	1				# inactives	10	20	354	400		# inactives	10	30	331	400	S ≥ 0.75
PathogenBox_PlateA	C02	MMV084603	MALARIA	O=C1N(Cc2cc3ccccc3s2)CC4CN(Cc5ccccc5)CCN14	#NAME?		0	0	0	0.181818	0.3	0.236364	87.1661	35.0453					% actives	5	2.5	4			% actives	7.5	2.5	7.25		F ≤ 0.75
PathogenBox_PlateA	C03	MMV688548	TOXOPLASMOSIS	CC(C)(C)n1nc(-c2ccccc2)c2c(N)ncnc12	#NAME?		1	0	0	0.181818	0.2	0.127273	105.55	13.667					% inactives	2.5	5	88.5			% inactives	2.5	7.5	82.75
PathogenBox_PlateA	C04	MMV688888	TUBERCULOSIS	CN1CCN(CC1)c2cc(nc(n2)c3ccncc3)c4ccc(F)cc4	#NAME?		0	0	0	0.181818	0.35	0.345455	63.0392	22.186
PathogenBox_PlateA	C05	MMV690028	KINETOPLASTIDS	COC1=C(OCCCCOC2=CC=C(C3=NNN=N3)C=C2)C=C(C4=NN(C5CCCCCC5)C(C4(C)C)=O)C=C1	#NAME?		1	0	0	0.181818	0.2	0.127273	3.50642	1.44317		1
PathogenBox_PlateA	C06	MMV688943	KINETOPLASTIDS	CC1COC(Cn2cncn2)(O1)c3ccc(Oc4ccc(Cl)cc4)cc3Cl	#NAME?	Difenoconazol	2	1	2	0.136364	0.25	0.0727273	47.315	26.9021					72h	U	S	F	U+S	U+F	S+F	U+S+F	sum
PathogenBox_PlateA	C07	MMV053220	TUBERCULOSIS	NC(=O)COc1ccc(cc1)c2ccc(cc2)C#N	#NAME?		0	1	0	0.181818	0.2	0.127273	73.9293	12.4692					# actives	29	9	5	32	1	1	11
PathogenBox_PlateA	C08	MMV676584	TUBERCULOSIS	Fc1ccc2c(Cl)c(sc2c1)C(=O)NC3=NCCS3	#NAME?		0	0	0	0.0909091	0.1	0.0181818	81.0216	22.1704					# inactives	1	1	32	5	9	29	312	400
PathogenBox_PlateA	C09	MMV676439	TUBERCULOSIS	Cc1ccc2nc(Cl)c(CNCc3cccs3)cc2c1	#NAME?		0	0	0	0.181818	0.2	0.0727273	83.1935	7.16136					% actives	7.25	2.25	1.25	8	0.25	0.25	2.75
PathogenBox_PlateA	C10	MMV676395	TUBERCULOSIS	OC1=C(C(=O)Nc2cccnc2)C(=O)N3CCc4cccc1c34	#NAME?		0	0	0	0.181818	0.2	0.0727273	118.454	0.730255					% inactives	0.25	0.25	8	1.25	2.25	7.25	78
PathogenBox_PlateA	C11	MMV676379	TUBERCULOSIS	COc1cccc(OCC(=O)c2ccc(Br)cc2)c1	#NAME?		0	0	0	0.181818	0.2	0.127273	101.469	20.7863
PathogenBox_PlateA	D02	MMV687762	KINETOPLASTIDS	C1CC(CCO1)c2cc(n[nH]2)c3ccc(Oc4ccccc4)cc3	#NAME?		0	0	0	0.181818	0.35	0.127273	98.406	16.4541
PathogenBox_PlateA	D03	MMV1028806	MALARIA	Fc1ccccc1C2CC2C(=O)Nc3nc(cs3)c4ccccn4	#NAME?		0	0	0	0.181818	0.3	0.127273	71.7073	6.6542
PathogenBox_PlateA	D04	MMV661713	TUBERCULOSIS	Brc1cncc(c1)c2cc(NCCCn3ccnc3)nc(n2)c4ccccc4	#NAME?		1	4	4	0.272727	0.65	0.672727	12.8791	10.0789	1
PathogenBox_PlateA	D05	MMV688793	KINETOPLASTIDS	Cc1onc(C)c1COc2cccc(c2)C(=O)Nc3ncccc3C	#NAME?		0	0	0	0.0909091	0.15	0.127273	113.538	1.02316
PathogenBox_PlateA	D06	MMV688942	KINETOPLASTIDS	CC(C)(C)C(O)C(Oc1ccc(cc1)c2ccccc2)n3cncn3	#NAME?	Bitertanol	1	0	0	0.0909091	0.15	0.127273	105.563	45.9957
PathogenBox_PlateA	D07	MMV688554	TUBERCULOSIS	CNc1snc(C)c1C(=O)NCCOc2ccc(OC)cc2	#NAME?		1	0	0	0.0909091	0.15	0.127273	91.3206	11.4562
PathogenBox_PlateA	D08	MMV676555	TUBERCULOSIS	Cc1nnc(NCc2cccc(Cl)c2)c3ccccc13	#NAME?		0	0	0	0	0.25	0.127273	102.465	52.4956
PathogenBox_PlateA	D09	MMV676383	TUBERCULOSIS	CCC(Sc1oc2ccccc2n1)C(=O)Nc3nccs3	#NAME?		2	4	4	0.181818	1	1	7.05788	0.271453	1
PathogenBox_PlateA	D10	MMV676444	TUBERCULOSIS	O=C(NC1CCCCC1)N2CCN(Cc3ccc4OCOc4c3)CC2	#NAME?		0	0	0	0.0454545	0.2	0.127273	88.5566	19.601
PathogenBox_PlateA	D11	MMV676409	TUBERCULOSIS	Fc1cccc(OCC(=O)Nc2nc(cs2)c3ccccn3)c1	#NAME?		0	0	0	0.0909091	0.1	0.127273	68.0732	16.4145
PathogenBox_PlateA	E02	MMV688514	KINETOPLASTIDS	NC(=N)c1ccc(cc1)c2cc(on2)c3ccccc3	#NAME?		2	1	0	0.181818	0.65	0.454545	91.6165	7.187
PathogenBox_PlateA	E03	MMV676350	MALARIA	Cc1cnc(CCNC(=O)c2cc(cs2)c3ccc(Cl)cc3)[nH]1	#NAME?		1	1	0	0.136364	0.45	0.509091	79.6827	15.2145
PathogenBox_PlateA	E04	MMV553002	TUBERCULOSIS	CS(=O)(=O)CC1=Nc2ccccc2OC1=O	#NAME?		0	0	0	0.181818	0.45	0.454545	355.209	0.945435			1
PathogenBox_PlateA	E05	MMV688797	KINETOPLASTIDS	CC1CCCCN1C(=O)NCCc2coc(n2)c3ccc(F)cc3	#NAME?		1	0	0	0.0909091	0.25	0.236364	130.99	27.7008			1
PathogenBox_PlateA	E06	MMV688756	TUBERCULOSIS	CC(=O)NC[C@H]1CN(C(=O)O1)c2ccc(N3CCSCC3)c(F)c2	#NAME?	Sutezolid	0	0	0	0.136364	0.2	0.236364	144.716	48.9657			1
PathogenBox_PlateA	E07	MMV090930	TUBERCULOSIS	CCOC(=O)NC(=O)c1ccsc1NC(=O)c2nc3ccccc3s2	#NAME?		0	0	0	0.0909091	0.2	0.181818	133.545	15.0877			1
PathogenBox_PlateA	E08	MMV676431	TUBERCULOSIS	Cc1ccc(NC(=O)CC2COc3ccccc3O2)cc1Cl	#NAME?		0	0	0	0.136364	0.3	0.4	124.851	37.7808
PathogenBox_PlateA	E09	MMV676571	TUBERCULOSIS	COc1ccc(cc1OC)c2onc(n2)c3cccc(NC(=O)Cc4ccc(F)cc4)c3	#NAME?		0	0	1	0.181818	0.2	0.181818	137.388	68.5701			1
PathogenBox_PlateA	E10	MMV676445	TUBERCULOSIS	CCCn1c(CNc2ccccc2O)nc3ccccc13	#NAME?		0	0	0	0.136364	0.2	0.181818	337.326	50.0293			1
PathogenBox_PlateA	E11	MMV676589	TUBERCULOSIS	O=C(CCC1CCCCC1)Nc2cccc(c2)c3oc(nn3)c4occc4	#NAME?		2	4	4	0.181818	0.2	0.166667	144.945	4.11465			1	1
PathogenBox_PlateA	F02	MMV026020	MALARIA	CS(=O)(=O)c1cccc(c1)c2cnc3[nH]cc(c4ccc(CCC(=O)O)cc4)c3c2	#NAME?		0	0	0	0.227273	0.6	0.454545	86.9256	10.9327
PathogenBox_PlateA	F03	MMV688471	TOXOPLASMOSIS	CC(C(=O)Nc1ccc2oc(nc2c1)-c1ccncc1)c1ccccc1	#NAME?		1	0	0	0.181818	0.35	0.345455	89.8644	8.89457
PathogenBox_PlateA	F04	MMV676388	TUBERCULOSIS	COc1cccc(c1)n2nnnc2S(=O)(=O)Cc3ccccc3	#NAME?		4	4	4	1	1	1	-7.15087	7.46542	1
PathogenBox_PlateA	F05	MMV202553	KINETOPLASTIDS	CCC(=O)Nc1ccccc1C(=O)Nc2ccccn2	#NAME?		1	0	0	0.136364	0.3	0.236364	87.2858	17.6876
PathogenBox_PlateA	F06	MMV688936	TUBERCULOSIS	Clc1cccc2sc(nc12)N(CCCn3ccnc3)C(=O)c4occc4	#NAME?		0	0	0	0.0909091	0.4	0.4	46.4379	8.82532		1
PathogenBox_PlateA	F07	MMV676476	TUBERCULOSIS	CC1=C(CCC(=O)O)C(=O)Oc2c(C)c(OCc3cc(C)cc(C)c3)ccc12	#NAME?		1	1	0	0.136364	0.2	0.127273	79.2807	2.29758
PathogenBox_PlateA	F08	MMV676377	TUBERCULOSIS	Brc1c(nc2ncccn12)c3ccc4OCOc4c3	#NAME?		0	0	0	0.181818	0.2	0.127273	99.8896	42.6595
PathogenBox_PlateA	F09	MMV676406	TUBERCULOSIS	CC(C)n1ncc2c(cc(nc12)c3ccccc3)C(=O)NCC(N4CCOCC4)c5cccs5	#NAME?		2	0	1	0.272727	0.5	0.4	71.5512	31.7127
PathogenBox_PlateA	F10	MMV676461	TUBERCULOSIS	CCOC(=O)c1cc(on1)c2csc(Nc3c(C)cc(C)cc3C)n2	#NAME?		1	1	0	0.181818	0.3	0.290909	95.5705	7.75648
PathogenBox_PlateA	F11	MMV676509	TUBERCULOSIS	Cc1ccc2oc(nc2c1)c3cc(NC(=O)Cc4ccccc4)ccc3Cl	#NAME?		1	0	0	0.227273	0.25	0.236364	109.285	11.0806
PathogenBox_PlateA	G02	MMV688470	TOXOPLASMOSIS	CS(=O)(=O)N1CCC(CCn2nc(Cc3cccc4ccccc34)c3c(N)ncnc23)CC1	#NAME?		0	0	0	0.272727	0.45	0.509091	90.6814	13.9005
PathogenBox_PlateA	G03	MMV688704	TOXOPLASMOSIS	Cc1cc2nc(NC(=O)C(C)(C)C)nc(Cl)c2n1Cc1ccc(Cl)cc1	#NAME?		0	0	0	0.136364	0.4	0.345455	109.102	27.8979
PathogenBox_PlateA	G04	MMV188296	KINETOPLASTIDS	CNC(=O)C1Cc2ccccc2N1C(=O)Cc3ccc(F)cc3	#NAME?		0	0	0	0.227273	0.2	0.236364	84.2417	24.5479
PathogenBox_PlateA	G05	MMV688958	KINETOPLASTIDS	O=C(NCCc1csc(n1)c2ccccc2)c3ccccc3	#NAME?		1	0	0	0.136364	0.2	0.181818	86.7064	3.9262
PathogenBox_PlateA	G06	MMV063404	TUBERCULOSIS	Cc1nn(Cc2ccccc2)c(Cl)c1C(=O)NC3CCCCCC3	#NAME?		2	0	0	0.0454545	0.05	0.0727273	87.9316	1.80842
PathogenBox_PlateA	G07	MMV676558	TUBERCULOSIS	CC1=NN(C(=O)C1Cc2cccc3ccccc23)c4nc5ccccc5s4	#NAME?		0	0	0	0.0909091	0.1	0.127273	61.7839	10.8684					Hit rules applied
PathogenBox_PlateA	G08	MMV688555	TUBERCULOSIS	Clc1ccc(CN2CCN(CC2)C(=O)NCc3occc3)s1	#NAME?		0	0	0	0.136364	0.3	0.345455	93.5554	20.8109					U ≥2
PathogenBox_PlateA	G09	MMV676597	TUBERCULOSIS	CCCn1nnc(NC(=O)COc2ccc(cc2)C3CCCCC3)n1	#NAME?		0	0	0	0.136364	0.2	0.181818	89.6098	5.01879					S ≥ 0.5
PathogenBox_PlateA	G10	MMV676588	TUBERCULOSIS	Nc1c2CCCCc2nc3sc4CCCCc4c13	#NAME?		4	4	4	0.545455	0.8	0.563636	89.3792	6.79971					F ≤ 50
PathogenBox_PlateA	G11	MMV676554	TUBERCULOSIS	COc1ccc(Nc2ccccc2NC(=O)c3ccc(O)nc3)cc1	#NAME?		0	0	0	0.181818	0.45	0.4	176.208	13.4789			1
PathogenBox_PlateA	H02	MMV688350	DENGUE	COC(=O)c1ccc(F)cc1NS(=O)(=O)c2cccc(c2)c3cnn(Cc4ccccc4)c3	#NAME?		1	1	1	0.409091	0.45	0.454545	89.0716	18.4877
PathogenBox_PlateA	H03	MMV688360	KINETOPLASTIDS	COc1ccc(cc1OCc2ccccn2)C3=NN(C4CCCCCC4)C(=O)C3(C)C	#NAME?		1	0	0	0.272727	0.4	0.4	91.8094	25.2055
PathogenBox_PlateA	H04	MMV099637	KINETOPLASTIDS	Cc1nn2c(O)c3CCCCc3nc2c1c4ccc(F)cc4	#NAME?		0	0	0	0.409091	0.45	0.509091	113.447	32.5357
PathogenBox_PlateA	H05	MMV688798	KINETOPLASTIDS	CS(=O)(=O)c1ccccc1C(=O)N(Cc2ccccc2)c3ccccc3	#NAME?		0	1	0	0.181818	0.4	0.4	105.607	23.7917
PathogenBox_PlateA	H06	MMV676539	TUBERCULOSIS	O=C(NCCc1c[nH]c2ccccc12)C3=Cc4ccccc4OC3=O	#NAME?		1	0	0	0.181818	0.4	0.454545	91.2228	5.62579
PathogenBox_PlateA	H07	MMV202458	TUBERCULOSIS	COc1ccc(OC(C)C(=O)Nc2ccc(Cl)cc2C)cc1	#NAME?		0	0	0	0.181818	0.35	0.345455	97.184	23.7661
PathogenBox_PlateA	H08	MMV676474	TUBERCULOSIS	COc1ccccc1OCCCCn2c(nc3ccccc23)C4CC4	#NAME?		0	0	0	0.136364	0.2	0.181818	75.9515	11.8194
PathogenBox_PlateA	H09	MMV461553	TUBERCULOSIS	COC(=O)c1c2CCCCCc2sc1NC(=O)c3c(F)c(F)c(F)c(F)c3F	#NAME?		2	4	4	1	1	1	0.614913	1.87409	1
PathogenBox_PlateA	H10	MMV676520	TUBERCULOSIS	O=C(N1CCN(Cc2ccc3OCOc3c2)CC1)c4oc5ccccc5c4	#NAME?		0	0	0	0.181818	0.15	0.236364	109.527	17.3723
PathogenBox_PlateA	H11	MMV676512	TUBERCULOSIS	O=C(Nc1nc(cs1)c2ccccn2)c3cncn3c4ccccc4	#NAME?		0	0	0	0.0909091	0.15	0.236364	68.6615	5.01932
PathogenBox_PlateB	A02	MMV676480	ONCHOCERCIASIS	COC(=O)c1c2CCN(Cc3ccccc3)Cc2sc1NC(=O)C4=Cc5ccccc5OC4=O	#NAME?		0	3	2	0.4	0.222222	0.555556	76.2934	7.33371
PathogenBox_PlateB	A03	MMV652003	KINETOPLASTIDS	OB1OCc2ccc(NC(=O)c3ccccc3C(F)(F)F)cc12	#NAME?		0	0	0	0.1	0.0555556	0.166667	71.0842	6.5806
PathogenBox_PlateB	A04	MMV000062	REFERENCE	NC(=N)c1ccc(OCCCCCOc2ccc(cc2)C(=N)N)cc1	#NAME?	Pentamidine	0	0	0	0	0	0	81.8714	2.00088
PathogenBox_PlateB	A05	MMV006372	MALARIA	CN(C)CCNc1ncnc2c3cc(C)ccc3[nH]c12	#NAME?		1	0	1	0.25	0.222222	0.333333	72.5132	12.9956
PathogenBox_PlateB	A06	MMV688854	CRYPTOSPORIDIOSIS	CCOc1ccc2cc(ccc2c1)c3nn(CC4CCN(C)CC4)c5ncnc(N)c35	#NAME?		0	0	0	0.1	0.166667	0.388889	44.3307	2.3411		1
PathogenBox_PlateB	A07	MMV011903	MALARIA	Cc1ccc(NC(=O)c2nc[nH]c2C(=O)Nc3nc4ccccc4[nH]3)c(C)c1	#NAME?		3	4	4	0.272727	0.4	0.277778	50.7945	7.2353
PathogenBox_PlateB	A08	MMV020591	MALARIA	CC(C)C(NC(=O)Cc1cccc2ccccc12)C(=O)Nc3cccc(c3)C#N	#NAME?		0	0	0	0.15	0.222222	0.333333	68.7579	11.7472
PathogenBox_PlateB	A09	MMV020623	MALARIA	Cc1onc(C)c1C(=O)N2CCCC(C2)c3[nH]c4c(C)cccc4c3c5ccncc5	#NAME?		4	4	4	0.35	0.5	0.777778	67.5289	5.60749
PathogenBox_PlateB	A10	MMV020512	MALARIA	Cc1ccc(Oc2ccc(NC(=O)CNc3ccccc3N4CCCC4=O)cc2)cc1	#NAME?		2	2	0	0.2	0.333333	0.555556	77.0367	17.7969
PathogenBox_PlateB	A11	MMV688761	SCHISTOSOMIASIS	CS(=O)(=O)c1ccc(cc1[N+](=O)[O-])C(=O)N(CC2CCCO2)c3nc4ccccc4s3	#NAME?		4	4	4	1	1	1	-7.95694	2.49397	1
PathogenBox_PlateB	B02	MMV012074	TUBERCULOSIS	Cc1nc2ccccn2c1C(=O)NCc3ccc(Cl)cc3	#NAME?		0	0	0	0.1	0.189189	0.333333	80.9985	20.353
PathogenBox_PlateB	B03	MMV676604	KINETOPLASTIDS	CC(C)n1c(C)ncc1c2ccnc(Nc3ccc(cc3)S(=O)(=O)C)n2	#NAME?		0	0	0	0.15	0.135135	0.166667	66.9293	0.704667
PathogenBox_PlateB	B04	MMV002529	REFERENCE	O=C(C1CCCCC1)N2CC3N(CCc4ccccc34)C(=O)C2	#NAME?	Praziquantel	4	4	4	0.3	0.351351	0.555556	97.2915	7.00544
PathogenBox_PlateB	B05	MMV687776	LYMPHATIC FILARIASIS	Cc1cc(ccc1C(=O)NCc2ccc3B(O)OC(C)(C)c3c2)C4=NOC(C4)(c5cc(Cl)c(F)c(Cl)c5)C(F)(F)F	#NAME?		0	0	0	0.2	0.135135	0.166667	23.1541	4.86845		1
PathogenBox_PlateB	B06	MMV687800	REFERENCE	CC(C)N=C1C=C2N(c3ccc(Cl)cc3)c4ccccc4N=C2C=C1Nc5ccc(Cl)cc5	#NAME?	Clofazimine	4	4	4	1	1	1	16.5894	0.224074	1
PathogenBox_PlateB	B07	MMV020982	MALARIA	CC(C)(C)c1cc(cc(c1)C(=O)Nc2cccnc2)C(=O)Nc3cccnc3	#NAME?		0	0	0	0	0.0810811	0.0555556	79.8476	19.7409
PathogenBox_PlateB	B08	MMV020120	MALARIA	CC1CC1C(=O)NC2CCN(CC3(CCCCC3)c4ccccc4)CC2	#NAME?		1	0	0	0	0.0810811	0.222222	82.3831	5.91651
PathogenBox_PlateB	B09	MMV676605	MALARIA	C[C@@]1(O)C[C@@H](C1)c2nc(c3ccc4ccc(nc4c3)c5ccccc5)c6c(N)nccn26	#NAME?		0	0	0	0.05	0.027027	0.111111	63.9869	0.223069
PathogenBox_PlateB	B10	MMV007638	MALARIA	CCOc1ccc(cc1)c2nc(NC(=O)CS(=O)(=O)c3ccccc3)sc2C	#NAME?		0	0	1	0.1	0.0810811	0.111111	61.8325	2.82371
PathogenBox_PlateB	B11	MMV021057	MALARIA	CO\C=C(\C(=O)OC)/c1ccccc1Oc2cc(Oc3ccccc3C#N)ncn2	#NAME?	Azoxystrobin	0	0	0	0.05	0.027027	0.111111	79.48	1.81627
PathogenBox_PlateB	C02	MMV690027	KINETOPLASTIDS	COC1=C(OCCCCOC2=CC=C(C3=NNN=N3)C=C2)C=C(C([C@@H]4[C@H]5CC=CC4)=NN(C6CCCCCC6)C5=O)C=C1	#NAME?		2	0	0	0.35	0.567568	0.666667	31.0287	8.96586
PathogenBox_PlateB	C03	MMV676600	KINETOPLASTIDS	CO[C@@H](C(=O)N1Cc2[nH]nc(NC(=O)c3ccc(cc3)N4CCN(C)CC4)c2C1)c5ccccc5	#NAME?		0	0	0	0.15	0.243243	0.277778	97.4444	33.8902
PathogenBox_PlateB	C04	MMV676382	SCHISTOSOMIASIS	Cn1ncc2c(nc(NCCc3c[nH]c4ccccc34)nc12)N1CCOCC1	#NAME?		4	4	4	0.45	0.675676	0.944444	71.8503	11.1832
PathogenBox_PlateB	C05	MMV001625	REFERENCE	NCCCC(N)(C(F)F)C(=O)O	#NAME?	alpha-Difluoromethylornithine	0	0	0	0.15	0.135135	0.222222	87.0771	35.9134
PathogenBox_PlateB	C06	MMV001493	ONCHOCERCIASIS	COC(=O)C1=C(C)NC(=C(C1c2cccc3nonc23)C(=O)OC(C)C)C	#NAME?	Isradipine	2	0	0	0.15	0.189189	0.111111	63.2036	20.7221
PathogenBox_PlateB	C07	MMV020136	MALARIA	CNC(=O)c1cc(cs1)S(=O)(=O)N2CCN(CC2)c3ccccn3	#NAME?		0	0	0	0.1	0.135135	0.111111	73.4178	1.79761
PathogenBox_PlateB	C08	MMV020710	MALARIA	COc1ccc(Cl)cc1NC(=O)CN(C)C(=O)c2cnn(n2)c3ccccc3	#NAME?		0	0	0	0.2	0.351351	0.388889	78.3819	5.3359
PathogenBox_PlateB	C09	MMV020517	MALARIA	COc1ccccc1CNC(=O)c2cc(nc3c2cnn3C(C)C)C4CC4	#NAME?		0	0	0	0.2	0.459459	0.666667	38.3508	25.4732
PathogenBox_PlateB	C10	MMV019721	MALARIA	CCN(CC)S(=O)(=O)c1ccc(Cl)c(c1)C(=O)Nc2ccc3nc(C)sc3c2	#NAME?		1	0	0	0.05	0.027027	0.111111	87.8893	12.6878
PathogenBox_PlateB	C11	MMV688763	SCHISTOSOMIASIS	CNc1nnc(SC2=C(Cl)C(=O)N(N=C2)c3ccccc3)s1	#NAME?		4	4	4	1	1	1	-5.82868	4.92344	1
PathogenBox_PlateB	D02	MMV020537	MALARIA	Clc1ccc2OCCN(c3ccc(s3)C(=O)NC4CC4)c2c1	#NAME?		0	0	0	0.35	0.459459	0.5	83.4724	12.535
PathogenBox_PlateB	D03	MMV637953	REFERENCE	Cc1ccc(cc1NC(=O)c2cccc(NC(=O)Nc3cccc(c3)C(=O)Nc4cc(ccc4C)C(=O)Nc5ccc(c6cc(cc(c56)S(=O)(=O)O)S(=O)(=O)O)S(=O)(=O)O)c2)C(=O)Nc7ccc(c8cc(cc(c78)S(=O)(=O)O)S(=O)(=O)O)S(=O)(=O)O	#NAME?	Suramin	0	0	0	0.15	0.297297	0.388889	94.8301	9.59104
PathogenBox_PlateB	D04	MMV676536	SCHISTOSOMIASIS	COCC(C)NC(=O)CSc1ncnc2sc(cc12)-c1ccccc1	#NAME?		0	0	0	0.1	0.135135	0.111111	93.6397	36.1043
PathogenBox_PlateB	D05	MMV000063	REFERENCE	CCN(CC)CCCCCCNc1cc(OC)cc2c(C)ccnc12	#NAME?	Sitamaquine	0	0	0	0.1	0.135135	0.166667	59.2888	7.06096
PathogenBox_PlateB	D06	MMV689255	CRYPTOSPORIDIOSIS	Nc1ncnc2c1ncn2C[C@@H](O)[C@@H](O)C(=O)O	#NAME?	D-Eritadenine	0	0	0	0.1	0.189189	0.222222	63.7	5.4166
PathogenBox_PlateB	D07	MMV019838	MALARIA	FC(F)(F)c1cc(cc(c1)C(F)(F)F)C(=O)Nc2ccnc(n2)c3cccnc3	#NAME?		0	0	0	0.1	0.0810811	0.111111	90.9997	46.6839
PathogenBox_PlateB	D08	MMV020520	MALARIA	Cc1cc2ccccc2n1CC(=O)N3CC(Oc4ccccc34)C(=O)N5CCCCC5	#NAME?		0	1	0	0.05	0.027027	0.111111	71.4889	22.2832
PathogenBox_PlateB	D09	MMV019234	MALARIA	COc1ccc(cc1OC)C2CC(=NN2C(=O)c3occc3)c4cccs4	#NAME?		0	0	0	0.1	0.135135	0.166667	65.6629	7.8054
PathogenBox_PlateB	D10	MMV016136	MALARIA	Cc1cc(Nc2ccncc2)n3nc(C)c(c4ccccc4Cl)c3n1	#NAME?		0	0	0	0.1	0.135135	0.166667	64.9321	18.0376
PathogenBox_PlateB	D11	MMV688762	SCHISTOSOMIASIS	C1CCN(C1)C(c2ccccn2)c3c([nH]c4ccccc34)c5ccccc5	#NAME?		4	4	4	1	1	1	-3.39538	3.72194	1
PathogenBox_PlateB	E02	MMV676386	TUBERCULOSIS	Cc1cccc(Cn2ccc(NC(=O)c3ccc4OCOc4c3)n2)c1	#NAME?		0	0	0	0.0555556	0.125	0	93.173	17.6937
PathogenBox_PlateB	E03	MMV688773	REFERENCE	[O-][N+](=O)c1nccn1CC(=O)NCc2ccccc2	#NAME?	Benznidazole	0	0	0	0.15	0.243243	0.222222	89.2415	14.455
PathogenBox_PlateB	E04	MMV000011	REFERENCE	C[C@@H]1[C@H]2[C@H](O)[C@H]3[C@H](N(C)C)C(=C(C(=O)N)C(=O)[C@@]3(O)C(=C2C(=O)c4c(O)cccc14)O)O	#NAME?	Doxycycline	0	0	0	0.2	0.297297	0.222222	164.567	27.1122			1
PathogenBox_PlateB	E05	MMV687775	LYMPHATIC FILARIASIS	CC1(C)OB(O)c2ccc(cc12)C3=NOC(C3)(c4cc(Cl)c(F)c(Cl)c4)C(F)(F)F	#NAME?		2	0	1	1	1	1	33.4552	23.9178
PathogenBox_PlateB	E06	MMV002817	ONCHOCERCIASIS	Oc1c(I)cc(I)c2cccnc12	#NAME?	Iodoquinol	2	1	2	0.1	0.135135	0.333333	6.5826	2.8892
PathogenBox_PlateB	E07	MMV676442	MALARIA	CC(C)c1ncc(c2ccncc2)c(n1)[C@@H]3CC[C@@H](CNC(=O)c4cccnc4)CC3	#NAME?		0	0	0	0.05	0.0810811	0.111111	94.0363	30.2311
PathogenBox_PlateB	E08	MMV020152	MALARIA	Cc1onc(c1)C(=O)Nc2ccc(cc2)c3ccccc3	#NAME?		0	0	0	0.1	0.0810811	0.111111	90.7189	24.524
PathogenBox_PlateB	E09	MMV024397	MALARIA	O=C(NC1CC1)c2ccc(nc2)N3CCC(Cc4ccccc4)CC3	#NAME?		0	0	0	0.1	0.0810811	0.166667	91.0823	7.02582
PathogenBox_PlateB	E10	MMV019807	MALARIA	Cc1ccc2cc(C3NC(=O)c4ccccc4N3)c(Cl)nc2c1	#NAME?		0	0	1	0.05	0.0810811	0.111111	99.0373	7.2374
PathogenBox_PlateB	E11	MMV560185	MALARIA	C1CCN(CC1)c2cc(nc3ccccc23)c4ccccn4	#NAME?		1	0	1	0.15	0.243243	0.388889	59.8714	3.6774
PathogenBox_PlateB	F02	MMV019189	MALARIA	Cc1ccc2c(NC(=O)C23NN=C(S3)c4ccccc4)c1C	#NAME?		2	0	0	0	0.135135	0.222222	125.472	18.25
PathogenBox_PlateB	F03	MMV688774	REFERENCE	CC[C@@H]([C@H](C)O)N1N=CN(C1=O)c2ccc(cc2)N3CCN(CC3)c4ccc(OC[C@@H]5CO[C@](Cn6cncn6)(C5)c7ccc(F)cc7F)cc4	#NAME?	Posaconazole	3	4	4	0.2	0.243243	0.555556	88.8314	23.8786
PathogenBox_PlateB	F04	MMV003270	HOOKWORM	ClC1=CC(N=C(N)O2)=C2C=C1	#NAME?	Zoxazolamine	0	0	0	1	1	1	76.515	32.2929
PathogenBox_PlateB	F05	MMV637229	TRICHURIASIS	ClC1=CC=C([C@@](C)(C2=CC=CC=C2)OCCC3N(C)CCC3)C=C1	#NAME?	Clemastine	2	4	4	0.9	1	1	46.5916	30.3845	1
PathogenBox_PlateB	F06	MMV688853	CRYPTOSPORIDIOSIS	CCOc1ccc2cc(cnc2c1)c3nn(c(N)c3C(=O)N)C(C)(C)C	#NAME?		0	0	0	0.2	0.243243	0.388889	75.1909	3.28955
PathogenBox_PlateB	F07	MMV020321	MALARIA	COc1ccccc1C(C)NCC(=O)Nc2cc(ccc2Cl)C(F)(F)F	#NAME?		0	0	0	0.15	0.135135	0.277778	67.6887	16.6189
PathogenBox_PlateB	F08	MMV019087	MALARIA	Cc1cc(C)n2nc(nc2n1)C(=O)Nc3cc(ccc3N4CCOCC4)C(F)(F)F	#NAME?		0	0	0	0.05	0.135135	0.222222	73.3328	16.476
PathogenBox_PlateB	F09	MMV676528	MALARIA	CN(c1ccc(F)cc1)S(=O)(=O)c2ccc(Cl)c(c2)C(=O)Nc3cccc(C)n3	#NAME?		0	0	0	0.05	0.135135	0.222222	80.9638	3.76424
PathogenBox_PlateB	F10	MMV020320	MALARIA	Cc1oc(NC(=O)c2cn(nc2c3ccccc3C)c4ccccc4)nn1	#NAME?		1	1	1	0	0.0810811	0.111111	56.846	2.92256
PathogenBox_PlateB	F11	MMV085210	MALARIA	Clc1ccc(cc1)S(=O)(=O)NC(Cc2c[nH]c3ccccc23)C(=O)N4CCCCC4	#NAME?		0	0	0	0.05	0.0810811	0.111111	96.4045	6.88463
PathogenBox_PlateB	G02	MMV069458	TUBERCULOSIS	FC(F)(F)c1nnc2ccc(Cl)nn12	#NAME?		1	0	0	0.2	0.189189	0.333333	83.9524	9.29648
PathogenBox_PlateB	G03	MMV688991	REFERENCE	CC(=O)Oc1ccccc1C(=O)Nc2ncc(s2)[N+](=O)[O-]	#NAME?	Nitazoxanide	2	4	4	0.2	0.297297	0.555556	101.978	11.7198
PathogenBox_PlateB	G04	MMV687801	REFERENCE	CC[C@H](CO)NCCN[C@H](CC)CO	#NAME?	Ethambutol	0	0	0	0.15	0.135135	0.277778	78.3342	8.51471
PathogenBox_PlateB	G05	MMV689480	REFERENCE	O=C1C(CC2CCC(C(C)(C)C)CC2)=C(C(C3=C1C=CC=C3)=O)O	#NAME?	Buparvaquone	3	2	2	0.2	0.189189	0.277778	71.7227	13.4736
PathogenBox_PlateB	G06	MMV003152	REFERENCE	COC(=O)Nc1nc2cc(ccc2[nH]1)C(=O)c3ccccc3	#NAME?	Mebendazole	0	0	0	0.15	0.189189	0.277778	71.1162	6.81241
PathogenBox_PlateB	G07	MMV006239	MALARIA	Brc1ccc2NC(=O)C3(NCCc4c3[nH]c5ccccc45)c2c1	#NAME?		0	0	0	0.05	0.0810811	0.166667	109.095	19.1735
PathogenBox_PlateB	G08	MMV000858	MALARIA	Clc1ccc(cc1)S(=O)(=O)N2CCN(CC2)C(=S)NCc3occc3	#NAME?		1	0	0	0.05	0.0810811	0.111111	75.155	8.65813
PathogenBox_PlateB	G09	MMV006741	MALARIA	COc1cc2ncnc(NC3CCN(Cc4ccccc4)CC3)c2cc1OC	#NAME?		0	0	0	0.1	0.135135	0.0555556	86.5068	11.6032
PathogenBox_PlateB	G10	MMV688768	SCHISTOSOMIASIS	CN1CCN(CC1)C(c2cccs2)c3c(C)[nH]c4ccccc34	#NAME?		3	4	4	1	1	1	6.43398	3.25935	1
PathogenBox_PlateB	G11	MMV000023	REFERENCE	COc1cc(NC(C)CCCN)c2ncccc2c1	#NAME?	Primaquine	0	0	0	0	0.135135	0.333333	77.4071	0.475295
PathogenBox_PlateB	H02	MMV676602	KINETOPLASTIDS	CNC(=O)c1nn(C)c2c3nc(Nc4ccc(cc4)N5CCN(C)CC5)ncc3CC(C)(C)c12	#NAME?		3	4	4	0.363636	0.8	0.890909	156.512	11.4186			1	1
PathogenBox_PlateB	H03	MMV000014	REFERENCE	O[C@H]([C@H]1CCCCN1)c2cc(nc3c(cccc23)C(F)(F)F)C(F)(F)F	#NAME?	Mefloquine	4	4	4	0.954545	1	1	-0.138817	1.68344	1
PathogenBox_PlateB	H04	MMV687803	REFERENCE	CC(=O)NC[C@@H]1CN(C(=O)O1)c2ccc(N3CCOCC3)c(F)c2	#NAME?	Linezolid	0	0	0	0.227273	0.2	0.181818	94.2177	15.9394
PathogenBox_PlateB	H05	MMV668727	ONCHOCERCIASIS	Nc1ncc(cc1c2ccc(nc2)C(F)(F)F)c3ccc(nc3)C(F)(F)F	#NAME?		0	0	0	0.181818	0.15	0.127273	79.2514	7.14587
PathogenBox_PlateB	H06	MMV019742	MALARIA	Cc1ccc(cc1)S(=O)(=O)N2CCN(CC2)C(=O)c3cc([nH]n3)c4ccccc4	#NAME?		2	2	1	0.454545	0.75	0.836364	82.6076	7.83922
PathogenBox_PlateB	H07	MMV009054	MALARIA	Cc1onc(c1)C(=O)Nc2cnn(Cc3ccc(Cl)cc3Cl)c2	#NAME?		0	0	0	0.181818	0.1	0.127273	91.7399	6.67608
PathogenBox_PlateB	H08	MMV006901	MALARIA	CN(C)c1cc(NC(=O)Nc2ccccc2)c3ccccc3n1	#NAME?		1	0	0	0.181818	0.35	0.454545	-13.7369	12.2089		1
PathogenBox_PlateB	H09	MMV020391	MALARIA	CC(C)C(C(=O)Nc1ccc(cc1)S(=O)(=O)N(C)C)c2ccc(Cl)cc2	#NAME?		2	4	4	0.954545	0.85	1	29.4612	1.72985	1
PathogenBox_PlateB	H10	MMV676380	MALARIA	CC(=O)Nc1ccc(NC(=O)c2cc([nH]n2)c3cc(Cl)ccc3O)cc1	#NAME?		0	0	0	0.227273	0.15	0.127273	94.2362	12.2861
PathogenBox_PlateB	H11	MMV688994	REFERENCE	CNC1C(O)C(O)C(CO)OC1OC2C(OC3C(O)C(O)C(NC(=N)N)C(O)C3NC(=N)N)OC(C)C2(O)C=O	#NAME?	Streptomycin	0	0	0	0.181818	0.1	0.0727273	92.9728	5.65859
PathogenBox_PlateC	A02	MMV675997	KINETOPLASTIDS	Fc1ccc(cc1)N2CCN(CCCCN(CC#N)C(=O)OCc3ccccc3)CC2	#NAME?		0	0	0	0.0810811	0.111111	0.125	118.365	46.3871					Hit rules applied
PathogenBox_PlateC	A03	MMV676204	ONCHOCERCIASIS	Fc1ccc(cc1)C(=O)N(CCNc2ccccc2)c3ccccc3	#NAME?		1	0	1	0.135135	0.166667	0.25	126.166	3.37545					U ≥2
PathogenBox_PlateC	A04	MMV687239	TUBERCULOSIS	CC(C)(C(=O)Nc1ccc(F)cc1)n2cc(cn2)c3ccccc3F	#NAME?		0	0	0	0.135135	0.111111	0	128.318	37.9695					S ≥ 0.5
PathogenBox_PlateC	A05	MMV688122	TUBERCULOSIS	Cc1cccc(n1)c2nc(Nc3ccncn3)c4sccc4n2	#NAME?		1	3	4	0.405405	0.666667	0.75	39.9131	29.6609	1				F ≤ 50
PathogenBox_PlateC	A06	MMV688852	TOXOPLASMOSIS	CC(C)(C)n1nc(Cc2ccc(F)c(Cl)c2)c2c(N)ncnc12	#NAME?		0	0	0	0.0810811	0.166667	0.1875	98.679	33.634
PathogenBox_PlateC	A07	MMV687145	TUBERCULOSIS	CCCCS(=O)(=O)Nc1ccc2cnn(C)c2c1	#NAME?		0	0	0	0.0810811	0.111111	0.0625	140.975	38.7056			1
PathogenBox_PlateC	A08	MMV688327	TUBERCULOSIS	CC(=O)NCC1CN(C(=O)O1)c2ccc(c(F)c2)c3ccc(CNCc4cn[nH]n4)cc3	#NAME?	Radezolid	0	0	0	0.05	0.0555556	0	107.911	5.59383
PathogenBox_PlateC	A09	MMV008439	MALARIA	COc1ccc(CN2CCOc3ccc(cc3C2)C(C)(O)CN(C)C)cc1C	#NAME?		0	0	1	0.1	0.0555556	0	119.876	20.4298
PathogenBox_PlateC	A10	MMV595321	KINETOPLASTIDS	CC1=C(C)C(NC(N2N=C(C)C=C2NC(C3=CC=C(S(=O)(N(CC)CC)=O)C=C3)=O)=N1)=O	#NAME?		0	0	0	0.1	0	0	80.6157	17.5669
PathogenBox_PlateC	A11	MMV687747	TUBERCULOSIS	Cc1cc(OCC(=O)NCc2ccccc2)c3cc(Br)ccc3n1	#NAME?		0	0	0	0.1	0.0555556	0.0625	110.522	11.4074
PathogenBox_PlateC	B02	MMV020388	MALARIA	CC(Nc1cc(Cl)ccc1N2CCOCC2)C(=O)N3CCCC(C)C3	#NAME?		0	0	0	0.15	0.222222	0.375	137.267	42.9623			1
PathogenBox_PlateC	B03	MMV688547	KINETOPLASTIDS	COc1ccc(cc1c2cn(nn2)c3cccc(c3)C4=NCCN4)C5=NCCN5	#NAME?		0	0	0	0.1	0.111111	0.25	85.9012	21.887
PathogenBox_PlateC	B04	MMV688466	TUBERCULOSIS	Cn1ccnc1CNCCS(=O)(=O)c2cccc(Nc3ccc(cn3)c4cccc(F)c4)c2	#NAME?		0	0	0	0.1	0.0555556	0.125	113.656	32.9531
PathogenBox_PlateC	B05	MMV687749	TUBERCULOSIS	C([C@@H]1CN(CCN1)c2nccc(Oc3ccc(cc3)n4ccnc4)n2)c5ccccc5	#NAME?		0	0	0	0.1	0.111111	0.1875	94.4327	8.29686
PathogenBox_PlateC	B06	MMV688846	TUBERCULOSIS	Cc1ccccc1CN2CCC(O)(CC2)c3ccc(Cl)c(c3)C(F)(F)F	#NAME?		2	0	1	0.1	0.0555556	0.1875	71.0864	3.62417
PathogenBox_PlateC	B07	MMV054312	TUBERCULOSIS	CC(=O)N1CCc2cc3nc(C)cc(C)c3cc12	#NAME?		0	0	0	0.2	0.111111	0.0625	111.762	15.6402
PathogenBox_PlateC	B08	MMV689060	KINETOPLASTIDS	Clc1ccc(CN2CCN(CC2)C3=NCCN3)cc1Cl	#NAME?		1	0	0	0.1	0.0555556	0.125	81.8942	11.8179
PathogenBox_PlateC	B09	MMV689061	KINETOPLASTIDS	CC1=C(F)C=CC=C1CN2CCCC(CC3=NC(C4=CC=C(NC(C)=O)C=C4)=NO3)C2	#NAME?		0	0	0	0.1	0.0555556	0.1875	117.382	1.49694
PathogenBox_PlateC	B10	MMV689028	KINETOPLASTIDS	O=C(N1CCN(CC2=CC=C(NS(=O)(C3=CC=C(C)C=C3)=O)C=C2)CC1)C4=CC(C#N)=CC=C4	#NAME?		0	1	1	0.05	0.0555556	0.0625	130.799	15.8238			1
PathogenBox_PlateC	B11	MMV688371	KINETOPLASTIDS	NCCN(C(=O)c1ccc(Cl)cc1Cl)c2ccc(OCc3ccc(Cl)cc3)cc2	#NAME?		0	0	0	0.4	0.333333	0.3125	22.7049	12.923		1
PathogenBox_PlateC	C02	MMV688508	TUBERCULOSIS	CC(=O)NCC1CN(C(=O)O1)c2ccc(c(F)c2)c3ccc(CO)cc3	#NAME?		0	1	0	0.1	0.111111	0.0625	137.652	19.1108			1
PathogenBox_PlateC	C03	MMV688283	KINETOPLASTIDS	CN1CCN(CC1)S(=O)(=O)c2ccc(cc2)c3ccc4c(Nc5ncc(Cl)cn5)ccnc4c3	#NAME?		2	4	4	0.6	0.611111	0.625	32.4102	3.95945	1
PathogenBox_PlateC	C04	MMV687243	TUBERCULOSIS	NC(=O)c1cc(Br)ccc1OCCOc2ccccc2	#NAME?		1	1	2	0	0	0	110.146	32.3257
PathogenBox_PlateC	C05	MMV687730	TUBERCULOSIS	CCCCOC(=O)Nc1cc2nc([nH]c2cc1N3CCCC3)C4CCCCC4	#NAME?		3	4	4	0.15	0.388889	0.5625	131.619	5.51504			1	1
PathogenBox_PlateC	C06	MMV687251	TUBERCULOSIS	CN1C(=O)N(C)c2nsc(c2C1=O)S(=O)(=O)C	#NAME?		4	4	4	1	1	1	-0.448452	3.38946	1
PathogenBox_PlateC	C07	MMV687254	TUBERCULOSIS	CCCCc1ccc(nc1)C(=O)Nc2nccc3ccccc23	#NAME?		1	0	1	0.1	0.166667	0.1875	94.2269	30.9511
PathogenBox_PlateC	C08	MMV688509	TOXOPLASMOSIS	Fc1ccc(cc1)-c1[nH]c(cc1-c1ccncc1)C1CCN(CC1)C(=O)OCc1ccccc1	#NAME?		0	0	0	0.1	0.222222	0.1875	124.178	29.2297
PathogenBox_PlateC	C09	MMV688361	KINETOPLASTIDS	C1CN=C(N1)c2ccc(cc2)c3cc(on3)c4cccc(c4)C5=NCCN5	#NAME?		0	0	0	0.1	0.111111	0.125	115	69.0014
PathogenBox_PlateC	C10	MMV689029	KINETOPLASTIDS	O=C(N1CCN(CC2=CC=C(NS(=O)(C3=CC=C(OC)C=C3)=O)C=C2)CC1)C4=CC(C#N)=CC=C4	#NAME?		0	0	1	0.1	0.111111	0.1875	143.621	31.0661			1
PathogenBox_PlateC	C11	MMV022236	MALARIA	CCN(CC)CCCN1CCN(CC1)C(=O)c2cccc(c2)c3noc(n3)C(F)(F)F	#NAME?		0	0	1	0.2	0.111111	0.25	97.3106	4.07446
PathogenBox_PlateC	D02	MMV688410	KINETOPLASTIDS	CN(C)CC(=O)NCCN1C(c2ccccc2)c3cc(Cl)ccc3N=C1C	#NAME?		0	0	0	0.35	0.333333	0.375	112.917	18.8606
PathogenBox_PlateC	D03	MMV676048	KINETOPLASTIDS	Clc1ccc(Cl)c(CO[C@H]2CCCC[C@@H]2n3ccnc3)c1	#NAME?		0	0	0	0.2	0.166667	0.25	109.128	36.3064
PathogenBox_PlateC	D04	MMV687703	TUBERCULOSIS	COc1cccc(n1)c2nc3c(cccc3n2CC4CCCN4)N5CCCC5	#NAME?		4	4	4	0.35	0.777778	0.75	158.278	48.9159			1	1
PathogenBox_PlateC	D05	MMV687248	TUBERCULOSIS	Nc1nc2ccc(cc2[nH]1)c3cncc(Oc4ccc(F)cc4)c3	#NAME?		2	1	1	0.3	0.555556	0.6875	110.725	25.7555
PathogenBox_PlateC	D06	MMV688125	TUBERCULOSIS	CCCc1ccc(cc1)S(=O)(=O)Nc2ccc(CN3CCN(CC4CC4)CC3)cc2	#NAME?		0	0	0	0.15	0.166667	0.375	108.042	29.711
PathogenBox_PlateC	D07	MMV687188	TUBERCULOSIS	COc1ccc2nc(C)cc(OCC(=O)Nc3ccccc3OC)c2c1	#NAME?		0	0	0	0.2	0.277778	0.25	107.726	29.9876
PathogenBox_PlateC	D08	MMV690103	KINETOPLASTIDS	C[C@@H](N(C)c1ncc2c(N)nc(N)nc2n1)c3ccc4CCCCc4c3	#NAME?		0	0	0	0.2	0.277778	0.4375	39.0529	20.5632		1
PathogenBox_PlateC	D09	MMV688124	TUBERCULOSIS	CCc1ccc(cc1)S(=O)(=O)Nc2cc(CN3CCN(CCC(C)C)CC3)ccc2C	#NAME?		1	2	4	0.25	0.444444	0.5	85.7882	13.2361
PathogenBox_PlateC	D10	MMV688845	TUBERCULOSIS	O=C(Nc1ccccc1N2CCOCC2)[C@@H](Cc3ccccc3)NC(=O)c4cccs4	#NAME?		0	0	0	0.2	0.166667	0.1875	128.93	2.88145
PathogenBox_PlateC	D11	MMV1030799	MALARIA	CCCn1c(NC(=O)c2ccc3ccccc3n2)nc4ccccc14	#NAME?		1	0	0	0.2	0.277778	0.3125	5.67624	6.29088		1
PathogenBox_PlateC	E02	MMV675994	CRYPTOSPORIDIOSIS	Clc1ccc(cc1)n2cc(COc3ccnc4ccccc34)nn2	#NAME?		0	0	0	0.105263	0.388889	0.3125	103.019	24.0062
PathogenBox_PlateC	E03	MMV676057	KINETOPLASTIDS	CC(C)(C)OC(=O)N1CCN(CC1)c2cc(n[nH]2)c3ccc(Oc4ccccc4)cc3	#NAME?		0	0	0	0.0526316	0.166667	0.25	66.0621	16.468
PathogenBox_PlateC	E04	MMV687699	TUBERCULOSIS	FC(F)(F)c1nc2ccccn2c1C(=O)NCc3cc(Cl)cc(Cl)c3	#NAME?		0	1	0	0.157895	0.333333	0.3125	93.7194	26.078
PathogenBox_PlateC	E05	MMV687146	TUBERCULOSIS	Cc1cc(C)c2cc([nH]c2c1)C(=O)NC3CCCCCCC3	#NAME?		0	1	0	0.315789	0.333333	0.4375	123.95	42.4523
PathogenBox_PlateC	E06	MMV687696	TUBERCULOSIS	CCc1nc2ccc(Cl)cn2c1C(=O)NCc3ccc(cc3)N4CCC(CC4)c5ccc(OC(F)(F)F)cc5	#NAME?		1	0	0	0.105263	0.0555556	0	66.8257	3.8251
PathogenBox_PlateC	E07	MMV687170	TUBERCULOSIS	COc1ccc(Cn2cnc3c(nc(Cl)nc23)c4occc4)cc1	#NAME?		0	0	0	0.105263	0.0555556	0.125	98.6017	15.2768
PathogenBox_PlateC	E08	MMV690102	KINETOPLASTIDS	COc1ccc(Oc2ccc(cc2)[C@@H](C)N(C)c3ncc4c(N)nc(N)nc4n3)cc1	#NAME?		4	4	4	0.526316	0.5	0.5	4.73538	1.18179	1
PathogenBox_PlateC	E09	MMV689709	KINETOPLASTIDS	O=C(N1CC(C2=CC(NC)=CC(C)=N2)OCC1)C3=NNC4=C3C=CC=C4	#NAME?		0	0	0	0.157895	0.166667	0.125	123.493	76.1344
PathogenBox_PlateC	E10	MMV021375	MALARIA	CC(C)CNc1cc(nc2c([nH]nc12)-c1ccccc1)C	#NAME?		0	0	0	0.105263	0.111111	0.0625	92.7068	5.52636
PathogenBox_PlateC	E11	MMV1029203	MALARIA	CNC(=O)CNc1nc(nc2scc(c3ccccc3)c12)c4ccccn4	#NAME?		0	0	0	0.105263	0.111111	0.125	89.9902	26.947
PathogenBox_PlateC	F02	MMV676053	CRYPTOSPORIDIOSIS	COc1cc(NC(=O)CC2=NN(C)C(=O)c3ccccc23)ccc1Cl	#NAME?		0	0	0	0.105263	0.111111	0.0625	104.061	15.4853
PathogenBox_PlateC	F03	MMV688179	KINETOPLASTIDS	NC(=N)Nc1ccc(c(Cl)c1)c2oc(cc2)c3ccc(NC(=N)N)cc3Cl	#NAME?		0	0	0	0.0526316	0.111111	0.125	61.6841	10.2229
PathogenBox_PlateC	F04	MMV023969	TUBERCULOSIS	C(Nc1cccnc1)c2ccc(s2)c3cc4ccncc4cc3OC5CCNCC5	#NAME?		3	3	4	0.136364	0.45	0.555556	14.8115	8.36742	1
PathogenBox_PlateC	F05	MMV687138	TUBERCULOSIS	NC(=O)c1cc(ccc1OCCOc2ccccc2)c3ccsc3	#NAME?		0	0	0	0.157895	0.111111	0	89.537	0.650561
PathogenBox_PlateC	F06	MMV688262	TUBERCULOSIS	CC1(COc2ccc(cc2)N3CCC(CC3)Oc4ccc(OC(F)(F)F)cc4)Cn5cc(nc5O1)N(=O)=O	#NAME?	Delamanid	0	0	0	0.157895	0.111111	0.0625	110.477	20.5074
PathogenBox_PlateC	F07	MMV687189	TUBERCULOSIS	COc1ccc2nc(C)cc(OCC(=O)NCc3ccccc3)c2c1	#NAME?		0	0	0	0.0526316	0.0555556	0	74.7405	9.71676
PathogenBox_PlateC	F08	MMV687807	TUBERCULOSIS	Oc1ccc(Cl)cc1C(=O)Nc2ccc(c(c2)C(F)(F)F)C(F)(F)F	#NAME?		4	4	4	1	1	1	35.4318	3.78174	1
PathogenBox_PlateC	F09	MMV676478	TUBERCULOSIS	O=C(C1CCN(CC1)c2nnc(s2)n3cccc3)N4CCC(Cc5ccccc5)CC4	#NAME?		1	1	0	0.0526316	0.111111	0	103.434	25.7238
PathogenBox_PlateC	F10	MMV062221	MALARIA	Cc1cc(C)nc(n1)n2nc(C)cc2Nc3ccccc3	#NAME?		2	1	4	0.0526316	0.277778	0.25	55.5551	7.87862
PathogenBox_PlateC	F11	MMV688921	DENGUE	OC[C@H]1O[C@H](C(O)[C@H]1O)n2c3ccc(Cl)cc3c4c(ncnc24)c5oc6ccccc6c5	#NAME?		0	0	0	0.157895	0.111111	0	93.8719	9.84828
PathogenBox_PlateC	G02	MMV676191	CRYPTOSPORIDIOSIS	CC(C)C(Oc1cccc2ccccc12)C(=O)O	#NAME?		0	0	0	0	0	0.0555556	107.724	2.88381
PathogenBox_PlateC	G03	MMV675993	CRYPTOSPORIDIOSIS	COc1ccc(cc1OC)c2nn(C(C)C)c3ncnc(N)c23	#NAME?		0	0	0	0.05	0.0555556	0.0555556	95.2445	24.26
PathogenBox_PlateC	G04	MMV021660	TUBERCULOSIS	Cc1cc(NCCc2ccccc2)nc(NC(=N)Nc3ccc(Cl)cc3)n1	#NAME?		4	4	4	1	1	1	8.49962	0.0507279	1
PathogenBox_PlateC	G05	MMV688417	TOXOPLASMOSIS	CC(C)n1nc(-c2cc3c(Cl)cccc3[nH]2)c2c(N)ncnc12	#NAME?		4	4	4	0.55	0.666667	1	54.2605	25.0455
PathogenBox_PlateC	G06	MMV687273	TUBERCULOSIS	CC(=CCC\C(=C/CNCCNC1C2CC3CC(CC1C3)C2)\C)C	#NAME?		4	4	4	1	1	1	13.4938	10.231	1
PathogenBox_PlateC	G07	MMV687180	TUBERCULOSIS	CCc1ccc(cc1)[C@@H]2C[C@@H](n3ncc(C(=O)NCc4ccc(OC)cc4)c3N2)C(F)(F)F	#NAME?		1	1	0	0.1	0.111111	0.0555556	99.4589	0.674857
PathogenBox_PlateC	G08	MMV1088520	MALARIA	CC(C)N(Cc1ccccn1)Cc2csc(n2)c3oc(C)cc3	#NAME?		0	1	0	0.05	0.222222	0.388889	84.4011	18.3572
PathogenBox_PlateC	G09	MMV688891	TUBERCULOSIS	COc1cc(Br)cc2C=C(C(=O)Nc3cccc(c3)C(F)(F)F)C(=O)Oc12	#NAME?		0	0	0	0.1	0.0555556	0.0555556	90.5892	27.7941
PathogenBox_PlateC	G10	MMV023370	MALARIA	Nc1ncc(cc1c2nc3cc(Cl)cnc3[nH]2)c4cn[nH]c4	#NAME?		0	0	0	0	0	0.0555556	94.3923	1.91616
PathogenBox_PlateC	G11	MMV688703	TOXOPLASMOSIS	CN1CCC(CC1)c1cc(c([nH]1)-c1ccc(F)cc1)-c1ccncc1	#NAME?		0	0	0	0	0.0555556	0.111111	94.5561	2.87047
PathogenBox_PlateC	H02	MMV675969	ONCHOCERCIASIS	CC(C)(C)c1ccc(N[C@@H]2CCCC[C@H]2NC(=O)c3occc3)cc1	#NAME?		0	0	0	0	0	0.111111	117.357	21.0734
PathogenBox_PlateC	H03	MMV688313	SCHISTOSOMIASIS	COc1ccc(cc1OC)-c1nnc2ccc(cn12)-c1cccc(c1)C(C)C	#NAME?		0	2	0	0.1	0.166667	0.277778	14.6518	1.65451		1
PathogenBox_PlateC	H04	MMV687172	TUBERCULOSIS	O=C(C1CCN(CC1)c2cc(ncn2)n3cccc3)N4CCc5ccccc5C4	#NAME?		0	0	1	0.05	0.111111	0.333333	96.4487	3.92104
PathogenBox_PlateC	H05	MMV688844	TUBERCULOSIS	COc1ccc2nccc(NC(=O)C3CCN(CCc4ccc(Cl)cc4)CC3)c2n1	#NAME?		0	0	0	0.05	0.0555556	0.111111	77.2013	25.1057
PathogenBox_PlateC	H06	MMV1198433	SCHISTOSOMIASIS	CC(C)c1ccc(NC(=O)COC2=CC(=C(C#N)C(=O)N2C)C)cc1	#NAME?		0	0	0	0.1	0.0555556	0	82.3189	19.9094
PathogenBox_PlateC	H07	MMV024311	TUBERCULOSIS	Cc1ccc2[nH]c(C3CCCNC3)c(c4ccncc4)c2c1	#NAME?		0	0	0	0	0	0.111111	75.2113	5.32375					Hit rules applied
PathogenBox_PlateC	H08	MMV1019989	MALARIA	CCc1ccc(cc1)C(NCc2nc(N)nc(n2)N(C)C)C(C)C	#NAME?		0	0	0	0	-0.0555556	0.111111	99.2201	17.8845					U ≥2
PathogenBox_PlateC	H09	MMV1037162	MALARIA	CCNC(=O)C(C)Nc1nc(nc2sc(C)c(C)c12)c3cccnc3	#NAME?		0	0	0	0	0	0.111111	81.9243	20.0569					S ≥ 0.5
PathogenBox_PlateC	H10	MMV689437	KINETOPLASTIDS	CC(N(C)c1ncc2c(N)nc(N)nc2n1)c3cc(Cl)cc(Cl)c3	#NAME?		0	0	0	0	0	0.166667	42.1988	2.54048		1			F ≤ 50%
PathogenBox_PlateC	H11	MMV688955	TOXOPLASMOSIS	Cc1cc(NC(=O)c2ccc(Oc3ccc(Cl)cc3O)o2)no1	#NAME?		0	0	0	0.1	0	0.111111	99.634	8.37684
PathogenBox_PlateD	A02	MMV026468	MALARIA	OCc1ccc(cc1)c2cncc(Nc3cccc(Cl)c3)c2	#NAME?		0	0	0	0.1	0.0810811	0.151515	99.456	5.72401
PathogenBox_PlateD	A03	MMV020670	MALARIA	COc1ccc(cc1)c2cncc3ccc(nc23)C(=O)NCCCn4ccnc4	#NAME?		1	0	0	0	0.027027	0.030303	121.26	26.1367
PathogenBox_PlateD	A04	MMV023953	MALARIA	O=C(Nc1cccc(c1)c2ccc(NCCCN3CCCC3)nc2)c4ccccc4	#NAME?		1	2	4	0.2	0.459459	0.515152	67.7724	6.87456
PathogenBox_PlateD	A05	MMV010576	MALARIA	COc1cc(ccc1O)c2cc(cnc2N)c3ccc(cc3)S(=O)(=O)C	#NAME?		2	1	1	0.1	0.189189	0.151515	139.24	21.3895			1	1
PathogenBox_PlateD	A06	MMV032967	MALARIA	FC(F)(F)c1cccc(c1)c2nc3c(NCc4ccncc4)nccc3[nH]2	#NAME?		0	0	0	0.15	0.0810811	0.151515	90.7105	2.03203
PathogenBox_PlateD	A07	MMV031011	MALARIA	CNC(=O)C1Cc2c([nH]c3cc(Cl)ccc23)C4(CCN(CCc5ccccc5)CC4)N1	#NAME?		0	0	0	0.1	0.513514	0.393939	13.4401	6.40694		1
PathogenBox_PlateD	A08	MMV688178	SCHISTOSOMIASIS	O(c1ccccc1)c1ccc(cc1)-c1cncc(n1)-c1ccc2[nH]ccc2c1	#NAME?		0	0	2	0.6	1	1	3.06398	8.47624	1
PathogenBox_PlateD	A09	MMV688362	KINETOPLASTIDS	COc1cc(cc2cc(oc12)c3ccc(cc3)C4=NCCN4)C5=NCCN5	#NAME?		0	0	0	0.1	0.027027	0.030303	4.86462	8.96676		1
PathogenBox_PlateD	A10	MMV687706	KINETOPLASTIDS	C1CN(CCN1)c2cc(n[nH]2)c3ccc(Oc4ccccc4)cc3	#NAME?		2	2	2	0.05	0.15	0.444444	25.2207	1.36923
PathogenBox_PlateD	A11	MMV026356	MALARIA	CCn1ncc2c(NC3CCOCC3)c(CNC(=O)c4ccnn4C)c(C)nc12	#NAME?		0	0	0	0.05	0.0810811	0.030303	92.476	21.0623
PathogenBox_PlateD	B02	MMV011511	MALARIA	COc1ccc(CCN2CCC(CC2)NCc3cccc(c3)N(C)C)cc1	#NAME?		0	0	0	0	0.027027	0.030303	98.58	2.52076
PathogenBox_PlateD	B03	MMV007625	MALARIA	Cc1cc(C)n(n1)c2ccc(NC(=O)C3CCN(Cc4cnc(C)s4)CC3)cc2	#NAME?		0	0	0	0.1	0.135135	0.151515	135.062	51.635			1
PathogenBox_PlateD	B04	MMV007471	MALARIA	COc1cc(OC)cc(c1)C(=O)NCC2Cc3cc(Cl)cc(c3O2)c4ccncc4	#NAME?		0	0	0	0.1	0.189189	0.151515	152.802	43.4076			1
PathogenBox_PlateD	B05	MMV024829	MALARIA	CC(C)CN1CCC(CC1)N(C)c2cc(NC(=O)c3cccc(C)c3)ccn2	#NAME?		0	0	0	0.1	0.243243	0.212121	125.476	48.3301
PathogenBox_PlateD	B06	MMV045105	KINETOPLASTIDS	C1CN(CCO1)c2cc(n[nH]2)c3ccc(Oc4ccccc4)cc3	#NAME?		0	0	0	0.15	0.297297	0.151515	111.857	2.92972
PathogenBox_PlateD	B07	MMV022029	MALARIA	CN1CCC(CC1)NCc2cccc(c2)c3ccc(cc3)S(=O)(=O)NCc4ccccc4	#NAME?		0	2	4	0.6	0.783784	0.939394	19.2103	11.8336	1
PathogenBox_PlateD	B08	MMV676064	ONCHOCERCIASIS	CC(=O)N(CCN(C(=O)c1ccc(F)cc1)c2ccccc2)c3ccccc3	#NAME?		1	0	0	0.1	0.027027	0.0909091	116.719	5.87588
PathogenBox_PlateD	B09	MMV688180	KINETOPLASTIDS	Cc1nn(C)c(C)c1NS(=O)(=O)c2c(Cl)cc(cc2Cl)c3ccnc(c3)N4CCNCC4	#NAME?		0	0	0	0.15	0.0810811	0.151515	121.284	8.91461
PathogenBox_PlateD	B10	MMV024035	MALARIA	O=C(Nc1ccccc1)c2ccc(s2)c3cc4ccncc4cc3OC5CCNCC5	#NAME?		0	0	0	0.15	0.459459	0.454545	-18.0627	6.10545		1
PathogenBox_PlateD	B11	MMV688941	TUBERCULOSIS	COc1cc(CN2CCC3(CC2)C=Cc4ccccc34)cc5OCOc15	#NAME?		1	1	0	0.1	0.135135	0.272727	73.9107	18.2888
PathogenBox_PlateD	C02	MMV020291	MALARIA	CC(N1CCN(CC1)S(=O)(=O)c2ccc(cc2)C(C)(C)C)C(=O)N3CCCC3	#NAME?		1	0	0	0.05	0.027027	0.0909091	108.883	3.66826
PathogenBox_PlateD	C03	MMV006833	MALARIA	Cc1cc(Cl)c(cc1OCC(=O)NC2CCCCC2)S(=O)(=O)N3CCCC3	#NAME?		0	0	0	0.1	0.189189	0.212121	111.483	31.6154
PathogenBox_PlateD	C04	MMV026490	MALARIA	O=C(NCCc1ccccc1)c2cc(cnc2NCC3CC3)c4cccnc4	#NAME?		0	2	0	0.2	0.513514	0.575758	85.9169	#DIV/0!
PathogenBox_PlateD	C05	MMV687246	MALARIA	CN1CCN(CC1)S(=O)(=O)c2ccc(cc2)c3ccc4c(Nc5ccc6nn[nH]c6c5)ccnc4c3	#NAME?		0	0	0	0.1	0.135135	0.0909091	152.127	#DIV/0!			1
PathogenBox_PlateD	C06	MMV676162	KINETOPLASTIDS	OC(=O)c1cccc2oc(nc12)c3ccccc3NC(=O)c4ccccc4	#NAME?		0	0	0	0.05	0.027027	0.030303	54.1342	67.3741
PathogenBox_PlateD	C07	MMV024114	MALARIA	Cc1ccc(cc1)S(=O)(=O)n2cc(c3ccnc(N)c3)c4cc(Br)cnc24	#NAME?		2	3	3	0.45	0.567568	0.515152	4.54628	8.18063	1
PathogenBox_PlateD	C08	MMV688467	KINETOPLASTIDS	CCCCN(CCCC)c1c(cc(cc1C#N)S(=O)(=O)Nc2ccccc2)C#N	#NAME?		0	0	0	0.15	0.135135	0.272727	40.5287	61.0403		1
PathogenBox_PlateD	C09	MMV675998	KINETOPLASTIDS	COc1ccc(cc1c2cn(nn2)c3ccc(cc3)C(=N)N)C(=N)N	#NAME?		0	0	0	0.05	0.0810811	0.0909091	69.2767	31.554
PathogenBox_PlateD	C10	MMV659010	KINETOPLASTIDS	FC(F)(F)c1cc(NCCc2ccccc2)nc(n1)c3ccccn3	#NAME?		1	2	4	0.05	0.513514	0.393939	58.7115	3.11539
PathogenBox_PlateD	C11	MMV676008	KINETOPLASTIDS	OC(=O)c1cccc2oc(nc12)c3cccc(O)c3NC(=O)c4cc(on4)c5ccccc5	#NAME?		0	0	0	0.05	0.027027	0.030303	80.2468	5.89561
PathogenBox_PlateD	D02	MMV676269	MALARIA	C[C@@H](N1CCCC[C@H]1c2ccc(OCc3cccc(F)c3)cc2)C(=O)N	#NAME?		0	0	0	0.05	0.0810811	0.212121	117.653	1.17467
PathogenBox_PlateD	D03	MMV020081	MALARIA	COc1cccc(CC(=O)N2CCC(CC2)n3c(C)nc4ccc(F)cc34)c1	#NAME?		1	1	1	0.1	0.405405	0.393939	115.832	17.6065
PathogenBox_PlateD	D04	MMV026550	MALARIA	CC(C)(C)CN1C(=NC(C1=O)(c2ccccc2)c3ccccc3)N	#NAME?		0	0	0	0.1	0.135135	0.272727	88.6378	88.1502
PathogenBox_PlateD	D05	MMV675995	ONCHOCERCIASIS	COc1ccc(cc1)N(CCc2cccc(C)n2)C(=O)C	#NAME?		1	1	0	0.15	0.135135	0.0909091	114.274	26.8495
PathogenBox_PlateD	D06	MMV688274	KINETOPLASTIDS	Fc1cccc(COc2ccc(Nc3ncnc4ccc(NC(=O)CN5CCOCC5)cc34)cc2Cl)c1	#NAME?		0	0	0	0.3	0.25	0.222222	124.787	23.3768
PathogenBox_PlateD	D07	MMV023860	MALARIA	NS(=O)(=O)c1cccc(c1)c2ccc3ncc(nc3c2)N4CCOCC4	#NAME?		0	0	0	0.15	0.189189	0.454545	116.496	2.81165
PathogenBox_PlateD	D08	MMV688407	KINETOPLASTIDS	COc1cc(ccc1c2cn(nn2)c3cccc(c3)C4=NCCN4)C5=NCCN5	#NAME?		1	0	0	0.25	0.297297	0.393939	72.8203	27.8521
PathogenBox_PlateD	D09	MMV023949	MALARIA	CC(C)(C)c1cc(C(=O)N2CCN(CC2)c3nccnc3C#N)n(Cc4ccccc4)n1	#NAME?		0	0	1	0	0.027027	0.030303	119.881	11.6919
PathogenBox_PlateD	D10	MMV676050	CRYPTOSPORIDIOSIS	CS(=O)(=O)N1CCC(Cn2nc(Cc3cccc4ccccc34)c5c(N)ncnc25)CC1	#NAME?		0	0	0	0.1	0.567568	0.636364	122.409	0.938696
PathogenBox_PlateD	D11	MMV024406	MALARIA	Clc1cccc(NC(=O)c2cnc(N3CCN(CC3)c4ccncc4)c(Cl)c2)c1	#NAME?		2	4	4	0.8	0.945946	1	3.66635	3.9982	1
PathogenBox_PlateD	E02	MMV023233	MALARIA	Nc1nccc2ccc(cc12)c3ccc4nccn4c3	#NAME?		4	4	4	0.567568	0.777778	0.75	41.053	19.453	1
PathogenBox_PlateD	E03	MMV085230	MALARIA	CCCNC(=O)N1CCC2(CC1)CC(=O)c3cc(C)ccc3O2	#NAME?		0	0	0	0.1	0.15	0.111111	101.769	25.054
PathogenBox_PlateD	E04	MMV085071	MALARIA	COc1cncc(c1)c2cncc(n2)N3CCN(CC3)c4ccncc4	#NAME?		1	0	0	0.351351	0.388889	0.6875	103.016	1.19065
PathogenBox_PlateD	E05	MMV659004	KINETOPLASTIDS	Cc1nc(nc(N2CCC(Cc3ccccc3)C2)c1Cl)c4ccccn4	#NAME?		0	0	0	0.15	0.1	0.333333	-3.4583	1.94361		1
PathogenBox_PlateD	E06	MMV676260	MALARIA	CN1CCN(CC1)c2nccc3nc([nH]c23)c4ccc(F)c(F)c4	#NAME?		0	0	0	0	0.1	0.166667	109.929	9.25793
PathogenBox_PlateD	E07	MMV688364	TOXOPLASMOSIS	CC(C)(C)OC(=O)N1CCC(Cn2nc(-c3cnc4ccccc4c3)c3c(N)ncnc23)CC1	#NAME?		1	4	4	0.405405	0.444444	0.6875	84.7535	2.49262
PathogenBox_PlateD	E08	MMV032995	MALARIA	FC(F)(F)c1ccc(CN2C(=O)COCc3ccc(Br)cc23)cc1	#NAME?		0	0	0	0.297297	0.388889	0.4375	99.5485	31.3916
PathogenBox_PlateD	E09	MMV688279	KINETOPLASTIDS	CC1=Nc2ccc(Cl)cc2C(O)(N1CCN3CCCCC3)c4ccc(C)cc4	#NAME?		0	0	0	0	0.1875	0.375	-4.23092	1.66945		1
PathogenBox_PlateD	E10	MMV688271	KINETOPLASTIDS	NC(=N)Nc1ccc(cc1Cl)c2oc(cc2)c3ccc(N=C(N)N)c(Cl)c3	#NAME?		0	0	0	0	0	0.0625	89.7247	11.1145
PathogenBox_PlateD	E11	MMV019790	MALARIA	CCOc1ccccc1C(=O)Nc2cccc(c2)c3nc4ncccn4c3C	#NAME?		0	0	0	0.0810811	0.388889	0.625	106.774	2.91622
PathogenBox_PlateD	F02	MMV009135	MALARIA	O=C(C1CCN(CC1)c2nnnn2c3ccccc3)N4CCc5ccccc5C4	#NAME?		0	0	0	0.135135	0.111111	0.25	116.811	15.4034
PathogenBox_PlateD	F03	MMV011765	MALARIA	FC(F)(F)c1cnc(Sc2oc(nn2)c3ccncc3)c(Cl)c1	#NAME?		0	1	2	0.459459	0.777778	0.9375	73.9805	8.57695
PathogenBox_PlateD	F04	MMV024937	MALARIA	FC(F)(F)c1nc(oc1C(=O)Nc2ccc(nc2)N3CCNCC3)c4ccccc4	#NAME?		0	0	0	0.0810811	0.388889	0.625	69.6748	10.4247
PathogenBox_PlateD	F05	MMV085499	MALARIA	NC(=O)c1ccc(cc1)c2nc(cnc2N)c3ccc(cc3)C#N	#NAME?		2	2	4	0.027027	0.333333	0.5	113.238	9.63903
PathogenBox_PlateD	F06	MMV023985	MALARIA	COc1ccc(cc1OC)c2cnc3ccc(nn23)N4CCCC4	#NAME?		2	4	4	0.783784	0.944444	1	60.4687	12.4209
PathogenBox_PlateD	F07	MMV024195	MALARIA	CN(C)CCNC(=O)N1CCCN(CC1)c2ncnc3cc(sc23)c4ccccc4	#NAME?		0	0	0	-0.05	0.2	0.555556	105.867	8.12675
PathogenBox_PlateD	F08	MMV676063	ONCHOCERCIASIS	CCCCc1ccc(NC(=O)Nc2ccc(O[C@H]3CCCC[C@@H]3N(C)c4ccccc4)c(F)c2)cc1	#NAME?		0	0	0	0.111111	0.3125	0.875	33.6914	4.12267
PathogenBox_PlateD	F09	MMV676186	KINETOPLASTIDS	COC(=O)c1cccc2oc(nc12)c3cccc(OC)c3NC(=O)c4cc(on4)c5ccccc5	#NAME?		0	0	0	0.351351	0.333333	0.3125	88.0951	6.74132
PathogenBox_PlateD	F10	MMV688474	KINETOPLASTIDS	COc1cc(ccc1n2cc(nn2)c3cccc(c3)C4=NCCN4)C5=NCCN5	#NAME?		1	0	0	0.243243	0.277778	0.5	77.1914	3.21166
PathogenBox_PlateD	F11	MMV687812	TUBERCULOSIS	CN1CCN(CCCOc2ncc(Nc3ncc(nc3C(=O)N)c4ccc(c(F)c4)C(F)(F)F)cn2)CC1	#NAME?		3	3	3	1	1	1	5.19952	11.5684	1
PathogenBox_PlateD	G02	MMV007803	MALARIA	Clc1ccccc1CSCc2oc(cc2)C(=O)NC3CC3	#NAME?		1	0	1	0.405405	0.444444	0.5625	113.885	21.7096
PathogenBox_PlateD	G03	MMV001059	MALARIA	CCCS(=O)(=O)N1CCC(CO)(Cc2ccccc2C(F)(F)F)CC1	#NAME?		2	4	4	0.243243	0.277778	0.75	95.7091	16.2181
PathogenBox_PlateD	G04	MMV011691	MALARIA	NCC(=O)N1CCn2c(C1)nc(c2Nc3ccc4OCOc4c3)c5ccccc5	#NAME?		0	0	2	0.297297	0.444444	0.6875	128.576	28.4961
PathogenBox_PlateD	G05	MMV676877	MALARIA	OCCNc1ccc(cc1)C(=O)C2C[C@H]2c3ccc(Cl)cc3	#NAME?		0	0	0	0.135135	0.277778	0.625	93.3079	5.70532
PathogenBox_PlateD	G06	MMV663250	MALARIA	Clc1cccc(c1)C(c2ccc(CN3CCNCC3)cc2)n4ccnc4	#NAME?		1	1	4	0.405405	0.666667	0.875	76.1108	3.74336
PathogenBox_PlateD	G07	MMV407539	WOLBACHIA LF	CCc1nc2ccc(cn2c1N(C)Cc3cccs3)C(=O)NCc4ccc5OCOc5c4	#NAME?		0	0	0	-0.05	0.1	0.166667	139.866	15.3751			1
PathogenBox_PlateD	G08	MMV688372	KINETOPLASTIDS	FC1=C(C=C(NC(=O)N2CCCC2)C=C1)C1=NC2=CC(=CN=C2N1)C1=CC=CC=C1	#NAME?		0	4	4	0.675676	0.666667	0.875	111.108	0.627624
PathogenBox_PlateD	G09	MMV658993	KINETOPLASTIDS	Cc1nc(nc(NCCc2ccc(cc2)S(=O)(=O)C)c1Cl)c3ccccn3	#NAME?		0	4	4	0.135135	0.166667	0.5	66.9203	16.275					Hit rules applied
PathogenBox_PlateD	G10	MMV676182	CRYPTOSPORIDIOSIS	Nc1ncnc2c1c(Cc3cccc4ccccc34)nn2CC5CCNCC5	#NAME?		0	0	0	0	-0.0625	0	96.1618	6.79479					U ≥2
PathogenBox_PlateD	G11	MMV676411	TUBERCULOSIS	CC(Oc1ccccc1)C(=O)Nc2nc(cs2)c3ccccn3	#NAME?		2	0	4	0.297297	0.5	0.625	59.3731	6.5733					S ≥ 0.5
PathogenBox_PlateD	H02	MMV007133	MALARIA	CC(C)N(Cc1ccccc1)S(=O)(=O)c2ccc(cc2)C(=O)Nc3cc(C)on3	#NAME?		1	0	0	0.135135	0.444444	0.25	106.371	2.17601					F ≤ 50%
PathogenBox_PlateD	H03	MMV022478	MALARIA	Clc1cccc(c1)c2cnn3ccc(nc23)C(=O)Nc4ccc(cc4)N5CCNCC5	#NAME?		2	4	4	0.72973	0.777778	0.9375	7.6983	8.71804	1
PathogenBox_PlateD	H04	MMV024101	MALARIA	NS(=O)(=O)c1cncc(c1)c2ccc3nccc(c4cn[nH]c4)c3n2	#NAME?		0	0	0	0.135135	0.111111	0.3125	98.3842	9.11915
PathogenBox_PlateD	H05	MMV676881	MALARIA	CCn1cnc2c(Nc3cc(F)cc(F)c3)nc(nc12)C#N	#NAME?		4	4	4	0.351351	0.888889	0.75	97.6567	22.8281
PathogenBox_PlateD	H06	MMV024443	MALARIA	CN(C(=O)c1cc2c(cccc2[nH]1)c3cncnc3)c4ccccc4	#NAME?		0	0	0	0.189189	0.277778	0.375	101.937	2.22648
PathogenBox_PlateD	H07	MMV688469	TOXOPLASMOSIS	Nc1ncnc2[nH]nc(Cc3cccc4ccccc34)c12	#NAME?		1	2	3	0.243243	0.333333	0.5625	94.1266	19.5669
PathogenBox_PlateD	H08	MMV023388	MALARIA	FC(F)(F)c1cccc(c1)C(=O)NC2CCN(C2)c3ccnc4ccccc34	#NAME?		0	0	0	0.135135	0.555556	0.9375	103.301	5.92387
PathogenBox_PlateD	H09	MMV675968	CRYPTOSPORIDIOSIS	COc1ccc(OC)c(NCc2ccc3nc(N)nc(N)c3c2Cl)c1	#NAME?		0	2	0	0	0.05	0.277778	108.879	19.0503
PathogenBox_PlateD	H10	MMV675996	ONCHOCERCIASIS	COc1ccc(cc1)N(CCc2cccc(C)n2)C(=O)C3CCCCC3	#NAME?		0	2	1	0.15	0.2	0.111111	88.6742	31.5645
PathogenBox_PlateD	H11	MMV688980	MALARIA	CCC1=CC(=O)N(C)C(=N1)SC(C)C(=O)Nc2ccc(F)cc2	#NAME?		0	0	1	0.135135	0.111111	0	115.434	2.94674
PathogenBox_PlateE	A02	MMV011229	MALARIA	CC1=NC2=NC=CN2C(NC3=CC=C(C(F)(F)F)C=C3)=C1	#NAME?		0	0	0	0.0909091	0.15	0.157895	71.7278	5.51198
PathogenBox_PlateE	A03	MMV676468	TUBERCULOSIS	NC(CC(=O)c1ccc(Cl)cc1Cl)C(Cl)(Cl)Cl	#NAME?		0	0	0	0.0454545	0.1	0.157895	69.239	1.95691
PathogenBox_PlateE	A04	MMV688771	SCHISTOSOMIASIS	Cc1ccccc1C(=O)N2N=C(Nc3ccccc3)SC2(C)C	#NAME?		1	2	0	0.0454545	0.1	0.157895	88.7097	7.1138
PathogenBox_PlateE	A05	MMV687798	REFERENCE	C[C@H]1COc2c(N3CCN(C)CC3)c(F)cc4C(=O)C(=CN1c24)C(=O)O	#NAME?	Levofloxacin (-)-ofloxacin	0	0	0	0.0454545	0.05	0.0526316	67.9024	6.10493
PathogenBox_PlateE	A06	MMV688775	REFERENCE	CO[C@H]1\C=C\O[C@@]2(C)OC3=C(C2=O)C4=C(O)\C(=C/NN5CCN(C)CC5)\C(=N\C(=O)\C(=C/C=C\[C@H](C)[C@H](O)[C@@H](C)[C@@H](O)[C@@H](C)[C@H](OC(=O)C)[C@@H]1C)\C)\C(=C4C(=C3C)O)O	#NAME?	Rifampicin	0	0	0	0.0454545	0.05	0.105263	116.032	31.5182
PathogenBox_PlateE	A07	MMV676159	KINETOPLASTIDS	Clc1cccc(CO[C@H]2CCc3ccccc3[C@@H]2n4ccnn4)c1	#NAME?		3	4	4	0	0.1	0.157895	80.7104	0.267029
PathogenBox_PlateE	A08	MMV393144	MALARIA	CN1CCN(CC1)c2nccc3[nH]c(cc23)c4cccc(F)c4	#NAME?		0	2	4	0.0909091	0.1	0.157895	66.3172	6.40494
PathogenBox_PlateE	A09	MMV007920	MALARIA	Nc1ccc(cc1)C(=O)Nc2ccc(cc2)c3oc4ccccc4n3	#NAME?		0	0	0	0.0909091	0.05	0.210526	64.1582	14.0392
PathogenBox_PlateE	A10	MMV688270	SCHISTOSOMIASIS	COc1ccc(cc1)-c1cnc2cnc(cn12)-c1cccc(OC(C)C)c1	#NAME?		2	4	4	0.0454545	0	0.105263	39.0486	24.5906
PathogenBox_PlateE	A11	MMV019993	MALARIA	CC(Nc1nncc(n1)c2ccc(cc2)C(F)(F)F)c3cn(C)nc3C	#NAME?		0	0	0	0.136364	0.1	0.105263	77.4889	0.0740872
PathogenBox_PlateE	B02	MMV687794	MALARIA	CC1(C)Cc2c(CO1)c(nc3snc(Br)c23)N4CCOCC4	#NAME?		0	0	0	0.0454545	0.1	0.105263	71.5118	10.5902
PathogenBox_PlateE	B03	MMV676470	TUBERCULOSIS	CCOc1ccc(OCC(=O)Nc2cc(C)cc(C)c2)cc1	#NAME?		0	0	0	0.0909091	0.05	0.157895	66.972	9.52816
PathogenBox_PlateE	B04	MMV688938	TUBERCULOSIS	CCOc1ccc(cc1)c2nc(CNCCc3ccc(F)cc3)cs2	#NAME?		0	0	0	0.272727	0.4	0.631579	2.25739	4.25872
PathogenBox_PlateE	B05	MMV689000	REFERENCE COMPOUNDS	C[C@@H]1OC(=O)C[C@H](O)C[C@H](O)CC[C@@H](O)[C@H](O)C[C@H](O)C[C@]2(O)C[C@H](O)[C@H]([C@H](C[C@@H](O[C@@H]3O[C@H](C)[C@@H](O)[C@H](N)[C@@H]3O)\C=C\C=C\C=C\C=C\C=C\C=C\C=C\[C@H](C)[C@@H](O)[C@H]1C)O2)C(=O)O	#NAME?	Amphotericin B	0	0	0	0.136364	0.15	0.105263	94.9504	11.6571
PathogenBox_PlateE	B06	MMV004168	KINETOPLASTIDS	CN1CCCN(CC1)C(c2ccccc2)c3ccc(Cl)cc3	#NAME?		0	0	0	0.454545	0.05	0.263158	67.8552	17.8057
PathogenBox_PlateE	B07	MMV676161	KINETOPLASTIDS	C(N1CCOCC1)c2cc(n[nH]2)c3ccc(Oc4ccccc4)cc3	#NAME?		0	0	0	0.0454545	0.05	0.157895	85.9048	33.2029
PathogenBox_PlateE	B08	MMV023183	MALARIA	C(C1CC1)N2Cc3ccccc3OC4(CCN(Cc5c[nH]c6cnccc56)CC4)C2	#NAME?		0	0	0	0	0.1	0.210526	57.974	9.3577
PathogenBox_PlateE	B09	MMV047015	TUBERCULOSIS	COc1cc(nc2ccc(C)c(N)c12)C(F)(F)F	#NAME?		0	0	0	0.136364	0.05	0.0526316	79.3044	7.31038
PathogenBox_PlateE	B10	MMV688795	KINETOPLASTIDS	O=C(NCCc1ccn(n1)c2ccccc2)C3CCCCC3	#NAME?		0	0	0	0.136364	0	0.0526316	74.0547	12.681
PathogenBox_PlateE	B11	MMV688352	DENGUE	Clc1ccc(cc1)[C@@H]2[C@H](Oc3ccccc3)C(=O)N2CCn4cnc5c(NCc6ccccc6)ncnc45	#NAME?		3	4	4	0.136364	0.1	0.157895	68.0969	7.48573
PathogenBox_PlateE	C02	MMV676398	WOLBACHIA LF	CCS(=O)(=O)N(Cc1occc1)Cc2cc3ccc(C)cc3nc2O	#NAME?		0	1	0	0.2	0.333333	0.5	55.5496	14.2081
PathogenBox_PlateE	C03	MMV676472	TUBERCULOSIS	COc1cccc(OC)c1C(=O)Nc2ccc(Cl)c(c2)c3nc4ccccc4s3	#NAME?		2	2	2	0.4	0.5	0.625	107.517	48.7348
PathogenBox_PlateE	C04	MMV671636	ONCHOCERCIASIS	CC1=C(C(=O)c2c(F)cc(F)cc2N1)c3ccc(Oc4ccc(OC(F)(F)F)cc4)cc3	#NAME?		2	4	4	0.45	0.777778	0.75	74.5892	16.0232
PathogenBox_PlateE	C05	MMV676599	CRYPTOSPORIDIOSIS	CC(C)(C)n1nc(Cc2cccc3ccccc23)c4c(N)ncnc14	#NAME?		0	0	0	0.15	0.222222	0.625	85.4596	0.157573
PathogenBox_PlateE	C06	MMV689244	KINETOPLASTIDS	FC(F)(F)c1ccc(cc1)N2CCN(CC2)C(=O)[C@@H](c3ccc(Cl)cc3)c4cccnc4	#NAME?		0	2	4	0.75	0.722222	0.75	46.7742	12.2227	1
PathogenBox_PlateE	C07	MMV688411	TOXOPLASMOSIS	Nc1ncnc2n(CC3CCNCC3)nc(-c3cnc4ccccc4c3)c12	#NAME?		0	0	0	0.2	0.277778	0.5	168.694	5.21078			1	1
PathogenBox_PlateE	C08	MMV687765	TUBERCULOSIS	Cc1cnc(nc1Oc2ccc(cc2)n3ccnc3)N4CCN[C@@H](Cc5ccccc5)C4	#NAME?		4	4	4	0.3	0.555556	1	17.7949	15.1557	1
PathogenBox_PlateE	C09	MMV020165	MALARIA	CC(C)NCC(=O)Nc1cccc(c1)C(=O)Nc2cccc(c2)C(F)(F)F	#NAME?		0	0	0	0.2	0.166667	0.375	86.679	46.6411
PathogenBox_PlateE	C10	MMV676524	TUBERCULOSIS	Nc1cccnc1Nc2ccc(Cl)cc2	#NAME?		0	0	0	0.15	0.277778	0.375	157.272	44.1158			1
PathogenBox_PlateE	C11	MMV611037	TUBERCULOSIS	CCC(Sc1oc2ccccc2n1)C(=O)Nc3nnc(C)s3	#NAME?		0	0	0	0.1	0.111111	0.3125	82.8246	9.98949
PathogenBox_PlateE	D02	MMV688766	SCHISTOSOMIASIS	COc1ccc(c(O)c1)c2onc(c2c3ccc(Cl)cc3)C(F)(F)F	#NAME?		0	0	0	0.15	0.166667	0.1875	0.0885312	0.401647		1
PathogenBox_PlateE	D03	MMV200748	TUBERCULOSIS	COc1ccc(cc1)C2(CCCC2)C(=O)Nc3ccc(Br)cc3	#NAME?		0	0	1	0.25	0.388889	0.5	91.05	18.5021
PathogenBox_PlateE	D04	MMV667494	MALARIA	FC1(F)CCN(CCCCNc2cc(c3cc(ccc3n2)Cl)C(=O)NCCN2CCCC2)CC1	#NAME?		2	4	4	0.3	0.388889	0.5625	86.9446	12.1331
PathogenBox_PlateE	D05	MMV028694	MALARIA	OCCc1ccc(Nc2nccc(n2)c3nnc4ccccn34)cc1	#NAME?		0	1	4	0.2	0.555556	0.5625	109.221	32.8054
PathogenBox_PlateE	D06	MMV001499	REFERENCE	CC1CS(=O)(=O)CCN1\N=C\c2oc(cc2)[N+](=O)[O-]	#NAME?	Nifurtimox	0	0	0	0.3	0.277778	0.625	223.9	14.8906			1	1
PathogenBox_PlateE	D07	MMV688345	TOXOPLASMOSIS	Nc1nc(N)c2c3CCN(Cc4ccccc4)Cc3sc2n1	#NAME?		0	0	0	0.15	0.277778	0.4375	130.954	60.4839			1
PathogenBox_PlateE	D08	MMV010545	MALARIA	COc1ccc(cn1)c2cnc3ccc(NCc4ccc(cc4)S(=O)(=O)N)nn23	#NAME?		0	0	0	0.15	0.222222	0.3125	125.367	46.1108
PathogenBox_PlateE	D09	MMV023227	MALARIA	Cc1nc([nH]c1C)c2cccc(NCc3ccccc3)c2	#NAME?		0	0	0	0.1	0.111111	0.25	103.599	28.8734
PathogenBox_PlateE	D10	MMV687700	TUBERCULOSIS	Nc1ncnc2c1ncn2[C@@H]3O[C@H](COS(=O)(=O)NC(=O)c4ccccc4O)[C@@H](O)[C@H]3O	#NAME?		0	0	0	0.1	0.111111	0.125	113.386	30.6717
PathogenBox_PlateE	D11	MMV676384	TUBERCULOSIS	Fc1ccccc1c2oc(NCCc3ccccc3)c(n2)C#N	#NAME?		0	0	0	0.2	0.111111	0.125	93.968	21.3255
PathogenBox_PlateE	E02	MMV020289	MALARIA	Cc1ccc(NC(=O)c2cc(ccc2C)S(=O)(=O)NC(C)(C)C)nc1	#NAME?		0	0	0	0.2	0.222222	0.375	90.2284	2.28741
PathogenBox_PlateE	E03	MMV002816	REFERENCE	CCN(CC)C(=O)N1CCN(C)CC1	#NAME?	Diethylcarbamazine	0	0	0	0.15	0.222222	0.375	95.5228	41.0848
PathogenBox_PlateE	E04	MMV634140	MALARIA	Clc1ccc2nc(cc(c2c1)C(=O)NCCN1CCCC1)NCCN1CCOCC1	#NAME?		0	0	0	0.15	0.222222	0.4375	146.487	47.679			1
PathogenBox_PlateE	E05	MMV030734	MALARIA	CC(C)(CN)c1nc(c2ccc(Cl)c(O)c2)c([nH]1)c3ccnc(N)n3	#NAME?		0	0	0	0.15	0.166667	0.3125	155.966	18.6351			1
PathogenBox_PlateE	E06	MMV689243	KINETOPLASTIDS	FC(F)(F)c1ccc(cc1)N(C2CCN(CC2)c3ccc(cn3)C(F)(F)F)c4cccnc4	#NAME?		0	0	1	0.2	0.222222	0.3125	77.466	8.17262
PathogenBox_PlateE	E07	MMV676358	MALARIA	Nc1ncc(Br)cc1c2nc3cc(Cl)cnc3[nH]2	#NAME?		0	0	0	0.1	0.111111	0.1875	130.909	73.8171			1
PathogenBox_PlateE	E08	MMV687729	TUBERCULOSIS	OC[C@H]1CN(C(=O)O1)c2cc(F)c(C3=CCN(Cc4ccccc4)CC3)c(F)c2	#NAME?		0	0	2	0.05	0.111111	0.1875	126.632	53.1682
PathogenBox_PlateE	E09	MMV407834	MALARIA	CCOc1ccccc1NC(C)C(=O)Nc2cc(ccc2N3CCOCC3)C(F)(F)F	#NAME?		0	0	0	0.15	0.166667	0.3125	96.0204	12.7365
PathogenBox_PlateE	E10	MMV687813	TUBERCULOSIS	Fc1cc(cc(F)c1C2=CCN(Cc3ccccc3)CC2)N4C[C@H](COc5ccon5)OC4=O	#NAME?		0	0	0	0.1	0.166667	0.25	72.864	6.78239
PathogenBox_PlateE	E11	MMV153413	TUBERCULOSIS	CCOC(=O)c1c(C)c(sc1NC(=O)c2c(F)c(F)c(F)c(F)c2F)C(=O)N	#NAME?		4	4	4	1	1	1	-3.41811	1.71405	1				Hit rules applied
PathogenBox_PlateE	F02	MMV019551	MALARIA	CCC(NC(=O)c1ccccc1NC(=O)c2ccc(C)cc2)C(=O)OC	#NAME?		0	1	1	0.2	0.166667	0.25	82.8553	23.7723					U ≥2
PathogenBox_PlateE	F03	MMV688552	SCHISTOSOMIASIS	CC(C(SC1=NC=CC=N1)=C2C)=NN2C(NC3=CC=CC(C(F)(F)F)=C3)=O	#NAME?		0	0	0	0.15	0.166667	0.3125	137.036	14.6244			1		S ≥ 0.5
PathogenBox_PlateE	F04	MMV016838	MALARIA	Cc1ccc(cc1)-c1cc(c2cc(ccc2n1)Br)C(=O)Nc1cccnc1	#NAME?		2	1	0	0.5	0.666667	1	145.701	52.7395			1	1	F ≤ 50%
PathogenBox_PlateE	F05	MMV676270	MALARIA	C[C@@H](N1CCCC[C@@H]1c2ccc(OCc3cccc(F)c3)cc2)C(=O)N	#NAME?		0	0	0	0.2	0.444444	0.5	88.0975	85.075
PathogenBox_PlateE	F06	MMV688755	TUBERCULOSIS	[O-][N+](=O)c1cn2C[C@@H](COc2n1)OCc3ccc(OC(F)(F)F)cc3	#NAME?		0	0	0	0.2	0.166667	0.3125	158.335	23.3407			1
PathogenBox_PlateE	F07	MMV228911	TUBERCULOSIS	COc1cccc(NC(=O)c2c3CCCc3sc2NC(=O)c4cccnc4)c1	#NAME?		0	0	0	0.25	0.222222	0.4375	94.438	3.34996
PathogenBox_PlateE	F08	MMV272144	TUBERCULOSIS	COc1cccc(c1)n2nnnc2S(=O)(=O)C	#NAME?		4	4	4	1	1	1	-0.214395	2.1848	1
PathogenBox_PlateE	F09	MMV026313	MALARIA	Nc1nccc2ccc(Oc3ccncc3)cc12	#NAME?		0	0	0	0.1	0.222222	0.375	152.132	46.33			1
PathogenBox_PlateE	F10	MMV161996	TUBERCULOSIS	CC(C)CNS(=O)(=O)c1ccc(CCC(=O)Nc2ccc(Cl)cc2C)cc1	#NAME?		0	0	0	0.2	0.277778	0.375	107.117	21.0542
PathogenBox_PlateE	F11	MMV688543	DENGUE	CC(C)(C)C(=O)N(CCCCCCN1C[C@H](O)[C@@H](O)[C@H](O)[C@H]1CO)C2CCCCCC2	#NAME?		0	2	4	0.25	0.555556	1	121.637	2.81453
PathogenBox_PlateE	G02	MMV146306	TUBERCULOSIS	CCC(C)NC(=O)c1ccc(NC(=O)C2(CCCC2)c3ccccc3)cc1	#NAME?		0	0	0	0.05	0.027027	0.030303	90.6175	12.321
PathogenBox_PlateE	G03	MMV688557	TUBERCULOSIS	NCC(c1cccs1)S(=O)(=O)c2ccccc2	#NAME?		1	1	2	0.15	0.05	0.0555556	45.1527	30.9651
PathogenBox_PlateE	G04	MMV021013	TUBERCULOSIS	C1CCC(CC1)Nc2cc(nc(n2)c3ccccn3)C4CC4	#NAME?		0	0	0	0	0.0810811	0.151515	16.4359	0.614871		1
PathogenBox_PlateE	G05	MMV392832	MALARIA	COc1cccc(c1)c2cc3c(Nc4cccnc4)nccc3[nH]2	#NAME?		0	0	0	0.1	0.135135	0.151515	104.341	2.07505
PathogenBox_PlateE	G06	MMV688754	KINETOPLASTIDS	CO\N=C(/C(=O)OC)\c1ccccc1CO\N=C(/C)\c2cccc(c2)C(F)(F)F	#NAME?	Trifloxystrobin	1	0	0	0.05	0.027027	0.151515	108.923	11.8662
PathogenBox_PlateE	G07	MMV001561	KINETOPLASTIDS	CNCCC(Oc1ccc(cc1)C(F)(F)F)c2ccccc2	#NAME?	Fluoxetine	0	0	0	0.05	0.0810811	0.333333	20.39	10.2422		1
PathogenBox_PlateE	G08	MMV658988	KINETOPLASTIDS	CN(CCc1ccccc1)c2nc(nc(C)c2Cl)c3ccccn3	#NAME?		1	4	4	0	0.189189	0.69697	20.6685	7.01198	1
PathogenBox_PlateE	G09	MMV084864	MALARIA	O=C(Nc1cnc2ccccc2c1)c3cccc(c3)n4cnnn4	#NAME?		0	0	0	0	-0.027027	0.030303	85.6754	22.9435
PathogenBox_PlateE	G10	MMV676492	LYMPHATIC FILARIASIS	Sc1nnc(NC(=O)c2cc(Br)ccc2Cl)s1	#NAME?		0	0	0	0.05	0.027027	0.0909091	91.6957	8.42673
PathogenBox_PlateE	G11	MMV688415	KINETOPLASTIDS	CO[C@@H]1CN(C[C@H]1O)c2ccc(C#CC3(O)CN4CCC3CC4)c(Cc5ccccc5)n2	#NAME?		0	0	0	0	0	0.111111	90.7422	0.455032
PathogenBox_PlateE	H02	MMV688330	TOXOPLASMOSIS	CC(=O)N1CCN(CC1)c1ccc(Oc2ccc(Cl)cc2O)cc1	#NAME?		0	0	0	0.1	0.027027	0.030303	89.6897	9.05202
PathogenBox_PlateE	H03	MMV687796	REFERENCE	NCCC(O)C(=O)N[C@@H]1C[C@H](N)[C@@H](OC2O[C@H](CN)[C@@H](O)[C@H](O)[C@H]2O)[C@H](O)C1OC3O[C@H](CO)[C@@H](O)[C@H](N)[C@H]3O	#NAME?	Amikacin	0	0	0	0	0.0625	0	93.8008	4.02793
PathogenBox_PlateE	H04	MMV688939	TUBERCULOSIS	Cc1ccc2nc(C)c(c3ccn(Cc4ccccc4)n3)n2c1	#NAME?		3	4	4	0	0	0.111111	95.7234	8.10163
PathogenBox_PlateE	H05	MMV688978	REFERENCE	CCP(=[Au]S[C@H]1O[C@@H](COC(=O)C)[C@H](OC(=O)C)[C@@H](OC(=O)C)[C@@H]1OC(=O)C)(CC)CC	#NAME?	Auranofin	4	4	4	1	1	1	203.013	33.6453			1	1
PathogenBox_PlateE	H06	MMV688990	REFERENCE	CCCCCCCCCCCCCCCCOP(=O)([O-])OCC[N+](C)(C)C	#NAME?	Miltefosine	0	0	0	0.05	0.243243	0.272727	126.647	6.07317
PathogenBox_PlateE	H07	MMV688273	KINETOPLASTIDS	Nc1ccc2ncnc(Nc3ccc(OCc4cccc(F)c4)c(Cl)c3)c2c1	#NAME?		4	4	4	0.3	0.621622	0.878788	55.9038	4.20391
PathogenBox_PlateE	H08	MMV393995	TUBERCULOSIS	Cc1cc(O)nc(n1)n2nc(C)cc2C	#NAME?		0	0	0	0.15	0.243243	0.575758	93.1411	3.69711					Hit rules applied
PathogenBox_PlateE	H09	MMV1236379	KINETOPLASTIDS	CCOC(=O)c1noc(N)c1c2ccccc2	#NAME?		0	0	0	0.05	0.0810811	0.0909091	94.1485	8.43331					U ≥2
PathogenBox_PlateE	H10	MMV688550	KINETOPLASTIDS	CCc1ccccc1n2c(C)cn3c4C(=O)N(C(C(C)C)C(=O)OC)C(=O)N(C)c4nc23	#NAME?		1	0	0	0.15	0.405405	0.636364	107.795	9.66956					S ≥ 0.5
PathogenBox_PlateE	H11	MMV495543	TUBERCULOSIS	CC(C)(C)c1cnc(NC(=O)c2ccccc2O)s1	#NAME?		0	1	1	1	1	1	79.8629	8.10022					F ≤ 50%
															35	19	34	9

## Sheet: Table S3
ORIGINAL DATA																			2) Data transformation								3) Negative numbers become 0
						UCSD scores			Swiss TPH scores			FIOCRUZ DATA	1) Fiocruz data inversion		UCSD	max	median		UCSD scores			Swiss TPH scores			FIOCRUZ scores		UCSD scores			Swiss TPH scores			FIOCRUZ scores
Rack	Position	COMPOUND ID	Disease Set	SMILES	TRIVIAL NAME	24 h	48 h	72 h	24 h	48 h	72 h	% VIABILITY XTT	% VIABILITY XTT		24h	4	0		24 h	48 h	72 h	24 h	48 h	72 h	% VIABILITY XTT		24 h	48 h	72 h	24 h	48 h	72 h	% VIABILITY XTT
PathogenBox_PlateA	A02	MMV010764	MALARIA	C(Nc1nn2c(cnc2s1)c3cccs3)C4CCOCC4		0	0	0	0.181818	0.55	0.345455	95.6631	-95.6631		48h	4	0		0	0	0	0.0526316	0.4375	0.127273	-0.0565764		0	0	0	0.0526316	0.4375	0.127273	0
PathogenBox_PlateA	A03	MMV688472	TOXOPLASMOSIS	CC(Oc1cccc(Cl)c1)C(=O)Nc1ccc2oc(nc2c1)-c1ccncc1		1	0	0	0.318182	0.45	0.563636	108.782	-108.782		72h	4	0		0.25	0	0	0.210526	0.3125	0.418182	-0.17846		0.25	0	0	0.210526	0.3125	0.418182	0
PathogenBox_PlateA	A04	MMV688416	DENGUE	CC(C)(C)OC(=O)N1CCN(CC1)c2nccc(n2)c3ccc(s3)c4ccc(Cl)cc4		0	0	0	0.181818	0.15	0.181818	93.7397	-93.7397		STPH				0	0	0	0.0526316	-0.0625	-0.0909091	-0.0387075		0	0	0	0.0526316	0	0	0
PathogenBox_PlateA	A05	MMV689758	REFERENCE	COc1nc2ccc(Br)cc2cc1[C@@H](c3ccccc3)[C@@](O)(CCN(C)C)c4cccc5ccccc45	Bedaquiline	2	4	4	0.318182	0.8	0.945455	7.22669	-7.22669		24h	1	0.136364		0.5	1	1	0.210526	0.75	0.927273	0.765047		0.5	1	1	0.210526	0.75	0.927273	0.765047
PathogenBox_PlateA	A06	MMV688796	KINETOPLASTIDS	Fc1ccc(cc1)c2oc(cc2)C(=O)NCc3nnc4CCCCCn34		1	0	0	0.136364	0.15	0.181818	97.1009	-97.1009		48h	1	0.2		0.25	0	0	0	-0.0625	-0.0909091	-0.0699346		0.25	0	0	0	0	0	0
PathogenBox_PlateA	A07	MMV676526	TUBERCULOSIS	COc1ccc(cc1)c2cc(NC(=O)c3ccc(F)cc3Cl)ccc2OC		0	1	0	0.0909091	0.25	0.236364	89.6907	-89.6907		72h	1	0.25		0	0.25	0	-0.0526316	0.0625	-0.0181818	-0.00109003		0	0.25	0	0	0.0625	0	0
PathogenBox_PlateA	A08	MMV688553	TUBERCULOSIS	O=C(NCc1cocc1)N2CCN(Cc3ccc4OCOc4c3)CC2		0	0	0	0.136364	0.2	0.181818	76.2359	-76.2359		Fiocruz				0	0	0	0	0	-0.0909091	0.123912		0	0	0	0	0	0	0.123912
PathogenBox_PlateA	A09	MMV676501	TUBERCULOSIS	Clc1ccc(s1)C(=O)Nc2oc(nn2)c3ccc(Cl)s3		2	4	4	0	0	0	-3.40431	3.40431		72h	18.0627	-89.5734		0.5	1	1	-0.157895	-0.25	-0.333333	0.863815		0.5	1	1	0	0	0	0.863815
PathogenBox_PlateA	A10	MMV676449	TUBERCULOSIS	CCc1nc2ccccc2n1CC(O)COc3cc(C)ccc3Cl		0	0	0	0.0909091	0.25	0.236364	105.649	-105.649						0	0	0	-0.0526316	0.0625	-0.0181818	-0.149349		0	0	0	0	0.0625	0	0
PathogenBox_PlateA	A11	MMV676412	TUBERCULOSIS	Clc1ccc(cc1)S(=O)(=O)c2oc(nc2C#N)c3ccccc3		0	0	1	1	1	1	-7.60985	7.60985						0	0	0.25	1	1	1	0.902887		0	0	0.25	1	1	1	0.902887
PathogenBox_PlateA	B02	MMV1110498	WOLBACHIA LF	FC(F)(F)C1=C(C(N2CCCCC2)=O)N(C=CC=C3OC)C3=N1		0	0	0	0.181818	0.2	0.127273	95.731	-95.731						0	0	0	0.0526316	0	-0.163636	-0.0572077		0	0	0	0.0526316	0	0	0
PathogenBox_PlateA	B03	MMV000907	MALARIA	COc1cccc2c(C)nc(N=C(N)N)nc12		0	0	0	0.181818	0.2	0.127273	93.3217	-93.3217						0	0	0	0.0526316	0	-0.163636	-0.0348235		0	0	0	0.0526316	0	0	0
PathogenBox_PlateA	B04	MMV688889	TUBERCULOSIS	Clc1ccc(CCNc2cc(nc3ncnn23)c4ccccc4)cc1		0	1	0	0.136364	0.2	0.127273	83.8549	-83.8549						0	0.25	0	0	0	-0.163636	0.0531281		0	0.25	0	0	0	0	0.0531281
PathogenBox_PlateA	B05	MMV688776	KINETOPLASTIDS	Cc1nn2C(=O)C3=C(CCCC3)Nc2c1c4ccc(Cl)cc4		0	0	0	0.136364	0.2	0.127273	100.779	-100.779						0	0	0	0	0	-0.163636	-0.104111		0	0	0	0	0	0	0
PathogenBox_PlateA	B06	MMV688934	KINETOPLASTIDS	CCc1nn(C)c(C(=O)NCc2ccc(Oc3ccc(C)cc3)cc2)c1Cl	Tolfenpyrad	1	1	2	0.363636	0.55	0.454545	72.7914	-72.7914						0.25	0.25	0.5	0.263158	0.4375	0.272727	0.155914		0.25	0.25	0.5	0.263158	0.4375	0.272727	0.155914
PathogenBox_PlateA	B07	MMV676389	TUBERCULOSIS	O=C(N1CCN(Cc2ccc3OCOc3c2)CC1)c4[nH]nc5CCCCc45		0	0	0	0.0909091	0.25	0.236364	89.6344	-89.6344						0	0	0	-0.0526316	0.0625	-0.0181818	-0.000566893		0	0	0	0	0.0625	0	0
PathogenBox_PlateA	B08	MMV676603	TUBERCULOSIS	CC1COC2(CCN(CC2)C3=NC(=O)c4cc(cc(c4S3)[N+](=O)[O-])C(F)(F)F)O1		1	0	0	0.136364	0.25	0.290909	79.9657	-79.9657						0.25	0	0	0	0.0625	0.0545455	0.0892609		0.25	0	0	0	0.0625	0.0545455	0.0892609
PathogenBox_PlateA	B09	MMV676401	TUBERCULOSIS	C(Nc1nc(nc2ccccc12)N3CCCCC3)c4occc4		3	2	4	1	1	1	99.4827	-99.4827						0.75	0.5	1	1	1	1	-0.0920626		0.75	0.5	1	1	1	1	0
PathogenBox_PlateA	B10	MMV102872	TUBERCULOSIS	FC(F)(F)c1cccc(c1)C(=O)Nc2oc(nn2)c3ccc(Cl)cc3		0	4	4	0.0909091	0.25	0.945455	-9.98354	9.98354						0	1	1	-0.0526316	0.0625	0.927273	0.92494		0	1	1	0	0.0625	0.927273	0.92494
PathogenBox_PlateA	B11	MMV676477	TUBERCULOSIS	CCC1=C(C)N=C(NC1=O)n2nc(C)cc2NC(=O)c3ccccc3SC		0	1	3	0.272727	0.95	1	-1.12847	1.12847						0	0.25	0.75	0.157895	0.9375	1	0.842671		0	0.25	0.75	0.157895	0.9375	1	0.842671
PathogenBox_PlateA	C02	MMV084603	MALARIA	O=C1N(Cc2cc3ccccc3s2)CC4CN(Cc5ccccc5)CCN14		0	0	0	0.181818	0.3	0.236364	87.1661	-87.1661						0	0	0	0.0526316	0.125	-0.0181818	0.0223649		0	0	0	0.0526316	0.125	0	0.0223649
PathogenBox_PlateA	C03	MMV688548	TOXOPLASMOSIS	CC(C)(C)n1nc(-c2ccccc2)c2c(N)ncnc12		1	0	0	0.181818	0.2	0.127273	105.55	-105.55						0.25	0	0	0.0526316	0	-0.163636	-0.148435		0.25	0	0	0.0526316	0	0	0
PathogenBox_PlateA	C04	MMV688888	TUBERCULOSIS	CN1CCN(CC1)c2cc(nc(n2)c3ccncc3)c4ccc(F)cc4		0	0	0	0.181818	0.35	0.345455	63.0392	-63.0392						0	0	0	0.0526316	0.1875	0.127273	0.246518		0	0	0	0.0526316	0.1875	0.127273	0.246518
PathogenBox_PlateA	C05	MMV690028	KINETOPLASTIDS	COC1=C(OCCCCOC2=CC=C(C3=NNN=N3)C=C2)C=C(C4=NN(C5CCCCCC5)C(C4(C)C)=O)C=C1		1	0	0	0.181818	0.2	0.127273	3.50642	-3.50642						0.25	0	0	0.0526316	0	-0.163636	0.79961		0.25	0	0	0.0526316	0	0	0.79961
PathogenBox_PlateA	C06	MMV688943	KINETOPLASTIDS	CC1COC(Cn2cncn2)(O1)c3ccc(Oc4ccc(Cl)cc4)cc3Cl	Difenoconazol	2	1	2	0.136364	0.25	0.0727273	47.315	-47.315						0.5	0.25	0.5	0	0.0625	-0.236364	0.392604		0.5	0.25	0.5	0	0.0625	0	0.392604
PathogenBox_PlateA	C07	MMV053220	TUBERCULOSIS	NC(=O)COc1ccc(cc1)c2ccc(cc2)C#N		0	1	0	0.181818	0.2	0.127273	73.9293	-73.9293						0	0.25	0	0.0526316	0	-0.163636	0.145342		0	0.25	0	0.0526316	0	0	0.145342
PathogenBox_PlateA	C08	MMV676584	TUBERCULOSIS	Fc1ccc2c(Cl)c(sc2c1)C(=O)NC3=NCCS3		0	0	0	0.0909091	0.1	0.0181818	81.0216	-81.0216						0	0	0	-0.0526316	-0.125	-0.309091	0.0794509		0	0	0	0	0	0	0.0794509
PathogenBox_PlateA	C09	MMV676439	TUBERCULOSIS	Cc1ccc2nc(Cl)c(CNCc3cccs3)cc2c1		0	0	0	0.181818	0.2	0.0727273	83.1935	-83.1935						0	0	0	0.0526316	0	-0.236364	0.059273		0	0	0	0.0526316	0	0	0.059273
PathogenBox_PlateA	C10	MMV676395	TUBERCULOSIS	OC1=C(C(=O)Nc2cccnc2)C(=O)N3CCc4cccc1c34		0	0	0	0.181818	0.2	0.0727273	118.454	-118.454						0	0	0	0.0526316	0	-0.236364	-0.268315		0	0	0	0.0526316	0	0	0
PathogenBox_PlateA	C11	MMV676379	TUBERCULOSIS	COc1cccc(OCC(=O)c2ccc(Br)cc2)c1		0	0	0	0.181818	0.2	0.127273	101.469	-101.469						0	0	0	0.0526316	0	-0.163636	-0.11052		0	0	0	0.0526316	0	0	0
PathogenBox_PlateA	D02	MMV687762	KINETOPLASTIDS	C1CC(CCO1)c2cc(n[nH]2)c3ccc(Oc4ccccc4)cc3		0	0	0	0.181818	0.35	0.127273	98.406	-98.406						0	0	0	0.0526316	0.1875	-0.163636	-0.0820603		0	0	0	0.0526316	0.1875	0	0
PathogenBox_PlateA	D03	MMV1028806	MALARIA	Fc1ccccc1C2CC2C(=O)Nc3nc(cs3)c4ccccn4		0	0	0	0.181818	0.3	0.127273	71.7073	-71.7073						0	0	0	0.0526316	0.125	-0.163636	0.165986		0	0	0	0.0526316	0.125	0	0.165986
PathogenBox_PlateA	D04	MMV661713	TUBERCULOSIS	Brc1cncc(c1)c2cc(NCCCn3ccnc3)nc(n2)c4ccccc4		1	4	4	0.272727	0.65	0.672727	12.8791	-12.8791						0.25	1	1	0.157895	0.5625	0.563636	0.712533		0.25	1	1	0.157895	0.5625	0.563636	0.712533
PathogenBox_PlateA	D05	MMV688793	KINETOPLASTIDS	Cc1onc(C)c1COc2cccc(c2)C(=O)Nc3ncccc3C		0	0	0	0.0909091	0.15	0.127273	113.538	-113.538						0	0	0	-0.0526316	-0.0625	-0.163636	-0.222644		0	0	0	0	0	0	0
PathogenBox_PlateA	D06	MMV688942	KINETOPLASTIDS	CC(C)(C)C(O)C(Oc1ccc(cc1)c2ccccc2)n3cncn3	Bitertanol	1	0	0	0.0909091	0.15	0.127273	105.563	-105.563						0.25	0	0	-0.0526316	-0.0625	-0.163636	-0.148555		0.25	0	0	0	0	0	0
PathogenBox_PlateA	D07	MMV688554	TUBERCULOSIS	CNc1snc(C)c1C(=O)NCCOc2ccc(OC)cc2		1	0	0	0.0909091	0.15	0.127273	91.3206	-91.3206						0.25	0	0	-0.0526316	-0.0625	-0.163636	-0.0162329		0.25	0	0	0	0	0	0
PathogenBox_PlateA	D08	MMV676555	TUBERCULOSIS	Cc1nnc(NCc2cccc(Cl)c2)c3ccccc13		0	0	0	0	0.25	0.127273	102.465	-102.465						0	0	0	-0.157895	0.0625	-0.163636	-0.119768		0	0	0	0	0.0625	0	0
PathogenBox_PlateA	D09	MMV676383	TUBERCULOSIS	CCC(Sc1oc2ccccc2n1)C(=O)Nc3nccs3		2	4	4	0.181818	1	1	7.05788	-7.05788						0.5	1	1	0.0526316	1	1	0.766615		0.5	1	1	0.0526316	1	1	0.766615
PathogenBox_PlateA	D10	MMV676444	TUBERCULOSIS	O=C(NC1CCCCC1)N2CCN(Cc3ccc4OCOc4c3)CC2		0	0	0	0.0454545	0.2	0.127273	88.5566	-88.5566						0	0	0	-0.105263	0	-0.163636	0.00944623		0	0	0	0	0	0	0.00944623
PathogenBox_PlateA	D11	MMV676409	TUBERCULOSIS	Fc1cccc(OCC(=O)Nc2nc(cs2)c3ccccn3)c1		0	0	0	0.0909091	0.1	0.127273	68.0732	-68.0732						0	0	0	-0.0526316	-0.125	-0.163636	0.199749		0	0	0	0	0	0	0.199749
PathogenBox_PlateA	E02	MMV688514	KINETOPLASTIDS	NC(=N)c1ccc(cc1)c2cc(on2)c3ccccc3		2	1	0	0.181818	0.65	0.454545	91.6165	-91.6165						0.5	0.25	0	0.0526316	0.5625	0.272727	-0.0189812		0.5	0.25	0	0.0526316	0.5625	0.272727	0
PathogenBox_PlateA	E03	MMV676350	MALARIA	Cc1cnc(CCNC(=O)c2cc(cs2)c3ccc(Cl)cc3)[nH]1		1	1	0	0.136364	0.45	0.509091	79.6827	-79.6827						0.25	0.25	0	0	0.3125	0.345455	0.0918901		0.25	0.25	0	0	0.3125	0.345455	0.0918901
PathogenBox_PlateA	E04	MMV553002	TUBERCULOSIS	CS(=O)(=O)CC1=Nc2ccccc2OC1=O		0	0	0	0.181818	0.45	0.454545	355.209	-355.209						0	0	0	0.0526316	0.3125	0.272727	-2.4679		0	0	0	0.0526316	0.3125	0.272727	0
PathogenBox_PlateA	E05	MMV688797	KINETOPLASTIDS	CC1CCCCN1C(=O)NCCc2coc(n2)c3ccc(F)cc3		1	0	0	0.0909091	0.25	0.236364	130.99	-130.99						0.25	0	0	-0.0526316	0.0625	-0.0181818	-0.384781		0.25	0	0	0	0.0625	0	0
PathogenBox_PlateA	E06	MMV688756	TUBERCULOSIS	CC(=O)NC[C@H]1CN(C(=O)O1)c2ccc(N3CCSCC3)c(F)c2	Sutezolid	0	0	0	0.136364	0.2	0.236364	144.716	-144.716						0	0	0	0	0	-0.0181818	-0.512303		0	0	0	0	0	0	0
PathogenBox_PlateA	E07	MMV090930	TUBERCULOSIS	CCOC(=O)NC(=O)c1ccsc1NC(=O)c2nc3ccccc3s2		0	0	0	0.0909091	0.2	0.181818	133.545	-133.545						0	0	0	-0.0526316	0	-0.0909091	-0.408523		0	0	0	0	0	0	0
PathogenBox_PlateA	E08	MMV676431	TUBERCULOSIS	Cc1ccc(NC(=O)CC2COc3ccccc3O2)cc1Cl		0	0	0	0.136364	0.3	0.4	124.851	-124.851						0	0	0	0	0.125	0.2	-0.327745		0	0	0	0	0.125	0.2	0
PathogenBox_PlateA	E09	MMV676571	TUBERCULOSIS	COc1ccc(cc1OC)c2onc(n2)c3cccc(NC(=O)Cc4ccc(F)cc4)c3		0	0	1	0.181818	0.2	0.181818	137.388	-137.388						0	0	0.25	0.0526316	0	-0.0909091	-0.444228		0	0	0.25	0.0526316	0	0	0
PathogenBox_PlateA	E10	MMV676445	TUBERCULOSIS	CCCn1c(CNc2ccccc2O)nc3ccccc13		0	0	0	0.136364	0.2	0.181818	337.326	-337.326						0	0	0	0	0	-0.0909091	-2.30176		0	0	0	0	0	0	0
PathogenBox_PlateA	E11	MMV676589	TUBERCULOSIS	O=C(CCC1CCCCC1)Nc2cccc(c2)c3oc(nn3)c4occc4		2	4	4	0.181818	0.2	0.166667	144.945	-144.945						0.5	1	1	0.0526316	0	-0.111111	-0.514432		0.5	1	1	0.0526316	0	0	0
PathogenBox_PlateA	F02	MMV026020	MALARIA	CS(=O)(=O)c1cccc(c1)c2cnc3[nH]cc(c4ccc(CCC(=O)O)cc4)c3c2		0	0	0	0.227273	0.6	0.454545	86.9256	-86.9256						0	0	0	0.105263	0.5	0.272727	0.0245992		0	0	0	0.105263	0.5	0.272727	0.0245992
PathogenBox_PlateA	F03	MMV688471	TOXOPLASMOSIS	CC(C(=O)Nc1ccc2oc(nc2c1)-c1ccncc1)c1ccccc1		1	0	0	0.181818	0.35	0.345455	89.8644	-89.8644						0.25	0	0	0.0526316	0.1875	0.127273	-0.00270398		0.25	0	0	0.0526316	0.1875	0.127273	0
PathogenBox_PlateA	F04	MMV676388	TUBERCULOSIS	COc1cccc(c1)n2nnnc2S(=O)(=O)Cc3ccccc3		4	4	4	1	1	1	-7.15087	7.15087						1	1	1	1	1	1	0.898623		1	1	1	1	1	1	0.898623
PathogenBox_PlateA	F05	MMV202553	KINETOPLASTIDS	CCC(=O)Nc1ccccc1C(=O)Nc2ccccn2		1	0	0	0.136364	0.3	0.236364	87.2858	-87.2858						0.25	0	0	0	0.125	-0.0181818	0.021253		0.25	0	0	0	0.125	0	0.021253
PathogenBox_PlateA	F06	MMV688936	TUBERCULOSIS	Clc1cccc2sc(nc12)N(CCCn3ccnc3)C(=O)c4occc4		0	0	0	0.0909091	0.4	0.4	46.4379	-46.4379						0	0	0	-0.0526316	0.25	0.2	0.400753		0	0	0	0	0.25	0.2	0.400753
PathogenBox_PlateA	F07	MMV676476	TUBERCULOSIS	CC1=C(CCC(=O)O)C(=O)Oc2c(C)c(OCc3cc(C)cc(C)c3)ccc12		1	1	0	0.136364	0.2	0.127273	79.2807	-79.2807						0.25	0.25	0	0	0	-0.163636	0.0956244		0.25	0.25	0	0	0	0	0.0956244
PathogenBox_PlateA	F08	MMV676377	TUBERCULOSIS	Brc1c(nc2ncccn12)c3ccc4OCOc4c3		0	0	0	0.181818	0.2	0.127273	99.8896	-99.8896						0	0	0	0.0526316	0	-0.163636	-0.0958435		0	0	0	0.0526316	0	0	0
PathogenBox_PlateA	F09	MMV676406	TUBERCULOSIS	CC(C)n1ncc2c(cc(nc12)c3ccccc3)C(=O)NCC(N4CCOCC4)c5cccs5		2	0	1	0.272727	0.5	0.4	71.5512	-71.5512						0.5	0	0.25	0.157895	0.375	0.2	0.167436		0.5	0	0.25	0.157895	0.375	0.2	0.167436
PathogenBox_PlateA	F10	MMV676461	TUBERCULOSIS	CCOC(=O)c1cc(on1)c2csc(Nc3c(C)cc(C)cc3C)n2		1	1	0	0.181818	0.3	0.290909	95.5705	-95.5705						0.25	0.25	0	0.0526316	0.125	0.0545455	-0.0557164		0.25	0.25	0	0.0526316	0.125	0.0545455	0
PathogenBox_PlateA	F11	MMV676509	TUBERCULOSIS	Cc1ccc2oc(nc2c1)c3cc(NC(=O)Cc4ccccc4)ccc3Cl		1	0	0	0.227273	0.25	0.236364	109.285	-109.285						0.25	0	0	0.105263	0.0625	-0.0181818	-0.183135		0.25	0	0	0.105263	0.0625	0	0
PathogenBox_PlateA	G02	MMV688470	TOXOPLASMOSIS	CS(=O)(=O)N1CCC(CCn2nc(Cc3cccc4ccccc34)c3c(N)ncnc23)CC1		0	0	0	0.272727	0.45	0.509091	90.6814	-90.6814						0	0	0	0.157895	0.3125	0.345455	-0.0102944		0	0	0	0.157895	0.3125	0.345455	0
PathogenBox_PlateA	G03	MMV688704	TOXOPLASMOSIS	Cc1cc2nc(NC(=O)C(C)(C)C)nc(Cl)c2n1Cc1ccc(Cl)cc1		0	0	0	0.136364	0.4	0.345455	109.102	-109.102						0	0	0	0	0.25	0.127273	-0.181435		0	0	0	0	0.25	0.127273	0
PathogenBox_PlateA	G04	MMV188296	KINETOPLASTIDS	CNC(=O)C1Cc2ccccc2N1C(=O)Cc3ccc(F)cc3		0	0	0	0.227273	0.2	0.236364	84.2417	-84.2417						0	0	0	0.105263	0	-0.0181818	0.0495343		0	0	0	0.105263	0	0	0.0495343
PathogenBox_PlateA	G05	MMV688958	KINETOPLASTIDS	O=C(NCCc1csc(n1)c2ccccc2)c3ccccc3		1	0	0	0.136364	0.2	0.181818	86.7064	-86.7064						0.25	0	0	0	0	-0.0909091	0.0266359		0.25	0	0	0	0	0	0.0266359
PathogenBox_PlateA	G06	MMV063404	TUBERCULOSIS	Cc1nn(Cc2ccccc2)c(Cl)c1C(=O)NC3CCCCCC3		2	0	0	0.0454545	0.05	0.0727273	87.9316	-87.9316						0.5	0	0	-0.105263	-0.1875	-0.236364	0.0152531		0.5	0	0	0	0	0	0.0152531
PathogenBox_PlateA	G07	MMV676558	TUBERCULOSIS	CC1=NN(C(=O)C1Cc2cccc3ccccc23)c4nc5ccccc5s4		0	0	0	0.0909091	0.1	0.127273	61.7839	-61.7839						0	0	0	-0.0526316	-0.125	-0.163636	0.25818		0	0	0	0	0	0	0.25818
PathogenBox_PlateA	G08	MMV688555	TUBERCULOSIS	Clc1ccc(CN2CCN(CC2)C(=O)NCc3occc3)s1		0	0	0	0.136364	0.3	0.345455	93.5554	-93.5554						0	0	0	0	0.125	0.127273	-0.0369952		0	0	0	0	0.125	0.127273	0
PathogenBox_PlateA	G09	MMV676597	TUBERCULOSIS	CCCn1nnc(NC(=O)COc2ccc(cc2)C3CCCCC3)n1		0	0	0	0.136364	0.2	0.181818	89.6098	-89.6098						0	0	0	0	0	-0.0909091	-0.000338174		0	0	0	0	0	0	0
PathogenBox_PlateA	G10	MMV676588	TUBERCULOSIS	Nc1c2CCCCc2nc3sc4CCCCc4c13		4	4	4	0.545455	0.8	0.563636	89.3792	-89.3792						1	1	1	0.473684	0.75	0.418182	0.00180426		1	1	1	0.473684	0.75	0.418182	0.00180426
PathogenBox_PlateA	G11	MMV676554	TUBERCULOSIS	COc1ccc(Nc2ccccc2NC(=O)c3ccc(O)nc3)cc1		0	0	0	0.181818	0.45	0.4	176.208	-176.208						0	0	0	0.0526316	0.3125	0.2	-0.80488		0	0	0	0.0526316	0.3125	0.2	0
PathogenBox_PlateA	H02	MMV688350	DENGUE	COC(=O)c1ccc(F)cc1NS(=O)(=O)c2cccc(c2)c3cnn(Cc4ccccc4)c3		1	1	1	0.409091	0.45	0.454545	89.0716	-89.0716						0.25	0.25	0.25	0.315789	0.3125	0.272727	0.00466221		0.25	0.25	0.25	0.315789	0.3125	0.272727	0.00466221
PathogenBox_PlateA	H03	MMV688360	KINETOPLASTIDS	COc1ccc(cc1OCc2ccccn2)C3=NN(C4CCCCCC4)C(=O)C3(C)C		1	0	0	0.272727	0.4	0.4	91.8094	-91.8094						0.25	0	0	0.157895	0.25	0.2	-0.0207738		0.25	0	0	0.157895	0.25	0.2	0
PathogenBox_PlateA	H04	MMV099637	KINETOPLASTIDS	Cc1nn2c(O)c3CCCCc3nc2c1c4ccc(F)cc4		0	0	0	0.409091	0.45	0.509091	113.447	-113.447						0	0	0	0.315789	0.3125	0.345455	-0.221801		0	0	0	0.315789	0.3125	0.345455	0
PathogenBox_PlateA	H05	MMV688798	KINETOPLASTIDS	CS(=O)(=O)c1ccccc1C(=O)N(Cc2ccccc2)c3ccccc3		0	1	0	0.181818	0.4	0.4	105.607	-105.607						0	0.25	0	0.0526316	0.25	0.2	-0.148961		0	0.25	0	0.0526316	0.25	0.2	0
PathogenBox_PlateA	H06	MMV676539	TUBERCULOSIS	O=C(NCCc1c[nH]c2ccccc12)C3=Cc4ccccc4OC3=O		1	0	0	0.181818	0.4	0.454545	91.2228	-91.2228						0.25	0	0	0.0526316	0.25	0.272727	-0.0153238		0.25	0	0	0.0526316	0.25	0.272727	0
PathogenBox_PlateA	H07	MMV202458	TUBERCULOSIS	COc1ccc(OC(C)C(=O)Nc2ccc(Cl)cc2C)cc1		0	0	0	0.181818	0.35	0.345455	97.184	-97.184						0	0	0	0.0526316	0.1875	0.127273	-0.0707065		0	0	0	0.0526316	0.1875	0.127273	0
PathogenBox_PlateA	H08	MMV676474	TUBERCULOSIS	COc1ccccc1OCCCCn2c(nc3ccccc23)C4CC4		0	0	0	0.136364	0.2	0.181818	75.9515	-75.9515						0	0	0	0	0	-0.0909091	0.126555		0	0	0	0	0	0	0.126555
PathogenBox_PlateA	H09	MMV461553	TUBERCULOSIS	COC(=O)c1c2CCCCCc2sc1NC(=O)c3c(F)c(F)c(F)c(F)c3F		2	4	4	1	1	1	0.614913	-0.614913						0.5	1	1	1	1	1	0.826474		0.5	1	1	1	1	1	0.826474
PathogenBox_PlateA	H10	MMV676520	TUBERCULOSIS	O=C(N1CCN(Cc2ccc3OCOc3c2)CC1)c4oc5ccccc5c4		0	0	0	0.181818	0.15	0.236364	109.527	-109.527						0	0	0	0.0526316	-0.0625	-0.0181818	-0.185381		0	0	0	0.0526316	0	0	0
PathogenBox_PlateA	H11	MMV676512	TUBERCULOSIS	O=C(Nc1nc(cs1)c2ccccn2)c3cncn3c4ccccc4		0	0	0	0.0909091	0.15	0.236364	68.6615	-68.6615						0	0	0	-0.0526316	-0.0625	-0.0181818	0.194283		0	0	0	0	0	0	0.194283
PathogenBox_PlateB	A02	MMV676480	ONCHOCERCIASIS	COC(=O)c1c2CCN(Cc3ccccc3)Cc2sc1NC(=O)C4=Cc5ccccc5OC4=O		0	3	2	0.4	0.222222	0.555556	76.2934	-76.2934						0	0.75	0.5	0.305263	0.0277778	0.407407	0.123379		0	0.75	0.5	0.305263	0.0277778	0.407407	0.123379
PathogenBox_PlateB	A03	MMV652003	KINETOPLASTIDS	OB1OCc2ccc(NC(=O)c3ccccc3C(F)(F)F)cc12		0	0	0	0.1	0.0555556	0.166667	71.0842	-71.0842						0	0	0	-0.0421053	-0.180556	-0.111111	0.171775		0	0	0	0	0	0	0.171775
PathogenBox_PlateB	A04	MMV000062	REFERENCE	NC(=N)c1ccc(OCCCCCOc2ccc(cc2)C(=N)N)cc1	Pentamidine	0	0	0	0	0	0	81.8714	-81.8714						0	0	0	-0.157895	-0.25	-0.333333	0.0715561		0	0	0	0	0	0	0.0715561
PathogenBox_PlateB	A05	MMV006372	MALARIA	CN(C)CCNc1ncnc2c3cc(C)ccc3[nH]c12		1	0	1	0.25	0.222222	0.333333	72.5132	-72.5132						0.25	0	0.25	0.131579	0.0277778	0.111111	0.158499		0.25	0	0.25	0.131579	0.0277778	0.111111	0.158499
PathogenBox_PlateB	A06	MMV688854	CRYPTOSPORIDIOSIS	CCOc1ccc2cc(ccc2c1)c3nn(CC4CCN(C)CC4)c5ncnc(N)c35		0	0	0	0.1	0.166667	0.388889	44.3307	-44.3307						0	0	0	-0.0421053	-0.0416667	0.185185	0.42033		0	0	0	0	0	0.185185	0.42033
PathogenBox_PlateB	A07	MMV011903	MALARIA	Cc1ccc(NC(=O)c2nc[nH]c2C(=O)Nc3nc4ccccc4[nH]3)c(C)c1		3	4	4	0.272727	0.4	0.277778	50.7945	-50.7945						0.75	1	1	0.157895	0.25	0.037037	0.360278		0.75	1	1	0.157895	0.25	0.037037	0.360278
PathogenBox_PlateB	A08	MMV020591	MALARIA	CC(C)C(NC(=O)Cc1cccc2ccccc12)C(=O)Nc3cccc(c3)C#N		0	0	0	0.15	0.222222	0.333333	68.7579	-68.7579						0	0	0	0.0157895	0.0277778	0.111111	0.193387		0	0	0	0.0157895	0.0277778	0.111111	0.193387
PathogenBox_PlateB	A09	MMV020623	MALARIA	Cc1onc(C)c1C(=O)N2CCCC(C2)c3[nH]c4c(C)cccc4c3c5ccncc5		4	4	4	0.35	0.5	0.777778	67.5289	-67.5289						1	1	1	0.247368	0.375	0.703704	0.204806		1	1	1	0.247368	0.375	0.703704	0.204806
PathogenBox_PlateB	A10	MMV020512	MALARIA	Cc1ccc(Oc2ccc(NC(=O)CNc3ccccc3N4CCCC4=O)cc2)cc1		2	2	0	0.2	0.333333	0.555556	77.0367	-77.0367						0.5	0.5	0	0.0736842	0.166667	0.407407	0.116473		0.5	0.5	0	0.0736842	0.166667	0.407407	0.116473
PathogenBox_PlateB	A11	MMV688761	SCHISTOSOMIASIS	CS(=O)(=O)c1ccc(cc1[N+](=O)[O-])C(=O)N(CC2CCCO2)c3nc4ccccc4s3		4	4	4	1	1	1	-7.95694	7.95694						1	1	1	1	1	1	0.906111		1	1	1	1	1	1	0.906111
PathogenBox_PlateB	B02	MMV012074	TUBERCULOSIS	Cc1nc2ccccn2c1C(=O)NCc3ccc(Cl)cc3		0	0	0	0.1	0.189189	0.333333	80.9985	-80.9985						0	0	0	-0.0421053	-0.0135135	0.111111	0.0796651		0	0	0	0	0	0.111111	0.0796651
PathogenBox_PlateB	B03	MMV676604	KINETOPLASTIDS	CC(C)n1c(C)ncc1c2ccnc(Nc3ccc(cc3)S(=O)(=O)C)n2		0	0	0	0.15	0.135135	0.166667	66.9293	-66.9293						0	0	0	0.0157895	-0.0810811	-0.111111	0.210377		0	0	0	0.0157895	0	0	0.210377
PathogenBox_PlateB	B04	MMV002529	REFERENCE	O=C(C1CCCCC1)N2CC3N(CCc4ccccc34)C(=O)C2	Praziquantel	4	4	4	0.3	0.351351	0.555556	97.2915	-97.2915						1	1	1	0.189474	0.189189	0.407407	-0.071706		1	1	1	0.189474	0.189189	0.407407	0
PathogenBox_PlateB	B05	MMV687776	LYMPHATIC FILARIASIS	Cc1cc(ccc1C(=O)NCc2ccc3B(O)OC(C)(C)c3c2)C4=NOC(C4)(c5cc(Cl)c(F)c(Cl)c5)C(F)(F)F		0	0	0	0.2	0.135135	0.166667	23.1541	-23.1541						0	0	0	0.0736842	-0.0810811	-0.111111	0.617073		0	0	0	0.0736842	0	0	0.617073
PathogenBox_PlateB	B06	MMV687800	REFERENCE	CC(C)N=C1C=C2N(c3ccc(Cl)cc3)c4ccccc4N=C2C=C1Nc5ccc(Cl)cc5	Clofazimine	4	4	4	1	1	1	16.5894	-16.5894						1	1	1	1	1	1	0.678062		1	1	1	1	1	1	0.678062
PathogenBox_PlateB	B07	MMV020982	MALARIA	CC(C)(C)c1cc(cc(c1)C(=O)Nc2cccnc2)C(=O)Nc3cccnc3		0	0	0	0	0.0810811	0.0555556	79.8476	-79.8476						0	0	0	-0.157895	-0.148649	-0.259259	0.0903578		0	0	0	0	0	0	0.0903578
PathogenBox_PlateB	B08	MMV020120	MALARIA	CC1CC1C(=O)NC2CCN(CC3(CCCCC3)c4ccccc4)CC2		1	0	0	0	0.0810811	0.222222	82.3831	-82.3831						0.25	0	0	-0.157895	-0.148649	-0.037037	0.0668014		0.25	0	0	0	0	0	0.0668014
PathogenBox_PlateB	B09	MMV676605	MALARIA	C[C@@]1(O)C[C@@H](C1)c2nc(c3ccc4ccc(nc4c3)c5ccccc5)c6c(N)nccn26		0	0	0	0.05	0.027027	0.111111	63.9869	-63.9869						0	0	0	-0.1	-0.216216	-0.185185	0.237713		0	0	0	0	0	0	0.237713
PathogenBox_PlateB	B10	MMV007638	MALARIA	CCOc1ccc(cc1)c2nc(NC(=O)CS(=O)(=O)c3ccccc3)sc2C		0	0	1	0.1	0.0810811	0.111111	61.8325	-61.8325						0	0	0.25	-0.0421053	-0.148649	-0.185185	0.257728		0	0	0.25	0	0	0	0.257728
PathogenBox_PlateB	B11	MMV021057	MALARIA	CO\C=C(\C(=O)OC)/c1ccccc1Oc2cc(Oc3ccccc3C#N)ncn2	Azoxystrobin	0	0	0	0.05	0.027027	0.111111	79.48	-79.48						0	0	0	-0.1	-0.216216	-0.185185	0.0937732		0	0	0	0	0	0	0.0937732
PathogenBox_PlateB	C02	MMV690027	KINETOPLASTIDS	COC1=C(OCCCCOC2=CC=C(C3=NNN=N3)C=C2)C=C(C([C@@H]4[C@H]5CC=CC4)=NN(C6CCCCCC6)C5=O)C=C1		2	0	0	0.35	0.567568	0.666667	31.0287	-31.0287						0.5	0	0	0.247368	0.459459	0.555556	0.543913		0.5	0	0	0.247368	0.459459	0.555556	0.543913
PathogenBox_PlateB	C03	MMV676600	KINETOPLASTIDS	CO[C@@H](C(=O)N1Cc2[nH]nc(NC(=O)c3ccc(cc3)N4CCN(C)CC4)c2C1)c5ccccc5		0	0	0	0.15	0.243243	0.277778	97.4444	-97.4444						0	0	0	0.0157895	0.0540541	0.037037	-0.0731259		0	0	0	0.0157895	0.0540541	0.037037	0
PathogenBox_PlateB	C04	MMV676382	SCHISTOSOMIASIS	Cn1ncc2c(nc(NCCc3c[nH]c4ccccc34)nc12)N1CCOCC1		4	4	4	0.45	0.675676	0.944444	71.8503	-71.8503						1	1	1	0.363158	0.594595	0.925926	0.164658		1	1	1	0.363158	0.594595	0.925926	0.164658
PathogenBox_PlateB	C05	MMV001625	REFERENCE	NCCCC(N)(C(F)F)C(=O)O	alpha-Difluoromethylornithine	0	0	0	0.15	0.135135	0.222222	87.0771	-87.0771						0	0	0	0.0157895	-0.0810811	-0.037037	0.0231919		0	0	0	0.0157895	0	0	0.0231919
PathogenBox_PlateB	C06	MMV001493	ONCHOCERCIASIS	COC(=O)C1=C(C)NC(=C(C1c2cccc3nonc23)C(=O)OC(C)C)C	Isradipine	2	0	0	0.15	0.189189	0.111111	63.2036	-63.2036						0.5	0	0	0.0157895	-0.0135135	-0.185185	0.24499		0.5	0	0	0.0157895	0	0	0.24499
PathogenBox_PlateB	C07	MMV020136	MALARIA	CNC(=O)c1cc(cs1)S(=O)(=O)N2CCN(CC2)c3ccccn3		0	0	0	0.1	0.135135	0.111111	73.4178	-73.4178						0	0	0	-0.0421053	-0.0810811	-0.185185	0.150094		0	0	0	0	0	0	0.150094
PathogenBox_PlateB	C08	MMV020710	MALARIA	COc1ccc(Cl)cc1NC(=O)CN(C)C(=O)c2cnn(n2)c3ccccc3		0	0	0	0.2	0.351351	0.388889	78.3819	-78.3819						0	0	0	0.0736842	0.189189	0.185185	0.103975		0	0	0	0.0736842	0.189189	0.185185	0.103975
PathogenBox_PlateB	C09	MMV020517	MALARIA	COc1ccccc1CNC(=O)c2cc(nc3c2cnn3C(C)C)C4CC4		0	0	0	0.2	0.459459	0.666667	38.3508	-38.3508						0	0	0	0.0736842	0.324324	0.555556	0.475886		0	0	0	0.0736842	0.324324	0.555556	0.475886
PathogenBox_PlateB	C10	MMV019721	MALARIA	CCN(CC)S(=O)(=O)c1ccc(Cl)c(c1)C(=O)Nc2ccc3nc(C)sc3c2		1	0	0	0.05	0.027027	0.111111	87.8893	-87.8893						0.25	0	0	-0.1	-0.216216	-0.185185	0.0156464		0.25	0	0	0	0	0	0.0156464
PathogenBox_PlateB	C11	MMV688763	SCHISTOSOMIASIS	CNc1nnc(SC2=C(Cl)C(=O)N(N=C2)c3ccccc3)s1		4	4	4	1	1	1	-5.82868	5.82868						1	1	1	1	1	1	0.886339		1	1	1	1	1	1	0.886339
PathogenBox_PlateB	D02	MMV020537	MALARIA	Clc1ccc2OCCN(c3ccc(s3)C(=O)NC4CC4)c2c1		0	0	0	0.35	0.459459	0.5	83.4724	-83.4724						0	0	0	0.247368	0.324324	0.333333	0.0566814		0	0	0	0.247368	0.324324	0.333333	0.0566814
PathogenBox_PlateB	D03	MMV637953	REFERENCE	Cc1ccc(cc1NC(=O)c2cccc(NC(=O)Nc3cccc(c3)C(=O)Nc4cc(ccc4C)C(=O)Nc5ccc(c6cc(cc(c56)S(=O)(=O)O)S(=O)(=O)O)S(=O)(=O)O)c2)C(=O)Nc7ccc(c8cc(cc(c78)S(=O)(=O)O)S(=O)(=O)O)S(=O)(=O)O	Suramin	0	0	0	0.15	0.297297	0.388889	94.8301	-94.8301						0	0	0	0.0157895	0.121622	0.185185	-0.0488378		0	0	0	0.0157895	0.121622	0.185185	0
PathogenBox_PlateB	D04	MMV676536	SCHISTOSOMIASIS	COCC(C)NC(=O)CSc1ncnc2sc(cc12)-c1ccccc1		0	0	0	0.1	0.135135	0.111111	93.6397	-93.6397						0	0	0	-0.0421053	-0.0810811	-0.185185	-0.0377782		0	0	0	0	0	0	0
PathogenBox_PlateB	D05	MMV000063	REFERENCE	CCN(CC)CCCCCCNc1cc(OC)cc2c(C)ccnc12	Sitamaquine	0	0	0	0.1	0.135135	0.166667	59.2888	-59.2888						0	0	0	-0.0421053	-0.0810811	-0.111111	0.281361		0	0	0	0	0	0	0.281361
PathogenBox_PlateB	D06	MMV689255	CRYPTOSPORIDIOSIS	Nc1ncnc2c1ncn2C[C@@H](O)[C@@H](O)C(=O)O	D-Eritadenine	0	0	0	0.1	0.189189	0.222222	63.7	-63.7						0	0	0	-0.0421053	-0.0135135	-0.037037	0.240378		0	0	0	0	0	0	0.240378
PathogenBox_PlateB	D07	MMV019838	MALARIA	FC(F)(F)c1cc(cc(c1)C(F)(F)F)C(=O)Nc2ccnc(n2)c3cccnc3		0	0	0	0.1	0.0810811	0.111111	90.9997	-90.9997						0	0	0	-0.0421053	-0.148649	-0.185185	-0.0132513		0	0	0	0	0	0	0
PathogenBox_PlateB	D08	MMV020520	MALARIA	Cc1cc2ccccc2n1CC(=O)N3CC(Oc4ccccc34)C(=O)N5CCCCC5		0	1	0	0.05	0.027027	0.111111	71.4889	-71.4889						0	0.25	0	-0.1	-0.216216	-0.185185	0.168015		0	0.25	0	0	0	0	0.168015
PathogenBox_PlateB	D09	MMV019234	MALARIA	COc1ccc(cc1OC)C2CC(=NN2C(=O)c3occc3)c4cccs4		0	0	0	0.1	0.135135	0.166667	65.6629	-65.6629						0	0	0	-0.0421053	-0.0810811	-0.111111	0.222142		0	0	0	0	0	0	0.222142
PathogenBox_PlateB	D10	MMV016136	MALARIA	Cc1cc(Nc2ccncc2)n3nc(C)c(c4ccccc4Cl)c3n1		0	0	0	0.1	0.135135	0.166667	64.9321	-64.9321						0	0	0	-0.0421053	-0.0810811	-0.111111	0.228931		0	0	0	0	0	0	0.228931
PathogenBox_PlateB	D11	MMV688762	SCHISTOSOMIASIS	C1CCN(C1)C(c2ccccn2)c3c([nH]c4ccccc34)c5ccccc5		4	4	4	1	1	1	-3.39538	3.39538						1	1	1	1	1	1	0.863732		1	1	1	1	1	1	0.863732
PathogenBox_PlateB	E02	MMV676386	TUBERCULOSIS	Cc1cccc(Cn2ccc(NC(=O)c3ccc4OCOc4c3)n2)c1		0	0	0	0.0555556	0.125	0	93.173	-93.173						0	0	0	-0.0935673	-0.09375	-0.333333	-0.0334429		0	0	0	0	0	0	0
PathogenBox_PlateB	E03	MMV688773	REFERENCE	[O-][N+](=O)c1nccn1CC(=O)NCc2ccccc2	Benznidazole	0	0	0	0.15	0.243243	0.222222	89.2415	-89.2415						0	0	0	0.0157895	0.0540541	-0.037037	0.00308375		0	0	0	0.0157895	0.0540541	0	0.00308375
PathogenBox_PlateB	E04	MMV000011	REFERENCE	C[C@@H]1[C@H]2[C@H](O)[C@H]3[C@H](N(C)C)C(=C(C(=O)N)C(=O)[C@@]3(O)C(=C2C(=O)c4c(O)cccc14)O)O	Doxycycline	0	0	0	0.2	0.297297	0.222222	164.567	-164.567						0	0	0	0.0736842	0.121622	-0.037037	-0.696737		0	0	0	0.0736842	0.121622	0	0
PathogenBox_PlateB	E05	MMV687775	LYMPHATIC FILARIASIS	CC1(C)OB(O)c2ccc(cc12)C3=NOC(C3)(c4cc(Cl)c(F)c(Cl)c4)C(F)(F)F		2	0	1	1	1	1	33.4552	-33.4552						0.5	0	0.25	1	1	1	0.52137		0.5	0	0.25	1	1	1	0.52137
PathogenBox_PlateB	E06	MMV002817	ONCHOCERCIASIS	Oc1c(I)cc(I)c2cccnc12	Iodoquinol	2	1	2	0.1	0.135135	0.333333	6.5826	-6.5826						0.5	0.25	0.5	-0.0421053	-0.0810811	0.111111	0.771031		0.5	0.25	0.5	0	0	0.111111	0.771031
PathogenBox_PlateB	E07	MMV676442	MALARIA	CC(C)c1ncc(c2ccncc2)c(n1)[C@@H]3CC[C@@H](CNC(=O)c4cccnc4)CC3		0	0	0	0.05	0.0810811	0.111111	94.0363	-94.0363						0	0	0	-0.1	-0.148649	-0.185185	-0.0414627		0	0	0	0	0	0	0
PathogenBox_PlateB	E08	MMV020152	MALARIA	Cc1onc(c1)C(=O)Nc2ccc(cc2)c3ccccc3		0	0	0	0.1	0.0810811	0.111111	90.7189	-90.7189						0	0	0	-0.0421053	-0.148649	-0.185185	-0.0106422		0	0	0	0	0	0	0
PathogenBox_PlateB	E09	MMV024397	MALARIA	O=C(NC1CC1)c2ccc(nc2)N3CCC(Cc4ccccc4)CC3		0	0	0	0.1	0.0810811	0.166667	91.0823	-91.0823						0	0	0	-0.0421053	-0.148649	-0.111111	-0.0140183		0	0	0	0	0	0	0
PathogenBox_PlateB	E10	MMV019807	MALARIA	Cc1ccc2cc(C3NC(=O)c4ccccc4N3)c(Cl)nc2c1		0	0	1	0.05	0.0810811	0.111111	99.0373	-99.0373						0	0	0.25	-0.1	-0.148649	-0.185185	-0.087925		0	0	0.25	0	0	0	0
PathogenBox_PlateB	E11	MMV560185	MALARIA	C1CCN(CC1)c2cc(nc3ccccc23)c4ccccn4		1	0	1	0.15	0.243243	0.388889	59.8714	-59.8714						0.25	0	0.25	0.0157895	0.0540541	0.185185	0.275948		0.25	0	0.25	0.0157895	0.0540541	0.185185	0.275948
PathogenBox_PlateB	F02	MMV019189	MALARIA	Cc1ccc2c(NC(=O)C23NN=C(S3)c4ccccc4)c1C		2	0	0	0	0.135135	0.222222	125.472	-125.472						0.5	0	0	-0.157895	-0.0810811	-0.037037	-0.333518		0.5	0	0	0	0	0	0
PathogenBox_PlateB	F03	MMV688774	REFERENCE	CC[C@@H]([C@H](C)O)N1N=CN(C1=O)c2ccc(cc2)N3CCN(CC3)c4ccc(OC[C@@H]5CO[C@](Cn6cncn6)(C5)c7ccc(F)cc7F)cc4	Posaconazole	3	4	4	0.2	0.243243	0.555556	88.8314	-88.8314						0.75	1	1	0.0736842	0.0540541	0.407407	0.00689343		0.75	1	1	0.0736842	0.0540541	0.407407	0.00689343
PathogenBox_PlateB	F04	MMV003270	HOOKWORM	ClC1=CC(N=C(N)O2)=C2C=C1	Zoxazolamine	0	0	0	1	1	1	76.515	-76.515						0	0	0	1	1	1	0.12132		0	0	0	1	1	1	0.12132
PathogenBox_PlateB	F05	MMV637229	TRICHURIASIS	ClC1=CC=C([C@@](C)(C2=CC=CC=C2)OCCC3N(C)CCC3)C=C1	Clemastine	2	4	4	0.9	1	1	46.5916	-46.5916						0.5	1	1	0.884211	1	1	0.399325		0.5	1	1	0.884211	1	1	0.399325
PathogenBox_PlateB	F06	MMV688853	CRYPTOSPORIDIOSIS	CCOc1ccc2cc(cnc2c1)c3nn(c(N)c3C(=O)N)C(C)(C)C		0	0	0	0.2	0.243243	0.388889	75.1909	-75.1909						0	0	0	0.0736842	0.0540541	0.185185	0.133621		0	0	0	0.0736842	0.0540541	0.185185	0.133621
PathogenBox_PlateB	F07	MMV020321	MALARIA	COc1ccccc1C(C)NCC(=O)Nc2cc(ccc2Cl)C(F)(F)F		0	0	0	0.15	0.135135	0.277778	67.6887	-67.6887						0	0	0	0.0157895	-0.0810811	0.037037	0.203321		0	0	0	0.0157895	0	0.037037	0.203321
PathogenBox_PlateB	F08	MMV019087	MALARIA	Cc1cc(C)n2nc(nc2n1)C(=O)Nc3cc(ccc3N4CCOCC4)C(F)(F)F		0	0	0	0.05	0.135135	0.222222	73.3328	-73.3328						0	0	0	-0.1	-0.0810811	-0.037037	0.150885		0	0	0	0	0	0	0.150885
PathogenBox_PlateB	F09	MMV676528	MALARIA	CN(c1ccc(F)cc1)S(=O)(=O)c2ccc(Cl)c(c2)C(=O)Nc3cccc(C)n3		0	0	0	0.05	0.135135	0.222222	80.9638	-80.9638						0	0	0	-0.1	-0.0810811	-0.037037	0.0799875		0	0	0	0	0	0	0.0799875
PathogenBox_PlateB	F10	MMV020320	MALARIA	Cc1oc(NC(=O)c2cn(nc2c3ccccc3C)c4ccccc4)nn1		1	1	1	0	0.0810811	0.111111	56.846	-56.846						0.25	0.25	0.25	-0.157895	-0.148649	-0.185185	0.304056		0.25	0.25	0.25	0	0	0	0.304056
PathogenBox_PlateB	F11	MMV085210	MALARIA	Clc1ccc(cc1)S(=O)(=O)NC(Cc2c[nH]c3ccccc23)C(=O)N4CCCCC4		0	0	0	0.05	0.0810811	0.111111	96.4045	-96.4045						0	0	0	-0.1	-0.148649	-0.185185	-0.0634645		0	0	0	0	0	0	0
PathogenBox_PlateB	G02	MMV069458	TUBERCULOSIS	FC(F)(F)c1nnc2ccc(Cl)nn12		1	0	0	0.2	0.189189	0.333333	83.9524	-83.9524						0.25	0	0	0.0736842	-0.0135135	0.111111	0.052222		0.25	0	0	0.0736842	0	0.111111	0.052222
PathogenBox_PlateB	G03	MMV688991	REFERENCE	CC(=O)Oc1ccccc1C(=O)Nc2ncc(s2)[N+](=O)[O-]	Nitazoxanide	2	4	4	0.2	0.297297	0.555556	101.978	-101.978						0.5	1	1	0.0736842	0.121622	0.407407	-0.115247		0.5	1	1	0.0736842	0.121622	0.407407	0
PathogenBox_PlateB	G04	MMV687801	REFERENCE	CC[C@H](CO)NCCN[C@H](CC)CO	Ethambutol	0	0	0	0.15	0.135135	0.277778	78.3342	-78.3342						0	0	0	0.0157895	-0.0810811	0.037037	0.104419		0	0	0	0.0157895	0	0.037037	0.104419
PathogenBox_PlateB	G05	MMV689480	REFERENCE	O=C1C(CC2CCC(C(C)(C)C)CC2)=C(C(C3=C1C=CC=C3)=O)O	Buparvaquone	3	2	2	0.2	0.189189	0.277778	71.7227	-71.7227						0.75	0.5	0.5	0.0736842	-0.0135135	0.037037	0.165843		0.75	0.5	0.5	0.0736842	0	0.037037	0.165843
PathogenBox_PlateB	G06	MMV003152	REFERENCE	COC(=O)Nc1nc2cc(ccc2[nH]1)C(=O)c3ccccc3	Mebendazole	0	0	0	0.15	0.189189	0.277778	71.1162	-71.1162						0	0	0	0.0157895	-0.0135135	0.037037	0.171478		0	0	0	0.0157895	0	0.037037	0.171478
PathogenBox_PlateB	G07	MMV006239	MALARIA	Brc1ccc2NC(=O)C3(NCCc4c3[nH]c5ccccc45)c2c1		0	0	0	0.05	0.0810811	0.166667	109.095	-109.095						0	0	0	-0.1	-0.148649	-0.111111	-0.181367		0	0	0	0	0	0	0
PathogenBox_PlateB	G08	MMV000858	MALARIA	Clc1ccc(cc1)S(=O)(=O)N2CCN(CC2)C(=S)NCc3occc3		1	0	0	0.05	0.0810811	0.111111	75.155	-75.155						0.25	0	0	-0.1	-0.148649	-0.185185	0.133955		0.25	0	0	0	0	0	0.133955
PathogenBox_PlateB	G09	MMV006741	MALARIA	COc1cc2ncnc(NC3CCN(Cc4ccccc4)CC3)c2cc1OC		0	0	0	0.1	0.135135	0.0555556	86.5068	-86.5068						0	0	0	-0.0421053	-0.0810811	-0.259259	0.02849		0	0	0	0	0	0	0.02849
PathogenBox_PlateB	G10	MMV688768	SCHISTOSOMIASIS	CN1CCN(CC1)C(c2cccs2)c3c(C)[nH]c4ccccc34		3	4	4	1	1	1	6.43398	-6.43398						0.75	1	1	1	1	1	0.772412		0.75	1	1	1	1	1	0.772412
PathogenBox_PlateB	G11	MMV000023	REFERENCE	COc1cc(NC(C)CCCN)c2ncccc2c1	Primaquine	0	0	0	0	0.135135	0.333333	77.4071	-77.4071						0	0	0	-0.157895	-0.0810811	0.111111	0.113031		0	0	0	0	0	0.111111	0.113031
PathogenBox_PlateB	H02	MMV676602	KINETOPLASTIDS	CNC(=O)c1nn(C)c2c3nc(Nc4ccc(cc4)N5CCN(C)CC5)ncc3CC(C)(C)c12		3	4	4	0.363636	0.8	0.890909	156.512	-156.512						0.75	1	1	0.263158	0.75	0.854545	-0.621902		0.75	1	1	0.263158	0.75	0.854545	0
PathogenBox_PlateB	H03	MMV000014	REFERENCE	O[C@H]([C@H]1CCCCN1)c2cc(nc3c(cccc23)C(F)(F)F)C(F)(F)F	Mefloquine	4	4	4	0.954545	1	1	-0.138817	0.138817						1	1	1	0.947368	1	1	0.833477		1	1	1	0.947368	1	1	0.833477
PathogenBox_PlateB	H04	MMV687803	REFERENCE	CC(=O)NC[C@@H]1CN(C(=O)O1)c2ccc(N3CCOCC3)c(F)c2	Linezolid	0	0	0	0.227273	0.2	0.181818	94.2177	-94.2177						0	0	0	0.105263	0	-0.0909091	-0.0431483		0	0	0	0.105263	0	0	0
PathogenBox_PlateB	H05	MMV668727	ONCHOCERCIASIS	Nc1ncc(cc1c2ccc(nc2)C(F)(F)F)c3ccc(nc3)C(F)(F)F		0	0	0	0.181818	0.15	0.127273	79.2514	-79.2514						0	0	0	0.0526316	-0.0625	-0.163636	0.095897		0	0	0	0.0526316	0	0	0.095897
PathogenBox_PlateB	H06	MMV019742	MALARIA	Cc1ccc(cc1)S(=O)(=O)N2CCN(CC2)C(=O)c3cc([nH]n3)c4ccccc4		2	2	1	0.454545	0.75	0.836364	82.6076	-82.6076						0.5	0.5	0.25	0.368421	0.6875	0.781818	0.0647157		0.5	0.5	0.25	0.368421	0.6875	0.781818	0.0647157
PathogenBox_PlateB	H07	MMV009054	MALARIA	Cc1onc(c1)C(=O)Nc2cnn(Cc3ccc(Cl)cc3Cl)c2		0	0	0	0.181818	0.1	0.127273	91.7399	-91.7399						0	0	0	0.0526316	-0.125	-0.163636	-0.0201284		0	0	0	0.0526316	0	0	0
PathogenBox_PlateB	H08	MMV006901	MALARIA	CN(C)c1cc(NC(=O)Nc2ccccc2)c3ccccc3n1		1	0	0	0.181818	0.35	0.454545	-13.7369	13.7369						0.25	0	0	0.0526316	0.1875	0.272727	0.95981		0.25	0	0	0.0526316	0.1875	0.272727	0.95981
PathogenBox_PlateB	H09	MMV020391	MALARIA	CC(C)C(C(=O)Nc1ccc(cc1)S(=O)(=O)N(C)C)c2ccc(Cl)cc2		2	4	4	0.954545	0.85	1	29.4612	-29.4612						0.5	1	1	0.947368	0.8125	1	0.558476		0.5	1	1	0.947368	0.8125	1	0.558476
PathogenBox_PlateB	H10	MMV676380	MALARIA	CC(=O)Nc1ccc(NC(=O)c2cc([nH]n2)c3cc(Cl)ccc3O)cc1		0	0	0	0.227273	0.15	0.127273	94.2362	-94.2362						0	0	0	0.105263	-0.0625	-0.163636	-0.0433205		0	0	0	0.105263	0	0	0
PathogenBox_PlateB	H11	MMV688994	REFERENCE	CNC1C(O)C(O)C(CO)OC1OC2C(OC3C(O)C(O)C(NC(=N)N)C(O)C3NC(=N)N)OC(C)C2(O)C=O	Streptomycin	0	0	0	0.181818	0.1	0.0727273	92.9728	-92.9728						0	0	0	0.0526316	-0.125	-0.236364	-0.031582		0	0	0	0.0526316	0	0	0
PathogenBox_PlateC	A02	MMV675997	KINETOPLASTIDS	Fc1ccc(cc1)N2CCN(CCCCN(CC#N)C(=O)OCc3ccccc3)CC2		0	0	0	0.0810811	0.111111	0.125	118.365	-118.365						0	0	0	-0.0640114	-0.111111	-0.166667	-0.267492		0	0	0	0	0	0	0
PathogenBox_PlateC	A03	MMV676204	ONCHOCERCIASIS	Fc1ccc(cc1)C(=O)N(CCNc2ccccc2)c3ccccc3		1	0	1	0.135135	0.166667	0.25	126.166	-126.166						0.25	0	0.25	-0.00142248	-0.0416667	0	-0.339969		0.25	0	0.25	0	0	0	0
PathogenBox_PlateC	A04	MMV687239	TUBERCULOSIS	CC(C)(C(=O)Nc1ccc(F)cc1)n2cc(cn2)c3ccccc3F		0	0	0	0.135135	0.111111	0	128.318	-128.318						0	0	0	-0.00142248	-0.111111	-0.333333	-0.359956		0	0	0	0	0	0	0
PathogenBox_PlateC	A05	MMV688122	TUBERCULOSIS	Cc1cccc(n1)c2nc(Nc3ccncn3)c4sccc4n2		1	3	4	0.405405	0.666667	0.75	39.9131	-39.9131						0.25	0.75	1	0.311522	0.583333	0.666667	0.461372		0.25	0.75	1	0.311522	0.583333	0.666667	0.461372
PathogenBox_PlateC	A06	MMV688852	TOXOPLASMOSIS	CC(C)(C)n1nc(Cc2ccc(F)c(Cl)c2)c2c(N)ncnc12		0	0	0	0.0810811	0.166667	0.1875	98.679	-98.679						0	0	0	-0.0640114	-0.0416667	-0.0833333	-0.0845963		0	0	0	0	0	0	0
PathogenBox_PlateC	A07	MMV687145	TUBERCULOSIS	CCCCS(=O)(=O)Nc1ccc2cnn(C)c2c1		0	0	0	0.0810811	0.111111	0.0625	140.975	-140.975						0	0	0	-0.0640114	-0.111111	-0.25	-0.477548		0	0	0	0	0	0	0
PathogenBox_PlateC	A08	MMV688327	TUBERCULOSIS	CC(=O)NCC1CN(C(=O)O1)c2ccc(c(F)c2)c3ccc(CNCc4cn[nH]n4)cc3	Radezolid	0	0	0	0.05	0.0555556	0	107.911	-107.911						0	0	0	-0.1	-0.180556	-0.333333	-0.170365		0	0	0	0	0	0	0
PathogenBox_PlateC	A09	MMV008439	MALARIA	COc1ccc(CN2CCOc3ccc(cc3C2)C(C)(O)CN(C)C)cc1C		0	0	1	0.1	0.0555556	0	119.876	-119.876						0	0	0.25	-0.0421053	-0.180556	-0.333333	-0.281525		0	0	0.25	0	0	0	0
PathogenBox_PlateC	A10	MMV595321	KINETOPLASTIDS	CC1=C(C)C(NC(N2N=C(C)C=C2NC(C3=CC=C(S(=O)(N(CC)CC)=O)C=C3)=O)=N1)=O		0	0	0	0.1	0	0	80.6157	-80.6157						0	0	0	-0.0421053	-0.25	-0.333333	0.0832218		0	0	0	0	0	0	0.0832218
PathogenBox_PlateC	A11	MMV687747	TUBERCULOSIS	Cc1cc(OCC(=O)NCc2ccccc2)c3cc(Br)ccc3n1		0	0	0	0.1	0.0555556	0.0625	110.522	-110.522						0	0	0	-0.0421053	-0.180556	-0.25	-0.194625		0	0	0	0	0	0	0
PathogenBox_PlateC	B02	MMV020388	MALARIA	CC(Nc1cc(Cl)ccc1N2CCOCC2)C(=O)N3CCCC(C)C3		0	0	0	0.15	0.222222	0.375	137.267	-137.267						0	0	0	0.0157895	0.0277778	0.166667	-0.443102		0	0	0	0.0157895	0.0277778	0.166667	0
PathogenBox_PlateC	B03	MMV688547	KINETOPLASTIDS	COc1ccc(cc1c2cn(nn2)c3cccc(c3)C4=NCCN4)C5=NCCN5		0	0	0	0.1	0.111111	0.25	85.9012	-85.9012						0	0	0	-0.0421053	-0.111111	0	0.0341165		0	0	0	0	0	0	0.0341165
PathogenBox_PlateC	B04	MMV688466	TUBERCULOSIS	Cn1ccnc1CNCCS(=O)(=O)c2cccc(Nc3ccc(cn3)c4cccc(F)c4)c2		0	0	0	0.1	0.0555556	0.125	113.656	-113.656						0	0	0	-0.0421053	-0.180556	-0.166667	-0.22374		0	0	0	0	0	0	0
PathogenBox_PlateC	B05	MMV687749	TUBERCULOSIS	C([C@@H]1CN(CCN1)c2nccc(Oc3ccc(cc3)n4ccnc4)n2)c5ccccc5		0	0	0	0.1	0.111111	0.1875	94.4327	-94.4327						0	0	0	-0.0421053	-0.111111	-0.0833333	-0.0451459		0	0	0	0	0	0	0
PathogenBox_PlateC	B06	MMV688846	TUBERCULOSIS	Cc1ccccc1CN2CCC(O)(CC2)c3ccc(Cl)c(c3)C(F)(F)F		2	0	1	0.1	0.0555556	0.1875	71.0864	-71.0864						0.5	0	0.25	-0.0421053	-0.180556	-0.0833333	0.171755		0.5	0	0.25	0	0	0	0.171755
PathogenBox_PlateC	B07	MMV054312	TUBERCULOSIS	CC(=O)N1CCc2cc3nc(C)cc(C)c3cc12		0	0	0	0.2	0.111111	0.0625	111.762	-111.762						0	0	0	0.0736842	-0.111111	-0.25	-0.206144		0	0	0	0.0736842	0	0	0
PathogenBox_PlateC	B08	MMV689060	KINETOPLASTIDS	Clc1ccc(CN2CCN(CC2)C3=NCCN3)cc1Cl		1	0	0	0.1	0.0555556	0.125	81.8942	-81.8942						0.25	0	0	-0.0421053	-0.180556	-0.166667	0.0713444		0.25	0	0	0	0	0	0.0713444
PathogenBox_PlateC	B09	MMV689061	KINETOPLASTIDS	CC1=C(F)C=CC=C1CN2CCCC(CC3=NC(C4=CC=C(NC(C)=O)C=C4)=NO3)C2		0	0	0	0.1	0.0555556	0.1875	117.382	-117.382						0	0	0	-0.0421053	-0.180556	-0.0833333	-0.258354		0	0	0	0	0	0	0
PathogenBox_PlateC	B10	MMV689028	KINETOPLASTIDS	O=C(N1CCN(CC2=CC=C(NS(=O)(C3=CC=C(C)C=C3)=O)C=C2)CC1)C4=CC(C#N)=CC=C4		0	1	1	0.05	0.0555556	0.0625	130.799	-130.799						0	0.25	0.25	-0.1	-0.180556	-0.25	-0.383014		0	0.25	0.25	0	0	0	0
PathogenBox_PlateC	B11	MMV688371	KINETOPLASTIDS	NCCN(C(=O)c1ccc(Cl)cc1Cl)c2ccc(OCc3ccc(Cl)cc3)cc2		0	0	0	0.4	0.333333	0.3125	22.7049	-22.7049						0	0	0	0.305263	0.166667	0.0833333	0.621246		0	0	0	0.305263	0.166667	0.0833333	0.621246
PathogenBox_PlateC	C02	MMV688508	TUBERCULOSIS	CC(=O)NCC1CN(C(=O)O1)c2ccc(c(F)c2)c3ccc(CO)cc3		0	1	0	0.1	0.111111	0.0625	137.652	-137.652						0	0.25	0	-0.0421053	-0.111111	-0.25	-0.446681		0	0.25	0	0	0	0	0
PathogenBox_PlateC	C03	MMV688283	KINETOPLASTIDS	CN1CCN(CC1)S(=O)(=O)c2ccc(cc2)c3ccc4c(Nc5ncc(Cl)cn5)ccnc4c3		2	4	4	0.6	0.611111	0.625	32.4102	-32.4102						0.5	1	1	0.536842	0.513889	0.5	0.531078		0.5	1	1	0.536842	0.513889	0.5	0.531078
PathogenBox_PlateC	C04	MMV687243	TUBERCULOSIS	NC(=O)c1cc(Br)ccc1OCCOc2ccccc2		1	1	2	0	0	0	110.146	-110.146						0.25	0.25	0.5	-0.157895	-0.25	-0.333333	-0.191132		0.25	0.25	0.5	0	0	0	0
PathogenBox_PlateC	C05	MMV687730	TUBERCULOSIS	CCCCOC(=O)Nc1cc2nc([nH]c2cc1N3CCCC3)C4CCCCC4		3	4	4	0.15	0.388889	0.5625	131.619	-131.619						0.75	1	1	0.0157895	0.236111	0.416667	-0.390627		0.75	1	1	0.0157895	0.236111	0.416667	0
PathogenBox_PlateC	C06	MMV687251	TUBERCULOSIS	CN1C(=O)N(C)c2nsc(c2C1=O)S(=O)(=O)C		4	4	4	1	1	1	-0.448452	0.448452						1	1	1	1	1	1	0.836353		1	1	1	1	1	1	0.836353
PathogenBox_PlateC	C07	MMV687254	TUBERCULOSIS	CCCCc1ccc(nc1)C(=O)Nc2nccc3ccccc23		1	0	1	0.1	0.166667	0.1875	94.2269	-94.2269						0.25	0	0.25	-0.0421053	-0.0416667	-0.0833333	-0.0432333		0.25	0	0.25	0	0	0	0
PathogenBox_PlateC	C08	MMV688509	TOXOPLASMOSIS	Fc1ccc(cc1)-c1[nH]c(cc1-c1ccncc1)C1CCN(CC1)C(=O)OCc1ccccc1		0	0	0	0.1	0.222222	0.1875	124.178	-124.178						0	0	0	-0.0421053	0.0277778	-0.0833333	-0.321499		0	0	0	0	0.0277778	0	0
PathogenBox_PlateC	C09	MMV688361	KINETOPLASTIDS	C1CN=C(N1)c2ccc(cc2)c3cc(on3)c4cccc(c4)C5=NCCN5		0	0	0	0.1	0.111111	0.125	115	-115						0	0	0	-0.0421053	-0.111111	-0.166667	-0.236229		0	0	0	0	0	0	0
PathogenBox_PlateC	C10	MMV689029	KINETOPLASTIDS	O=C(N1CCN(CC2=CC=C(NS(=O)(C3=CC=C(OC)C=C3)=O)C=C2)CC1)C4=CC(C#N)=CC=C4		0	0	1	0.1	0.111111	0.1875	143.621	-143.621						0	0	0.25	-0.0421053	-0.111111	-0.0833333	-0.502137		0	0	0.25	0	0	0	0
PathogenBox_PlateC	C11	MMV022236	MALARIA	CCN(CC)CCCN1CCN(CC1)C(=O)c2cccc(c2)c3noc(n3)C(F)(F)F		0	0	1	0.2	0.111111	0.25	97.3106	-97.3106						0	0	0.25	0.0736842	-0.111111	0	-0.0718826		0	0	0.25	0.0736842	0	0	0
PathogenBox_PlateC	D02	MMV688410	KINETOPLASTIDS	CN(C)CC(=O)NCCN1C(c2ccccc2)c3cc(Cl)ccc3N=C1C		0	0	0	0.35	0.333333	0.375	112.917	-112.917						0	0	0	0.247368	0.166667	0.166667	-0.216877		0	0	0	0.247368	0.166667	0.166667	0
PathogenBox_PlateC	D03	MMV676048	KINETOPLASTIDS	Clc1ccc(Cl)c(CO[C@H]2CCCC[C@@H]2n3ccnc3)c1		0	0	0	0.2	0.166667	0.25	109.128	-109.128						0	0	0	0.0736842	-0.0416667	0	-0.181676		0	0	0	0.0736842	0	0	0
PathogenBox_PlateC	D04	MMV687703	TUBERCULOSIS	COc1cccc(n1)c2nc3c(cccc3n2CC4CCCN4)N5CCCC5		4	4	4	0.35	0.777778	0.75	158.278	-158.278						1	1	1	0.247368	0.722222	0.666667	-0.6383		1	1	1	0.247368	0.722222	0.666667	0
PathogenBox_PlateC	D05	MMV687248	TUBERCULOSIS	Nc1nc2ccc(cc2[nH]1)c3cncc(Oc4ccc(F)cc4)c3		2	1	1	0.3	0.555556	0.6875	110.725	-110.725						0.5	0.25	0.25	0.189474	0.444444	0.583333	-0.196506		0.5	0.25	0.25	0.189474	0.444444	0.583333	0
PathogenBox_PlateC	D06	MMV688125	TUBERCULOSIS	CCCc1ccc(cc1)S(=O)(=O)Nc2ccc(CN3CCN(CC4CC4)CC3)cc2		0	0	0	0.15	0.166667	0.375	108.042	-108.042						0	0	0	0.0157895	-0.0416667	0.166667	-0.171581		0	0	0	0.0157895	0	0.166667	0
PathogenBox_PlateC	D07	MMV687188	TUBERCULOSIS	COc1ccc2nc(C)cc(OCC(=O)Nc3ccccc3OC)c2c1		0	0	0	0.2	0.277778	0.25	107.726	-107.726						0	0	0	0.0736842	0.0972222	0	-0.168651		0	0	0	0.0736842	0.0972222	0	0
PathogenBox_PlateC	D08	MMV690103	KINETOPLASTIDS	C[C@@H](N(C)c1ncc2c(N)nc(N)nc2n1)c3ccc4CCCCc4c3		0	0	0	0.2	0.277778	0.4375	39.0529	-39.0529						0	0	0	0.0736842	0.0972222	0.25	0.469363		0	0	0	0.0736842	0.0972222	0.25	0.469363
PathogenBox_PlateC	D09	MMV688124	TUBERCULOSIS	CCc1ccc(cc1)S(=O)(=O)Nc2cc(CN3CCN(CCC(C)C)CC3)ccc2C		1	2	4	0.25	0.444444	0.5	85.7882	-85.7882						0.25	0.5	1	0.131579	0.305556	0.333333	0.0351666		0.25	0.5	1	0.131579	0.305556	0.333333	0.0351666
PathogenBox_PlateC	D10	MMV688845	TUBERCULOSIS	O=C(Nc1ccccc1N2CCOCC2)[C@@H](Cc3ccccc3)NC(=O)c4cccs4		0	0	0	0.2	0.166667	0.1875	128.93	-128.93						0	0	0	0.0736842	-0.0416667	-0.0833333	-0.365644		0	0	0	0.0736842	0	0	0
PathogenBox_PlateC	D11	MMV1030799	MALARIA	CCCn1c(NC(=O)c2ccc3ccccc3n2)nc4ccccc14		1	0	0	0.2	0.277778	0.3125	5.67624	-5.67624						0.25	0	0	0.0736842	0.0972222	0.0833333	0.779452		0.25	0	0	0.0736842	0.0972222	0.0833333	0.779452
PathogenBox_PlateC	E02	MMV675994	CRYPTOSPORIDIOSIS	Clc1ccc(cc1)n2cc(COc3ccnc4ccccc34)nn2		0	0	0	0.105263	0.388889	0.3125	103.019	-103.019						0	0	0	-0.0360111	0.236111	0.0833333	-0.124914		0	0	0	0	0.236111	0.0833333	0
PathogenBox_PlateC	E03	MMV676057	KINETOPLASTIDS	CC(C)(C)OC(=O)N1CCN(CC1)c2cc(n[nH]2)c3ccc(Oc4ccccc4)cc3		0	0	0	0.0526316	0.166667	0.25	66.0621	-66.0621						0	0	0	-0.0969529	-0.0416667	0	0.218433		0	0	0	0	0	0	0.218433
PathogenBox_PlateC	E04	MMV687699	TUBERCULOSIS	FC(F)(F)c1nc2ccccn2c1C(=O)NCc3cc(Cl)cc(Cl)c3		0	1	0	0.157895	0.333333	0.3125	93.7194	-93.7194						0	0.25	0	0.0249307	0.166667	0.0833333	-0.0385187		0	0.25	0	0.0249307	0.166667	0.0833333	0
PathogenBox_PlateC	E05	MMV687146	TUBERCULOSIS	Cc1cc(C)c2cc([nH]c2c1)C(=O)NC3CCCCCCC3		0	1	0	0.315789	0.333333	0.4375	123.95	-123.95						0	0.25	0	0.207756	0.166667	0.25	-0.319378		0	0.25	0	0.207756	0.166667	0.25	0
PathogenBox_PlateC	E06	MMV687696	TUBERCULOSIS	CCc1nc2ccc(Cl)cn2c1C(=O)NCc3ccc(cc3)N4CCC(CC4)c5ccc(OC(F)(F)F)cc5		1	0	0	0.105263	0.0555556	0	66.8257	-66.8257						0.25	0	0	-0.0360111	-0.180556	-0.333333	0.211338		0.25	0	0	0	0	0	0.211338
PathogenBox_PlateC	E07	MMV687170	TUBERCULOSIS	COc1ccc(Cn2cnc3c(nc(Cl)nc23)c4occc4)cc1		0	0	0	0.105263	0.0555556	0.125	98.6017	-98.6017						0	0	0	-0.0360111	-0.180556	-0.166667	-0.0838783		0	0	0	0	0	0	0
PathogenBox_PlateC	E08	MMV690102	KINETOPLASTIDS	COc1ccc(Oc2ccc(cc2)[C@@H](C)N(C)c3ncc4c(N)nc(N)nc4n3)cc1		4	4	4	0.526316	0.5	0.5	4.73538	-4.73538						1	1	1	0.451524	0.375	0.333333	0.788193		1	1	1	0.451524	0.375	0.333333	0.788193
PathogenBox_PlateC	E09	MMV689709	KINETOPLASTIDS	O=C(N1CC(C2=CC(NC)=CC(C)=N2)OCC1)C3=NNC4=C3C=CC=C4		0	0	0	0.157895	0.166667	0.125	123.493	-123.493						0	0	0	0.0249307	-0.0416667	-0.166667	-0.315136		0	0	0	0.0249307	0	0	0
PathogenBox_PlateC	E10	MMV021375	MALARIA	CC(C)CNc1cc(nc2c([nH]nc12)-c1ccccc1)C		0	0	0	0.105263	0.111111	0.0625	92.7068	-92.7068						0	0	0	-0.0360111	-0.111111	-0.25	-0.0291109		0	0	0	0	0	0	0
PathogenBox_PlateC	E11	MMV1029203	MALARIA	CNC(=O)CNc1nc(nc2scc(c3ccccc3)c12)c4ccccn4		0	0	0	0.105263	0.111111	0.125	89.9902	-89.9902						0	0	0	-0.0360111	-0.111111	-0.166667	-0.00387254		0	0	0	0	0	0	0
PathogenBox_PlateC	F02	MMV676053	CRYPTOSPORIDIOSIS	COc1cc(NC(=O)CC2=NN(C)C(=O)c3ccccc23)ccc1Cl		0	0	0	0.105263	0.111111	0.0625	104.061	-104.061						0	0	0	-0.0360111	-0.111111	-0.25	-0.134602		0	0	0	0	0	0	0
PathogenBox_PlateC	F03	MMV688179	KINETOPLASTIDS	NC(=N)Nc1ccc(c(Cl)c1)c2oc(cc2)c3ccc(NC(=N)N)cc3Cl		0	0	0	0.0526316	0.111111	0.125	61.6841	-61.6841						0	0	0	-0.0969529	-0.111111	-0.166667	0.259107		0	0	0	0	0	0	0.259107
PathogenBox_PlateC	F04	MMV023969	TUBERCULOSIS	C(Nc1cccnc1)c2ccc(s2)c3cc4ccncc4cc3OC5CCNCC5		3	3	4	0.136364	0.45	0.555556	14.8115	-14.8115						0.75	0.75	1	0	0.3125	0.407407	0.694579		0.75	0.75	1	0	0.3125	0.407407	0.694579
PathogenBox_PlateC	F05	MMV687138	TUBERCULOSIS	NC(=O)c1cc(ccc1OCCOc2ccccc2)c3ccsc3		0	0	0	0.157895	0.111111	0	89.537	-89.537						0	0	0	0.0249307	-0.111111	-0.333333	0.000338174		0	0	0	0.0249307	0	0	0.000338174
PathogenBox_PlateC	F06	MMV688262	TUBERCULOSIS	CC1(COc2ccc(cc2)N3CCC(CC3)Oc4ccc(OC(F)(F)F)cc4)Cn5cc(nc5O1)N(=O)=O	Delamanid	0	0	0	0.157895	0.111111	0.0625	110.477	-110.477						0	0	0	0.0249307	-0.111111	-0.25	-0.194203		0	0	0	0.0249307	0	0	0
PathogenBox_PlateC	F07	MMV687189	TUBERCULOSIS	COc1ccc2nc(C)cc(OCC(=O)NCc3ccccc3)c2c1		0	0	0	0.0526316	0.0555556	0	74.7405	-74.7405						0	0	0	-0.0969529	-0.180556	-0.333333	0.137806		0	0	0	0	0	0	0.137806
PathogenBox_PlateC	F08	MMV687807	TUBERCULOSIS	Oc1ccc(Cl)cc1C(=O)Nc2ccc(c(c2)C(F)(F)F)C(F)(F)F		4	4	4	1	1	1	35.4318	-35.4318						1	1	1	1	1	1	0.503006		1	1	1	1	1	1	0.503006
PathogenBox_PlateC	F09	MMV676478	TUBERCULOSIS	O=C(C1CCN(CC1)c2nnc(s2)n3cccc3)N4CCC(Cc5ccccc5)CC4		1	1	0	0.0526316	0.111111	0	103.434	-103.434						0.25	0.25	0	-0.0969529	-0.111111	-0.333333	-0.128771		0.25	0.25	0	0	0	0	0
PathogenBox_PlateC	F10	MMV062221	MALARIA	Cc1cc(C)nc(n1)n2nc(C)cc2Nc3ccccc3		2	1	4	0.0526316	0.277778	0.25	55.5551	-55.5551						0.5	0.25	1	-0.0969529	0.0972222	0	0.316049		0.5	0.25	1	0	0.0972222	0	0.316049
PathogenBox_PlateC	F11	MMV688921	DENGUE	OC[C@H]1O[C@H](C(O)[C@H]1O)n2c3ccc(Cl)cc3c4c(ncnc24)c5oc6ccccc6c5		0	0	0	0.157895	0.111111	0	93.8719	-93.8719						0	0	0	0.0249307	-0.111111	-0.333333	-0.0399353		0	0	0	0.0249307	0	0	0
PathogenBox_PlateC	G02	MMV676191	CRYPTOSPORIDIOSIS	CC(C)C(Oc1cccc2ccccc12)C(=O)O		0	0	0	0	0	0.0555556	107.724	-107.724						0	0	0	-0.157895	-0.25	-0.259259	-0.168632		0	0	0	0	0	0	0
PathogenBox_PlateC	G03	MMV675993	CRYPTOSPORIDIOSIS	COc1ccc(cc1OC)c2nn(C(C)C)c3ncnc(N)c23		0	0	0	0.05	0.0555556	0.0555556	95.2445	-95.2445						0	0	0	-0.1	-0.180556	-0.259259	-0.0526878		0	0	0	0	0	0	0
PathogenBox_PlateC	G04	MMV021660	TUBERCULOSIS	Cc1cc(NCCc2ccccc2)nc(NC(=N)Nc3ccc(Cl)cc3)n1		4	4	4	1	1	1	8.49962	-8.49962						1	1	1	1	1	1	0.753221		1	1	1	1	1	1	0.753221
PathogenBox_PlateC	G05	MMV688417	TOXOPLASMOSIS	CC(C)n1nc(-c2cc3c(Cl)cccc3[nH]2)c2c(N)ncnc12		4	4	4	0.55	0.666667	1	54.2605	-54.2605						1	1	1	0.478947	0.583333	1	0.328077		1	1	1	0.478947	0.583333	1	0.328077
PathogenBox_PlateC	G06	MMV687273	TUBERCULOSIS	CC(=CCC\C(=C/CNCCNC1C2CC3CC(CC1C3)C2)\C)C		4	4	4	1	1	1	13.4938	-13.4938						1	1	1	1	1	1	0.706822		1	1	1	1	1	1	0.706822
PathogenBox_PlateC	G07	MMV687180	TUBERCULOSIS	CCc1ccc(cc1)[C@@H]2C[C@@H](n3ncc(C(=O)NCc4ccc(OC)cc4)c3N2)C(F)(F)F		1	1	0	0.1	0.111111	0.0555556	99.4589	-99.4589						0.25	0.25	0	-0.0421053	-0.111111	-0.259259	-0.0918422		0.25	0.25	0	0	0	0	0
PathogenBox_PlateC	G08	MMV1088520	MALARIA	CC(C)N(Cc1ccccn1)Cc2csc(n2)c3oc(C)cc3		0	1	0	0.05	0.222222	0.388889	84.4011	-84.4011						0	0.25	0	-0.1	0.0277778	0.185185	0.0480533		0	0.25	0	0	0.0277778	0.185185	0.0480533
PathogenBox_PlateC	G09	MMV688891	TUBERCULOSIS	COc1cc(Br)cc2C=C(C(=O)Nc3cccc(c3)C(F)(F)F)C(=O)Oc12		0	0	0	0.1	0.0555556	0.0555556	90.5892	-90.5892						0	0	0	-0.0421053	-0.180556	-0.259259	-0.00943742		0	0	0	0	0	0	0
PathogenBox_PlateC	G10	MMV023370	MALARIA	Nc1ncc(cc1c2nc3cc(Cl)cnc3[nH]2)c4cn[nH]c4		0	0	0	0	0	0.0555556	94.3923	-94.3923						0	0	0	-0.157895	-0.25	-0.259259	-0.0447704		0	0	0	0	0	0	0
PathogenBox_PlateC	G11	MMV688703	TOXOPLASMOSIS	CN1CCC(CC1)c1cc(c([nH]1)-c1ccc(F)cc1)-c1ccncc1		0	0	0	0	0.0555556	0.111111	94.5561	-94.5561						0	0	0	-0.157895	-0.180556	-0.185185	-0.046292		0	0	0	0	0	0	0
PathogenBox_PlateC	H02	MMV675969	ONCHOCERCIASIS	CC(C)(C)c1ccc(N[C@@H]2CCCC[C@H]2NC(=O)c3occc3)cc1		0	0	0	0	0	0.111111	117.357	-117.357						0	0	0	-0.157895	-0.25	-0.185185	-0.258125		0	0	0	0	0	0	0
PathogenBox_PlateC	H03	MMV688313	SCHISTOSOMIASIS	COc1ccc(cc1OC)-c1nnc2ccc(cn12)-c1cccc(c1)C(C)C		0	2	0	0.1	0.166667	0.277778	14.6518	-14.6518						0	0.5	0	-0.0421053	-0.0416667	0.037037	0.696063		0	0.5	0	0	0	0.037037	0.696063
PathogenBox_PlateC	H04	MMV687172	TUBERCULOSIS	O=C(C1CCN(CC1)c2cc(ncn2)n3cccc3)N4CCc5ccccc5C4		0	0	1	0.05	0.111111	0.333333	96.4487	-96.4487						0	0	0.25	-0.1	-0.111111	0.111111	-0.0638758		0	0	0.25	0	0	0.111111	0
PathogenBox_PlateC	H05	MMV688844	TUBERCULOSIS	COc1ccc2nccc(NC(=O)C3CCN(CCc4ccc(Cl)cc4)CC3)c2n1		0	0	0	0.05	0.0555556	0.111111	77.2013	-77.2013						0	0	0	-0.1	-0.180556	-0.185185	0.114944		0	0	0	0	0	0	0.114944
PathogenBox_PlateC	H06	MMV1198433	SCHISTOSOMIASIS	CC(C)c1ccc(NC(=O)COC2=CC(=C(C#N)C(=O)N2C)C)cc1		0	0	0	0.1	0.0555556	0	82.3189	-82.3189						0	0	0	-0.0421053	-0.180556	-0.333333	0.067398		0	0	0	0	0	0	0.067398
PathogenBox_PlateC	H07	MMV024311	TUBERCULOSIS	Cc1ccc2[nH]c(C3CCCNC3)c(c4ccncc4)c2c1		0	0	0	0	0	0.111111	75.2113	-75.2113						0	0	0	-0.157895	-0.25	-0.185185	0.133432		0	0	0	0	0	0	0.133432
PathogenBox_PlateC	H08	MMV1019989	MALARIA	CCc1ccc(cc1)C(NCc2nc(N)nc(n2)N(C)C)C(C)C		0	0	0	0	0	0.111111	99.2201	-99.2201						0	0	0	-0.157895	-0.25	-0.185185	-0.0896229		0	0	0	0	0	0	0
PathogenBox_PlateC	H09	MMV1037162	MALARIA	CCNC(=O)C(C)Nc1nc(nc2sc(C)c(C)c12)c3cccnc3		0	0	0	0	0	0.111111	81.9243	-81.9243						0	0	0	-0.157895	-0.25	-0.185185	0.0710645		0	0	0	0	0	0	0.0710645
PathogenBox_PlateC	H10	MMV689437	KINETOPLASTIDS	CC(N(C)c1ncc2c(N)nc(N)nc2n1)c3cc(Cl)cc(Cl)c3		0	0	0	0	0	0.166667	42.1988	-42.1988						0	0	0	-0.157895	-0.25	-0.111111	0.440136		0	0	0	0	0	0	0.440136
PathogenBox_PlateC	H11	MMV688955	TOXOPLASMOSIS	Cc1cc(NC(=O)c2ccc(Oc3ccc(Cl)cc3O)o2)no1		0	0	0	0.1	0	0.111111	99.634	-99.634						0	0	0	-0.0421053	-0.25	-0.185185	-0.0934688		0	0	0	0	0	0	0
PathogenBox_PlateD	A02	MMV026468	MALARIA	OCc1ccc(cc1)c2cncc(Nc3cccc(Cl)c3)c2		0	0	0	0.1	0.0810811	0.151515	99.456	-99.456						0	0	0	-0.0421053	-0.148649	-0.131313	-0.0918149		0	0	0	0	0	0	0
PathogenBox_PlateD	A03	MMV020670	MALARIA	COc1ccc(cc1)c2cncc3ccc(nc23)C(=O)NCCCn4ccnc4		1	0	0	0	0.027027	0.030303	121.26	-121.26						0.25	0	0	-0.157895	-0.216216	-0.292929	-0.294387		0.25	0	0	0	0	0	0
PathogenBox_PlateD	A04	MMV023953	MALARIA	O=C(Nc1cccc(c1)c2ccc(NCCCN3CCCC3)nc2)c4ccccc4		1	2	4	0.2	0.459459	0.515152	67.7724	-67.7724						0.25	0.5	1	0.0736842	0.324324	0.353535	0.202544		0.25	0.5	1	0.0736842	0.324324	0.353535	0.202544
PathogenBox_PlateD	A05	MMV010576	MALARIA	COc1cc(ccc1O)c2cc(cnc2N)c3ccc(cc3)S(=O)(=O)C		2	1	1	0.1	0.189189	0.151515	139.24	-139.24						0.5	0.25	0.25	-0.0421053	-0.0135135	-0.131313	-0.461427		0.5	0.25	0.25	0	0	0	0
PathogenBox_PlateD	A06	MMV032967	MALARIA	FC(F)(F)c1cccc(c1)c2nc3c(NCc4ccncc4)nccc3[nH]2		0	0	0	0.15	0.0810811	0.151515	90.7105	-90.7105						0	0	0	0.0157895	-0.148649	-0.131313	-0.0105646		0	0	0	0.0157895	0	0	0
PathogenBox_PlateD	A07	MMV031011	MALARIA	CNC(=O)C1Cc2c([nH]c3cc(Cl)ccc23)C4(CCN(CCc5ccccc5)CC4)N1		0	0	0	0.1	0.513514	0.393939	13.4401	-13.4401						0	0	0	-0.0421053	0.391892	0.191919	0.707321		0	0	0	0	0.391892	0.191919	0.707321
PathogenBox_PlateD	A08	MMV688178	SCHISTOSOMIASIS	O(c1ccccc1)c1ccc(cc1)-c1cncc(n1)-c1ccc2[nH]ccc2c1		0	0	2	0.6	1	1	3.06398	-3.06398						0	0	0.5	0.536842	1	1	0.803721		0	0	0.5	0.536842	1	1	0.803721
PathogenBox_PlateD	A09	MMV688362	KINETOPLASTIDS	COc1cc(cc2cc(oc12)c3ccc(cc3)C4=NCCN4)C5=NCCN5		0	0	0	0.1	0.027027	0.030303	4.86462	-4.86462						0	0	0	-0.0421053	-0.216216	-0.292929	0.786992		0	0	0	0	0	0	0.786992
PathogenBox_PlateD	A10	MMV687706	KINETOPLASTIDS	C1CN(CCN1)c2cc(n[nH]2)c3ccc(Oc4ccccc4)cc3		2	2	2	0.05	0.15	0.444444	25.2207	-25.2207						0.5	0.5	0.5	-0.1	-0.0625	0.259259	0.597873		0.5	0.5	0.5	0	0	0.259259	0.597873
PathogenBox_PlateD	A11	MMV026356	MALARIA	CCn1ncc2c(NC3CCOCC3)c(CNC(=O)c4ccnn4C)c(C)nc12		0	0	0	0.05	0.0810811	0.030303	92.476	-92.476						0	0	0	-0.1	-0.148649	-0.292929	-0.0269673		0	0	0	0	0	0	0
PathogenBox_PlateD	B02	MMV011511	MALARIA	COc1ccc(CCN2CCC(CC2)NCc3cccc(c3)N(C)C)cc1		0	0	0	0	0.027027	0.030303	98.58	-98.58						0	0	0	-0.157895	-0.216216	-0.292929	-0.0836763		0	0	0	0	0	0	0
PathogenBox_PlateD	B03	MMV007625	MALARIA	Cc1cc(C)n(n1)c2ccc(NC(=O)C3CCN(Cc4cnc(C)s4)CC3)cc2		0	0	0	0.1	0.135135	0.151515	135.062	-135.062						0	0	0	-0.0421053	-0.0810811	-0.131313	-0.422613		0	0	0	0	0	0	0
PathogenBox_PlateD	B04	MMV007471	MALARIA	COc1cc(OC)cc(c1)C(=O)NCC2Cc3cc(Cl)cc(c3O2)c4ccncc4		0	0	0	0.1	0.189189	0.151515	152.802	-152.802						0	0	0	-0.0421053	-0.0135135	-0.131313	-0.587428		0	0	0	0	0	0	0
PathogenBox_PlateD	B05	MMV024829	MALARIA	CC(C)CN1CCC(CC1)N(C)c2cc(NC(=O)c3cccc(C)c3)ccn2		0	0	0	0.1	0.243243	0.212121	125.476	-125.476						0	0	0	-0.0421053	0.0540541	-0.0505051	-0.333558		0	0	0	0	0.0540541	0	0
PathogenBox_PlateD	B06	MMV045105	KINETOPLASTIDS	C1CN(CCO1)c2cc(n[nH]2)c3ccc(Oc4ccccc4)cc3		0	0	0	0.15	0.297297	0.151515	111.857	-111.857						0	0	0	0.0157895	0.121622	-0.131313	-0.207029		0	0	0	0.0157895	0.121622	0	0
PathogenBox_PlateD	B07	MMV022029	MALARIA	CN1CCC(CC1)NCc2cccc(c2)c3ccc(cc3)S(=O)(=O)NCc4ccccc4		0	2	4	0.6	0.783784	0.939394	19.2103	-19.2103						0	0.5	1	0.536842	0.72973	0.919192	0.653713		0	0.5	1	0.536842	0.72973	0.919192	0.653713
PathogenBox_PlateD	B08	MMV676064	ONCHOCERCIASIS	CC(=O)N(CCN(C(=O)c1ccc(F)cc1)c2ccccc2)c3ccccc3		1	0	0	0.1	0.027027	0.0909091	116.719	-116.719						0.25	0	0	-0.0421053	-0.216216	-0.212121	-0.252198		0.25	0	0	0	0	0	0
PathogenBox_PlateD	B09	MMV688180	KINETOPLASTIDS	Cc1nn(C)c(C)c1NS(=O)(=O)c2c(Cl)cc(cc2Cl)c3ccnc(c3)N4CCNCC4		0	0	0	0.15	0.0810811	0.151515	121.284	-121.284						0	0	0	0.0157895	-0.148649	-0.131313	-0.294609		0	0	0	0.0157895	0	0	0
PathogenBox_PlateD	B10	MMV024035	MALARIA	O=C(Nc1ccccc1)c2ccc(s2)c3cc4ccncc4cc3OC5CCNCC5		0	0	0	0.15	0.459459	0.454545	-18.0627	18.0627						0	0	0	0.0157895	0.324324	0.272727	1		0	0	0	0.0157895	0.324324	0.272727	1
PathogenBox_PlateD	B11	MMV688941	TUBERCULOSIS	COc1cc(CN2CCC3(CC2)C=Cc4ccccc34)cc5OCOc15		1	1	0	0.1	0.135135	0.272727	73.9107	-73.9107						0.25	0.25	0	-0.0421053	-0.0810811	0.030303	0.145515		0.25	0.25	0	0	0	0.030303	0.145515
PathogenBox_PlateD	C02	MMV020291	MALARIA	CC(N1CCN(CC1)S(=O)(=O)c2ccc(cc2)C(C)(C)C)C(=O)N3CCCC3		1	0	0	0.05	0.027027	0.0909091	108.883	-108.883						0.25	0	0	-0.1	-0.216216	-0.212121	-0.179397		0.25	0	0	0	0	0	0
PathogenBox_PlateD	C03	MMV006833	MALARIA	Cc1cc(Cl)c(cc1OCC(=O)NC2CCCCC2)S(=O)(=O)N3CCCC3		0	0	0	0.1	0.189189	0.212121	111.483	-111.483						0	0	0	-0.0421053	-0.0135135	-0.0505051	-0.203549		0	0	0	0	0	0	0
PathogenBox_PlateD	C04	MMV026490	MALARIA	O=C(NCCc1ccccc1)c2cc(cnc2NCC3CC3)c4cccnc4		0	2	0	0.2	0.513514	0.575758	85.9169	-85.9169						0	0.5	0	0.0736842	0.391892	0.434343	0.0339713		0	0.5	0	0.0736842	0.391892	0.434343	0.0339713
PathogenBox_PlateD	C05	MMV687246	MALARIA	CN1CCN(CC1)S(=O)(=O)c2ccc(cc2)c3ccc4c(Nc5ccc6nn[nH]c6c5)ccnc4c3		0	0	0	0.1	0.135135	0.0909091	152.127	-152.127						0	0	0	-0.0421053	-0.0810811	-0.212121	-0.581158		0	0	0	0	0	0	0
PathogenBox_PlateD	C06	MMV676162	KINETOPLASTIDS	OC(=O)c1cccc2oc(nc12)c3ccccc3NC(=O)c4ccccc4		0	0	0	0.05	0.027027	0.030303	54.1342	-54.1342						0	0	0	-0.1	-0.216216	-0.292929	0.32925		0	0	0	0	0	0	0.32925
PathogenBox_PlateD	C07	MMV024114	MALARIA	Cc1ccc(cc1)S(=O)(=O)n2cc(c3ccnc(N)c3)c4cc(Br)cnc24		2	3	3	0.45	0.567568	0.515152	4.54628	-4.54628						0.5	0.75	0.75	0.363158	0.459459	0.353535	0.78995		0.5	0.75	0.75	0.363158	0.459459	0.353535	0.78995
PathogenBox_PlateD	C08	MMV688467	KINETOPLASTIDS	CCCCN(CCCC)c1c(cc(cc1C#N)S(=O)(=O)Nc2ccccc2)C#N		0	0	0	0.15	0.135135	0.272727	40.5287	-40.5287						0	0	0	0.0157895	-0.0810811	0.030303	0.455653		0	0	0	0.0157895	0	0.030303	0.455653
PathogenBox_PlateD	C09	MMV675998	KINETOPLASTIDS	COc1ccc(cc1c2cn(nn2)c3ccc(cc3)C(=N)N)C(=N)N		0	0	0	0.05	0.0810811	0.0909091	69.2767	-69.2767						0	0	0	-0.1	-0.148649	-0.212121	0.188568		0	0	0	0	0	0	0.188568
PathogenBox_PlateD	C10	MMV659010	KINETOPLASTIDS	FC(F)(F)c1cc(NCCc2ccccc2)nc(n1)c3ccccn3		1	2	4	0.05	0.513514	0.393939	58.7115	-58.7115						0.25	0.5	1	-0.1	0.391892	0.191919	0.286724		0.25	0.5	1	0	0.391892	0.191919	0.286724
PathogenBox_PlateD	C11	MMV676008	KINETOPLASTIDS	OC(=O)c1cccc2oc(nc12)c3cccc(O)c3NC(=O)c4cc(on4)c5ccccc5		0	0	0	0.05	0.027027	0.030303	80.2468	-80.2468						0	0	0	-0.1	-0.216216	-0.292929	0.0866496		0	0	0	0	0	0	0.0866496
PathogenBox_PlateD	D02	MMV676269	MALARIA	C[C@@H](N1CCCC[C@H]1c2ccc(OCc3cccc(F)c3)cc2)C(=O)N		0	0	0	0.05	0.0810811	0.212121	117.653	-117.653						0	0	0	-0.1	-0.148649	-0.0505051	-0.260877		0	0	0	0	0	0	0
PathogenBox_PlateD	D03	MMV020081	MALARIA	COc1cccc(CC(=O)N2CCC(CC2)n3c(C)nc4ccc(F)cc34)c1		1	1	1	0.1	0.405405	0.393939	115.832	-115.832						0.25	0.25	0.25	-0.0421053	0.256757	0.191919	-0.243961		0.25	0.25	0.25	0	0.256757	0.191919	0
PathogenBox_PlateD	D04	MMV026550	MALARIA	CC(C)(C)CN1C(=NC(C1=O)(c2ccccc2)c3ccccc3)N		0	0	0	0.1	0.135135	0.272727	88.6378	-88.6378						0	0	0	-0.0421053	-0.0810811	0.030303	0.0086918		0	0	0	0	0	0.030303	0.0086918
PathogenBox_PlateD	D05	MMV675995	ONCHOCERCIASIS	COc1ccc(cc1)N(CCc2cccc(C)n2)C(=O)C		1	1	0	0.15	0.135135	0.0909091	114.274	-114.274						0.25	0.25	0	0.0157895	-0.0810811	-0.212121	-0.229482		0.25	0.25	0	0.0157895	0	0	0
PathogenBox_PlateD	D06	MMV688274	KINETOPLASTIDS	Fc1cccc(COc2ccc(Nc3ncnc4ccc(NC(=O)CN5CCOCC5)cc34)cc2Cl)c1		0	0	0	0.3	0.25	0.222222	124.787	-124.787						0	0	0	0.189474	0.0625	-0.037037	-0.327153		0	0	0	0.189474	0.0625	0	0
PathogenBox_PlateD	D07	MMV023860	MALARIA	NS(=O)(=O)c1cccc(c1)c2ccc3ncc(nc3c2)N4CCOCC4		0	0	0	0.15	0.189189	0.454545	116.496	-116.496						0	0	0	0.0157895	-0.0135135	0.272727	-0.250123		0	0	0	0.0157895	0	0.272727	0
PathogenBox_PlateD	D08	MMV688407	KINETOPLASTIDS	COc1cc(ccc1c2cn(nn2)c3cccc(c3)C4=NCCN4)C5=NCCN5		1	0	0	0.25	0.297297	0.393939	72.8203	-72.8203						0.25	0	0	0.131579	0.121622	0.191919	0.155645		0.25	0	0	0.131579	0.121622	0.191919	0.155645
PathogenBox_PlateD	D09	MMV023949	MALARIA	CC(C)(C)c1cc(C(=O)N2CCN(CC2)c3nccnc3C#N)n(Cc4ccccc4)n1		0	0	1	0	0.027027	0.030303	119.881	-119.881						0	0	0.25	-0.157895	-0.216216	-0.292929	-0.281576		0	0	0.25	0	0	0	0
PathogenBox_PlateD	D10	MMV676050	CRYPTOSPORIDIOSIS	CS(=O)(=O)N1CCC(Cn2nc(Cc3cccc4ccccc34)c5c(N)ncnc25)CC1		0	0	0	0.1	0.567568	0.636364	122.409	-122.409						0	0	0	-0.0421053	0.459459	0.515152	-0.305065		0	0	0	0	0.459459	0.515152	0
PathogenBox_PlateD	D11	MMV024406	MALARIA	Clc1cccc(NC(=O)c2cnc(N3CCN(CC3)c4ccncc4)c(Cl)c2)c1		2	4	4	0.8	0.945946	1	3.66635	-3.66635						0.5	1	1	0.768421	0.932432	1	0.798125		0.5	1	1	0.768421	0.932432	1	0.798125
PathogenBox_PlateD	E02	MMV023233	MALARIA	Nc1nccc2ccc(cc12)c3ccc4nccn4c3		4	4	4	0.567568	0.777778	0.75	41.053	-41.053						1	1	1	0.499289	0.722222	0.666667	0.450782		1	1	1	0.499289	0.722222	0.666667	0.450782
PathogenBox_PlateD	E03	MMV085230	MALARIA	CCCNC(=O)N1CCC2(CC1)CC(=O)c3cc(C)ccc3O2		0	0	0	0.1	0.15	0.111111	101.769	-101.769						0	0	0	-0.0421053	-0.0625	-0.185185	-0.113304		0	0	0	0	0	0	0
PathogenBox_PlateD	E04	MMV085071	MALARIA	COc1cncc(c1)c2cncc(n2)N3CCN(CC3)c4ccncc4		1	0	0	0.351351	0.388889	0.6875	103.016	-103.016						0.25	0	0	0.248933	0.236111	0.583333	-0.124894		0.25	0	0	0.248933	0.236111	0.583333	0
PathogenBox_PlateD	E05	MMV659004	KINETOPLASTIDS	Cc1nc(nc(N2CCC(Cc3ccccc3)C2)c1Cl)c4ccccn4		0	0	0	0.15	0.1	0.333333	-3.4583	3.4583						0	0	0	0.0157895	-0.125	0.111111	0.864317		0	0	0	0.0157895	0	0.111111	0.864317
PathogenBox_PlateD	E06	MMV676260	MALARIA	CN1CCN(CC1)c2nccc3nc([nH]c23)c4ccc(F)c(F)c4		0	0	0	0	0.1	0.166667	109.929	-109.929						0	0	0	-0.157895	-0.125	-0.111111	-0.189115		0	0	0	0	0	0	0
PathogenBox_PlateD	E07	MMV688364	TOXOPLASMOSIS	CC(C)(C)OC(=O)N1CCC(Cn2nc(-c3cnc4ccccc4c3)c3c(N)ncnc23)CC1		1	4	4	0.405405	0.444444	0.6875	125.299	-125.299						0.25	1	1	0.311522	0.305556	0.583333	-0.331909		0.25	1	1	0.311522	0.305556	0.583333	0
PathogenBox_PlateD	E08	MMV032995	MALARIA	FC(F)(F)c1ccc(CN2C(=O)COCc3ccc(Br)cc23)cc1		0	0	0	0.297297	0.388889	0.4375	99.5485	-99.5485						0	0	0	0.186344	0.236111	0.25	-0.0926739		0	0	0	0.186344	0.236111	0.25	0
PathogenBox_PlateD	E09	MMV688279	KINETOPLASTIDS	CC1=Nc2ccc(Cl)cc2C(O)(N1CCN3CCCCC3)c4ccc(C)cc4		0	0	0	0	0.1875	0.375	-4.23092	4.23092						0	0	0	-0.157895	-0.015625	0.166667	0.871495		0	0	0	0	0	0.166667	0.871495
PathogenBox_PlateD	E10	MMV688271	KINETOPLASTIDS	NC(=N)Nc1ccc(cc1Cl)c2oc(cc2)c3ccc(N=C(N)N)c(Cl)c3		0	0	0	0	0	0.0625	89.7247	-89.7247						0	0	0	-0.157895	-0.25	-0.25	-0.00140552		0	0	0	0	0	0	0
PathogenBox_PlateD	E11	MMV019790	MALARIA	CCOc1ccccc1C(=O)Nc2cccc(c2)c3nc4ncccn4c3C		0	0	0	0.0810811	0.388889	0.625	106.774	-106.774						0	0	0	-0.0640114	0.236111	0.5	-0.1598		0	0	0	0	0.236111	0.5	0
PathogenBox_PlateD	F02	MMV009135	MALARIA	O=C(C1CCN(CC1)c2nnnn2c3ccccc3)N4CCc5ccccc5C4		0	0	0	0.135135	0.111111	0.25	116.811	-116.811						0	0	0	-0.00142248	-0.111111	0	-0.253057		0	0	0	0	0	0	0
PathogenBox_PlateD	F03	MMV011765	MALARIA	FC(F)(F)c1cnc(Sc2oc(nn2)c3ccncc3)c(Cl)c1		0	1	2	0.459459	0.777778	0.9375	73.9805	-73.9805						0	0.25	0.5	0.374111	0.722222	0.916667	0.144866		0	0.25	0.5	0.374111	0.722222	0.916667	0.144866
PathogenBox_PlateD	F04	MMV024937	MALARIA	FC(F)(F)c1nc(oc1C(=O)Nc2ccc(nc2)N3CCNCC3)c4ccccc4		0	0	0	0.0810811	0.388889	0.625	69.6748	-69.6748						0	0	0	-0.0640114	0.236111	0.5	0.184869		0	0	0	0	0.236111	0.5	0.184869
PathogenBox_PlateD	F05	MMV085499	MALARIA	NC(=O)c1ccc(cc1)c2nc(cnc2N)c3ccc(cc3)C#N		2	2	4	0.027027	0.333333	0.5	113.238	-113.238						0.5	0.5	1	-0.1266	0.166667	0.333333	-0.219857		0.5	0.5	1	0	0.166667	0.333333	0
PathogenBox_PlateD	F06	MMV023985	MALARIA	COc1ccc(cc1OC)c2cnc3ccc(nn23)N4CCCC4		2	4	4	0.783784	0.944444	1	60.4687	-60.4687						0.5	1	1	0.749644	0.930556	1	0.270399		0.5	1	1	0.749644	0.930556	1	0.270399
PathogenBox_PlateD	F07	MMV024195	MALARIA	CN(C)CCNC(=O)N1CCCN(CC1)c2ncnc3cc(sc23)c4ccccc4		0	0	0	0	0.2	0.555556	105.867	-105.867						0	0	0	-0.157895	0	0.407407	-0.151379		0	0	0	0	0	0.407407	0
PathogenBox_PlateD	F08	MMV676063	ONCHOCERCIASIS	CCCCc1ccc(NC(=O)Nc2ccc(O[C@H]3CCCC[C@@H]3N(C)c4ccccc4)c(F)c2)cc1		0	0	0	0.111111	0.3125	0.875	33.6914	-33.6914						0	0	0	-0.0292398	0.140625	0.833333	0.519175		0	0	0	0	0.140625	0.833333	0.519175
PathogenBox_PlateD	F09	MMV676186	KINETOPLASTIDS	COC(=O)c1cccc2oc(nc12)c3cccc(OC)c3NC(=O)c4cc(on4)c5ccccc5		0	0	0	0.351351	0.333333	0.3125	88.0951	-88.0951						0	0	0	0.248933	0.166667	0.0833333	0.0137338		0	0	0	0.248933	0.166667	0.0833333	0.0137338
PathogenBox_PlateD	F10	MMV688474	KINETOPLASTIDS	COc1cc(ccc1n2cc(nn2)c3cccc(c3)C4=NCCN4)C5=NCCN5		1	0	0	0.243243	0.277778	0.5	77.1914	-77.1914						0.25	0	0	0.123755	0.0972222	0.333333	0.115036		0.25	0	0	0.123755	0.0972222	0.333333	0.115036
PathogenBox_PlateD	F11	MMV687812	TUBERCULOSIS	CN1CCN(CCCOc2ncc(Nc3ncc(nc3C(=O)N)c4ccc(c(F)c4)C(F)(F)F)cn2)CC1		3	3	3	1	1	1	5.19952	-5.19952						0.75	0.75	0.75	1	1	1	0.783881		0.75	0.75	0.75	1	1	1	0.783881
PathogenBox_PlateD	G02	MMV007803	MALARIA	Clc1ccccc1CSCc2oc(cc2)C(=O)NC3CC3		1	0	1	0.405405	0.444444	0.5625	113.885	-113.885						0.25	0	0.25	0.311522	0.305556	0.416667	-0.225867		0.25	0	0.25	0.311522	0.305556	0.416667	0
PathogenBox_PlateD	G03	MMV001059	MALARIA	CCCS(=O)(=O)N1CCC(CO)(Cc2ccccc2C(F)(F)F)CC1		2	4	4	0.243243	0.277778	0.75	95.7091	-95.7091						0.5	1	1	0.123755	0.0972222	0.666667	-0.0570039		0.5	1	1	0.123755	0.0972222	0.666667	0
PathogenBox_PlateD	G04	MMV011691	MALARIA	NCC(=O)N1CCn2c(C1)nc(c2Nc3ccc4OCOc4c3)c5ccccc5		0	0	2	0.297297	0.444444	0.6875	128.576	-128.576						0	0	0.5	0.186344	0.305556	0.583333	-0.362354		0	0	0.5	0.186344	0.305556	0.583333	0
PathogenBox_PlateD	G05	MMV676877	MALARIA	OCCNc1ccc(cc1)C(=O)C2C[C@H]2c3ccc(Cl)cc3		0	0	0	0.135135	0.277778	0.625	93.3079	-93.3079						0	0	0	-0.00142248	0.0972222	0.5	-0.0346959		0	0	0	0	0.0972222	0.5	0
PathogenBox_PlateD	G06	MMV663250	MALARIA	Clc1cccc(c1)C(c2ccc(CN3CCNCC3)cc2)n4ccnc4		1	1	4	0.405405	0.666667	0.875	76.1108	-76.1108						0.25	0.25	1	0.311522	0.583333	0.833333	0.125075		0.25	0.25	1	0.311522	0.583333	0.833333	0.125075
PathogenBox_PlateD	G07	MMV407539	WOLBACHIA LF	CCc1nc2ccc(cn2c1N(C)Cc3cccs3)C(=O)NCc4ccc5OCOc5c4		0	0	0	0	0.1	0.166667	139.866	-139.866						0	0	0	-0.157895	-0.125	-0.111111	-0.467247		0	0	0	0	0	0	0
PathogenBox_PlateD	G08	MMV688372	KINETOPLASTIDS	FC1=C(C=C(NC(=O)N2CCCC2)C=C1)C1=NC2=CC(=CN=C2N1)C1=CC=CC=C1		0	4	4	0.675676	0.666667	0.875	111.108	-111.108						0	1	1	0.624467	0.583333	0.833333	-0.200066		0	1	1	0.624467	0.583333	0.833333	0
PathogenBox_PlateD	G09	MMV658993	KINETOPLASTIDS	Cc1nc(nc(NCCc2ccc(cc2)S(=O)(=O)C)c1Cl)c3ccccn3		0	4	4	0.135135	0.166667	0.5	66.9203	-66.9203						0	1	1	-0.00142248	-0.0416667	0.333333	0.21046		0	1	1	0	0	0.333333	0.21046
PathogenBox_PlateD	G10	MMV676182	CRYPTOSPORIDIOSIS	Nc1ncnc2c1c(Cc3cccc4ccccc34)nn2CC5CCNCC5		0	0	0	0	0	0	96.1618	-96.1618						0	0	0	-0.157895	-0.25	-0.333333	-0.0612103		0	0	0	0	0	0	0
PathogenBox_PlateD	G11	MMV676411	TUBERCULOSIS	CC(Oc1ccccc1)C(=O)Nc2nc(cs2)c3ccccn3		2	0	4	0.297297	0.5	0.625	59.3731	-59.3731						0.5	0	1	0.186344	0.375	0.5	0.280578		0.5	0	1	0.186344	0.375	0.5	0.280578
PathogenBox_PlateD	H02	MMV007133	MALARIA	CC(C)N(Cc1ccccc1)S(=O)(=O)c2ccc(cc2)C(=O)Nc3cc(C)on3		1	0	0	0.135135	0.444444	0.25	106.371	-106.371						0.25	0	0	-0.00142248	0.305556	0	-0.15606		0.25	0	0	0	0.305556	0	0
PathogenBox_PlateD	H03	MMV022478	MALARIA	Clc1cccc(c1)c2cnn3ccc(nc23)C(=O)Nc4ccc(cc4)N5CCNCC5		2	4	4	0.72973	0.777778	0.9375	7.6983	-7.6983						0.5	1	1	0.687055	0.722222	0.916667	0.760666		0.5	1	1	0.687055	0.722222	0.916667	0.760666
PathogenBox_PlateD	H04	MMV024101	MALARIA	NS(=O)(=O)c1cncc(c1)c2ccc3nccc(c4cn[nH]c4)c3n2		0	0	0	0.135135	0.111111	0.3125	98.3842	-98.3842						0	0	0	-0.00142248	-0.111111	0.0833333	-0.081857		0	0	0	0	0	0.0833333	0
PathogenBox_PlateD	H05	MMV676881	MALARIA	CCn1cnc2c(Nc3cc(F)cc(F)c3)nc(nc12)C#N		4	4	4	0.351351	0.888889	0.75	97.6567	-97.6567						1	1	1	0.248933	0.861111	0.666667	-0.0750987		1	1	1	0.248933	0.861111	0.666667	0
PathogenBox_PlateD	H06	MMV024443	MALARIA	CN(C(=O)c1cc2c(cccc2[nH]1)c3cncnc3)c4ccccc4		0	0	0	0.189189	0.277778	0.375	101.937	-101.937						0	0	0	0.0611664	0.0972222	0.166667	-0.114863		0	0	0	0.0611664	0.0972222	0.166667	0
PathogenBox_PlateD	H07	MMV688469	TOXOPLASMOSIS	Nc1ncnc2[nH]nc(Cc3cccc4ccccc34)c12		1	2	3	0.243243	0.333333	0.5625	94.1266	-94.1266						0.25	0.5	0.75	0.123755	0.166667	0.416667	-0.0423019		0.25	0.5	0.75	0.123755	0.166667	0.416667	0
PathogenBox_PlateD	H08	MMV023388	MALARIA	FC(F)(F)c1cccc(c1)C(=O)NC2CCN(C2)c3ccnc4ccccc34		0	0	0	0.135135	0.555556	0.9375	103.301	-103.301						0	0	0	-0.00142248	0.444444	0.916667	-0.127541		0	0	0	0	0.444444	0.916667	0
PathogenBox_PlateD	H09	MMV675968	CRYPTOSPORIDIOSIS	COc1ccc(OC)c(NCc2ccc3nc(N)nc(N)c3c2Cl)c1		0	2	0	0	0.05	0.277778	108.879	-108.879						0	0.5	0	-0.157895	-0.1875	0.037037	-0.179361		0	0.5	0	0	0	0.037037	0
PathogenBox_PlateD	H10	MMV675996	ONCHOCERCIASIS	COc1ccc(cc1)N(CCc2cccc(C)n2)C(=O)C3CCCCC3		0	2	1	0.15	0.2	0.111111	88.6742	-88.6742						0	0.5	0.25	0.0157895	0	-0.185185	0.00835379		0	0.5	0.25	0.0157895	0	0	0.00835379
PathogenBox_PlateD	H11	MMV688980	MALARIA	CCC1=CC(=O)N(C)C(=N1)SC(C)C(=O)Nc2ccc(F)cc2		0	0	1	0.135135	0.111111	0	115.434	-115.434						0	0	0.25	-0.00142248	-0.111111	-0.333333	-0.240257		0	0	0.25	0	0	0	0
PathogenBox_PlateE	A02	MMV011229	MALARIA	CC1=NC2=NC=CN2C(NC3=CC=C(C(F)(F)F)C=C3)=C1		0	0	0	0.0909091	0.15	0.157895	71.7278	-71.7278						0	0	0	-0.0526316	-0.0625	-0.122807	0.165796		0	0	0	0	0	0	0.165796
PathogenBox_PlateE	A03	MMV676468	TUBERCULOSIS	NC(CC(=O)c1ccc(Cl)cc1Cl)C(Cl)(Cl)Cl		0	0	0	0.0454545	0.1	0.157895	69.239	-69.239						0	0	0	-0.105263	-0.125	-0.122807	0.188918		0	0	0	0	0	0	0.188918
PathogenBox_PlateE	A04	MMV688771	SCHISTOSOMIASIS	Cc1ccccc1C(=O)N2N=C(Nc3ccccc3)SC2(C)C		1	2	0	0.0454545	0.1	0.157895	88.7097	-88.7097						0.25	0.5	0	-0.105263	-0.125	-0.122807	0.00802436		0.25	0.5	0	0	0	0	0.00802436
PathogenBox_PlateE	A05	MMV687798	REFERENCE	C[C@H]1COc2c(N3CCN(C)CC3)c(F)cc4C(=O)C(=CN1c24)C(=O)O	Levofloxacin (-)-ofloxacin	0	0	0	0.0454545	0.05	0.0526316	67.9024	-67.9024						0	0	0	-0.105263	-0.1875	-0.263158	0.201335		0	0	0	0	0	0	0.201335
PathogenBox_PlateE	A06	MMV688775	REFERENCE	CO[C@H]1\C=C\O[C@@]2(C)OC3=C(C2=O)C4=C(O)\C(=C/NN5CCN(C)CC5)\C(=N\C(=O)\C(=C/C=C\[C@H](C)[C@H](O)[C@@H](C)[C@@H](O)[C@@H](C)[C@H](OC(=O)C)[C@@H]1C)\C)\C(=C4C(=C3C)O)O	Rifampicin	0	0	0	0.0454545	0.05	0.105263	116.032	-116.032						0	0	0	-0.105263	-0.1875	-0.192982	-0.245811		0	0	0	0	0	0	0
PathogenBox_PlateE	A07	MMV676159	KINETOPLASTIDS	Clc1cccc(CO[C@H]2CCc3ccccc3[C@@H]2n4ccnn4)c1		3	4	4	0	0.1	0.157895	80.7104	-80.7104						0.75	1	1	-0.157895	-0.125	-0.122807	0.0823424		0.75	1	1	0	0	0	0.0823424
PathogenBox_PlateE	A08	MMV393144	MALARIA	CN1CCN(CC1)c2nccc3[nH]c(cc23)c4cccc(F)c4		0	2	4	0.0909091	0.1	0.157895	66.3172	-66.3172						0	0.5	1	-0.0526316	-0.125	-0.122807	0.216063		0	0.5	1	0	0	0	0.216063
PathogenBox_PlateE	A09	MMV007920	MALARIA	Nc1ccc(cc1)C(=O)Nc2ccc(cc2)c3oc4ccccc4n3		0	0	0	0.0909091	0.05	0.210526	64.1582	-64.1582						0	0	0	-0.0526316	-0.1875	-0.0526316	0.236121		0	0	0	0	0	0	0.236121
PathogenBox_PlateE	A10	MMV688270	SCHISTOSOMIASIS	COc1ccc(cc1)-c1cnc2cnc(cn12)-c1cccc(OC(C)C)c1		2	4	4	0.0454545	0	0.105263	39.0486	-39.0486						0.5	1	1	-0.105263	-0.25	-0.192982	0.469404		0.5	1	1	0	0	0	0.469404
PathogenBox_PlateE	A11	MMV019993	MALARIA	CC(Nc1nncc(n1)c2ccc(cc2)C(F)(F)F)c3cn(C)nc3C		0	0	0	0.136364	0.1	0.105263	77.4889	-77.4889						0	0	0	-6.42761e-17	-0.125	-0.192982	0.112272		0	0	0	0	0	0	0.112272
PathogenBox_PlateE	B02	MMV687794	MALARIA	CC1(C)Cc2c(CO1)c(nc3snc(Br)c23)N4CCOCC4		0	0	0	0.0454545	0.1	0.105263	71.5118	-71.5118						0	0	0	-0.105263	-0.125	-0.192982	0.167802		0	0	0	0	0	0	0.167802
PathogenBox_PlateE	B03	MMV676470	TUBERCULOSIS	CCOc1ccc(OCC(=O)Nc2cc(C)cc(C)c2)cc1		0	0	0	0.0909091	0.05	0.157895	66.972	-66.972						0	0	0	-0.0526316	-0.1875	-0.122807	0.20998		0	0	0	0	0	0	0.20998
PathogenBox_PlateE	B04	MMV688938	TUBERCULOSIS	CCOc1ccc(cc1)c2nc(CNCCc3ccc(F)cc3)cs2		0	0	0	0.272727	0.4	0.631579	2.25739	-2.25739						0	0	0	0.157895	0.25	0.508772	0.811215		0	0	0	0.157895	0.25	0.508772	0.811215
PathogenBox_PlateE	B05	MMV689000	REFERENCE COMPOUNDS	C[C@@H]1OC(=O)C[C@H](O)C[C@H](O)CC[C@@H](O)[C@H](O)C[C@H](O)C[C@]2(O)C[C@H](O)[C@H]([C@H](C[C@@H](O[C@@H]3O[C@H](C)[C@@H](O)[C@H](N)[C@@H]3O)\C=C\C=C\C=C\C=C\C=C\C=C\C=C\[C@H](C)[C@@H](O)[C@H]1C)O2)C(=O)O	Amphotericin B	0	0	0	0.136364	0.15	0.105263	94.9504	-94.9504						0	0	0	-6.42761e-17	-0.0625	-0.192982	-0.0499555		0	0	0	0	0	0	0
PathogenBox_PlateE	B06	MMV004168	KINETOPLASTIDS	CN1CCCN(CC1)C(c2ccccc2)c3ccc(Cl)cc3		0	0	0	0.454545	0.05	0.263158	67.8552	-67.8552						0	0	0	0.368421	-0.1875	0.0175439	0.201775		0	0	0	0.368421	0	0.0175439	0.201775
PathogenBox_PlateE	B07	MMV676161	KINETOPLASTIDS	C(N1CCOCC1)c2cc(n[nH]2)c3ccc(Oc4ccccc4)cc3		0	0	0	0.0454545	0.05	0.157895	85.9048	-85.9048						0	0	0	-0.105263	-0.1875	-0.122807	0.0340829		0	0	0	0	0	0	0.0340829
PathogenBox_PlateE	B08	MMV023183	MALARIA	C(C1CC1)N2Cc3ccccc3OC4(CCN(Cc5c[nH]c6cnccc56)CC4)C2		0	0	0	0	0.1	0.210526	57.974	-57.974						0	0	0	-0.157895	-0.125	-0.0526316	0.293576		0	0	0	0	0	0	0.293576
PathogenBox_PlateE	B09	MMV047015	TUBERCULOSIS	COc1cc(nc2ccc(C)c(N)c12)C(F)(F)F		0	0	0	0.136364	0.05	0.0526316	79.3044	-79.3044						0	0	0	-6.42761e-17	-0.1875	-0.263158	0.0954047		0	0	0	0	0	0	0.0954047
PathogenBox_PlateE	B10	MMV688795	KINETOPLASTIDS	O=C(NCCc1ccn(n1)c2ccccc2)C3CCCCC3		0	0	0	0.136364	0	0.0526316	74.0547	-74.0547						0	0	0	-6.42761e-17	-0.25	-0.263158	0.144178		0	0	0	0	0	0	0.144178
PathogenBox_PlateE	B11	MMV688352	DENGUE	Clc1ccc(cc1)[C@@H]2[C@H](Oc3ccccc3)C(=O)N2CCn4cnc5c(NCc6ccccc6)ncnc45		3	4	4	0.136364	0.1	0.157895	68.0969	-68.0969						0.75	1	1	-6.42761e-17	-0.125	-0.122807	0.199529		0.75	1	1	0	0	0	0.199529
PathogenBox_PlateE	C02	MMV676398	WOLBACHIA LF	CCS(=O)(=O)N(Cc1occc1)Cc2cc3ccc(C)cc3nc2O		0	1	0	0.2	0.333333	0.5	55.5496	-55.5496						0	0.25	0	0.0736842	0.166667	0.333333	0.3161		0	0.25	0	0.0736842	0.166667	0.333333	0.3161
PathogenBox_PlateE	C03	MMV676472	TUBERCULOSIS	COc1cccc(OC)c1C(=O)Nc2ccc(Cl)c(c2)c3nc4ccccc4s3		2	2	2	0.4	0.5	0.625	107.517	-107.517						0.5	0.5	0.5	0.305263	0.375	0.5	-0.166704		0.5	0.5	0.5	0.305263	0.375	0.5	0
PathogenBox_PlateE	C04	MMV671636	ONCHOCERCIASIS	CC1=C(C(=O)c2c(F)cc(F)cc2N1)c3ccc(Oc4ccc(OC(F)(F)F)cc4)cc3		2	4	4	0.45	0.777778	0.75	74.5892	-74.5892						0.5	1	1	0.363158	0.722222	0.666667	0.139212		0.5	1	1	0.363158	0.722222	0.666667	0.139212
PathogenBox_PlateE	C05	MMV676599	CRYPTOSPORIDIOSIS	CC(C)(C)n1nc(Cc2cccc3ccccc23)c4c(N)ncnc14		0	0	0	0.15	0.222222	0.625	85.4596	-85.4596						0	0	0	0.0157895	0.0277778	0.5	0.0382193		0	0	0	0.0157895	0.0277778	0.5	0.0382193
PathogenBox_PlateE	C06	MMV689244	KINETOPLASTIDS	FC(F)(F)c1ccc(cc1)N2CCN(CC2)C(=O)[C@@H](c3ccc(Cl)cc3)c4cccnc4		0	2	4	0.75	0.722222	0.75	46.7742	-46.7742						0	0.5	1	0.710526	0.652778	0.666667	0.397629		0	0.5	1	0.710526	0.652778	0.666667	0.397629
PathogenBox_PlateE	C07	MMV688411	TOXOPLASMOSIS	Nc1ncnc2n(CC3CCNCC3)nc(-c3cnc4ccccc4c3)c12		0	0	0	0.2	0.277778	0.5	168.694	-168.694						0	0	0	0.0736842	0.0972222	0.333333	-0.735078		0	0	0	0.0736842	0.0972222	0.333333	0
PathogenBox_PlateE	C08	MMV687765	TUBERCULOSIS	Cc1cnc(nc1Oc2ccc(cc2)n3ccnc3)N4CCN[C@@H](Cc5ccccc5)C4		4	4	4	0.3	0.555556	1	17.7949	-17.7949						1	1	1	0.189474	0.444444	1	0.666862		1	1	1	0.189474	0.444444	1	0.666862
PathogenBox_PlateE	C09	MMV020165	MALARIA	CC(C)NCC(=O)Nc1cccc(c1)C(=O)Nc2cccc(c2)C(F)(F)F		0	0	0	0.2	0.166667	0.375	86.679	-86.679						0	0	0	0.0736842	-0.0416667	0.166667	0.0268901		0	0	0	0.0736842	0	0.166667	0.0268901
PathogenBox_PlateE	C10	MMV676524	TUBERCULOSIS	Nc1cccnc1Nc2ccc(Cl)cc2		0	0	0	0.15	0.277778	0.375	157.272	-157.272						0	0	0	0.0157895	0.0972222	0.166667	-0.628961		0	0	0	0.0157895	0.0972222	0.166667	0
PathogenBox_PlateE	C11	MMV611037	TUBERCULOSIS	CCC(Sc1oc2ccccc2n1)C(=O)Nc3nnc(C)s3		0	0	0	0.1	0.111111	0.3125	82.8246	-82.8246						0	0	0	-0.0421053	-0.111111	0.0833333	0.0627		0	0	0	0	0	0.0833333	0.0627
PathogenBox_PlateE	D02	MMV688766	SCHISTOSOMIASIS	COc1ccc(c(O)c1)c2onc(c2c3ccc(Cl)cc3)C(F)(F)F		0	0	0	0.15	0.166667	0.1875	0.0885312	-0.0885312						0	0	0	0.0157895	-0.0416667	-0.0833333	0.831364		0	0	0	0.0157895	0	0	0.831364
PathogenBox_PlateE	D03	MMV200748	TUBERCULOSIS	COc1ccc(cc1)C2(CCCC2)C(=O)Nc3ccc(Br)cc3		0	0	1	0.25	0.388889	0.5	91.05	-91.05						0	0	0.25	0.131579	0.236111	0.333333	-0.0137182		0	0	0.25	0.131579	0.236111	0.333333	0
PathogenBox_PlateE	D04	MMV667494	MALARIA	FC1(F)CCN(CCCCNc2cc(c3cc(ccc3n2)Cl)C(=O)NCCN2CCCC2)CC1		2	4	4	0.3	0.388889	0.5625	86.9446	-86.9446						0.5	1	1	0.189474	0.236111	0.416667	0.0244228		0.5	1	1	0.189474	0.236111	0.416667	0.0244228
PathogenBox_PlateE	D05	MMV028694	MALARIA	OCCc1ccc(Nc2nccc(n2)c3nnc4ccccn34)cc1		0	1	4	0.2	0.555556	0.5625	109.221	-109.221						0	0.25	1	0.0736842	0.444444	0.416667	-0.182537		0	0.25	1	0.0736842	0.444444	0.416667	0
PathogenBox_PlateE	D06	MMV001499	REFERENCE	CC1CS(=O)(=O)CCN1\N=C\c2oc(cc2)[N+](=O)[O-]	Nifurtimox	0	0	0	0.3	0.277778	0.625	223.9	-223.9						0	0	0	0.189474	0.0972222	0.5	-1.24797		0	0	0	0.189474	0.0972222	0.5	0
PathogenBox_PlateE	D07	MMV688345	TOXOPLASMOSIS	Nc1nc(N)c2c3CCN(Cc4ccccc4)Cc3sc2n1		0	0	0	0.15	0.277778	0.4375	130.954	-130.954						0	0	0	0.0157895	0.0972222	0.25	-0.384447		0	0	0	0.0157895	0.0972222	0.25	0
PathogenBox_PlateE	D08	MMV010545	MALARIA	COc1ccc(cn1)c2cnc3ccc(NCc4ccc(cc4)S(=O)(=O)N)nn23		0	0	0	0.15	0.222222	0.3125	125.367	-125.367						0	0	0	0.0157895	0.0277778	0.0833333	-0.332546		0	0	0	0.0157895	0.0277778	0.0833333	0
PathogenBox_PlateE	D09	MMV023227	MALARIA	Cc1nc([nH]c1C)c2cccc(NCc3ccccc3)c2		0	0	0	0.1	0.111111	0.25	103.599	-103.599						0	0	0	-0.0421053	-0.111111	0	-0.130307		0	0	0	0	0	0	0
PathogenBox_PlateE	D10	MMV687700	TUBERCULOSIS	Nc1ncnc2c1ncn2[C@@H]3O[C@H](COS(=O)(=O)NC(=O)c4ccccc4O)[C@@H](O)[C@H]3O		0	0	0	0.1	0.111111	0.125	113.386	-113.386						0	0	0	-0.0421053	-0.111111	-0.166667	-0.221231		0	0	0	0	0	0	0
PathogenBox_PlateE	D11	MMV676384	TUBERCULOSIS	Fc1ccccc1c2oc(NCCc3ccccc3)c(n2)C#N		0	0	0	0.2	0.111111	0.125	93.968	-93.968						0	0	0	0.0736842	-0.111111	-0.166667	-0.0408281		0	0	0	0.0736842	0	0	0
PathogenBox_PlateE	E02	MMV020289	MALARIA	Cc1ccc(NC(=O)c2cc(ccc2C)S(=O)(=O)NC(C)(C)C)nc1		0	0	0	0.2	0.222222	0.375	90.2284	-90.2284						0	0	0	0.0736842	0.0277778	0.166667	-0.0060855		0	0	0	0.0736842	0.0277778	0.166667	0
PathogenBox_PlateE	E03	MMV002816	REFERENCE	CCN(CC)C(=O)N1CCN(C)CC1	Diethylcarbamazine	0	0	0	0.15	0.222222	0.375	95.5228	-95.5228						0	0	0	0.0157895	0.0277778	0.166667	-0.0552737		0	0	0	0.0157895	0.0277778	0.166667	0
PathogenBox_PlateE	E04	MMV634140	MALARIA	Clc1ccc2nc(cc(c2c1)C(=O)NCCN1CCCC1)NCCN1CCOCC1		0	0	0	0.15	0.222222	0.4375	146.487	-146.487						0	0	0	0.0157895	0.0277778	0.25	-0.528758		0	0	0	0.0157895	0.0277778	0.25	0
PathogenBox_PlateE	E05	MMV030734	MALARIA	CC(C)(CN)c1nc(c2ccc(Cl)c(O)c2)c([nH]1)c3ccnc(N)n3		0	0	0	0.15	0.166667	0.3125	155.966	-155.966						0	0	0	0.0157895	-0.0416667	0.0833333	-0.616822		0	0	0	0.0157895	0	0.0833333	0
PathogenBox_PlateE	E06	MMV689243	KINETOPLASTIDS	FC(F)(F)c1ccc(cc1)N(C2CCN(CC2)c3ccc(cn3)C(F)(F)F)c4cccnc4		0	0	1	0.2	0.222222	0.3125	77.466	-77.466						0	0	0.25	0.0736842	0.0277778	0.0833333	0.112485		0	0	0.25	0.0736842	0.0277778	0.0833333	0.112485
PathogenBox_PlateE	E07	MMV676358	MALARIA	Nc1ncc(Br)cc1c2nc3cc(Cl)cnc3[nH]2		0	0	0	0.1	0.111111	0.1875	130.909	-130.909						0	0	0	-0.0421053	-0.111111	-0.0833333	-0.384028		0	0	0	0	0	0	0
PathogenBox_PlateE	E08	MMV687729	TUBERCULOSIS	OC[C@H]1CN(C(=O)O1)c2cc(F)c(C3=CCN(Cc4ccccc4)CC3)c(F)c2		0	0	2	0.05	0.111111	0.1875	126.632	-126.632						0	0	0.5	-0.1	-0.111111	-0.0833333	-0.344298		0	0	0.5	0	0	0	0
PathogenBox_PlateE	E09	MMV407834	MALARIA	CCOc1ccccc1NC(C)C(=O)Nc2cc(ccc2N3CCOCC3)C(F)(F)F		0	0	0	0.15	0.166667	0.3125	96.0204	-96.0204						0	0	0	0.0157895	-0.0416667	0.0833333	-0.0598968		0	0	0	0.0157895	0	0.0833333	0
PathogenBox_PlateE	E10	MMV687813	TUBERCULOSIS	Fc1cc(cc(F)c1C2=CCN(Cc3ccccc3)CC2)N4C[C@H](COc5ccon5)OC4=O		0	0	0	0.1	0.166667	0.25	72.864	-72.864						0	0	0	-0.0421053	-0.0416667	0	0.15524		0	0	0	0	0	0	0.15524
PathogenBox_PlateE	E11	MMV153413	TUBERCULOSIS	CCOC(=O)c1c(C)c(sc1NC(=O)c2c(F)c(F)c(F)c(F)c2F)C(=O)N		4	4	4	1	1	1	-3.41811	3.41811						1	1	1	1	1	1	0.863943		1	1	1	1	1	1	0.863943
PathogenBox_PlateE	F02	MMV019551	MALARIA	CCC(NC(=O)c1ccccc1NC(=O)c2ccc(C)cc2)C(=O)OC		0	1	1	0.2	0.166667	0.25	82.8553	-82.8553						0	0.25	0.25	0.0736842	-0.0416667	0	0.0624145		0	0.25	0.25	0.0736842	0	0	0.0624145
PathogenBox_PlateE	F03	MMV688552	SCHISTOSOMIASIS	CC(C(SC1=NC=CC=N1)=C2C)=NN2C(NC3=CC=CC(C(F)(F)F)=C3)=O		0	0	0	0.15	0.166667	0.3125	137.036	-137.036						0	0	0	0.0157895	-0.0416667	0.0833333	-0.440953		0	0	0	0.0157895	0	0.0833333	0
PathogenBox_PlateE	F04	MMV016838	MALARIA	Cc1ccc(cc1)-c1cc(c2cc(ccc2n1)Br)C(=O)Nc1cccnc1		2	1	0	0.5	0.666667	1	145.701	-145.701						0.5	0.25	0	0.421053	0.583333	1	-0.521458		0.5	0.25	0	0.421053	0.583333	1	0
PathogenBox_PlateE	F05	MMV676270	MALARIA	C[C@@H](N1CCCC[C@@H]1c2ccc(OCc3cccc(F)c3)cc2)C(=O)N		0	0	0	0.2	0.444444	0.5	88.0975	-88.0975						0	0	0	0.0736842	0.305556	0.333333	0.0137115		0	0	0	0.0736842	0.305556	0.333333	0.0137115
PathogenBox_PlateE	F06	MMV688755	TUBERCULOSIS	[O-][N+](=O)c1cn2C[C@@H](COc2n1)OCc3ccc(OC(F)(F)F)cc3		0	0	0	0.2	0.166667	0.3125	158.335	-158.335						0	0	0	0.0736842	-0.0416667	0.0833333	-0.638835		0	0	0	0.0736842	0	0.0833333	0
PathogenBox_PlateE	F07	MMV228911	TUBERCULOSIS	COc1cccc(NC(=O)c2c3CCCc3sc2NC(=O)c4cccnc4)c1		0	0	0	0.25	0.222222	0.4375	94.438	-94.438						0	0	0	0.131579	0.0277778	0.25	-0.0451953		0	0	0	0.131579	0.0277778	0.25	0
PathogenBox_PlateE	F08	MMV272144	TUBERCULOSIS	COc1cccc(c1)n2nnnc2S(=O)(=O)C		4	4	4	1	1	1	-0.214395	0.214395						1	1	1	1	1	1	0.834179		1	1	1	1	1	1	0.834179
PathogenBox_PlateE	F09	MMV026313	MALARIA	Nc1nccc2ccc(Oc3ccncc3)cc12		0	0	0	0.1	0.222222	0.375	152.132	-152.132						0	0	0	-0.0421053	0.0277778	0.166667	-0.581207		0	0	0	0	0.0277778	0.166667	0
PathogenBox_PlateE	F10	MMV161996	TUBERCULOSIS	CC(C)CNS(=O)(=O)c1ccc(CCC(=O)Nc2ccc(Cl)cc2C)cc1		0	0	0	0.2	0.277778	0.375	107.117	-107.117						0	0	0	0.0736842	0.0972222	0.166667	-0.162994		0	0	0	0.0736842	0.0972222	0.166667	0
PathogenBox_PlateE	F11	MMV688543	DENGUE	CC(C)(C)C(=O)N(CCCCCCN1C[C@H](O)[C@@H](O)[C@H](O)[C@H]1CO)C2CCCCCC2		0	2	4	0.25	0.555556	1	121.637	-121.637						0	0.5	1	0.131579	0.444444	1	-0.297891		0	0.5	1	0.131579	0.444444	1	0
PathogenBox_PlateE	G02	MMV146306	TUBERCULOSIS	CCC(C)NC(=O)c1ccc(NC(=O)C2(CCCC2)c3ccccc3)cc1		0	0	0	0.05	0.027027	0.030303	90.6175	-90.6175						0	0	0	-0.1	-0.216216	-0.292929	-0.00970068		0	0	0	0	0	0	0
PathogenBox_PlateE	G03	MMV688557	TUBERCULOSIS	NCC(c1cccs1)S(=O)(=O)c2ccccc2		1	1	2	0.15	0.05	0.0555556	45.1527	-45.1527						0.25	0.25	0.5	0.0157895	-0.1875	-0.259259	0.412693		0.25	0.25	0.5	0.0157895	0	0	0.412693
PathogenBox_PlateE	G04	MMV021013	TUBERCULOSIS	C1CCC(CC1)Nc2cc(nc(n2)c3ccccn3)C4CC4		0	0	0	0	0.0810811	0.151515	16.4359	-16.4359						0	0	0	-0.157895	-0.148649	-0.131313	0.679488		0	0	0	0	0	0	0.679488
PathogenBox_PlateE	G05	MMV392832	MALARIA	COc1cccc(c1)c2cc3c(Nc4cccnc4)nccc3[nH]2		0	0	0	0.1	0.135135	0.151515	104.341	-104.341						0	0	0	-0.0421053	-0.0810811	-0.131313	-0.137201		0	0	0	0	0	0	0
PathogenBox_PlateE	G06	MMV688754	KINETOPLASTIDS	CO\N=C(/C(=O)OC)\c1ccccc1CO\N=C(/C)\c2cccc(c2)C(F)(F)F	Trifloxystrobin	1	0	0	0.05	0.027027	0.151515	108.923	-108.923						0.25	0	0	-0.1	-0.216216	-0.131313	-0.179768		0.25	0	0	0	0	0	0
PathogenBox_PlateE	G07	MMV001561	KINETOPLASTIDS	CNCCC(Oc1ccc(cc1)C(F)(F)F)c2ccccc2	Fluoxetine	0	0	0	0.05	0.0810811	0.333333	20.39	-20.39						0	0	0	-0.1	-0.148649	0.111111	0.642753		0	0	0	0	0	0.111111	0.642753
PathogenBox_PlateE	G08	MMV658988	KINETOPLASTIDS	CN(CCc1ccccc1)c2nc(nc(C)c2Cl)c3ccccn3		1	4	4	0	0.189189	0.69697	20.6685	-20.6685						0.25	1	1	-0.157895	-0.0135135	0.59596	0.640165		0.25	1	1	0	0	0.59596	0.640165
PathogenBox_PlateE	G09	MMV084864	MALARIA	O=C(Nc1cnc2ccccc2c1)c3cccc(c3)n4cnnn4		0	0	0	0	0	0.030303	85.6754	-85.6754						0	0	0	-0.157895	-0.25	-0.292929	0.0362147		0	0	0	0	0	0	0.0362147
PathogenBox_PlateE	G10	MMV676492	LYMPHATIC FILARIASIS	Sc1nnc(NC(=O)c2cc(Br)ccc2Cl)s1		0	0	0	0.05	0.027027	0.0909091	91.6957	-91.6957						0	0	0	-0.1	-0.216216	-0.212121	-0.0197174		0	0	0	0	0	0	0
PathogenBox_PlateE	G11	MMV688415	KINETOPLASTIDS	CO[C@@H]1CN(C[C@H]1O)c2ccc(C#CC3(O)CN4CCC3CC4)c(Cc5ccccc5)n2		0	0	0	0	0	0.111111	90.7422	-90.7422						0	0	0	-0.157895	-0.25	-0.185185	-0.0108588		0	0	0	0	0	0	0
PathogenBox_PlateE	H02	MMV688330	TOXOPLASMOSIS	CC(=O)N1CCN(CC1)c1ccc(Oc2ccc(Cl)cc2O)cc1		0	0	0	0.1	0.027027	0.030303	89.6897	-89.6897						0	0	0	-0.0421053	-0.216216	-0.292929	-0.00108088		0	0	0	0	0	0	0
PathogenBox_PlateE	H03	MMV687796	REFERENCE	NCCC(O)C(=O)N[C@@H]1C[C@H](N)[C@@H](OC2O[C@H](CN)[C@@H](O)[C@H](O)[C@H]2O)[C@H](O)C1OC3O[C@H](CO)[C@@H](O)[C@H](N)[C@H]3O	Amikacin	0	0	0	0	0.0625	0	93.8008	-93.8008						0	0	0	-0.157895	-0.171875	-0.333333	-0.0392751		0	0	0	0	0	0	0
PathogenBox_PlateE	H04	MMV688939	TUBERCULOSIS	Cc1ccc2nc(C)c(c3ccn(Cc4ccccc4)n3)n2c1		3	4	4	0	0	0.111111	95.7234	-95.7234						0.75	1	1	-0.157895	-0.25	-0.185185	-0.057137		0.75	1	1	0	0	0	0
PathogenBox_PlateE	H05	MMV688978	REFERENCE	CCP(=[Au]S[C@H]1O[C@@H](COC(=O)C)[C@H](OC(=O)C)[C@@H](OC(=O)C)[C@@H]1OC(=O)C)(CC)CC	Auranofin	4	4	4	1	1	1	203.013	-203.013						1	1	1	1	1	1	-1.05392		1	1	1	1	1	1	0
PathogenBox_PlateE	H06	MMV688990	REFERENCE	CCCCCCCCCCCCCCCCOP(=O)([O-])OCC[N+](C)(C)C	Miltefosine	0	0	0	0.05	0.243243	0.272727	126.647	-126.647						0	0	0	-0.1	0.0540541	0.030303	-0.344432		0	0	0	0	0.0540541	0.030303	0
PathogenBox_PlateE	H07	MMV688273	KINETOPLASTIDS	Nc1ccc2ncnc(Nc3ccc(OCc4cccc(F)c4)c(Cl)c3)c2c1		4	4	4	0.3	0.621622	0.878788	55.9038	-55.9038						1	1	1	0.189474	0.527027	0.838384	0.312809		1	1	1	0.189474	0.527027	0.838384	0.312809
PathogenBox_PlateE	H08	MMV393995	TUBERCULOSIS	Cc1cc(O)nc(n1)n2nc(C)cc2C		0	0	0	0.15	0.243243	0.575758	93.1411	-93.1411						0	0	0	0.0157895	0.0540541	0.434343	-0.0331463		0	0	0	0.0157895	0.0540541	0.434343	0
PathogenBox_PlateE	H09	MMV1236379	KINETOPLASTIDS	CCOC(=O)c1noc(N)c1c2ccccc2		0	0	0	0.05	0.0810811	0.0909091	94.1485	-94.1485						0	0	0	-0.1	-0.148649	-0.212121	-0.0425049		0	0	0	0	0	0	0
PathogenBox_PlateE	H10	MMV688550	KINETOPLASTIDS	CCc1ccccc1n2c(C)cn3c4C(=O)N(C(C(C)C)C(=O)OC)C(=O)N(C)c4nc23		1	0	0	0.15	0.405405	0.636364	107.795	-107.795						0.25	0	0	0.0157895	0.256757	0.515152	-0.169292		0.25	0	0	0.0157895	0.256757	0.515152	0
PathogenBox_PlateE	H11	MMV495543	TUBERCULOSIS	CC(C)(C)c1cnc(NC(=O)c2ccccc2O)s1		0	1	1	1	1	1	79.8629	-79.8629						0	0.25	0.25	1	1	1	0.0902159		0	0.25	0.25	1	1	1	0.0902159
								min	0	0	0	max

## Sheet: Table S4 
UCSD only hits at 24 h							UCSD only hits at 48 h							UCSD only hits at 72 h								Swiss TPH only hits at 24 h							Swiss TPH only hits at 48 h							Swiss TPH only hits at 72 h								FIOCRUZ only hits at 72 h
COMPOUND ID	Disease set	SMILES	Trivial name	UCSD score 24 h	Swiss TPH score 24 h		COMPOUND ID	Disease set	SMILES	Trivial name	UCSD score 48 h	Swiss TPH score 48 h		COMPOUND ID	Disease set	SMILES	Trivial name	UCSD score 72 h	Swiss TPH score 72 h	FIOCRUZ score 72 h		COMPOUND ID	Disease set	SMILES	Trivial name	UCSD score 24 h	Swiss TPH score 24 h		COMPOUND ID	Disease set	SMILES	Trivial name	UCSD score48 h	Swiss TPH score 48 h		COMPOUND ID	Disease set	SMILES	Trivial name	UCSD score 72 h	Swiss TPH score 72 h	FIOCRUZ 72 h		COMPOUND ID	Disease set	SMILES	Trivial name	UCSD score 72 h	Swiss TPH score 72 h
MMV001059	KINETOPLASTIDS	CCCS(=O)(=O)N1CCC(CO)(Cc2ccccc2C(F)(F)F)CC1		2	0.243243		MMV001059	KINETOPLASTIDS	CCCS(=O)(=O)N1CCC(CO)(Cc2ccccc2C(F)(F)F)CC1		4	0.277778										MMV003270	KINETOPLASTIDS	ClC1=CC(N=C(N)O2)=C2C=C1		0	1		MMV003270	KINETOPLASTIDS	ClC1=CC(N=C(N)O2)=C2C=C1		0	1		MMV003270	KINETOPLASTIDS	ClC1=CC(N=C(N)O2)=C2C=C1		0	1	76.515		MMV690028	KINETOPLASTIDS	COC1=C(OCCCCOC2=CC=C(C3=NNN=N3)C=C2)C=C(C4=NN(C5CCCCCC5)C(C4(C)C)=O)C=C1		0	0.127273
MMV002529	KINETOPLASTIDS	O=C(C1CCCCC1)N2CC3N(CCc4ccccc34)C(=O)C2		4	0.3		MMV002529	KINETOPLASTIDS	O=C(C1CCCCC1)N2CC3N(CCc4ccccc34)C(=O)C2		4	0.351351										MMV495543	KINETOPLASTIDS	CC(C)(C)c1cnc(NC(=O)c2ccccc2O)s1		0	1		MMV495543	KINETOPLASTIDS	CC(C)(C)c1cnc(NC(=O)c2ccccc2O)s1		1	1		MMV495543	KINETOPLASTIDS	CC(C)(C)c1cnc(NC(=O)c2ccccc2O)s1		1	1	79.8629		MMV688936	TUBERCULOSIS	Clc1cccc2sc(nc12)N(CCCn3ccnc3)C(=O)c4occc4		0	0.4
MMV011903	KINETOPLASTIDS	Cc1ccc(NC(=O)c2nc[nH]c2C(=O)Nc3nc4ccccc4[nH]3)c(C)c1		3	0.272727		MMV011903	KINETOPLASTIDS	Cc1ccc(NC(=O)c2nc[nH]c2C(=O)Nc3nc4ccccc4[nH]3)c(C)c1		4	0.4		MMV011903	KINETOPLASTIDS	Cc1ccc(NC(=O)c2nc[nH]c2C(=O)Nc3nc4ccccc4[nH]3)c(C)c1		4	0.277778	50.7945		MMV676412	KINETOPLASTIDS	Clc1ccc(cc1)S(=O)(=O)c2oc(nc2C#N)c3ccccc3		0	1		MMV676412	KINETOPLASTIDS	Clc1ccc(cc1)S(=O)(=O)c2oc(nc2C#N)c3ccccc3		0	1										MMV688854	CRYPTOSPORIDIOSIS	CCOc1ccc2cc(ccc2c1)c3nn(CC4CCN(C)CC4)c5ncnc(N)c35		0	0.388889
MMV020512	MALARIA	Cc1ccc(Oc2ccc(NC(=O)CNc3ccccc3N4CCCC4=O)cc2)cc1		2	0.2		MMV020512	MALARIA	Cc1ccc(Oc2ccc(NC(=O)CNc3ccccc3N4CCCC4=O)cc2)cc1		2	0.333333										MMV688178	KINETOPLASTIDS	O(c1ccccc1)c1ccc(cc1)-c1cncc(n1)-c1ccc2[nH]ccc2c1		0	0.6		MMV688178	KINETOPLASTIDS	O(c1ccccc1)c1ccc(cc1)-c1cncc(n1)-c1ccc2[nH]ccc2c1		0	1										MMV687776	LYMPHATIC FILARIASIS	Cc1cc(ccc1C(=O)NCc2ccc3B(O)OC(C)(C)c3c2)C4=NOC(C4)(c5cc(Cl)c(F)c(Cl)c5)C(F)(F)F		0	0.166667
MMV023969	KINETOPLASTIDS	C(Nc1cccnc1)c2ccc(s2)c3cc4ccncc4cc3OC5CCNCC5		3	0.136364		MMV023969	KINETOPLASTIDS	C(Nc1cccnc1)c2ccc(s2)c3cc4ccncc4cc3OC5CCNCC5		3	0.45										MMV688372	TUBERCULOSIS	FC1=C(C=C(NC(=O)N2CCCC2)C=C1)C1=NC2=CC(=CN=C2N1)C1=CC=CC=C1		0	0.675676		MMV023388	LYMPHATIC FILARIASIS	FC(F)(F)c1cccc(c1)C(=O)NC2CCN(C2)c3ccnc4ccccc34		0	0.555556		MMV023388	LYMPHATIC FILARIASIS	FC(F)(F)c1cccc(c1)C(=O)NC2CCN(C2)c3ccnc4ccccc34		0	0.9375	103.301		MMV006901	MALARIA	CN(C)c1cc(NC(=O)Nc2ccccc2)c3ccccc3n1		0	0.454545
MMV062221	KINETOPLASTIDS	Cc1cc(C)nc(n1)n2nc(C)cc2Nc3ccccc3		2	0.0526316									MMV062221	KINETOPLASTIDS	Cc1cc(C)nc(n1)n2nc(C)cc2Nc3ccccc3		4	0.25	55.5551		MMV689244	KINETOPLASTIDS	FC(F)(F)c1ccc(cc1)N2CCN(CC2)C(=O)[C@@H](c3ccc(Cl)cc3)c4cccnc4		0	0.75		MMV676050	MALARIA	CS(=O)(=O)N1CCC(Cn2nc(Cc3cccc4ccccc34)c5c(N)ncnc25)CC1		0	0.567568		MMV676050	MALARIA	CS(=O)(=O)N1CCC(Cn2nc(Cc3cccc4ccccc34)c5c(N)ncnc25)CC1		0	0.636364	122.409		MMV688371	KINETOPLASTIDS	NCCN(C(=O)c1ccc(Cl)cc1Cl)c2ccc(OCc3ccc(Cl)cc3)cc2		0	0.3125
MMV085499	KINETOPLASTIDS	NC(=O)c1ccc(cc1)c2nc(cnc2N)c3ccc(cc3)C#N		2	0.027027		MMV085499	KINETOPLASTIDS	NC(=O)c1ccc(cc1)c2nc(cnc2N)c3ccc(cc3)C#N		2	0.333333										MMV022029	KINETOPLASTIDS	CN1CCC(CC1)NCc2cccc(c2)c3ccc(cc3)S(=O)(=O)NCc4ccccc4		0	0.6		MMV687248	MALARIA	Nc1nc2ccc(cc2[nH]1)c3cncc(Oc4ccc(F)cc4)c3		1	0.555556		MMV687248	MALARIA	Nc1nc2ccc(cc2[nH]1)c3cncc(Oc4ccc(F)cc4)c3		1	0.6875	110.725		MMV690103	KINETOPLASTIDS	C[C@@H](N(C)c1ncc2c(N)nc(N)nc2n1)c3ccc4CCCCc4c3		0	0.4375
MMV676159	KINETOPLASTIDS	Clc1cccc(CO[C@H]2CCc3ccccc3[C@@H]2n4ccnn4)c1		3	0		MMV676159	KINETOPLASTIDS	Clc1cccc(CO[C@H]2CCc3ccccc3[C@@H]2n4ccnn4)c1		4	0.1		MMV676159	KINETOPLASTIDS	Clc1cccc(CO[C@H]2CCc3ccccc3[C@@H]2n4ccnn4)c1		4	0.157895	80.7104									MMV676406	MALARIA	CC(C)n1ncc2c(cc(nc12)c3ccccc3)C(=O)NCC(N4CCOCC4)c5cccs5		0	0.5		MMV024195	TUBERCULOSIS	CN(C)CCNC(=O)N1CCCN(CC1)c2ncnc3cc(sc23)c4ccccc4		0	0.555556	105.867		MMV1030799	MALARIA	CCCn1c(NC(=O)c2ccc3ccccc3n2)nc4ccccc14		0	0.3125
MMV676501	KINETOPLASTIDS	Clc1ccc(s1)C(=O)Nc2oc(nn2)c3ccc(Cl)s3		2	0		MMV676501	KINETOPLASTIDS	Clc1ccc(s1)C(=O)Nc2oc(nn2)c3ccc(Cl)s3		4	0																	MMV676411	KINETOPLASTIDS	CC(Oc1ccccc1)C(=O)Nc2nc(cs2)c3ccccn3		0	0.5		MMV024937	MALARIA	FC(F)(F)c1nc(oc1C(=O)Nc2ccc(nc2)N3CCNCC3)c4ccccc4		0	0.625	69.6748		MMV688313	SCHISTOSOMIASIS	COc1ccc(cc1OC)-c1nnc2ccc(cn12)-c1cccc(c1)C(C)C		0	0.277778
MMV676589	LYMPHATIC FILARIASIS	O=C(CCC1CCCCC1)Nc2cccc(c2)c3oc(nn3)c4occc4		2	0.181818		MMV676589	LYMPHATIC FILARIASIS	O=C(CCC1CCCCC1)Nc2cccc(c2)c3oc(nn3)c4occc4		4	0.2		MMV676589	LYMPHATIC FILARIASIS	O=C(CCC1CCCCC1)Nc2cccc(c2)c3oc(nn3)c4occc4		4	0.166667	144.945									MMV663250	KINETOPLASTIDS	Clc1cccc(c1)C(c2ccc(CN3CCNCC3)cc2)n4ccnc4		1	0.666667		MMV026490	MALARIA	O=C(NCCc1ccccc1)c2cc(cnc2NCC3CC3)c4cccnc4		0	0.575758	85.9169		MMV689437	KINETOPLASTIDS	CC(N(C)c1ncc2c(N)nc(N)nc2n1)c3cc(Cl)cc(Cl)c3		0	0.166667
MMV687730	KINETOPLASTIDS	CCCCOC(=O)Nc1cc2nc([nH]c2cc1N3CCCC3)C4CCCCC4		3	0.15		MMV687730	KINETOPLASTIDS	CCCCOC(=O)Nc1cc2nc([nH]c2cc1N3CCCC3)C4CCCCC4		4	0.388889																	MMV676477	KINETOPLASTIDS	CCC1=C(C)N=C(NC1=O)n2nc(C)cc2NC(=O)c3ccccc3SC		1	0.95		MMV085071	MALARIA	COc1cncc(c1)c2cncc(n2)N3CCN(CC3)c4ccncc4		0	0.6875	103.016		MMV031011	MALARIA	CNC(=O)C1Cc2c([nH]c3cc(Cl)ccc23)C4(CCN(CCc5ccccc5)CC4)N1		0	0.393939
MMV688270	KINETOPLASTIDS	COc1ccc(cc1)-c1cnc2cnc(cn12)-c1cccc(OC(C)C)c1		2	0.0454545		MMV688270	KINETOPLASTIDS	COc1ccc(cc1)-c1cnc2cnc(cn12)-c1cccc(OC(C)C)c1		4	0																	MMV687775	KINETOPLASTIDS	CC1(C)OB(O)c2ccc(cc12)C3=NOC(C3)(c4cc(Cl)c(F)c(Cl)c4)C(F)(F)F		0	1		MMV099637	MALARIA	Cc1nn2c(O)c3CCCCc3nc2c1c4ccc(F)cc4		0	0.509091	113.447		MMV688362	KINETOPLASTIDS	COc1cc(cc2cc(oc12)c3ccc(cc3)C4=NCCN4)C5=NCCN5		0	0.030303
MMV688352	KINETOPLASTIDS	Clc1ccc(cc1)[C@@H]2[C@H](Oc3ccccc3)C(=O)N2CCn4cnc5c(NCc6ccccc6)ncnc45		3	0.136364		MMV688352	KINETOPLASTIDS	Clc1ccc(cc1)[C@@H]2[C@H](Oc3ccccc3)C(=O)N2CCn4cnc5c(NCc6ccccc6)ncnc45		4	0.1		MMV688352	KINETOPLASTIDS	Clc1ccc(cc1)[C@@H]2[C@H](Oc3ccccc3)C(=O)N2CCn4cnc5c(NCc6ccccc6)ncnc45		4	0.157895	68.0969									MMV688514	MALARIA	NC(=N)c1ccc(cc1)c2cc(on2)c3ccccc3		1	0.65		MMV200748	MALARIA	COc1ccc(cc1)C2(CCCC2)C(=O)Nc3ccc(Br)cc3		1	0.5	91.05		MMV024035	MALARIA	O=C(Nc1ccccc1)c2ccc(s2)c3cc4ccncc4cc3OC5CCNCC5		0	0.454545
MMV688939	KINETOPLASTIDS	Cc1ccc2nc(C)c(c3ccn(Cc4ccccc4)n3)n2c1		3	0		MMV688939	KINETOPLASTIDS	Cc1ccc2nc(C)c(c3ccn(Cc4ccccc4)n3)n2c1		4	0		MMV688939	KINETOPLASTIDS	Cc1ccc2nc(C)c(c3ccn(Cc4ccccc4)n3)n2c1		4	0.111111	95.7234									MMV688934	MALARIA	CCc1nn(C)c(C(=O)NCc2ccc(Oc3ccc(C)cc3)cc2)c1Cl		1	0.55		MMV393995	MALARIA	Cc1cc(O)nc(n1)n2nc(C)cc2C		0	0.575758	93.1411		MMV688467	KINETOPLASTIDS	CCCCN(CCCC)c1c(cc(cc1C#N)S(=O)(=O)Nc2ccccc2)C#N		0	0.272727
MMV688991	KINETOPLASTIDS	CC(=O)Oc1ccccc1C(=O)Nc2ncc(s2)[N+](=O)[O-]		2	0.2		MMV688991	KINETOPLASTIDS	CC(=O)Oc1ccccc1C(=O)Nc2ncc(s2)[N+](=O)[O-]		4	0.297297																	MMV690027	KINETOPLASTIDS	COC1=C(OCCCCOC2=CC=C(C3=NNN=N3)C=C2)C=C(C([C@@H]4[C@H]5CC=CC4)=NN(C6CCCCCC6)C5=O)C=C1		0	0.567568		MMV676270	MALARIA	C[C@@H](N1CCCC[C@@H]1c2ccc(OCc3cccc(F)c3)cc2)C(=O)N		0	0.5	88.0975		MMV659004	KINETOPLASTIDS	Cc1nc(nc(N2CCC(Cc3ccccc3)C2)c1Cl)c4ccccn4		0	0.333333
MMV689480	MALARIA	O=C1C(CC2CCC(C(C)(C)C)CC2)=C(C(C3=C1C=CC=C3)=O)O		3	0.2		MMV689480	MALARIA	O=C1C(CC2CCC(C(C)(C)C)CC2)=C(C(C3=C1C=CC=C3)=O)O		2	0.189189																	MMV010764	REFERENCE	C(Nc1nn2c(cnc2s1)c3cccs3)C4CCOCC4	Nifurtimox	0	0.55		MMV676350	MALARIA	Cc1cnc(CCNC(=O)c2cc(cs2)c3ccc(Cl)cc3)[nH]1		0	0.509091	79.6827		MMV688279	KINETOPLASTIDS	CC1=Nc2ccc(Cl)cc2C(O)(N1CCN3CCCCC3)c4ccc(C)cc4		0	0.375
MMV687706	KINETOPLASTIDS	C1CN(CCN1)c2cc(n[nH]2)c3ccc(Oc4ccccc4)cc3		2	0.05		MMV687706	KINETOPLASTIDS	C1CN(CCN1)c2cc(n[nH]2)c3ccc(Oc4ccccc4)cc3		2	0.15																	MMV011765	KINETOPLASTIDS	FC(F)(F)c1cnc(Sc2oc(nn2)c3ccncc3)c(Cl)c1		1	0.777778		MMV676398	MALARIA	CCS(=O)(=O)N(Cc1occc1)Cc2cc3ccc(C)cc3nc2O		0	0.5	55.5496		MMV688766	SCHISTOSOMIASIS	COc1ccc(c(O)c1)c2onc(c2c3ccc(Cl)cc3)C(F)(F)F		0	0.1875
MMV688774	KINETOPLASTIDS	CC[C@@H]([C@H](C)O)N1N=CN(C1=O)c2ccc(cc2)N3CCN(CC3)c4ccc(OC[C@@H]5CO[C@](Cn6cncn6)(C5)c7ccc(F)cc7F)cc4		3	0.2		MMV688774	KINETOPLASTIDS	CC[C@@H]([C@H](C)O)N1N=CN(C1=O)c2ccc(cc2)N3CCN(CC3)c4ccc(OC[C@@H]5CO[C@](Cn6cncn6)(C5)c7ccc(F)cc7F)cc4		4	0.243243																	MMV016838	LYMPHATIC FILARIASIS	Cc1ccc(cc1)-c1cc(c2cc(ccc2n1)Br)C(=O)Nc1cccnc1		1	0.666667		MMV676599	MALARIA	CC(C)(C)n1nc(Cc2cccc3ccccc23)c4c(N)ncnc14		0	0.625	85.4596		MMV021013	TUBERCULOSIS	C1CCC(CC1)Nc2cc(nc(n2)c3ccccn3)C4CC4		0	0.151515
MMV001493	MALARIA	COC(=O)C1=C(C)NC(=C(C1c2cccc3nonc23)C(=O)OC(C)C)C		2	0.15		MMV393144	KINETOPLASTIDS	CN1CCN(CC1)c2nccc3[nH]c(cc23)c4cccc(F)c4		2	0.1		MMV393144	KINETOPLASTIDS	CN1CCN(CC1)c2nccc3[nH]c(cc23)c4cccc(F)c4		4	0.157895	66.3172									MMV026020	MALARIA	CS(=O)(=O)c1cccc(c1)c2cnc3[nH]cc(c4ccc(CCC(=O)O)cc4)c3c2		0	0.6		MMV676877	MALARIA	OCCNc1ccc(cc1)C(=O)C2C[C@H]2c3ccc(Cl)cc3		0	0.625	93.3079		MMV001561	KINETOPLASTIDS	CNCCC(Oc1ccc(cc1)C(F)(F)F)c2ccccc2		0	0.333333
MMV002817	KINETOPLASTIDS	Oc1c(I)cc(I)c2cccnc12		2	0.1		MMV676480	KINETOPLASTIDS	COC(=O)c1c2CCN(Cc3ccccc3)Cc2sc1NC(=O)C4=Cc5ccccc5OC4=O		3	0.222222		MMV689480	MALARIA	O=C1C(CC2CCC(C(C)(C)C)CC2)=C(C(C3=C1C=CC=C3)=O)O		2	0.277778	71.7227									MMV028694	KINETOPLASTIDS	OCCc1ccc(Nc2nccc(n2)c3nnc4ccccn34)cc1		1	0.555556		MMV688411	MALARIA	Nc1ncnc2n(CC3CCNCC3)nc(-c3cnc4ccccc4c3)c12		0	0.5	168.694
MMV010576	MALARIA	COc1cc(ccc1O)c2cc(cnc2N)c3ccc(cc3)S(=O)(=O)C		2	0.1		MMV688313	MALARIA	COc1ccc(cc1OC)-c1nnc2ccc(cn12)-c1cccc(c1)C(C)C		2	0.166667		MMV659010	KINETOPLASTIDS	FC(F)(F)c1cc(NCCc2ccccc2)nc(n1)c3ccccn3		4	0.393939	58.7115									MMV031011	MALARIA	CNC(=O)C1Cc2c([nH]c3cc(Cl)ccc23)C4(CCN(CCc5ccccc5)CC4)N1		0	0.513514		MMV688470	MALARIA	CS(=O)(=O)N1CCC(CCn2nc(Cc3cccc4ccccc34)c3c(N)ncnc23)CC1		0	0.509091	90.6814
MMV019189	TUBERCULOSIS	Cc1ccc2c(NC(=O)C23NN=C(S3)c4ccccc4)c1C		2	0		MMV688124	KINETOPLASTIDS	CCc1ccc(cc1)S(=O)(=O)Nc2cc(CN3CCN(CCC(C)C)CC3)ccc2C		2	0.444444		MMV687243	MALARIA	NC(=O)c1cc(Br)ccc1OCCOc2ccccc2		2	0	110.146																MMV688472	MALARIA	CC(Oc1cccc(Cl)c1)C(=O)Nc1ccc2oc(nc2c1)-c1ccncc1		0	0.563636	108.782
MMV019742	WOLBACHIA LF	Cc1ccc(cc1)S(=O)(=O)N2CCN(CC2)C(=O)c3cc([nH]n3)c4ccccc4		2	0.454545		MMV023953	KINETOPLASTIDS	O=C(Nc1cccc(c1)c2ccc(NCCCN3CCCC3)nc2)c4ccccc4		2	0.459459		MMV687729	MALARIA	OC[C@H]1CN(C(=O)O1)c2cc(F)c(C3=CCN(Cc4ccccc4)CC3)c(F)c2		2	0.1875	126.632																MMV688474	MALARIA	COc1cc(ccc1n2cc(nn2)c3cccc(c3)C4=NCCN4)C5=NCCN5		0	0.5	77.1914
MMV020623	KINETOPLASTIDS	Cc1onc(C)c1C(=O)N2CCCC(C2)c3[nH]c4c(C)cccc4c3c5ccncc5		4	0.35		MMV102872	CRYPTOSPORIDIOSIS	FC(F)(F)c1cccc(c1)C(=O)Nc2oc(nn2)c3ccc(Cl)cc3		4	0.25		MMV688934	MALARIA	CCc1nn(C)c(C(=O)NCc2ccc(Oc3ccc(C)cc3)cc2)c1Cl		2	0.454545	72.7914																MMV688550	MALARIA	CCc1ccccc1n2c(C)cn3c4C(=O)N(C(C(C)C)C(=O)OC)C(=O)N(C)c4nc23		0	0.636364	107.795
MMV024114	KINETOPLASTIDS	Cc1ccc(cc1)S(=O)(=O)n2cc(c3ccnc(N)c3)c4cc(Br)cnc24		2	0.45		MMV658988	KINETOPLASTIDS	CN(CCc1ccccc1)c2nc(nc(C)c2Cl)c3ccccn3		4	0.189189																								MMV001499	MALARIA	CC1CS(=O)(=O)CCN1\N=C\c2oc(cc2)[N+](=O)[O-]		0	0.625	223.9
MMV063404	TOXOPLASMOSIS	Cc1nn(Cc2ccccc2)c(Cl)c1C(=O)NC3CCCCCC3		2	0.0454545		MMV658993	KINETOPLASTIDS	Cc1nc(nc(NCCc2ccc(cc2)S(=O)(=O)C)c1Cl)c3ccccn3		4	0.166667																								MMV007803	MALARIA	Clc1ccccc1CSCc2oc(cc2)C(=O)NC3CC3		1	0.5625	113.885
MMV667494	KINETOPLASTIDS	FC1(F)CCN(CCCCNc2cc(c3cc(ccc3n2)Cl)C(=O)NCCN2CCCC2)CC1		2	0.3		MMV667494	KINETOPLASTIDS	FC1(F)CCN(CCCCNc2cc(c3cc(ccc3n2)Cl)C(=O)NCCN2CCCC2)CC1		4	0.388889																								MMV016838	LYMPHATIC FILARIASIS	Cc1ccc(cc1)-c1cc(c2cc(ccc2n1)Br)C(=O)Nc1cccnc1		0	1	145.701
MMV671636	KINETOPLASTIDS	CC1=C(C(=O)c2c(F)cc(F)cc2N1)c3ccc(Oc4ccc(OC(F)(F)F)cc4)cc3		2	0.45		MMV675968	SCHISTOSOMIASIS	COc1ccc(OC)c(NCc2ccc3nc(N)nc(N)c3c2Cl)c1		2	0.05																								MMV019742	WOLBACHIA LF	Cc1ccc(cc1)S(=O)(=O)N2CCN(CC2)C(=O)c3cc([nH]n3)c4ccccc4		1	0.836364	82.6076
MMV676382	KINETOPLASTIDS	Cn1ncc2c(nc(NCCc3c[nH]c4ccccc34)nc12)N1CCOCC1		4	0.45		MMV675996	MALARIA	COc1ccc(cc1)N(CCc2cccc(C)n2)C(=O)C3CCCCC3		2	0.2																								MMV019790	MALARIA	CCOc1ccccc1C(=O)Nc2cccc(c2)c3nc4ncccn4c3C		0	0.625	106.774
MMV676383	DENGUE	CCC(Sc1oc2ccccc2n1)C(=O)Nc3nccs3		2	0.181818		MMV688364	KINETOPLASTIDS	CC(C)(C)OC(=O)N1CCC(Cn2nc(-c3cnc4ccccc4c3)c3c(N)ncnc23)CC1		4	0.444444																								MMV020512	MALARIA	Cc1ccc(Oc2ccc(NC(=O)CNc3ccccc3N4CCCC4=O)cc2)cc1		0	0.555556	77.0367
MMV676406	MALARIA	CC(C)n1ncc2c(cc(nc12)c3ccccc3)C(=O)NCC(N4CCOCC4)c5cccs5		2	0.272727		MMV688469	KINETOPLASTIDS	Nc1ncnc2[nH]nc(Cc3cccc4ccccc34)c12		2	0.333333																								MMV020537	MALARIA	Clc1ccc2OCCN(c3ccc(s3)C(=O)NC4CC4)c2c1		0	0.5	83.4724
MMV676411	KINETOPLASTIDS	CC(Oc1ccccc1)C(=O)Nc2nc(cs2)c3ccccn3		2	0.297297		MMV688771	MALARIA	Cc1ccccc1C(=O)N2N=C(Nc3ccccc3)SC2(C)C		2	0.1
MMV676472	KINETOPLASTIDS	COc1cccc(OC)c1C(=O)Nc2ccc(Cl)c(c2)c3nc4ccccc4s3		2	0.4
MMV676602	KINETOPLASTIDS	CNC(=O)c1nn(C)c2c3nc(Nc4ccc(cc4)N5CCN(C)CC5)ncc3CC(C)(C)c12		3	0.363636
MMV676881	KINETOPLASTIDS	CCn1cnc2c(Nc3cc(F)cc(F)c3)nc(nc12)C#N		4	0.351351
MMV687248	MALARIA	Nc1nc2ccc(cc2[nH]1)c3cncc(Oc4ccc(F)cc4)c3		2	0.3
MMV687703	KINETOPLASTIDS	COc1cccc(n1)c2nc3c(cccc3n2CC4CCCN4)N5CCCC5		4	0.35
MMV687765	KINETOPLASTIDS	Cc1cnc(nc1Oc2ccc(cc2)n3ccnc3)N4CCN[C@@H](Cc5ccccc5)C4		4	0.3
MMV688273	TUBERCULOSIS	Nc1ccc2ncnc(Nc3ccc(OCc4cccc(F)c4)c(Cl)c3)c2c1		4	0.3
MMV688514	MALARIA	NC(=N)c1ccc(cc1)c2cc(on2)c3ccccc3		2	0.181818
MMV688846	MALARIA	Cc1ccccc1CN2CCC(O)(CC2)c3ccc(Cl)c(c3)C(F)(F)F		2	0.1
MMV688943	MALARIA	CC1COC(Cn2cncn2)(O1)c3ccc(Oc4ccc(Cl)cc4)cc3Cl		2	0.136364
MMV689758	DENGUE	COc1nc2ccc(Br)cc2cc1[C@@H](c3ccccc3)[C@@](O)(CCN(C)C)c4cccc5ccccc45		2	0.318182
MMV690027	KINETOPLASTIDS	COC1=C(OCCCCOC2=CC=C(C3=NNN=N3)C=C2)C=C(C([C@@H]4[C@H]5CC=CC4)=NN(C6CCCCCC6)C5=O)C=C1		2	0.35
[truncated: 2 more columns]

## Sheet: Table S5
Venn diagramm						UCSD scores			Swiss TPH scores			FIOCRUZ (% viability) 72 h
Rack	Position	COMPOUND ID	Disease Set	SMILES	TRIVIAL NAME	24 h	48 h	72h	24 h	48 h	72 h	mean	SD
PathogenBox_PlateC	C03	MMV688283	KINETOPLASTIDS	CN1CCN(CC1)S(=O)(=O)c2ccc(cc2)c3ccc4c(Nc5ncc(Cl)cn5)ccnc4c3		2	4	4	0.6	0.611111	0.625	32.4102	3.95945
PathogenBox_PlateC	E08	MMV690102	KINETOPLASTIDS	COc1ccc(Oc2ccc(cc2)[C@@H](C)N(C)c3ncc4c(N)nc(N)nc4n3)cc1		4	4	4	0.526316	0.5	0.5	4.73538	1.18179
PathogenBox_PlateE	C06	MMV689244	KINETOPLASTIDS	FC(F)(F)c1ccc(cc1)N2CCN(CC2)C(=O)[C@@H](c3ccc(Cl)cc3)c4cccnc4		0	2	4	0.75	0.722222	0.75	46.7742	12.2227
PathogenBox_PlateE	G08	MMV658988	KINETOPLASTIDS	CN(CCc1ccccc1)c2nc(nc(C)c2Cl)c3ccccn3		1	4	4	0	0.189189	0.69697	20.6685	7.01198
PathogenBox_PlateB	H09	MMV020391	MALARIA	CC(C)C(C(=O)Nc1ccc(cc1)S(=O)(=O)N(C)C)c2ccc(Cl)cc2		2	4	4	0.954545	0.85	1	29.4612	1.72985
PathogenBox_PlateD	B07	MMV022029	MALARIA	CN1CCC(CC1)NCc2cccc(c2)c3ccc(cc3)S(=O)(=O)NCc4ccccc4		0	2	4	0.6	0.783784	0.939394	19.2103	11.8336
PathogenBox_PlateD	C07	MMV024114	MALARIA	Cc1ccc(cc1)S(=O)(=O)n2cc(c3ccnc(N)c3)c4cc(Br)cnc24		2	3	3	0.45	0.567568	0.515152	4.54628	8.18063
PathogenBox_PlateD	D11	MMV024406	MALARIA	Clc1cccc(NC(=O)c2cnc(N3CCN(CC3)c4ccncc4)c(Cl)c2)c1		2	4	4	0.8	0.945946	1	3.66635	3.9982
PathogenBox_PlateD	E02	MMV023233	MALARIA	Nc1nccc2ccc(cc12)c3ccc4nccn4c3		4	4	4	0.567568	0.777778	0.75	41.053	19.453
PathogenBox_PlateD	H03	MMV022478	MALARIA	Clc1cccc(c1)c2cnn3ccc(nc23)C(=O)Nc4ccc(cc4)N5CCNCC5		2	4	4	0.72973	0.777778	0.9375	7.6983	8.71804
PathogenBox_PlateA	A05	MMV689758	REFERENCE	COc1nc2ccc(Br)cc2cc1[C@@H](c3ccccc3)[C@@](O)(CCN(C)C)c4cccc5ccccc45	Bedaquiline	2	4	4	0.318182	0.8	0.945455	7.22669	3.69101
PathogenBox_PlateB	B06	MMV687800	REFERENCE	CC(C)N=C1C=C2N(c3ccc(Cl)cc3)c4ccccc4N=C2C=C1Nc5ccc(Cl)cc5	Clofazimine	4	4	4	1	1	1	16.5894	0.224074
PathogenBox_PlateB	H03	MMV000014	REFERENCE	O[C@H]([C@H]1CCCCN1)c2cc(nc3c(cccc23)C(F)(F)F)C(F)(F)F	Mefloquine	4	4	4	0.954545	1	1	-0.138817	1.68344
PathogenBox_PlateB	A11	MMV688761	SCHISTOSOMIASIS	CS(=O)(=O)c1ccc(cc1[N+](=O)[O-])C(=O)N(CC2CCCO2)c3nc4ccccc4s3		4	4	4	1	1	1	-7.95694	2.49397
PathogenBox_PlateB	C11	MMV688763	SCHISTOSOMIASIS	CNc1nnc(SC2=C(Cl)C(=O)N(N=C2)c3ccccc3)s1		4	4	4	1	1	1	-5.82868	4.92344
PathogenBox_PlateB	D11	MMV688762	SCHISTOSOMIASIS	C1CCN(C1)C(c2ccccn2)c3c([nH]c4ccccc34)c5ccccc5		4	4	4	1	1	1	-3.39538	3.72194
PathogenBox_PlateB	G10	MMV688768	SCHISTOSOMIASIS	CN1CCN(CC1)C(c2cccs2)c3c(C)[nH]c4ccccc34		3	4	4	1	1	1	6.43398	3.25935
PathogenBox_PlateD	A08	MMV688178	SCHISTOSOMIASIS	O(c1ccccc1)c1ccc(cc1)-c1cncc(n1)-c1ccc2[nH]ccc2c1		0	0	2	0.6	1	1	3.06398	8.47624
PathogenBox_PlateB	F05	MMV637229	TRICHURIASIS	ClC1=CC=C([C@@](C)(C2=CC=CC=C2)OCCC3N(C)CCC3)C=C1	Clemastine	2	4	4	0.9	1	1	46.5916	30.3845
PathogenBox_PlateA	B10	MMV102872	TUBERCULOSIS	FC(F)(F)c1cccc(c1)C(=O)Nc2oc(nn2)c3ccc(Cl)cc3		0	4	4	0.0909091	0.25	0.945455	-9.98354	3.73931
PathogenBox_PlateA	B11	MMV676477	TUBERCULOSIS	CCC1=C(C)N=C(NC1=O)n2nc(C)cc2NC(=O)c3ccccc3SC		0	1	3	0.272727	0.95	1	-1.12847	3.93966
PathogenBox_PlateA	D04	MMV661713	TUBERCULOSIS	Brc1cncc(c1)c2cc(NCCCn3ccnc3)nc(n2)c4ccccc4		1	4	4	0.272727	0.65	0.672727	12.8791	10.0789
PathogenBox_PlateA	D09	MMV676383	TUBERCULOSIS	CCC(Sc1oc2ccccc2n1)C(=O)Nc3nccs3		2	4	4	0.181818	1	1	7.05788	0.271453
PathogenBox_PlateA	F04	MMV676388	TUBERCULOSIS	COc1cccc(c1)n2nnnc2S(=O)(=O)Cc3ccccc3		4	4	4	1	1	1	-7.15087	7.46542
PathogenBox_PlateA	H09	MMV461553	TUBERCULOSIS	COC(=O)c1c2CCCCCc2sc1NC(=O)c3c(F)c(F)c(F)c(F)c3F		2	4	4	1	1	1	0.614913	1.87409
PathogenBox_PlateC	A05	MMV688122	TUBERCULOSIS	Cc1cccc(n1)c2nc(Nc3ccncn3)c4sccc4n2		1	3	4	0.405405	0.666667	0.75	39.9131	29.6609
PathogenBox_PlateC	C06	MMV687251	TUBERCULOSIS	CN1C(=O)N(C)c2nsc(c2C1=O)S(=O)(=O)C		4	4	4	1	1	1	-0.448452	3.38946
PathogenBox_PlateC	F04	MMV023969	TUBERCULOSIS	C(Nc1cccnc1)c2ccc(s2)c3cc4ccncc4cc3OC5CCNCC5		3	3	4	0.136364	0.45	0.555556	14.8115	8.36742
PathogenBox_PlateC	F08	MMV687807	TUBERCULOSIS	Oc1ccc(Cl)cc1C(=O)Nc2ccc(c(c2)C(F)(F)F)C(F)(F)F		4	4	4	1	1	1	35.4318	3.78174
PathogenBox_PlateC	G04	MMV021660	TUBERCULOSIS	Cc1cc(NCCc2ccccc2)nc(NC(=N)Nc3ccc(Cl)cc3)n1		4	4	4	1	1	1	8.49962	0.0507279
PathogenBox_PlateC	G06	MMV687273	TUBERCULOSIS	CC(=CCC\C(=C/CNCCNC1C2CC3CC(CC1C3)C2)\C)C		4	4	4	1	1	1	13.4938	10.231
PathogenBox_PlateD	F11	MMV687812	TUBERCULOSIS	CN1CCN(CCCOc2ncc(Nc3ncc(nc3C(=O)N)c4ccc(c(F)c4)C(F)(F)F)cn2)CC1		3	3	3	1	1	1	5.19952	11.5684
PathogenBox_PlateE	E11	MMV153413	TUBERCULOSIS	CCOC(=O)c1c(C)c(sc1NC(=O)c2c(F)c(F)c(F)c(F)c2F)C(=O)N		4	4	4	1	1	1	-3.41811	1.71405
PathogenBox_PlateE	F08	MMV272144	TUBERCULOSIS	COc1cccc(c1)n2nnnc2S(=O)(=O)C		4	4	4	1	1	1	-0.214395	2.1848
PathogenBox_PlateE	C08	MMV687765	TUBERCULOSIS	Cc1cnc(nc1Oc2ccc(cc2)n3ccnc3)N4CCN[C@@H](Cc5ccccc5)C4		4	4	4	0.3	0.555556	1	17.7949	15.1557

## Sheet: Table S6
COMPOUND ID	Disease Set	SMILES	Trivial Name	UCSD 72 h	Swiss TPH 72 h	FIOCRUZ data 72 h (x̅)
MMV000014	REFERENCE	O[C@H]([C@H]1CCCCN1)c2cc(nc3c(cccc23)C(F)(F)F)C(F)(F)F	Mefloquine	1	1	0.833298
MMV689758	REFERENCE	COc1nc2ccc(Br)cc2cc1[C@@H](c3ccccc3)[C@@](O)(CCN(C)C)c4cccc5ccccc45	Bedaquiline	1	0.927273	0.764795
MMV687800	REFERENCE	CC(C)N=C1C=C2N(c3ccc(Cl)cc3)c4ccccc4N=C2C=C1Nc5ccc(Cl)cc5	Clofazimine	1	1	0.677717
MMV688978	REFERENCE	CCP(=[Au]S[C@H]1O[C@@H](COC(=O)C)[C@H](OC(=O)C)[C@@H](OC(=O)C)[C@@H]1OC(=O)C)(CC)CC	Auranofin	1	1	0
MMV688991	REFERENCE	CC(=O)Oc1ccccc1C(=O)Nc2ncc(s2)[N+](=O)[O-]	Nitazoxanide	1	0.407407	0
MMV688774	REFERENCE	CC[C@@H]([C@H](C)O)N1N=CN(C1=O)c2ccc(cc2)N3CCN(CC3)c4ccc(OC[C@@H]5CO[C@](Cn6cncn6)(C5)c7ccc(F)cc7F)cc4	Posaconazole	1	0.407407	0.00582846
MMV002529	REFERENCE	O=C(C1CCCCC1)N2CC3N(CCc4ccccc34)C(=O)C2	Praziquantel	1	0.407407	0
MMV689480	REFERENCE	O=C1C(CC2CCC(C(C)(C)C)CC2)=C(C(C3=C1C=CC=C3)=O)O	Buparvaquone	0.5	0.037037	0.164948
MMV001499	REFERENCE	CC1CS(=O)(=O)CCN1\N=C\c2oc(cc2)[N+](=O)[O-]	Nifurtimox	0	0.5	0
MMV001625	REFERENCE	NCCCC(N)(C(F)F)C(=O)O	alpha-Difluoromethylornithine	0	0	0.0221444
MMV687796	REFERENCE	NCCC(O)C(=O)N[C@@H]1C[C@H](N)[C@@H](OC2O[C@H](CN)[C@@H](O)[C@H](O)[C@H]2O)[C@H](O)C1OC3O[C@H](CO)[C@@H](O)[C@H](N)[C@H]3O	Amikacin	0	0	0
MMV689000	REFERENCE	C[C@@H]1OC(=O)C[C@H](O)C[C@H](O)CC[C@@H](O)[C@H](O)C[C@H](O)C[C@]2(O)C[C@H](O)[C@H]([C@H](C[C@@H](O[C@@H]3O[C@H](C)[C@@H](O)[C@H](N)[C@@H]3O)\C=C\C=C\C=C\C=C\C=C\C=C\C=C\[C@H](C)[C@@H](O)[C@H]1C)O2)C(=O)O	Amphotericin B	0	0	0
MMV688773	REFERENCE	[O-][N+](=O)c1nccn1CC(=O)NCc2ccccc2	Benznidazole	0	0	0.00201469
MMV002816	REFERENCE	CCN(CC)C(=O)N1CCN(C)CC1	Diethylcarbamazine	0	0.166667	0
MMV000011	REFERENCE	C[C@@H]1[C@H]2[C@H](O)[C@H]3[C@H](N(C)C)C(=C(C(=O)N)C(=O)[C@@]3(O)C(=C2C(=O)c4c(O)cccc14)O)O	Doxycycline	0	0	0
MMV687801	REFERENCE	CC[C@H](CO)NCCN[C@H](CC)CO	Ethambutol	0	0.037037	0.103458
MMV687798	REFERENCE	C[C@H]1COc2c(N3CCN(C)CC3)c(F)cc4C(=O)C(=CN1c24)C(=O)O	Levofloxacin (-)-ofloxacin	0	0	0.200479
MMV687803	REFERENCE	CC(=O)NC[C@@H]1CN(C(=O)O1)c2ccc(N3CCOCC3)c(F)c2	Linezolid	0	0	0
MMV003152	REFERENCE	COC(=O)Nc1nc2cc(ccc2[nH]1)C(=O)c3ccccc3	Mebendazole	0	0.037037	0.17059
MMV688990	REFERENCE	CCCCCCCCCCCCCCCCOP(=O)([O-])OCC[N+](C)(C)C	Miltefosine	0	0.030303	0
MMV000062	REFERENCE	NC(=N)c1ccc(OCCCCCOc2ccc(cc2)C(=N)N)cc1	Pentamidine	0	0	0.0705605
MMV000023	REFERENCE	COc1cc(NC(C)CCCN)c2ncccc2c1	Primaquine	0	0.111111	0.11208
MMV688775	REFERENCE	CO[C@H]1\C=C\O[C@@]2(C)OC3=C(C2=O)C4=C(O)\C(=C/NN5CCN(C)CC5)\C(=N\C(=O)\C(=C/C=C\[C@H](C)[C@H](O)[C@@H](C)[C@@H](O)[C@@H](C)[C@H](OC(=O)C)[C@@H]1C)\C)\C(=C4C(=C3C)O)O	Rifampicin	0	0	0
MMV000063	REFERENCE	CCN(CC)CCCCCCNc1cc(OC)cc2c(C)ccnc12	Sitamaquine	0	0	0.28059
MMV688994	REFERENCE	CNC1C(O)C(O)C(CO)OC1OC2C(OC3C(O)C(O)C(NC(=N)N)C(O)C3NC(=N)N)OC(C)C2(O)C=O	Streptomycin	0	0	0
MMV637953	REFERENCE	Cc1ccc(cc1NC(=O)c2cccc(NC(=O)Nc3cccc(c3)C(=O)Nc4cc(ccc4C)C(=O)Nc5ccc(c6cc(cc(c56)S(=O)(=O)O)S(=O)(=O)O)S(=O)(=O)O)c2)C(=O)Nc7ccc(c8cc(cc(c78)S(=O)(=O)O)S(=O)(=O)O)S(=O)(=O)O	Suramin	0	0.185185	0

## Sheet: Table S7
				Activity demonstrated in the current report							Anti - Schistosoma mansoni activity dataa		Anti - Schistosoma mansoni activity data b	Anti - Schistosoma mansoni activity datac			Cytotoxicity data			Analogues
Smiles	Rack	Position	MMV ID	UCSD 24 h	UCSD 48 h	UCSD 72 h	Swiss TPH 24 h	Swiss TPH 48 h	Swiss TPH 72 h	FIOCRUZ 72 h (mean ± SD)	Newly Transformed Schistosomula: inhibition at 10 μM at 72 h (%)	Newly Transformed Schistosomula: IC50 at 72 h (μM)	Adults: Effect at 10 μM after 48h	Larva IC50 (μM)	Juveniles IC50 (μM)	Adults IC50 (μM)	MRC5 CC50 (μM)a	CHO CC50 (μM)d	HepG2CC20 (μM)e
CS(=O)(=O)c1ccc(cc1[N+](=O)[O-])C(=O)N(CC2CCCO2)c3nc4ccccc4s3	Plate B	A11	MMV688761	4	4	4	1	1	1	-8.0 ± 2.5	100			0.29	3.22	4.8	6.19		6.94
CNc1nnc(SC2=C(Cl)C(=O)N(N=C2)c3ccccc3)s1	Plate B	C11	MMV688763	4	4	4	1	1	1	-5.8 ± 4.9	100	0.15			3.7				1.55
C1CCN(C1)C(c2ccccn2)c3c([nH]c4ccccc34)c5ccccc5	Plate B	D11	MMV688762	4	4	4	1	1	1	-3.4 ± 3.7	100	0.51		0.5	2.5	3.2	86		1	x
CN1CCN(CC1)C(c2cccs2)c3c(C)[nH]c4ccccc34	Plate B	G10	MMV688768	3	4	4	1	1	1	6.4 ± 3.3	100	0.29			3.8	7.2	>20		8.46
O(c1ccccc1)c1ccc(cc1)-c1cncc(n1)-c1ccc2[nH]ccc2c1	Plate D	A08	MMV688178	0	0	2	0.6	1	1	3.1 ± 8.5	100	0.27	active	1.4	2.1	3.7	20		25.7
Cn1ncc2c(nc(NCCc3c[nH]c4ccccc34)nc12)N1CCOCC1	Plate B	C04	MMV676382	4	4	4	0.45	0.68	0.94	61.7 ± 11.2	88	0.43	active						4.63	x
COc1ccc(cc1)-c1cnc2cnc(cn12)-c1cccc(OC(C)C)c1	Plate E	A10	MMV688270	2	4	4	0.05	0	0.11	39.0 ± 24.6	93	1.18	active	6.7	5.7	4.9	40.1		24.3
COc1ccc(c(O)c1)c2onc(c2c3ccc(Cl)cc3)C(F)(F)F	Plate E	D02	MMV688766	0	0	0	0.15	0.17	0.19	0.1 ± 0.4	20			3.36	7.02	5.3	8.31	>50		x
COc1ccc(cc1OC)-c1nnc2ccc(cn12)-c1cccc(c1)C(C)C	Plate C	H03	MMV688313	0	2	0	0.1	0.17	0.28	14.7 ± 1.7	79	5.69	active	6.6	4	1.6	18.6		7.5
Cc1ccccc1C(=O)N2N=C(Nc3ccccc3)SC2(C)C	Plate E	A04	MMV688771	1	2	0	0.05	0.1	0.16	62.2 ± 7.1	0			6.7	5.8	5.3	>50	>50	8
COCC(C)NC(=O)CSc1ncnc2sc(cc12)-c1ccccc1	Plate B	D04	MMV676536	0	0	0	0.1	0.14	0.11	75.5 ± 36.1	50		inactive						>80	x
CC(C(SC1=NC=CC=N1)=C2C)=NN2C(NC3=CC=CC(C(F)(F)F)=C3)=O	Plate E	F03	MMV688552	0	0	0	0.15	0.17	0.31	117.5 ± 14.6	33.3		active		4.05	2	85% cell death at 15 μM		30.7
CC(C)c1ccc(NC(=O)COC2=CC(=C(C#N)C(=O)N2C)C)cc1	Plate C	H06	MMV1198433	0	0	0	0.1	0.06	0	86.0 ± 19.9	13.3				3.88	7.2			>80
a Assays performed by the Keiser lab at the Swiss Tropical and Public Health Institute
b Phenotypic assays performed by the Caffrey group at the Center for Discovery and Innovation in Parasitic Diseases, Skaggs School of Pharmacy and Pharmaceutical Sciences, UC San Diego (www.cdipd.org)
c Screening data described more fully in the following publication: High throughput screening identifies novel lead compounds with activity against larval, juvenile and adult Schistosoma mansoni, Nuha Mansour, Ross Paveley, J. Mark F. Gardner, Andrew S. Bell, Tanya Parkinson and Quentin Bickle, PLoS Neglected Tropical Diseases, 2016 (http://dx.doi.org/10.1371/journal.pntd.0004659)
d Assays performed by the University of Cape Town
e Assay performed by Abbvie
Note: empty cell = "not tested"

## Sheet: Table S8
COMPOUND ID	Disease Set	SMILES	TRIVIAL NAME	UCSD 24	UCSD 48	UCSD 72	Swiss TPH 24 h	Swiss TPH 48 h	Swiss TPH 72 h	FIOCRUZ 72 h
MMV675968	CRYPTOSPORIDIOSIS	COc1ccc(OC)c(NCc2ccc3nc(N)nc(N)c3c2Cl)c1		0	0.5	0	0	0	0.037037	0
MMV675993	CRYPTOSPORIDIOSIS	COc1ccc(cc1OC)c2nn(C(C)C)c3ncnc(N)c23		0	0	0	0	0	0	0
MMV675994	CRYPTOSPORIDIOSIS	Clc1ccc(cc1)n2cc(COc3ccnc4ccccc34)nn2		0	0	0	0	0.236111	0.0833333	0
MMV676050	CRYPTOSPORIDIOSIS	CS(=O)(=O)N1CCC(Cn2nc(Cc3cccc4ccccc34)c5c(N)ncnc25)CC1		0	0	0	0	0.459459	0.515152	0			Pearson correlation	U+S	U+F	S+F
MMV676053	CRYPTOSPORIDIOSIS	COc1cc(NC(=O)CC2=NN(C)C(=O)c3ccccc23)ccc1Cl		0	0	0	0	0	0	0			24h	0.607952
MMV676182	CRYPTOSPORIDIOSIS	Nc1ncnc2c1c(Cc3cccc4ccccc34)nn2CC5CCNCC5		0	0	0	0	0	0	0			48h	0.634215
MMV676191	CRYPTOSPORIDIOSIS	CC(C)C(Oc1cccc2ccccc12)C(=O)O		0	0	0	0	0	0	0			72h	0.682739	0.455599	0.502494
MMV676599	CRYPTOSPORIDIOSIS	CC(C)(C)n1nc(Cc2cccc3ccccc23)c4c(N)ncnc14		0	0	0	0.0157895	0.0277778	0.5	0.0371879
MMV688853	CRYPTOSPORIDIOSIS	CCOc1ccc2cc(cnc2c1)c3nn(c(N)c3C(=O)N)C(C)(C)C		0	0	0	0.0736842	0.0540541	0.185185	0.132692
MMV688854	CRYPTOSPORIDIOSIS	CCOc1ccc2cc(ccc2c1)c3nn(CC4CCN(C)CC4)c5ncnc(N)c35		0	0	0	0	0	0.185185	0.419708			F distribution
MMV689255	CRYPTOSPORIDIOSIS	Nc1ncnc2c1ncn2C[C@@H](O)[C@@H](O)C(=O)O	D-Eritadenine	0	0	0	0	0	0	0.239563			24h	Linear regression U+S
MMV688350	DENGUE	COC(=O)c1ccc(F)cc1NS(=O)(=O)c2cccc(c2)c3cnn(Cc4ccccc4)c3		0.25	0.25	0.25	0.315789	0.3125	0.272727	0.00359484				Slope	0.698225	0.0824301	Intercept		F Distrib	8.68743e-42
MMV688352	DENGUE	Clc1ccc(cc1)[C@@H]2[C@H](Oc3ccccc3)C(=O)N2CCn4cnc5c(NCc6ccccc6)ncnc45		0.75	1	1	0	0	0	0.19867				±	0.0457079	0.0126176	±
MMV688416	DENGUE	CC(C)(C)OC(=O)N1CCN(CC1)c2nccc(n2)c3ccc(s3)c4ccc(Cl)cc4		0	0	0	0.0526316	0	0	0				r2	0.369606	0.227634	s(y)
MMV688543	DENGUE	CC(C)(C)C(=O)N(CCCCCCN1C[C@H](O)[C@@H](O)[C@H](O)[C@H]1CO)C2CCCCCC2		0	0.5	1	0.131579	0.444444	1	0				F	233.351	398	degrees of freedom
MMV688921	DENGUE	OC[C@H]1O[C@H](C(O)[C@H]1O)n2c3ccc(Cl)cc3c4c(ncnc24)c5oc6ccccc6c5		0	0	0	0.0249307	0	0	0				regression ss	12.0916	20.6233	residual ss
MMV003270	HOOKWORM	ClC1=CC(N=C(N)O2)=C2C=C1	Zoxazolamine	0	0	0	1	1	1	0.120378
MMV001561	KINETOPLASTIDS	CNCCC(Oc1ccc(cc1)C(F)(F)F)c2ccccc2	Fluoxetine	0	0	0	0	0	0.111111	0.64237			48h	Linear regression U+S
MMV004168	KINETOPLASTIDS	CN1CCCN(CC1)C(c2ccccc2)c3ccc(Cl)cc3		0	0	0	0.368421	0	0.0175439	0.200919				Slope	0.776922	0.0625277	Intercept		F Distrib	2.13018e-46
MMV045105	KINETOPLASTIDS	C1CN(CCO1)c2cc(n[nH]2)c3ccc(Oc4ccccc4)cc3		0	0	0	0.0157895	0.121622	0	0				±	0.0474752	0.0157544	±
MMV099637	KINETOPLASTIDS	Cc1nn2c(O)c3CCCCc3nc2c1c4ccc(F)cc4		0	0	0	0.315789	0.3125	0.345455	0				r2	0.402228	0.27212	s(y)
MMV1236379	KINETOPLASTIDS	CCOC(=O)c1noc(N)c1c2ccccc2		0	0	0	0	0	0	0				F	267.806	398	degrees of freedom
MMV188296	KINETOPLASTIDS	CNC(=O)C1Cc2ccccc2N1C(=O)Cc3ccc(F)cc3		0	0	0	0.105263	0	0	0.048515				regression ss	19.8309	29.4716	residual ss
MMV202553	KINETOPLASTIDS	CCC(=O)Nc1ccccc1C(=O)Nc2ccccn2		0.25	0	0	0	0.125	0	0.0202034
MMV595321	KINETOPLASTIDS	CC1=C(C)C(NC(N2N=C(C)C=C2NC(C3=CC=C(S(=O)(N(CC)CC)=O)C=C3)=O)=N1)=O		0	0	0	0	0	0	0.0822386			72h	Linear regression U+S					Linear regression U+F					Linear regression S+F
MMV652003	KINETOPLASTIDS	OB1OCc2ccc(NC(=O)c3ccccc3C(F)(F)F)cc12		0	0	0	0	0	0	0.170887				Slope	0.814923	0.0455532	Intercept		Slope	0.669605	0.108548	Intercept		Slope	0.618735	0.109565	Intercept
MMV658988	KINETOPLASTIDS	CN(CCc1ccccc1)c2nc(nc(C)c2Cl)c3ccccn3		0.25	1	1	0	0	0.59596	0.639779				±	0.0437157	0.0166355	±		±	0.0655805	0.0199204	±		±	0.0533627	0.0162092	±
MMV658993	KINETOPLASTIDS	Cc1nc(nc(NCCc2ccc(cc2)S(=O)(=O)C)c1Cl)c3ccccn3		0	1	1	0	0	0.333333	0.209614				r2	0.466132	0.27865	s(y)		r2	0.207571	0.339486	s(y)		r2	0.2525	0.276239	s(y)
MMV659004	KINETOPLASTIDS	Cc1nc(nc(N2CCC(Cc3ccccc3)C2)c1Cl)c4ccccn4		0	0	0	0.0157895	0	0.111111	0.864171				F	347.503	398	degrees of freedom		F	104.253	398	degrees of freedom		F	134.441	398	degrees of freedom
MMV659010	KINETOPLASTIDS	FC(F)(F)c1cc(NCCc2ccccc2)nc(n1)c3ccccn3		0.25	0.5	1	0	0.391892	0.191919	0.285959				regression ss	26.9821	30.9029	residual ss		regression ss	12.0152	45.8698	residual ss		regression ss	10.259	30.3706	residual ss
MMV675997	KINETOPLASTIDS	Fc1ccc(cc1)N2CCN(CCCCN(CC#N)C(=O)OCc3ccccc3)CC2		0	0	0	0	0	0	0
MMV675998	KINETOPLASTIDS	COc1ccc(cc1c2cn(nn2)c3ccc(cc3)C(=N)N)C(=N)N		0	0	0	0	0	0	0.187698				F Distrib	3.35407e-56				F Distrib	6.79584e-22				F Distrib	5.57283e-27
MMV676008	KINETOPLASTIDS	OC(=O)c1cccc2oc(nc12)c3cccc(O)c3NC(=O)c4cc(on4)c5ccccc5		0	0	0	0	0	0	0.0856701
MMV676048	KINETOPLASTIDS	Clc1ccc(Cl)c(CO[C@H]2CCCC[C@@H]2n3ccnc3)c1		0	0	0	0.0736842	0	0	0
MMV676057	KINETOPLASTIDS	CC(C)(C)OC(=O)N1CCN(CC1)c2cc(n[nH]2)c3ccc(Oc4ccccc4)cc3		0	0	0	0	0	0	0.217594
MMV676159	KINETOPLASTIDS	Clc1cccc(CO[C@H]2CCc3ccccc3[C@@H]2n4ccnn4)c1		0.75	1	1	0	0	0	0.0813583
MMV676161	KINETOPLASTIDS	C(N1CCOCC1)c2cc(n[nH]2)c3ccc(Oc4ccccc4)cc3		0	0	0	0	0	0	0.0330471
MMV676162	KINETOPLASTIDS	OC(=O)c1cccc2oc(nc12)c3ccccc3NC(=O)c4ccccc4		0	0	0	0	0	0	0.328531
MMV676186	KINETOPLASTIDS	COC(=O)c1cccc2oc(nc12)c3cccc(OC)c3NC(=O)c4cc(on4)c5ccccc5		0	0	0	0.248933	0.166667	0.0833333	0.0126762
MMV676600	KINETOPLASTIDS	CO[C@@H](C(=O)N1Cc2[nH]nc(NC(=O)c3ccc(cc3)N4CCN(C)CC4)c2C1)c5ccccc5		0	0	0	0.0157895	0.0540541	0.037037	0
MMV676602	KINETOPLASTIDS	CNC(=O)c1nn(C)c2c3nc(Nc4ccc(cc4)N5CCN(C)CC5)ncc3CC(C)(C)c12		0.75	1	1	0.263158	0.75	0.854545	0
MMV676604	KINETOPLASTIDS	CC(C)n1c(C)ncc1c2ccnc(Nc3ccc(cc3)S(=O)(=O)C)n2		0	0	0	0.0157895	0	0	0.20953
MMV687706	KINETOPLASTIDS	C1CN(CCN1)c2cc(n[nH]2)c3ccc(Oc4ccccc4)cc3		0.5	0.5	0.5	0	0	0.259259	0.597442
MMV687762	KINETOPLASTIDS	C1CC(CCO1)c2cc(n[nH]2)c3ccc(Oc4ccccc4)cc3		0	0	0	0.0526316	0.1875	0	0
MMV688179	KINETOPLASTIDS	NC(=N)Nc1ccc(c(Cl)c1)c2oc(cc2)c3ccc(NC(=N)N)cc3Cl		0	0	0	0	0	0	0.258312
MMV688180	KINETOPLASTIDS	Cc1nn(C)c(C)c1NS(=O)(=O)c2c(Cl)cc(cc2Cl)c3ccnc(c3)N4CCNCC4		0	0	0	0.0157895	0	0	0
MMV688271	KINETOPLASTIDS	NC(=N)Nc1ccc(cc1Cl)c2oc(cc2)c3ccc(N=C(N)N)c(Cl)c3		0	0	0	0	0	0	0
MMV688273	KINETOPLASTIDS	Nc1ccc2ncnc(Nc3ccc(OCc4cccc(F)c4)c(Cl)c3)c2c1		1	1	1	0.189474	0.527027	0.838384	0.312072
MMV688274	KINETOPLASTIDS	Fc1cccc(COc2ccc(Nc3ncnc4ccc(NC(=O)CN5CCOCC5)cc34)cc2Cl)c1		0	0	0	0.189474	0.0625	0	0
MMV688279	KINETOPLASTIDS	CC1=Nc2ccc(Cl)cc2C(O)(N1CCN3CCCCC3)c4ccc(C)cc4		0	0	0	0	0	0.166667	0.871357
MMV688283	KINETOPLASTIDS	CN1CCN(CC1)S(=O)(=O)c2ccc(cc2)c3ccc4c(Nc5ncc(Cl)cn5)ccnc4c3		0.5	1	1	0.536842	0.513889	0.5	0.530575
MMV688360	KINETOPLASTIDS	COc1ccc(cc1OCc2ccccn2)C3=NN(C4CCCCCC4)C(=O)C3(C)C		0.25	0	0	0.157895	0.25	0.2	0
MMV688361	KINETOPLASTIDS	C1CN=C(N1)c2ccc(cc2)c3cc(on3)c4cccc(c4)C5=NCCN5		0	0	0	0	0	0	0
MMV688362	KINETOPLASTIDS	COc1cc(cc2cc(oc12)c3ccc(cc3)C4=NCCN4)C5=NCCN5		0	0	0	0	0	0	0.786764
MMV688371	KINETOPLASTIDS	NCCN(C(=O)c1ccc(Cl)cc1Cl)c2ccc(OCc3ccc(Cl)cc3)cc2		0	0	0	0.305263	0.166667	0.0833333	0.62084
MMV688372	KINETOPLASTIDS	FC1=C(C=C(NC(=O)N2CCCC2)C=C1)C1=NC2=CC(=CN=C2N1)C1=CC=CC=C1		0	1	1	0.624467	0.583333	0.833333	0
MMV688407	KINETOPLASTIDS	COc1cc(ccc1c2cn(nn2)c3cccc(c3)C4=NCCN4)C5=NCCN5		0.25	0	0	0.131579	0.121622	0.191919	0.15474
MMV688410	KINETOPLASTIDS	CN(C)CC(=O)NCCN1C(c2ccccc2)c3cc(Cl)ccc3N=C1C		0	0	0	0.247368	0.166667	0.166667	0
MMV688415	KINETOPLASTIDS	CO[C@@H]1CN(C[C@H]1O)c2ccc(C#CC3(O)CN4CCC3CC4)c(Cc5ccccc5)n2		0	0	0	0	0	0	0
MMV688467	KINETOPLASTIDS	CCCCN(CCCC)c1c(cc(cc1C#N)S(=O)(=O)Nc2ccccc2)C#N		0	0	0	0.0157895	0	0.030303	0.455069
MMV688474	KINETOPLASTIDS	COc1cc(ccc1n2cc(nn2)c3cccc(c3)C4=NCCN4)C5=NCCN5		0.25	0	0	0.123755	0.0972222	0.333333	0.114087
MMV688514	KINETOPLASTIDS	NC(=N)c1ccc(cc1)c2cc(on2)c3ccccc3		0.5	0.25	0	0.0526316	0.5625	0.272727	0
MMV688547	KINETOPLASTIDS	COc1ccc(cc1c2cn(nn2)c3cccc(c3)C4=NCCN4)C5=NCCN5		0	0	0	0	0	0	0.0330807
MMV688550	KINETOPLASTIDS	CCc1ccccc1n2c(C)cn3c4C(=O)N(C(C(C)C)C(=O)OC)C(=O)N(C)c4nc23		0.25	0	0	0.0157895	0.256757	0.515152	0
MMV688754	KINETOPLASTIDS	CO\N=C(/C(=O)OC)\c1ccccc1CO\N=C(/C)\c2cccc(c2)C(F)(F)F	Trifloxystrobin	0.25	0	0	0	0	0	0
MMV688776	KINETOPLASTIDS	Cc1nn2C(=O)C3=C(CCCC3)Nc2c1c4ccc(Cl)cc4		0	0	0	0	0	0	0
MMV688793	KINETOPLASTIDS	Cc1onc(C)c1COc2cccc(c2)C(=O)Nc3ncccc3C		0	0	0	0	0	0	0
MMV688795	KINETOPLASTIDS	O=C(NCCc1ccn(n1)c2ccccc2)C3CCCCC3		0	0	0	0	0	0	0.14326
MMV688796	KINETOPLASTIDS	Fc1ccc(cc1)c2oc(cc2)C(=O)NCc3nnc4CCCCCn34		0.25	0	0	0	0	0	0
MMV688797	KINETOPLASTIDS	CC1CCCCN1C(=O)NCCc2coc(n2)c3ccc(F)cc3		0.25	0	0	0	0.0625	0	0
MMV688798	KINETOPLASTIDS	CS(=O)(=O)c1ccccc1C(=O)N(Cc2ccccc2)c3ccccc3		0	0.25	0	0.0526316	0.25	0.2	0
MMV688934	KINETOPLASTIDS	CCc1nn(C)c(C(=O)NCc2ccc(Oc3ccc(C)cc3)cc2)c1Cl	Tolfenpyrad	0.25	0.25	0.5	0.263158	0.4375	0.272727	0.155009
MMV688942	KINETOPLASTIDS	CC(C)(C)C(O)C(Oc1ccc(cc1)c2ccccc2)n3cncn3	Bitertanol	0.25	0	0	0	0	0	0
MMV688943	KINETOPLASTIDS	CC1COC(Cn2cncn2)(O1)c3ccc(Oc4ccc(Cl)cc4)cc3Cl	Difenoconazol	0.5	0.25	0.5	0	0.0625	0	0.391953
MMV688958	KINETOPLASTIDS	O=C(NCCc1csc(n1)c2ccccc2)c3ccccc3		0.25	0	0	0	0	0	0.0255921
MMV689028	KINETOPLASTIDS	O=C(N1CCN(CC2=CC=C(NS(=O)(C3=CC=C(C)C=C3)=O)C=C2)CC1)C4=CC(C#N)=CC=C4		0	0.25	0.25	0	0	0	0
MMV689029	KINETOPLASTIDS	O=C(N1CCN(CC2=CC=C(NS(=O)(C3=CC=C(OC)C=C3)=O)C=C2)CC1)C4=CC(C#N)=CC=C4		0	0	0.25	0	0	0	0
MMV689060	KINETOPLASTIDS	Clc1ccc(CN2CCN(CC2)C3=NCCN3)cc1Cl		0.25	0	0	0	0	0	0.0703486
MMV689061	KINETOPLASTIDS	CC1=C(F)C=CC=C1CN2CCCC(CC3=NC(C4=CC=C(NC(C)=O)C=C4)=NO3)C2		0	0	0	0	0	0	0
MMV689243	KINETOPLASTIDS	FC(F)(F)c1ccc(cc1)N(C2CCN(CC2)c3ccc(cn3)C(F)(F)F)c4cccnc4		0	0	0.25	0.0736842	0.0277778	0.0833333	0.111533
MMV689244	KINETOPLASTIDS	FC(F)(F)c1ccc(cc1)N2CCN(CC2)C(=O)[C@@H](c3ccc(Cl)cc3)c4cccnc4		0	0.5	1	0.710526	0.652778	0.666667	0.396983
MMV689437	KINETOPLASTIDS	CC(N(C)c1ncc2c(N)nc(N)nc2n1)c3cc(Cl)cc(Cl)c3		0	0	0	0	0	0	0.439536
MMV689709	KINETOPLASTIDS	O=C(N1CC(C2=CC(NC)=CC(C)=N2)OCC1)C3=NNC4=C3C=CC=C4		0	0	0	0.0249307	0	0	0
MMV690027	KINETOPLASTIDS	COC1=C(OCCCCOC2=CC=C(C3=NNN=N3)C=C2)C=C(C([C@@H]4[C@H]5CC=CC4)=NN(C6CCCCCC6)C5=O)C=C1		0.5	0	0	0.247368	0.459459	0.555556	0.543424
MMV690028	KINETOPLASTIDS	COC1=C(OCCCCOC2=CC=C(C3=NNN=N3)C=C2)C=C(C4=NN(C5CCCCCC5)C(C4(C)C)=O)C=C1		0.25	0	0	0.0526316	0	0	0.799396
MMV690102	KINETOPLASTIDS	COc1ccc(Oc2ccc(cc2)[C@@H](C)N(C)c3ncc4c(N)nc(N)nc4n3)cc1		1	1	1	0.451524	0.375	0.333333	0.787966
MMV690103	KINETOPLASTIDS	C[C@@H](N(C)c1ncc2c(N)nc(N)nc2n1)c3ccc4CCCCc4c3		0	0	0	0.0736842	0.0972222	0.25	0.468794
MMV676492	LYMPHATIC FILARIASIS	Sc1nnc(NC(=O)c2cc(Br)ccc2Cl)s1		0	0	0	0	0	0	0
MMV687775	LYMPHATIC FILARIASIS	CC1(C)OB(O)c2ccc(cc12)C3=NOC(C3)(c4cc(Cl)c(F)c(Cl)c4)C(F)(F)F		0.5	0	0.25	1	1	1	0.520856
MMV687776	LYMPHATIC FILARIASIS	Cc1cc(ccc1C(=O)NCc2ccc3B(O)OC(C)(C)c3c2)C4=NOC(C4)(c5cc(Cl)c(F)c(Cl)c5)C(F)(F)F		0	0	0	0.0736842	0	0	0.616662
MMV000858	MALARIA	Clc1ccc(cc1)S(=O)(=O)N2CCN(CC2)C(=S)NCc3occc3		0.25	0	0	0	0	0	0.133026
MMV000907	MALARIA	COc1cccc2c(C)nc(N=C(N)N)nc12		0	0	0	0.0526316	0	0	0
MMV001059	MALARIA	CCCS(=O)(=O)N1CCC(CO)(Cc2ccccc2C(F)(F)F)CC1		0.5	1	1	0.123755	0.0972222	0.666667	0
MMV006239	MALARIA	Brc1ccc2NC(=O)C3(NCCc4c3[nH]c5ccccc45)c2c1		0	0	0	0	0	0	0
MMV006372	MALARIA	CN(C)CCNc1ncnc2c3cc(C)ccc3[nH]c12		0.25	0	0.25	0.131579	0.0277778	0.111111	0.157596
MMV006741	MALARIA	COc1cc2ncnc(NC3CCN(Cc4ccccc4)CC3)c2cc1OC		0	0	0	0	0	0	0.0274482
MMV006833	MALARIA	Cc1cc(Cl)c(cc1OCC(=O)NC2CCCCC2)S(=O)(=O)N3CCCC3		0	0	0	0	0	0	0
MMV006901	MALARIA	CN(C)c1cc(NC(=O)Nc2ccccc2)c3ccccc3n1		0.25	0	0	0.0526316	0.1875	0.272727	0.959767
MMV007133	MALARIA	CC(C)N(Cc1ccccc1)S(=O)(=O)c2ccc(cc2)C(=O)Nc3cc(C)on3		0.25	0	0	0	0.305556	0	0
MMV007471	MALARIA	COc1cc(OC)cc(c1)C(=O)NCC2Cc3cc(Cl)cc(c3O2)c4ccncc4		0	0	0	0	0	0	0
MMV007625	MALARIA	Cc1cc(C)n(n1)c2ccc(NC(=O)C3CCN(Cc4cnc(C)s4)CC3)cc2		0	0	0	0	0	0	0
MMV007638	MALARIA	CCOc1ccc(cc1)c2nc(NC(=O)CS(=O)(=O)c3ccccc3)sc2C		0	0	0.25	0	0	0	0.256932
MMV007803	MALARIA	Clc1ccccc1CSCc2oc(cc2)C(=O)NC3CC3		0.25	0	0.25	0.311522	0.305556	0.416667	0
MMV007920	MALARIA	Nc1ccc(cc1)C(=O)Nc2ccc(cc2)c3oc4ccccc4n3		0	0	0	0	0	0	0.235302
MMV008439	MALARIA	COc1ccc(CN2CCOc3ccc(cc3C2)C(C)(O)CN(C)C)cc1C		0	0	0.25	0	0	0	0
MMV009054	MALARIA	Cc1onc(c1)C(=O)Nc2cnn(Cc3ccc(Cl)cc3Cl)c2		0	0	0	0.0526316	0	0	0
MMV009135	MALARIA	O=C(C1CCN(CC1)c2nnnn2c3ccccc3)N4CCc5ccccc5C4		0	0	0	0	0	0	0
MMV010545	MALARIA	COc1ccc(cn1)c2cnc3ccc(NCc4ccc(cc4)S(=O)(=O)N)nn23		0	0	0	0.0157895	0.0277778	0.0833333	0
MMV010576	MALARIA	COc1cc(ccc1O)c2cc(cnc2N)c3ccc(cc3)S(=O)(=O)C		0.5	0.25	0.25	0	0	0	0
MMV010764	MALARIA	C(Nc1nn2c(cnc2s1)c3cccs3)C4CCOCC4		0	0	0	0.0526316	0.4375	0.127273	0
MMV011229	MALARIA	CC1=NC2=NC=CN2C(NC3=CC=C(C(F)(F)F)C=C3)=C1		0	0	0	0	0	0	0.164901
MMV011511	MALARIA	COc1ccc(CCN2CCC(CC2)NCc3cccc(c3)N(C)C)cc1		0	0	0	0	0	0	0
MMV011691	MALARIA	NCC(=O)N1CCn2c(C1)nc(c2Nc3ccc4OCOc4c3)c5ccccc5		0	0	0.5	0.186344	0.305556	0.583333	0
MMV011765	MALARIA	FC(F)(F)c1cnc(Sc2oc(nn2)c3ccncc3)c(Cl)c1		0	0.25	0.5	0.374111	0.722222	0.916667	0.143949
MMV011903	MALARIA	Cc1ccc(NC(=O)c2nc[nH]c2C(=O)Nc3nc4ccccc4[nH]3)c(C)c1		0.75	1	1	0.157895	0.25	0.037037	0.359592
MMV016136	MALARIA	Cc1cc(Nc2ccncc2)n3nc(C)c(c4ccccc4Cl)c3n1		0	0	0	0	0	0	0.228105
MMV016838	MALARIA	Cc1ccc(cc1)-c1cc(c2cc(ccc2n1)Br)C(=O)Nc1cccnc1		0.5	0.25	0	0.421053	0.583333	1	0
MMV019087	MALARIA	Cc1cc(C)n2nc(nc2n1)C(=O)Nc3cc(ccc3N4CCOCC4)C(F)(F)F		0	0	0	0	0	0	0.149974
MMV019189	MALARIA	Cc1ccc2c(NC(=O)C23NN=C(S3)c4ccccc4)c1C		0.5	0	0	0	0	0	0
MMV019234	MALARIA	COc1ccc(cc1OC)C2CC(=NN2C(=O)c3occc3)c4cccs4		0	0	0	0	0	0	0.221308
MMV019551	MALARIA	CCC(NC(=O)c1ccccc1NC(=O)c2ccc(C)cc2)C(=O)OC		0	0.25	0.25	0.0736842	0	0	0.0614091
MMV019721	MALARIA	CCN(CC)S(=O)(=O)c1ccc(Cl)c(c1)C(=O)Nc2ccc3nc(C)sc3c2		0.25	0	0	0	0	0	0.0145909
MMV019742	MALARIA	Cc1ccc(cc1)S(=O)(=O)N2CCN(CC2)C(=O)c3cc([nH]n3)c4ccccc4		0.5	0.5	0.25	0.368421	0.6875	0.781818	0.0637127
MMV019790	MALARIA	CCOc1ccccc1C(=O)Nc2cccc(c2)c3nc4ncccn4c3C		0	0	0	0	0.236111	0.5	0
MMV019807	MALARIA	Cc1ccc2cc(C3NC(=O)c4ccccc4N3)c(Cl)nc2c1		0	0	0.25	0	0	0	0
MMV019838	MALARIA	FC(F)(F)c1cc(cc(c1)C(F)(F)F)C(=O)Nc2ccnc(n2)c3cccnc3		0	0	0	0	0	0	0
MMV019993	MALARIA	CC(Nc1nncc(n1)c2ccc(cc2)C(F)(F)F)c3cn(C)nc3C		0	0	0	0	0	0	0.11132
MMV020081	MALARIA	COc1cccc(CC(=O)N2CCC(CC2)n3c(C)nc4ccc(F)cc34)c1		0.25	0.25	0.25	0	0.256757	0.191919	0
MMV020120	MALARIA	CC1CC1C(=O)NC2CCN(CC3(CCCCC3)c4ccccc4)CC2		0.25	0	0	0	0	0	0.0658007
MMV020136	MALARIA	CNC(=O)c1cc(cs1)S(=O)(=O)N2CCN(CC2)c3ccccn3		0	0	0	0	0	0	0.149183
MMV020152	MALARIA	Cc1onc(c1)C(=O)Nc2ccc(cc2)c3ccccc3		0	0	0	0	0	0	0
MMV020165	MALARIA	CC(C)NCC(=O)Nc1cccc(c1)C(=O)Nc2cccc(c2)C(F)(F)F		0	0	0	0.0736842	0	0.166667	0.0258465
MMV020289	MALARIA	Cc1ccc(NC(=O)c2cc(ccc2C)S(=O)(=O)NC(C)(C)C)nc1		0	0	0	0.0736842	0.0277778	0.166667	0
MMV020291	MALARIA	CC(N1CCN(CC1)S(=O)(=O)c2ccc(cc2)C(C)(C)C)C(=O)N3CCCC3		0.25	0	0	0	0	0	0
MMV020320	MALARIA	Cc1oc(NC(=O)c2cn(nc2c3ccccc3C)c4ccccc4)nn1		0.25	0.25	0.25	0	0	0	0.30331
MMV020321	MALARIA	COc1ccccc1C(C)NCC(=O)Nc2cc(ccc2Cl)C(F)(F)F		0	0	0	0.0157895	0	0.037037	0.202466
MMV020388	MALARIA	CC(Nc1cc(Cl)ccc1N2CCOCC2)C(=O)N3CCCC(C)C3		0	0	0	0.0157895	0.0277778	0.166667	0
MMV020391	MALARIA	CC(C)C(C(=O)Nc1ccc(cc1)S(=O)(=O)N(C)C)c2ccc(Cl)cc2		0.5	1	1	0.947368	0.8125	1	0.558002
MMV020512	MALARIA	Cc1ccc(Oc2ccc(NC(=O)CNc3ccccc3N4CCCC4=O)cc2)cc1		0.5	0.5	0	0.0736842	0.166667	0.407407	0.115525
MMV020517	MALARIA	COc1ccccc1CNC(=O)c2cc(nc3c2cnn3C(C)C)C4CC4		0	0	0	0.0736842	0.324324	0.555556	0.475324
MMV020520	MALARIA	Cc1cc2ccccc2n1CC(=O)N3CC(Oc4ccccc34)C(=O)N5CCCCC5		0	0.25	0	0	0	0	0.167123
MMV020537	MALARIA	Clc1ccc2OCCN(c3ccc(s3)C(=O)NC4CC4)c2c1		0	0	0	0.247368	0.324324	0.333333	0.0556698
MMV020591	MALARIA	CC(C)C(NC(=O)Cc1cccc2ccccc12)C(=O)Nc3cccc(c3)C#N		0	0	0	0.0157895	0.0277778	0.111111	0.192522
MMV020623	MALARIA	Cc1onc(C)c1C(=O)N2CCCC(C2)c3[nH]c4c(C)cccc4c3c5ccncc5		1	1	1	0.247368	0.375	0.703704	0.203953
MMV020670	MALARIA	COc1ccc(cc1)c2cncc3ccc(nc23)C(=O)NCCCn4ccnc4		0.25	0	0	0	0	0	0
MMV020710	MALARIA	COc1ccc(Cl)cc1NC(=O)CN(C)C(=O)c2cnn(n2)c3ccccc3		0	0	0	0.0736842	0.189189	0.185185	0.103014
MMV020982	MALARIA	CC(C)(C)c1cc(cc(c1)C(=O)Nc2cccnc2)C(=O)Nc3cccnc3		0	0	0	0	0	0	0.0893823
MMV021057	MALARIA	CO\C=C(\C(=O)OC)/c1ccccc1Oc2cc(Oc3ccccc3C#N)ncn2	Azoxystrobin	0	0	0	0	0	0	0.0928014
MMV021375	MALARIA	CC(C)CNc1cc(nc2c([nH]nc12)-c1ccccc1)C		0	0	0	0	0	0	0
MMV022029	MALARIA	CN1CCC(CC1)NCc2cccc(c2)c3ccc(cc3)S(=O)(=O)NCc4ccccc4		0	0.5	1	0.536842	0.72973	0.919192	0.653341
MMV022236	MALARIA	CCN(CC)CCCN1CCN(CC1)C(=O)c2cccc(c2)c3noc(n3)C(F)(F)F		0	0	0.25	0.0736842	0	0	0
MMV022478	MALARIA	Clc1cccc(c1)c2cnn3ccc(nc23)C(=O)Nc4ccc(cc4)N5CCNCC5		0.5	1	1	0.687055	0.722222	0.916667	0.760409
MMV023183	MALARIA	C(C1CC1)N2Cc3ccccc3OC4(CCN(Cc5c[nH]c6cnccc56)CC4)C2		0	0	0	0	0	0	0.292818
MMV023227	MALARIA	Cc1nc([nH]c1C)c2cccc(NCc3ccccc3)c2		0	0	0	0	0	0	0
MMV023233	MALARIA	Nc1nccc2ccc(cc12)c3ccc4nccn4c3		1	1	1	0.499289	0.722222	0.666667	0.450193
MMV023370	MALARIA	Nc1ncc(cc1c2nc3cc(Cl)cnc3[nH]2)c4cn[nH]c4		0	0	0	0	0	0	0
MMV023388	MALARIA	FC(F)(F)c1cccc(c1)C(=O)NC2CCN(C2)c3ccnc4ccccc34		0	0	0	0	0.444444	0.916667	0
MMV023860	MALARIA	NS(=O)(=O)c1cccc(c1)c2ccc3ncc(nc3c2)N4CCOCC4		0	0	0	0.0157895	0	0.272727	0
MMV023949	MALARIA	CC(C)(C)c1cc(C(=O)N2CCN(CC2)c3nccnc3C#N)n(Cc4ccccc4)n1		0	0	0.25	0	0	0	0
MMV023953	MALARIA	O=C(Nc1cccc(c1)c2ccc(NCCCN3CCCC3)nc2)c4ccccc4		0.25	0.5	1	0.0736842	0.324324	0.353535	0.201689
MMV023985	MALARIA	COc1ccc(cc1OC)c2cnc3ccc(nn23)N4CCCC4		0.5	1	1	0.749644	0.930556	1	0.269617
MMV024035	MALARIA	O=C(Nc1ccccc1)c2ccc(s2)c3cc4ccncc4cc3OC5CCNCC5		0	0	0	0.0157895	0.324324	0.272727	1
MMV024101	MALARIA	NS(=O)(=O)c1cncc(c1)c2ccc3nccc(c4cn[nH]c4)c3n2		0	0	0	0	0	0.0833333	0
MMV024114	MALARIA	Cc1ccc(cc1)S(=O)(=O)n2cc(c3ccnc(N)c3)c4cc(Br)cnc24		0.5	0.75	0.75	0.363158	0.459459	0.353535	0.789724
MMV024195	MALARIA	CN(C)CCNC(=O)N1CCCN(CC1)c2ncnc3cc(sc23)c4ccccc4		0	0	0	0	0	0.407407	0
MMV024397	MALARIA	O=C(NC1CC1)c2ccc(nc2)N3CCC(Cc4ccccc4)CC3		0	0	0	0	0	0	0
MMV024406	MALARIA	Clc1cccc(NC(=O)c2cnc(N3CCN(CC3)c4ccncc4)c(Cl)c2)c1		0.5	1	1	0.768421	0.932432	1	0.797908
MMV024443	MALARIA	CN(C(=O)c1cc2c(cccc2[nH]1)c3cncnc3)c4ccccc4		0	0	0	0.0611664	0.0972222	0.166667	0
MMV024829	MALARIA	CC(C)CN1CCC(CC1)N(C)c2cc(NC(=O)c3cccc(C)c3)ccn2		0	0	0	0	0.0540541	0	0
MMV024937	MALARIA	FC(F)(F)c1nc(oc1C(=O)Nc2ccc(nc2)N3CCNCC3)c4ccccc4		0	0	0	0	0.236111	0.5	0.183995
MMV026020	MALARIA	CS(=O)(=O)c1cccc(c1)c2cnc3[nH]cc(c4ccc(CCC(=O)O)cc4)c3c2		0	0	0	0.105263	0.5	0.272727	0.0235532
MMV026313	MALARIA	Nc1nccc2ccc(Oc3ccncc3)cc12		0	0	0	0	0.0277778	0.166667	0
MMV026356	MALARIA	CCn1ncc2c(NC3CCOCC3)c(CNC(=O)c4ccnn4C)c(C)nc12		0	0	0	0	0	0	0
MMV026468	MALARIA	OCc1ccc(cc1)c2cncc(Nc3cccc(Cl)c3)c2		0	0	0	0	0	0	0
MMV026490	MALARIA	O=C(NCCc1ccccc1)c2cc(cnc2NCC3CC3)c4cccnc4		0	0.5	0	0.0736842	0.391892	0.434343	0.0329353
MMV026550	MALARIA	CC(C)(C)CN1C(=NC(C1=O)(c2ccccc2)c3ccccc3)N		0	0	0	0	0	0.030303	0.00762875
MMV028694	MALARIA	OCCc1ccc(Nc2nccc(n2)c3nnc4ccccn34)cc1		0	0.25	1	0.0736842	0.444444	0.416667	0
MMV030734	MALARIA	CC(C)(CN)c1nc(c2ccc(Cl)c(O)c2)c([nH]1)c3ccnc(N)n3		0	0	0	0.0157895	0	0.0833333	0
MMV031011	MALARIA	CNC(=O)C1Cc2c([nH]c3cc(Cl)ccc23)C4(CCN(CCc5ccccc5)CC4)N1		0	0	0	0	0.391892	0.191919	0.707007
MMV032967	MALARIA	FC(F)(F)c1cccc(c1)c2nc3c(NCc4ccncc4)nccc3[nH]2		0	0	0	0.0157895	0	0	0
MMV032995	MALARIA	FC(F)(F)c1ccc(CN2C(=O)COCc3ccc(Br)cc23)cc1		0	0	0	0.186344	0.236111	0.25	0
MMV062221	MALARIA	Cc1cc(C)nc(n1)n2nc(C)cc2Nc3ccccc3		0.5	0.25	1	0	0.0972222	0	0.315316
MMV084603	MALARIA	O=C1N(Cc2cc3ccccc3s2)CC4CN(Cc5ccccc5)CCN14		0	0	0	0.0526316	0.125	0	0.0213166
MMV084864	MALARIA	O=C(Nc1cnc2ccccc2c1)c3cccc(c3)n4cnnn4		0	0	0	0	0	0	0.0351812
MMV085071	MALARIA	COc1cncc(c1)c2cncc(n2)N3CCN(CC3)c4ccncc4		0.25	0	0	0.248933	0.236111	0.583333	0
MMV085210	MALARIA	Clc1ccc(cc1)S(=O)(=O)NC(Cc2c[nH]c3ccccc23)C(=O)N4CCCCC4		0	0	0	0	0	0	0
MMV085230	MALARIA	CCCNC(=O)N1CCC2(CC1)CC(=O)c3cc(C)ccc3O2		0	0	0	0	0	0	0
MMV085499	MALARIA	NC(=O)c1ccc(cc1)c2nc(cnc2N)c3ccc(cc3)C#N		0.5	0.5	1	0	0.166667	0.333333	0
MMV1019989	MALARIA	CCc1ccc(cc1)C(NCc2nc(N)nc(n2)N(C)C)C(C)C		0	0	0	0	0	0	0
MMV1028806	MALARIA	Fc1ccccc1C2CC2C(=O)Nc3nc(cs3)c4ccccn4		0	0	0	0.0526316	0.125	0	0.165092
MMV1029203	MALARIA	CNC(=O)CNc1nc(nc2scc(c3ccccc3)c12)c4ccccn4		0	0	0	0	0	0	0
MMV1030799	MALARIA	CCCn1c(NC(=O)c2ccc3ccccc3n2)nc4ccccc14		0.25	0	0	0.0736842	0.0972222	0.0833333	0.779215
MMV1037162	MALARIA	CCNC(=O)C(C)Nc1nc(nc2sc(C)c(C)c12)c3cccnc3		0	0	0	0	0	0	0.0700684
MMV1088520	MALARIA	CC(C)N(Cc1ccccn1)Cc2csc(n2)c3oc(C)cc3		0	0.25	0	0	0.0277778	0.185185	0.0470325
MMV392832	MALARIA	COc1cccc(c1)c2cc3c(Nc4cccnc4)nccc3[nH]2		0	0	0	0	0	0	0
MMV393144	MALARIA	CN1CCN(CC1)c2nccc3[nH]c(cc23)c4cccc(F)c4		0	0.5	1	0	0	0	0.215223
MMV407834	MALARIA	CCOc1ccccc1NC(C)C(=O)Nc2cc(ccc2N3CCOCC3)C(F)(F)F		0	0	0	0.0157895	0	0.0833333	0
MMV560185	MALARIA	C1CCN(CC1)c2cc(nc3ccccc23)c4ccccn4		0.25	0	0.25	0.0157895	0.0540541	0.185185	0.275172
MMV634140	MALARIA	Clc1ccc2nc(cc(c2c1)C(=O)NCCN1CCCC1)NCCN1CCOCC1		0	0	0	0.0157895	0.0277778	0.25	0
MMV663250	MALARIA	Clc1cccc(c1)C(c2ccc(CN3CCNCC3)cc2)n4ccnc4		0.25	0.25	1	0.311522	0.583333	0.833333	0.124137
MMV667494	MALARIA	FC1(F)CCN(CCCCNc2cc(c3cc(ccc3n2)Cl)C(=O)NCCN2CCCC2)CC1		0.5	1	1	0.189474	0.236111	0.416667	0.0233766
MMV676260	MALARIA	CN1CCN(CC1)c2nccc3nc([nH]c23)c4ccc(F)c(F)c4		0	0	0	0	0	0	0
MMV676269	MALARIA	C[C@@H](N1CCCC[C@H]1c2ccc(OCc3cccc(F)c3)cc2)C(=O)N		0	0	0	0	0	0	0
MMV676270	MALARIA	C[C@@H](N1CCCC[C@@H]1c2ccc(OCc3cccc(F)c3)cc2)C(=O)N		0	0	0	0.0736842	0.305556	0.333333	0.0126538
MMV676350	MALARIA	Cc1cnc(CCNC(=O)c2cc(cs2)c3ccc(Cl)cc3)[nH]1		0.25	0.25	0	0	0.3125	0.345455	0.0909162
MMV676358	MALARIA	Nc1ncc(Br)cc1c2nc3cc(Cl)cnc3[nH]2		0	0	0	0	0	0	0
MMV676380	MALARIA	CC(=O)Nc1ccc(NC(=O)c2cc([nH]n2)c3cc(Cl)ccc3O)cc1		0	0	0	0.105263	0	0	0
MMV676442	MALARIA	CC(C)c1ncc(c2ccncc2)c(n1)[C@@H]3CC[C@@H](CNC(=O)c4cccnc4)CC3		0	0	0	0	0	0	0
MMV676528	MALARIA	CN(c1ccc(F)cc1)S(=O)(=O)c2ccc(Cl)c(c2)C(=O)Nc3cccc(C)n3		0	0	0	0	0	0	0.0790009
MMV676605	MALARIA	C[C@@]1(O)C[C@@H](C1)c2nc(c3ccc4ccc(nc4c3)c5ccccc5)c6c(N)nccn26		0	0	0	0	0	0	0.236895
MMV676877	MALARIA	OCCNc1ccc(cc1)C(=O)C2C[C@H]2c3ccc(Cl)cc3		0	0	0	0	0.0972222	0.5	0
MMV676881	MALARIA	CCn1cnc2c(Nc3cc(F)cc(F)c3)nc(nc12)C#N		1	1	1	0.248933	0.861111	0.666667	0
MMV687246	MALARIA	CN1CCN(CC1)S(=O)(=O)c2ccc(cc2)c3ccc4c(Nc5ccc6nn[nH]c6c5)ccnc4c3		0	0	0	0	0	0	0
MMV687794	MALARIA	CC1(C)Cc2c(CO1)c(nc3snc(Br)c23)N4CCOCC4		0	0	0	0	0	0	0.166909
MMV688980	MALARIA	CCC1=CC(=O)N(C)C(=N1)SC(C)C(=O)Nc2ccc(F)cc2		0	0	0.25	0	0	0	0
MMV001493	ONCHOCERCIASIS	COC(=O)C1=C(C)NC(=C(C1c2cccc3nonc23)C(=O)OC(C)C)C	Isradipine	0.5	0	0	0.0157895	0	0	0.24418
MMV002817	ONCHOCERCIASIS	Oc1c(I)cc(I)c2cccnc12	Iodoquinol	0.5	0.25	0.5	0	0	0.111111	0.770785
MMV668727	ONCHOCERCIASIS	Nc1ncc(cc1c2ccc(nc2)C(F)(F)F)c3ccc(nc3)C(F)(F)F		0	0	0	0.0526316	0	0	0.0949275
MMV671636	ONCHOCERCIASIS	CC1=C(C(=O)c2c(F)cc(F)cc2N1)c3ccc(Oc4ccc(OC(F)(F)F)cc4)cc3		0.5	1	1	0.363158	0.722222	0.666667	0.138289
MMV675969	ONCHOCERCIASIS	CC(C)(C)c1ccc(N[C@@H]2CCCC[C@H]2NC(=O)c3occc3)cc1		0	0	0	0	0	0	0
MMV675995	ONCHOCERCIASIS	COc1ccc(cc1)N(CCc2cccc(C)n2)C(=O)C		0.25	0.25	0	0.0157895	0	0	0
MMV675996	ONCHOCERCIASIS	COc1ccc(cc1)N(CCc2cccc(C)n2)C(=O)C3CCCCC3		0	0.5	0.25	0.0157895	0	0	0.00729038
MMV676063	ONCHOCERCIASIS	CCCCc1ccc(NC(=O)Nc2ccc(O[C@H]3CCCC[C@@H]3N(C)c4ccccc4)c(F)c2)cc1		0	0	0	0	0.140625	0.833333	0.51866
MMV676064	ONCHOCERCIASIS	CC(=O)N(CCN(C(=O)c1ccc(F)cc1)c2ccccc2)c3ccccc3		0.25	0	0	0	0	0	0
MMV676204	ONCHOCERCIASIS	Fc1ccc(cc1)C(=O)N(CCNc2ccccc2)c3ccccc3		0.25	0	0.25	0	0	0	0
MMV676480	ONCHOCERCIASIS	COC(=O)c1c2CCN(Cc3ccccc3)Cc2sc1NC(=O)C4=Cc5ccccc5OC4=O		0	0.75	0.5	0.305263	0.0277778	0.407407	0.122439
MMV000011	REFERENCE	C[C@@H]1[C@H]2[C@H](O)[C@H]3[C@H](N(C)C)C(=C(C(=O)N)C(=O)[C@@]3(O)C(=C2C(=O)c4c(O)cccc14)O)O	Doxycycline	0	0	0	0.0736842	0.121622	0	0
MMV000014	REFERENCE	O[C@H]([C@H]1CCCCN1)c2cc(nc3c(cccc23)C(F)(F)F)C(F)(F)F	Mefloquine	1	1	1	0.947368	1	1	0.833298
MMV000023	REFERENCE	COc1cc(NC(C)CCCN)c2ncccc2c1	Primaquine	0	0	0	0	0	0.111111	0.11208
MMV000062	REFERENCE	NC(=N)c1ccc(OCCCCCOc2ccc(cc2)C(=N)N)cc1	Pentamidine	0	0	0	0	0	0	0.0705605
MMV000063	REFERENCE	CCN(CC)CCCCCCNc1cc(OC)cc2c(C)ccnc12	Sitamaquine	0	0	0	0	0	0	0.28059
MMV001499	REFERENCE	CC1CS(=O)(=O)CCN1\N=C\c2oc(cc2)[N+](=O)[O-]	Nifurtimox	0	0	0	0.189474	0.0972222	0.5	0
MMV001625	REFERENCE	NCCCC(N)(C(F)F)C(=O)O	alpha-Difluoromethylornithine	0	0	0	0.0157895	0	0	0.0221444
MMV002529	REFERENCE	O=C(C1CCCCC1)N2CC3N(CCc4ccccc34)C(=O)C2	Praziquantel	1	1	1	0.189474	0.189189	0.407407	0
MMV002816	REFERENCE	CCN(CC)C(=O)N1CCN(C)CC1	Diethylcarbamazine	0	0	0	0.0157895	0.0277778	0.166667	0
MMV003152	REFERENCE	COC(=O)Nc1nc2cc(ccc2[nH]1)C(=O)c3ccccc3	Mebendazole	0	0	0	0.0157895	0	0.037037	0.17059
MMV637953	REFERENCE	Cc1ccc(cc1NC(=O)c2cccc(NC(=O)Nc3cccc(c3)C(=O)Nc4cc(ccc4C)C(=O)Nc5ccc(c6cc(cc(c56)S(=O)(=O)O)S(=O)(=O)O)S(=O)(=O)O)c2)C(=O)Nc7ccc(c8cc(cc(c78)S(=O)(=O)O)S(=O)(=O)O)S(=O)(=O)O	Suramin	0	0	0	0.0157895	0.121622	0.185185	0
MMV687796	REFERENCE	NCCC(O)C(=O)N[C@@H]1C[C@H](N)[C@@H](OC2O[C@H](CN)[C@@H](O)[C@H](O)[C@H]2O)[C@H](O)C1OC3O[C@H](CO)[C@@H](O)[C@H](N)[C@H]3O	Amikacin	0	0	0	0	0	0	0
MMV687798	REFERENCE	C[C@H]1COc2c(N3CCN(C)CC3)c(F)cc4C(=O)C(=CN1c24)C(=O)O	Levofloxacin (-)-ofloxacin	0	0	0	0	0	0	0.200479
MMV687800	REFERENCE	CC(C)N=C1C=C2N(c3ccc(Cl)cc3)c4ccccc4N=C2C=C1Nc5ccc(Cl)cc5	Clofazimine	1	1	1	1	1	1	0.677717
MMV687801	REFERENCE	CC[C@H](CO)NCCN[C@H](CC)CO	Ethambutol	0	0	0	0.0157895	0	0.037037	0.103458
MMV687803	REFERENCE	CC(=O)NC[C@@H]1CN(C(=O)O1)c2ccc(N3CCOCC3)c(F)c2	Linezolid	0	0	0	0.105263	0	0	0
MMV688773	REFERENCE	[O-][N+](=O)c1nccn1CC(=O)NCc2ccccc2	Benznidazole	0	0	0	0.0157895	0.0540541	0	0.00201469
MMV688774	REFERENCE	CC[C@@H]([C@H](C)O)N1N=CN(C1=O)c2ccc(cc2)N3CCN(CC3)c4ccc(OC[C@@H]5CO[C@](Cn6cncn6)(C5)c7ccc(F)cc7F)cc4	Posaconazole	0.75	1	1	0.0736842	0.0540541	0.407407	0.00582846
MMV688775	REFERENCE	CO[C@H]1\C=C\O[C@@]2(C)OC3=C(C2=O)C4=C(O)\C(=C/NN5CCN(C)CC5)\C(=N\C(=O)\C(=C/C=C\[C@H](C)[C@H](O)[C@@H](C)[C@@H](O)[C@@H](C)[C@H](OC(=O)C)[C@@H]1C)\C)\C(=C4C(=C3C)O)O	Rifampicin	0	0	0	0	0	0	0
MMV688978	REFERENCE	CCP(=[Au]S[C@H]1O[C@@H](COC(=O)C)[C@H](OC(=O)C)[C@@H](OC(=O)C)[C@@H]1OC(=O)C)(CC)CC	Auranofin	1	1	1	1	1	1	0
MMV688990	REFERENCE	CCCCCCCCCCCCCCCCOP(=O)([O-])OCC[N+](C)(C)C	Miltefosine	0	0	0	0	0.0540541	0.030303	0
MMV688991	REFERENCE	CC(=O)Oc1ccccc1C(=O)Nc2ncc(s2)[N+](=O)[O-]	Nitazoxanide	0.5	1	1	0.0736842	0.121622	0.407407	0
MMV688994	REFERENCE	CNC1C(O)C(O)C(CO)OC1OC2C(OC3C(O)C(O)C(NC(=N)N)C(O)C3NC(=N)N)OC(C)C2(O)C=O	Streptomycin	0	0	0	0.0526316	0	0	0
MMV689480	REFERENCE	O=C1C(CC2CCC(C(C)(C)C)CC2)=C(C(C3=C1C=CC=C3)=O)O	Buparvaquone	0.75	0.5	0.5	0.0736842	0	0.037037	0.164948
MMV689758	REFERENCE	COc1nc2ccc(Br)cc2cc1[C@@H](c3ccccc3)[C@@](O)(CCN(C)C)c4cccc5ccccc45	Bedaquiline	0.5	1	1	0.210526	0.75	0.927273	0.764795
MMV689000	REFERENCE	C[C@@H]1OC(=O)C[C@H](O)C[C@H](O)CC[C@@H](O)[C@H](O)C[C@H](O)C[C@]2(O)C[C@H](O)[C@H]([C@H](C[C@@H](O[C@@H]3O[C@H](C)[C@@H](O)[C@H](N)[C@@H]3O)\C=C\C=C\C=C\C=C\C=C\C=C\C=C\[C@H](C)[C@@H](O)[C@H]1C)O2)C(=O)O	Amphotericin B	0	0	0	0	0	0	0
MMV1198433	SCHISTOSOMIASIS	CC(C)c1ccc(NC(=O)COC2=CC(=C(C#N)C(=O)N2C)C)cc1		0	0	0	0	0	0	0.0663979
MMV676382	SCHISTOSOMIASIS	Cn1ncc2c(nc(NCCc3c[nH]c4ccccc34)nc12)N1CCOCC1		1	1	1	0.363158	0.594595	0.925926	0.163762
MMV676536	SCHISTOSOMIASIS	COCC(C)NC(=O)CSc1ncnc2sc(cc12)-c1ccccc1		0	0	0	0	0	0	0
MMV688178	SCHISTOSOMIASIS	O(c1ccccc1)c1ccc(cc1)-c1cncc(n1)-c1ccc2[nH]ccc2c1		0	0	0.5	0.536842	1	1	0.80351
MMV688270	SCHISTOSOMIASIS	COc1ccc(cc1)-c1cnc2cnc(cn12)-c1cccc(OC(C)C)c1		0.5	1	1	0	0	0	0.468835
MMV688313	SCHISTOSOMIASIS	COc1ccc(cc1OC)-c1nnc2ccc(cn12)-c1cccc(c1)C(C)C		0	0.5	0	0	0	0.037037	0.695738
MMV688552	SCHISTOSOMIASIS	CC(C(SC1=NC=CC=N1)=C2C)=NN2C(NC3=CC=CC(C(F)(F)F)=C3)=O		0	0	0	0.0157895	0	0.0833333	0
MMV688761	SCHISTOSOMIASIS	CS(=O)(=O)c1ccc(cc1[N+](=O)[O-])C(=O)N(CC2CCCO2)c3nc4ccccc4s3		1	1	1	1	1	1	0.906011
MMV688762	SCHISTOSOMIASIS	C1CCN(C1)C(c2ccccn2)c3c([nH]c4ccccc34)c5ccccc5		1	1	1	1	1	1	0.863586
MMV688763	SCHISTOSOMIASIS	CNc1nnc(SC2=C(Cl)C(=O)N(N=C2)c3ccccc3)s1		1	1	1	1	1	1	0.886217
MMV688766	SCHISTOSOMIASIS	COc1ccc(c(O)c1)c2onc(c2c3ccc(Cl)cc3)C(F)(F)F		0	0	0	0.0157895	0	0	0.831184
MMV688768	SCHISTOSOMIASIS	CN1CCN(CC1)C(c2cccs2)c3c(C)[nH]c4ccccc34		0.75	1	1	1	1	1	0.772168
MMV688771	SCHISTOSOMIASIS	Cc1ccccc1C(=O)N2N=C(Nc3ccccc3)SC2(C)C		0.25	0.5	0	0	0	0	0.0069606
MMV688330	TOXOPLASMOSIS	CC(=O)N1CCN(CC1)c1ccc(Oc2ccc(Cl)cc2O)cc1		0	0	0	0	0	0	0
MMV688345	TOXOPLASMOSIS	Nc1nc(N)c2c3CCN(Cc4ccccc4)Cc3sc2n1		0	0	0	0.0157895	0.0972222	0.25	0
MMV688364	TOXOPLASMOSIS	CC(C)(C)OC(=O)N1CCC(Cn2nc(-c3cnc4ccccc4c3)c3c(N)ncnc23)CC1		0.25	1	1	0.311522	0.305556	0.583333	0.0437551
MMV688411	TOXOPLASMOSIS	Nc1ncnc2n(CC3CCNCC3)nc(-c3cnc4ccccc4c3)c12		0	0	0	0.0736842	0.0972222	0.333333	0
MMV688417	TOXOPLASMOSIS	CC(C)n1nc(-c2cc3c(Cl)cccc3[nH]2)c2c(N)ncnc12		1	1	1	0.478947	0.583333	1	0.327356
MMV688469	TOXOPLASMOSIS	Nc1ncnc2[nH]nc(Cc3cccc4ccccc34)c12		0.25	0.5	0.75	0.123755	0.166667	0.416667	0
MMV688470	TOXOPLASMOSIS	CS(=O)(=O)N1CCC(CCn2nc(Cc3cccc4ccccc34)c3c(N)ncnc23)CC1		0	0	0	0.157895	0.3125	0.345455	0
MMV688471	TOXOPLASMOSIS	CC(C(=O)Nc1ccc2oc(nc2c1)-c1ccncc1)c1ccccc1		0.25	0	0	0.0526316	0.1875	0.127273	0
MMV688472	TOXOPLASMOSIS	CC(Oc1cccc(Cl)c1)C(=O)Nc1ccc2oc(nc2c1)-c1ccncc1		0.25	0	0	0.210526	0.3125	0.418182	0
MMV688509	TOXOPLASMOSIS	Fc1ccc(cc1)-c1[nH]c(cc1-c1ccncc1)C1CCN(CC1)C(=O)OCc1ccccc1		0	0	0	0	0.0277778	0	0
MMV688548	TOXOPLASMOSIS	CC(C)(C)n1nc(-c2ccccc2)c2c(N)ncnc12		0.25	0	0	0.0526316	0	0	0
MMV688703	TOXOPLASMOSIS	CN1CCC(CC1)c1cc(c([nH]1)-c1ccc(F)cc1)-c1ccncc1		0	0	0	0	0	0	0
MMV688704	TOXOPLASMOSIS	Cc1cc2nc(NC(=O)C(C)(C)C)nc(Cl)c2n1Cc1ccc(Cl)cc1		0	0	0	0	0.25	0.127273	0
MMV688852	TOXOPLASMOSIS	CC(C)(C)n1nc(Cc2ccc(F)c(Cl)c2)c2c(N)ncnc12		0	0	0	0	0	0	0
MMV688955	TOXOPLASMOSIS	Cc1cc(NC(=O)c2ccc(Oc3ccc(Cl)cc3O)o2)no1		0	0	0	0	0	0	0
MMV637229	TRICHURIASIS	ClC1=CC=C([C@@](C)(C2=CC=CC=C2)OCCC3N(C)CCC3)C=C1	Clemastine	0.5	1	1	0.884211	1	1	0.398681
MMV012074	TUBERCULOSIS	Cc1nc2ccccn2c1C(=O)NCc3ccc(Cl)cc3		0	0	0	0	0	0.111111	0.0786781
MMV021013	TUBERCULOSIS	C1CCC(CC1)Nc2cc(nc(n2)c3ccccn3)C4CC4		0	0	0	0	0	0	0.679145
MMV021660	TUBERCULOSIS	Cc1cc(NCCc2ccccc2)nc(NC(=N)Nc3ccc(Cl)cc3)n1		1	1	1	1	1	1	0.752956
MMV023969	TUBERCULOSIS	C(Nc1cccnc1)c2ccc(s2)c3cc4ccncc4cc3OC5CCNCC5		0.75	0.75	1	0	0.3125	0.407407	0.694252
MMV024311	TUBERCULOSIS	Cc1ccc2[nH]c(C3CCCNC3)c(c4ccncc4)c2c1		0	0	0	0	0	0	0.132503
MMV047015	TUBERCULOSIS	COc1cc(nc2ccc(C)c(N)c12)C(F)(F)F		0	0	0	0	0	0	0.0944347
MMV053220	TUBERCULOSIS	NC(=O)COc1ccc(cc1)c2ccc(cc2)C#N		0	0.25	0	0.0526316	0	0	0.144425
MMV054312	TUBERCULOSIS	CC(=O)N1CCc2cc3nc(C)cc(C)c3cc12		0	0	0	0.0736842	0	0	0
MMV063404	TUBERCULOSIS	Cc1nn(Cc2ccccc2)c(Cl)c1C(=O)NC3CCCCCC3		0.5	0	0	0	0	0	0.0141971
MMV069458	TUBERCULOSIS	FC(F)(F)c1nnc2ccc(Cl)nn12		0.25	0	0	0.0736842	0	0.111111	0.0512056
MMV090930	TUBERCULOSIS	CCOC(=O)NC(=O)c1ccsc1NC(=O)c2nc3ccccc3s2		0	0	0	0	0	0	0
MMV102872	TUBERCULOSIS	FC(F)(F)c1cccc(c1)C(=O)Nc2oc(nn2)c3ccc(Cl)cc3		0	1	1	0	0.0625	0.927273	0.924859
MMV146306	TUBERCULOSIS	CCC(C)NC(=O)c1ccc(NC(=O)C2(CCCC2)c3ccccc3)cc1		0	0	0	0	0	0	0
MMV153413	TUBERCULOSIS	CCOC(=O)c1c(C)c(sc1NC(=O)c2c(F)c(F)c(F)c(F)c2F)C(=O)N		1	1	1	1	1	1	0.863797
MMV161996	TUBERCULOSIS	CC(C)CNS(=O)(=O)c1ccc(CCC(=O)Nc2ccc(Cl)cc2C)cc1		0	0	0	0.0736842	0.0972222	0.166667	0
MMV200748	TUBERCULOSIS	COc1ccc(cc1)C2(CCCC2)C(=O)Nc3ccc(Br)cc3		0	0	0.25	0.131579	0.236111	0.333333	0
MMV202458	TUBERCULOSIS	COc1ccc(OC(C)C(=O)Nc2ccc(Cl)cc2C)cc1		0	0	0	0.0526316	0.1875	0.127273	0
MMV228911	TUBERCULOSIS	COc1cccc(NC(=O)c2c3CCCc3sc2NC(=O)c4cccnc4)c1		0	0	0	0.131579	0.0277778	0.25	0
MMV272144	TUBERCULOSIS	COc1cccc(c1)n2nnnc2S(=O)(=O)C		1	1	1	1	1	1	0.834001
MMV393995	TUBERCULOSIS	Cc1cc(O)nc(n1)n2nc(C)cc2C		0	0	0	0.0157895	0.0540541	0.434343	0
MMV461553	TUBERCULOSIS	COC(=O)c1c2CCCCCc2sc1NC(=O)c3c(F)c(F)c(F)c(F)c3F		0.5	1	1	1	1	1	0.826288
MMV495543	TUBERCULOSIS	CC(C)(C)c1cnc(NC(=O)c2ccccc2O)s1		0	0.25	0.25	1	1	1	0.0892403
MMV553002	TUBERCULOSIS	CS(=O)(=O)CC1=Nc2ccccc2OC1=O		0	0	0	0.0526316	0.3125	0.272727	0
MMV611037	TUBERCULOSIS	CCC(Sc1oc2ccccc2n1)C(=O)Nc3nnc(C)s3		0	0	0	0	0	0.0833333	0.0616949
MMV661713	TUBERCULOSIS	Brc1cncc(c1)c2cc(NCCCn3ccnc3)nc(n2)c4ccccc4		0.25	1	1	0.157895	0.5625	0.563636	0.712225
MMV676377	TUBERCULOSIS	Brc1c(nc2ncccn12)c3ccc4OCOc4c3		0	0	0	0.0526316	0	0	0
MMV676379	TUBERCULOSIS	COc1cccc(OCC(=O)c2ccc(Br)cc2)c1		0	0	0	0.0526316	0	0	0
MMV676383	TUBERCULOSIS	CCC(Sc1oc2ccccc2n1)C(=O)Nc3nccs3		0.5	1	1	0.0526316	1	1	0.766365
MMV676384	TUBERCULOSIS	Fc1ccccc1c2oc(NCCc3ccccc3)c(n2)C#N		0	0	0	0.0736842	0	0	0
MMV676386	TUBERCULOSIS	Cc1cccc(Cn2ccc(NC(=O)c3ccc4OCOc4c3)n2)c1		0	0	0	0	0	0	0
MMV676388	TUBERCULOSIS	COc1cccc(c1)n2nnnc2S(=O)(=O)Cc3ccccc3		1	1	1	1	1	1	0.898514
MMV676389	TUBERCULOSIS	O=C(N1CCN(Cc2ccc3OCOc3c2)CC1)c4[nH]nc5CCCCc45		0	0	0	0	0.0625	0	0
MMV676395	TUBERCULOSIS	OC1=C(C(=O)Nc2cccnc2)C(=O)N3CCc4cccc1c34		0	0	0	0.0526316	0	0	0
MMV676401	TUBERCULOSIS	C(Nc1nc(nc2ccccc12)N3CCCCC3)c4occc4		0.75	0.5	1	1	1	1	0
MMV676406	TUBERCULOSIS	CC(C)n1ncc2c(cc(nc12)c3ccccc3)C(=O)NCC(N4CCOCC4)c5cccs5		0.5	0	0.25	0.157895	0.375	0.2	0.166543
MMV676409	TUBERCULOSIS	Fc1cccc(OCC(=O)Nc2nc(cs2)c3ccccn3)c1		0	0	0	0	0	0	0.19889
MMV676411	TUBERCULOSIS	CC(Oc1ccccc1)C(=O)Nc2nc(cs2)c3ccccn3		0.5	0	1	0.186344	0.375	0.5	0.279806
MMV676412	TUBERCULOSIS	Clc1ccc(cc1)S(=O)(=O)c2oc(nc2C#N)c3ccccc3		0	0	0.25	1	1	1	0.902783
MMV676431	TUBERCULOSIS	Cc1ccc(NC(=O)CC2COc3ccccc3O2)cc1Cl		0	0	0	0	0.125	0.2	0
MMV676439	TUBERCULOSIS	Cc1ccc2nc(Cl)c(CNCc3cccs3)cc2c1		0	0	0	0.0526316	0	0	0.0582642
MMV676444	TUBERCULOSIS	O=C(NC1CCCCC1)N2CCN(Cc3ccc4OCOc4c3)CC2		0	0	0	0	0	0	0.00838399
MMV676445	TUBERCULOSIS	CCCn1c(CNc2ccccc2O)nc3ccccc13		0	0	0	0	0	0	0
MMV676449	TUBERCULOSIS	CCc1nc2ccccc2n1CC(O)COc3cc(C)ccc3Cl		0	0	0	0	0.0625	0	0
MMV676461	TUBERCULOSIS	CCOC(=O)c1cc(on1)c2csc(Nc3c(C)cc(C)cc3C)n2		0.25	0.25	0	0.0526316	0.125	0.0545455	0
MMV676468	TUBERCULOSIS	NC(CC(=O)c1ccc(Cl)cc1Cl)C(Cl)(Cl)Cl		0	0	0	0	0	0	0.188048
MMV676470	TUBERCULOSIS	CCOc1ccc(OCC(=O)Nc2cc(C)cc(C)c2)cc1		0	0	0	0	0	0	0.209132
MMV676472	TUBERCULOSIS	COc1cccc(OC)c1C(=O)Nc2ccc(Cl)c(c2)c3nc4ccccc4s3		0.5	0.5	0.5	0.305263	0.375	0.5	0
MMV676474	TUBERCULOSIS	COc1ccccc1OCCCCn2c(nc3ccccc23)C4CC4		0	0	0	0	0	0	0.125618
MMV676476	TUBERCULOSIS	CC1=C(CCC(=O)O)C(=O)Oc2c(C)c(OCc3cc(C)cc(C)c3)ccc12		0.25	0.25	0	0	0	0	0.0946546
MMV676477	TUBERCULOSIS	CCC1=C(C)N=C(NC1=O)n2nc(C)cc2NC(=O)c3ccccc3SC		0	0.25	0.75	0.157895	0.9375	1	0.842502
MMV676478	TUBERCULOSIS	O=C(C1CCN(CC1)c2nnc(s2)n3cccc3)N4CCC(Cc5ccccc5)CC4		0.25	0.25	0	0	0	0	0
MMV676501	TUBERCULOSIS	Clc1ccc(s1)C(=O)Nc2oc(nn2)c3ccc(Cl)s3		0.5	1	1	0	0	0	0.863669
MMV676509	TUBERCULOSIS	Cc1ccc2oc(nc2c1)c3cc(NC(=O)Cc4ccccc4)ccc3Cl		0.25	0	0	0.105263	0.0625	0	0
MMV676512	TUBERCULOSIS	O=C(Nc1nc(cs1)c2ccccn2)c3cncn3c4ccccc4		0	0	0	0	0	0	0.193419
MMV676520	TUBERCULOSIS	O=C(N1CCN(Cc2ccc3OCOc3c2)CC1)c4oc5ccccc5c4		0	0	0	0.0526316	0	0	0
MMV676524	TUBERCULOSIS	Nc1cccnc1Nc2ccc(Cl)cc2		0	0	0	0.0157895	0.0972222	0.166667	0
MMV676526	TUBERCULOSIS	COc1ccc(cc1)c2cc(NC(=O)c3ccc(F)cc3Cl)ccc2OC		0	0.25	0	0	0.0625	0	0
MMV676539	TUBERCULOSIS	O=C(NCCc1c[nH]c2ccccc12)C3=Cc4ccccc4OC3=O		0.25	0	0	0.0526316	0.25	0.272727	0
MMV676554	TUBERCULOSIS	COc1ccc(Nc2ccccc2NC(=O)c3ccc(O)nc3)cc1		0	0	0	0.0526316	0.3125	0.2	0
MMV676555	TUBERCULOSIS	Cc1nnc(NCc2cccc(Cl)c2)c3ccccc13		0	0	0	0	0.0625	0	0
MMV676558	TUBERCULOSIS	CC1=NN(C(=O)C1Cc2cccc3ccccc23)c4nc5ccccc5s4		0	0	0	0	0	0	0.257384
MMV676571	TUBERCULOSIS	COc1ccc(cc1OC)c2onc(n2)c3cccc(NC(=O)Cc4ccc(F)cc4)c3		0	0	0.25	0.0526316	0	0	0
MMV676584	TUBERCULOSIS	Fc1ccc2c(Cl)c(sc2c1)C(=O)NC3=NCCS3		0	0	0	0	0	0	0.0784637
MMV676588	TUBERCULOSIS	Nc1c2CCCCc2nc3sc4CCCCc4c13		1	1	1	0.473684	0.75	0.418182	0.000733831
MMV676589	TUBERCULOSIS	O=C(CCC1CCCCC1)Nc2cccc(c2)c3oc(nn3)c4occc4		0.5	1	1	0.0526316	0	0	0
MMV676597	TUBERCULOSIS	CCCn1nnc(NC(=O)COc2ccc(cc2)C3CCCCC3)n1		0	0	0	0	0	0	0
MMV676603	TUBERCULOSIS	CC1COC2(CCN(CC2)C3=NC(=O)c4cc(cc(c4S3)[N+](=O)[O-])C(F)(F)F)O1		0.25	0	0	0	0.0625	0.0545455	0.0882843
MMV687138	TUBERCULOSIS	NC(=O)c1cc(ccc1OCCOc2ccccc2)c3ccsc3		0	0	0	0.0249307	0	0	0
MMV687145	TUBERCULOSIS	CCCCS(=O)(=O)Nc1ccc2cnn(C)c2c1		0	0	0	0	0	0	0
MMV687146	TUBERCULOSIS	Cc1cc(C)c2cc([nH]c2c1)C(=O)NC3CCCCCCC3		0	0.25	0	0.207756	0.166667	0.25	0
MMV687170	TUBERCULOSIS	COc1ccc(Cn2cnc3c(nc(Cl)nc23)c4occc4)cc1		0	0	0	0	0	0	0
MMV687172	TUBERCULOSIS	O=C(C1CCN(CC1)c2cc(ncn2)n3cccc3)N4CCc5ccccc5C4		0	0	0.25	0	0	0.111111	0
MMV687180	TUBERCULOSIS	CCc1ccc(cc1)[C@@H]2C[C@@H](n3ncc(C(=O)NCc4ccc(OC)cc4)c3N2)C(F)(F)F		0.25	0.25	0	0	0	0	0
MMV687188	TUBERCULOSIS	COc1ccc2nc(C)cc(OCC(=O)Nc3ccccc3OC)c2c1		0	0	0	0.0736842	0.0972222	0	0
MMV687189	TUBERCULOSIS	COc1ccc2nc(C)cc(OCC(=O)NCc3ccccc3)c2c1		0	0	0	0	0	0	0.136881
MMV687239	TUBERCULOSIS	CC(C)(C(=O)Nc1ccc(F)cc1)n2cc(cn2)c3ccccc3F		0	0	0	0	0	0	0
MMV687243	TUBERCULOSIS	NC(=O)c1cc(Br)ccc1OCCOc2ccccc2		0.25	0.25	0.5	0	0	0	0
MMV687248	TUBERCULOSIS	Nc1nc2ccc(cc2[nH]1)c3cncc(Oc4ccc(F)cc4)c3		0.5	0.25	0.25	0.189474	0.444444	0.583333	0
MMV687251	TUBERCULOSIS	CN1C(=O)N(C)c2nsc(c2C1=O)S(=O)(=O)C		1	1	1	1	1	1	0.836178
MMV687254	TUBERCULOSIS	CCCCc1ccc(nc1)C(=O)Nc2nccc3ccccc23		0.25	0	0.25	0	0	0	0
MMV687273	TUBERCULOSIS	CC(=CCC\C(=C/CNCCNC1C2CC3CC(CC1C3)C2)\C)C		1	1	1	1	1	1	0.706508
MMV687696	TUBERCULOSIS	CCc1nc2ccc(Cl)cn2c1C(=O)NCc3ccc(cc3)N4CCC(CC4)c5ccc(OC(F)(F)F)cc5		0.25	0	0	0	0	0	0.210493
MMV687699	TUBERCULOSIS	FC(F)(F)c1nc2ccccn2c1C(=O)NCc3cc(Cl)cc(Cl)c3		0	0.25	0	0.0249307	0.166667	0.0833333	0
MMV687700	TUBERCULOSIS	Nc1ncnc2c1ncn2[C@@H]3O[C@H](COS(=O)(=O)NC(=O)c4ccccc4O)[C@@H](O)[C@H]3O		0	0	0	0	0	0	0
MMV687703	TUBERCULOSIS	COc1cccc(n1)c2nc3c(cccc3n2CC4CCCN4)N5CCCC5		1	1	1	0.247368	0.722222	0.666667	0
MMV687729	TUBERCULOSIS	OC[C@H]1CN(C(=O)O1)c2cc(F)c(C3=CCN(Cc4ccccc4)CC3)c(F)c2		0	0	0.5	0	0	0	0
MMV687730	TUBERCULOSIS	CCCCOC(=O)Nc1cc2nc([nH]c2cc1N3CCCC3)C4CCCCC4		0.75	1	1	0.0157895	0.236111	0.416667	0
MMV687747	TUBERCULOSIS	Cc1cc(OCC(=O)NCc2ccccc2)c3cc(Br)ccc3n1		0	0	0	0	0	0	0
MMV687749	TUBERCULOSIS	C([C@@H]1CN(CCN1)c2nccc(Oc3ccc(cc3)n4ccnc4)n2)c5ccccc5		0	0	0	0	0	0	0
MMV687765	TUBERCULOSIS	Cc1cnc(nc1Oc2ccc(cc2)n3ccnc3)N4CCN[C@@H](Cc5ccccc5)C4		1	1	1	0.189474	0.444444	1	0.666505
MMV687807	TUBERCULOSIS	Oc1ccc(Cl)cc1C(=O)Nc2ccc(c(c2)C(F)(F)F)C(F)(F)F		1	1	1	1	1	1	0.502473
MMV687812	TUBERCULOSIS	CN1CCN(CCCOc2ncc(Nc3ncc(nc3C(=O)N)c4ccc(c(F)c4)C(F)(F)F)cn2)CC1		0.75	0.75	0.75	1	1	1	0.783649
MMV687813	TUBERCULOSIS	Fc1cc(cc(F)c1C2=CCN(Cc3ccccc3)CC2)N4C[C@H](COc5ccon5)OC4=O		0	0	0	0	0	0	0.154334
MMV688122	TUBERCULOSIS	Cc1cccc(n1)c2nc(Nc3ccncn3)c4sccc4n2		0.25	0.75	1	0.311522	0.583333	0.666667	0.460795
MMV688124	TUBERCULOSIS	CCc1ccc(cc1)S(=O)(=O)Nc2cc(CN3CCN(CCC(C)C)CC3)ccc2C		0.25	0.5	1	0.131579	0.305556	0.333333	0.0341319
MMV688125	TUBERCULOSIS	CCCc1ccc(cc1)S(=O)(=O)Nc2ccc(CN3CCN(CC4CC4)CC3)cc2		0	0	0	0.0157895	0	0.166667	0
MMV688262	TUBERCULOSIS	CC1(COc2ccc(cc2)N3CCC(CC3)Oc4ccc(OC(F)(F)F)cc4)Cn5cc(nc5O1)N(=O)=O	Delamanid	0	0	0	0.0249307	0	0	0
MMV688327	TUBERCULOSIS	CC(=O)NCC1CN(C(=O)O1)c2ccc(c(F)c2)c3ccc(CNCc4cn[nH]n4)cc3	Radezolid	0	0	0	0	0	0	0
MMV688466	TUBERCULOSIS	Cn1ccnc1CNCCS(=O)(=O)c2cccc(Nc3ccc(cn3)c4cccc(F)c4)c2		0	0	0	0	0	0	0
MMV688508	TUBERCULOSIS	CC(=O)NCC1CN(C(=O)O1)c2ccc(c(F)c2)c3ccc(CO)cc3		0	0.25	0	0	0	0	0
MMV688553	TUBERCULOSIS	O=C(NCc1cocc1)N2CCN(Cc3ccc4OCOc4c3)CC2		0	0	0	0	0	0	0.122973
MMV688554	TUBERCULOSIS	CNc1snc(C)c1C(=O)NCCOc2ccc(OC)cc2		0.25	0	0	0	0	0	0
MMV688555	TUBERCULOSIS	Clc1ccc(CN2CCN(CC2)C(=O)NCc3occc3)s1		0	0	0	0	0.125	0.127273	0
MMV688557	TUBERCULOSIS	NCC(c1cccs1)S(=O)(=O)c2ccccc2		0.25	0.25	0.5	0.0157895	0	0	0.412063
MMV688755	TUBERCULOSIS	[O-][N+](=O)c1cn2C[C@@H](COc2n1)OCc3ccc(OC(F)(F)F)cc3		0	0	0	0.0736842	0	0.0833333	0
MMV688756	TUBERCULOSIS	CC(=O)NC[C@H]1CN(C(=O)O1)c2ccc(N3CCSCC3)c(F)c2	Sutezolid	0	0	0	0	0	0	0
MMV688844	TUBERCULOSIS	COc1ccc2nccc(NC(=O)C3CCN(CCc4ccc(Cl)cc4)CC3)c2n1		0	0	0	0	0	0	0.113994
MMV688845	TUBERCULOSIS	O=C(Nc1ccccc1N2CCOCC2)[C@@H](Cc3ccccc3)NC(=O)c4cccs4		0	0	0	0.0736842	0	0	0
MMV688846	TUBERCULOSIS	Cc1ccccc1CN2CCC(O)(CC2)c3ccc(Cl)c(c3)C(F)(F)F		0.5	0	0.25	0	0	0	0.170867
MMV688888	TUBERCULOSIS	CN1CCN(CC1)c2cc(nc(n2)c3ccncc3)c4ccc(F)cc4		0	0	0	0.0526316	0.1875	0.127273	0.24571
MMV688889	TUBERCULOSIS	Clc1ccc(CCNc2cc(nc3ncnn23)c4ccccc4)cc1		0	0.25	0	0	0	0	0.0521127
MMV688891	TUBERCULOSIS	COc1cc(Br)cc2C=C(C(=O)Nc3cccc(c3)C(F)(F)F)C(=O)Oc12		0	0	0	0	0	0	0
MMV688936	TUBERCULOSIS	Clc1cccc2sc(nc12)N(CCCn3ccnc3)C(=O)c4occc4		0	0	0	0	0.25	0.2	0.400111
MMV688938	TUBERCULOSIS	CCOc1ccc(cc1)c2nc(CNCCc3ccc(F)cc3)cs2		0	0	0	0.157895	0.25	0.508772	0.811012
MMV688939	TUBERCULOSIS	Cc1ccc2nc(C)c(c3ccn(Cc4ccccc4)n3)n2c1		0.75	1	1	0	0	0	0
MMV688941	TUBERCULOSIS	COc1cc(CN2CCC3(CC2)C=Cc4ccccc34)cc5OCOc15		0.25	0.25	0	0	0	0.030303	0.144599
MMV1110498	WOLBACHIA LF	FC(F)(F)C1=C(C(N2CCCCC2)=O)N(C=CC=C3OC)C3=N1		0	0	0	0.0526316	0	0	0
MMV407539	WOLBACHIA LF	CCc1nc2ccc(cn2c1N(C)Cc3cccs3)C(=O)NCc4ccc5OCOc5c4		0	0	0	0	0	0	0
MMV676398	WOLBACHIA LF	CCS(=O)(=O)N(Cc1occc1)Cc2cc3ccc(C)cc3nc2O		0	0.25	0	0.0736842	0.166667	0.333333	0.315367

## Sheet: Table S9 
Venn diagramm						UCSD scores			Swiss TPH scores			FIOCRUZ (% viability) 72 h		Swiss TPH scores vs. adult S. mansoni*
Rack	Position	COMPOUND ID	Disease Set	SMILES	TRIVIAL NAME	24 h	48 h	72h	24 h	48 h	72 h	mean	SD	24 h	48 h	72 h	The leads were selected based on an effect ≥ 0.75 at 72 h
PathogenBox_PlateC	C03	MMV688283	KINETOPLASTIDS	CN1CCN(CC1)S(=O)(=O)c2ccc(cc2)c3ccc4c(Nc5ncc(Cl)cn5)ccnc4c3		2	4	4	0.6	0.611111	0.625	32.4102	3.95945	0.28	0.43	0.54
PathogenBox_PlateC	E08	MMV690102	KINETOPLASTIDS	COc1ccc(Oc2ccc(cc2)[C@@H](C)N(C)c3ncc4c(N)nc(N)nc4n3)cc1		4	4	4	0.526316	0.5	0.5	4.73538	1.18179	0.96	0.94	1	1
PathogenBox_PlateE	C06	MMV689244	KINETOPLASTIDS	FC(F)(F)c1ccc(cc1)N2CCN(CC2)C(=O)[C@@H](c3ccc(Cl)cc3)c4cccnc4		0	2	4	0.75	0.722222	0.75	46.7742	12.2227	0.02	0	0
PathogenBox_PlateE	G08	MMV658988	KINETOPLASTIDS	CN(CCc1ccccc1)c2nc(nc(C)c2Cl)c3ccccn3		1	4	4	0	0.189189	0.69697	20.6685	7.01198
PathogenBox_PlateB	H09	MMV020391	MALARIA	CC(C)C(C(=O)Nc1ccc(cc1)S(=O)(=O)N(C)C)c2ccc(Cl)cc2		2	4	4	0.954545	0.85	1	29.4612	1.72985	0.5	0.64	0.59
PathogenBox_PlateD	B07	MMV022029	MALARIA	CN1CCC(CC1)NCc2cccc(c2)c3ccc(cc3)S(=O)(=O)NCc4ccccc4		0	2	4	0.6	0.783784	0.939394	19.2103	11.8336	0.76	0.9	0.91	1
PathogenBox_PlateD	C07	MMV024114	MALARIA	Cc1ccc(cc1)S(=O)(=O)n2cc(c3ccnc(N)c3)c4cc(Br)cnc24		2	3	3	0.45	0.567568	0.515152	4.54628	8.18063
PathogenBox_PlateD	D11	MMV024406	MALARIA	Clc1cccc(NC(=O)c2cnc(N3CCN(CC3)c4ccncc4)c(Cl)c2)c1		2	4	4	0.8	0.945946	1	3.66635	3.9982	0.23	0.39	0.42
PathogenBox_PlateD	E02	MMV023233	MALARIA	Nc1nccc2ccc(cc12)c3ccc4nccn4c3		4	4	4	0.567568	0.777778	0.75	41.053	19.453	0.34	0.38	0.39
PathogenBox_PlateD	H03	MMV022478	MALARIA	Clc1cccc(c1)c2cnn3ccc(nc23)C(=O)Nc4ccc(cc4)N5CCNCC5		2	4	4	0.72973	0.777778	0.9375	7.6983	8.71804	0.5	0.81	0.91	1
PathogenBox_PlateA	A05	MMV689758	REFERENCE	COc1nc2ccc(Br)cc2cc1[C@@H](c3ccccc3)[C@@](O)(CCN(C)C)c4cccc5ccccc45	Bedaquiline	2	4	4	0.318182	0.8	0.945455	7.22669	3.69101
PathogenBox_PlateB	B06	MMV687800	REFERENCE	CC(C)N=C1C=C2N(c3ccc(Cl)cc3)c4ccccc4N=C2C=C1Nc5ccc(Cl)cc5	Clofazimine	4	4	4	1	1	1	16.5894	0.224074	0.75	0.86	0.86	1
PathogenBox_PlateB	H03	MMV000014	REFERENCE	O[C@H]([C@H]1CCCCN1)c2cc(nc3c(cccc23)C(F)(F)F)C(F)(F)F	Mefloquine	4	4	4	0.954545	1	1	-0.138817	1.68344	0.5	0.54	0.77	1
PathogenBox_PlateB	A11	MMV688761	SCHISTOSOMIASIS	CS(=O)(=O)c1ccc(cc1[N+](=O)[O-])C(=O)N(CC2CCCO2)c3nc4ccccc4s3		4	4	4	1	1	1	-7.95694	2.49397	1	1	1	1
PathogenBox_PlateB	C11	MMV688763	SCHISTOSOMIASIS	CNc1nnc(SC2=C(Cl)C(=O)N(N=C2)c3ccccc3)s1		4	4	4	1	1	1	-5.82868	4.92344	1	1	1	1
PathogenBox_PlateB	D11	MMV688762	SCHISTOSOMIASIS	C1CCN(C1)C(c2ccccn2)c3c([nH]c4ccccc34)c5ccccc5		4	4	4	1	1	1	-3.39538	3.72194	0.32	0.32	0.48
PathogenBox_PlateB	G10	MMV688768	SCHISTOSOMIASIS	CN1CCN(CC1)C(c2cccs2)c3c(C)[nH]c4ccccc34		3	4	4	1	1	1	6.43398	3.25935	0.54	0.68	0.68
PathogenBox_PlateD	A08	MMV688178	SCHISTOSOMIASIS	O(c1ccccc1)c1ccc(cc1)-c1cncc(n1)-c1ccc2[nH]ccc2c1		0	0	2	0.6	1	1	3.06398	8.47624	0.42	0.96	0.98	1
PathogenBox_PlateB	F05	MMV637229	TRICHURIASIS	ClC1=CC=C([C@@](C)(C2=CC=CC=C2)OCCC3N(C)CCC3)C=C1	Clemastine	2	4	4	0.9	1	1	46.5916	30.3845	0	0.03	0.27
PathogenBox_PlateA	B10	MMV102872	TUBERCULOSIS	FC(F)(F)c1cccc(c1)C(=O)Nc2oc(nn2)c3ccc(Cl)cc3		0	4	4	0.0909091	0.25	0.945455	-9.98354	3.73931
PathogenBox_PlateA	B11	MMV676477	TUBERCULOSIS	CCC1=C(C)N=C(NC1=O)n2nc(C)cc2NC(=O)c3ccccc3SC		0	1	3	0.272727	0.95	1	-1.12847	3.93966
PathogenBox_PlateA	D04	MMV661713	TUBERCULOSIS	Brc1cncc(c1)c2cc(NCCCn3ccnc3)nc(n2)c4ccccc4		1	4	4	0.272727	0.65	0.672727	12.8791	10.0789
PathogenBox_PlateA	D09	MMV676383	TUBERCULOSIS	CCC(Sc1oc2ccccc2n1)C(=O)Nc3nccs3		2	4	4	0.181818	1	1	7.05788	0.271453
PathogenBox_PlateA	F04	MMV676388	TUBERCULOSIS	COc1cccc(c1)n2nnnc2S(=O)(=O)Cc3ccccc3		4	4	4	1	1	1	-7.15087	7.46542	0.21	0.44	0.21
PathogenBox_PlateA	H09	MMV461553	TUBERCULOSIS	COC(=O)c1c2CCCCCc2sc1NC(=O)c3c(F)c(F)c(F)c(F)c3F		2	4	4	1	1	1	0.614913	1.87409	0.08	0.15	0.21
PathogenBox_PlateC	A05	MMV688122	TUBERCULOSIS	Cc1cccc(n1)c2nc(Nc3ccncn3)c4sccc4n2		1	3	4	0.405405	0.666667	0.75	39.9131	29.6609
PathogenBox_PlateC	C06	MMV687251	TUBERCULOSIS	CN1C(=O)N(C)c2nsc(c2C1=O)S(=O)(=O)C		4	4	4	1	1	1	-0.448452	3.38946	1	1	1	1
PathogenBox_PlateC	F04	MMV023969	TUBERCULOSIS	C(Nc1cccnc1)c2ccc(s2)c3cc4ccncc4cc3OC5CCNCC5		3	3	4	0.136364	0.45	0.555556	14.8115	8.36742
PathogenBox_PlateC	F08	MMV687807	TUBERCULOSIS	Oc1ccc(Cl)cc1C(=O)Nc2ccc(c(c2)C(F)(F)F)C(F)(F)F		4	4	4	1	1	1	35.4318	3.78174	1	1	1	1
PathogenBox_PlateC	G04	MMV021660	TUBERCULOSIS	Cc1cc(NCCc2ccccc2)nc(NC(=N)Nc3ccc(Cl)cc3)n1		4	4	4	1	1	1	8.49962	0.0507279	0.46	0.65	0.68
PathogenBox_PlateC	G06	MMV687273	TUBERCULOSIS	CC(=CCC\C(=C/CNCCNC1C2CC3CC(CC1C3)C2)\C)C		4	4	4	1	1	1	13.4938	10.231	0.46	0.64	0.88	1
PathogenBox_PlateD	F11	MMV687812	TUBERCULOSIS	CN1CCN(CCCOc2ncc(Nc3ncc(nc3C(=O)N)c4ccc(c(F)c4)C(F)(F)F)cn2)CC1		3	3	3	1	1	1	5.19952	11.5684	0.7	1	1	1
PathogenBox_PlateE	E11	MMV153413	TUBERCULOSIS	CCOC(=O)c1c(C)c(sc1NC(=O)c2c(F)c(F)c(F)c(F)c2F)C(=O)N		4	4	4	1	1	1	-3.41811	1.71405
PathogenBox_PlateE	F08	MMV272144	TUBERCULOSIS	COc1cccc(c1)n2nnnc2S(=O)(=O)C		4	4	4	1	1	1	-0.214395	2.1848	0.97	0.89	0.74	1	was considered as a lead given its high activity at 24h and 48h
PathogenBox_PlateE	C08	MMV687765	TUBERCULOSIS	Cc1cnc(nc1Oc2ccc(cc2)n3ccnc3)N4CCN[C@@H](Cc5ccccc5)C4		4	4	4	0.3	0.555556	1	17.7949	15.1557
															Number of leads		13
														*Pasche V, Laleu B, Keiser J. Early antischistosomal leads identified from in vitro and in vivo screening of the medicines for Malaria Venture Pathogen Box. ACS Infect Dis. 2019;5:102–10.
